# Supplementary material for: Stable association of RNAi machinery is conserved between the cytoplasm and nucleus of human cells
Source: RNA. 2016 Jul;22(7):1085–98. doi: 10.1261/rna.056499.116 (PMC4911916; doi:10.1261/rna.056499.116)
Supplement: Supplemental Material [file supp_056499.116_Supplementary_Tables.xlsx]

## Sheet: Key
Key for Tables:
Protein: Protein accession number (from UniProtKB unless a custom databases was used).
Description: Description taken from UniProt.
Peptide Spectrum Matches: Number of spectra assigned to peptides that contributed to the inference of the protein.
Peptide Sequences: Number of different unique peptide sequences, or modified variants of sequences that were identified for the protein.
% Sequence Coverage: Percentage of the protein sequence that was covered by the peptides identified for the protein
Indistinguishable proteins: Accession numbers for other sequences in the database that are indistinguishable from the first-reported sequence given the peptides observed.
SPECTRAL COUNTS: The weighted count of peptide spectrum matches assigned to each protein for the particular sample.
MIC SIn: The normalized Spectral Index statistic for the protein for the specified group (quantitative, approximate). Calculated from the intensity of fragment ions in each spectrum assigned to a particular protein.
Ratio: Quantitative ratio for protein between groups derived from the MIC Sin value

## Sheet: 1) Cyto_FLAG_non
Supplemental Table 1. Cytoplasmic FLAG-AGO2 non-RNase
									SPECTRAL COUNTS						SPECTRAL INDEX (MIC SIn)						RATIOS
Protein	Description	Length (AA)	mw (Da)	Indistinguishable Proteins	PSMs	Peptide Seqs	% Coverage	Modifications Observed	Control1	Control2	Control3	Sample1	Sample2	Sample3	Control1	Control2	Control3	Sample1	Sample2	Sample3	Control2/Control1	Control3/Control1	Sample1/Control1	Sample2/Control1	Sample3/Control1
P52732	KIF11_HUMAN Kinesin-like protein KIF11 OS=Homo sapiens GN=KIF11 PE=1 SV=2	1056	119391		2231	103	76.4	Acetyl (Protein N-term),Ammonia-loss (N-term C) + Carbamidomethyl (C),Carbamidomethyl (C),Gln->pyro-Glu (N-term Q),Glu->pyro-Glu (N-term E),Oxidation (M)	586	323	238	501	425	133	8.661e-05	1.687e-05	3.467e-06	4.173e-05	4.162e-05	1.597e-06	0.194781	0.04003	0.481815	0.480545	0.018439
P35579	MYH9_HUMAN Myosin-9 OS=Homo sapiens GN=MYH9 PE=1 SV=4	1960	226968		2085	201	75	Acetyl (Protein N-term),Ammonia-loss (N-term C) + Carbamidomethyl (C),Carbamidomethyl (C),Gln->pyro-Glu (N-term Q),Glu->pyro-Glu (N-term E),Oxidation (M)	293.85	621.3	352.25	254.86	169.33	363.71	3.39e-06	1.492e-05	1.356e-06	2.524e-06	2.266e-06	1.919e-06	4.40118	0.4	0.744543	0.668437	0.566077
Q9UKV8	AGO2_HUMAN Protein argonaute-2 OS=Homo sapiens GN=AGO2 PE=1 SV=3	859	97398		1724	73	84.7	Carbamidomethyl (C),Gln->pyro-Glu (N-term Q),Glu->pyro-Glu (N-term E),Oxidation (M)		1	4	439.75	594.67	678.89		4.234e-09	5.693e-09	4.359e-05	0.0001206	5.092e-05	Control2 Only	Control3 Only	Sample1 Only	Sample2 Only	Sample3 Only
P04264	K2C1_HUMAN Keratin, type II cytoskeletal 1 OS=Homo sapiens GN=KRT1 PE=1 SV=6	644	66179.1		1475	60	69.4	Acetyl (Protein N-term),Carbamidomethyl (C),Gln->pyro-Glu (N-term Q),Oxidation (M)	201	303	228	212.5	313	193.5	1.901e-05	4.567e-05	9.891e-06	2.025e-05	4.988e-05	7.849e-06	2.40242	0.520305	1.06523	2.62388	0.412888
O14744	ANM5_HUMAN Protein arginine N-methyltransferase 5 OS=Homo sapiens GN=PRMT5 PE=1 SV=4	637	72817.7		1322	52	77.7	Acetyl (Protein N-term),Ammonia-loss (N-term C) + Carbamidomethyl (C),Carbamidomethyl (C),Gln->pyro-Glu (N-term Q),Glu->pyro-Glu (N-term E),Oxidation (M)	218.09	208.76	222.69	225.58	126.96	189.18	6.832e-05	5.276e-05	1.577e-05	5.642e-05	2.04e-05	1.672e-05	0.772248	0.230826	0.82582	0.298595	0.244731
P13645	K1C10_HUMAN Keratin, type I cytoskeletal 10 OS=Homo sapiens GN=KRT10 PE=1 SV=6	584	58953.8		1182	43	70.2	Acetyl (Protein N-term),Carbamidomethyl (C),Gln->pyro-Glu (N-term Q),Oxidation (M)	151.84	325.76	144.84	150.84	251.8	142.85	1.215e-05	3.044e-05	8.007e-06	1.582e-05	2.98e-05	4.985e-06	2.50535	0.659012	1.30206	2.45267	0.410288
P01614	KV201_HUMAN Ig kappa chain V-II region Cum OS=Homo sapiens PE=1 SV=1	115	14733.4	P01617;P06309;P06310;	1146	2	14.2		215	161	170	207	158	205	0.006027	0.005267	0.007968	0.005883	0.004453	0.007542	0.873901	1.32205	0.976108	0.738842	1.25137
P35527	K1C9_HUMAN Keratin, type I cytoskeletal 9 OS=Homo sapiens GN=KRT9 PE=1 SV=3	623	62206.9		1057	38	69.5	Acetyl (Protein N-term),Carbamidomethyl (C),Gln->pyro-Glu (N-term Q),Oxidation (M)	146.2	232.25	163.87	159.1	197.65	147.97	7.659e-06	1.346e-05	3.793e-06	8.367e-06	1.879e-05	2.601e-06	1.75741	0.495234	1.09244	2.45332	0.3396
P35908	K22E_HUMAN Keratin, type II cytoskeletal 2 epidermal OS=Homo sapiens GN=KRT2 PE=1 SV=2	639	65573.3		864	58	86.5	Acetyl (Protein N-term),Carbamidomethyl (C),Oxidation (M)	119.88	168.7	145.7	125.79	160.76	136.82	6.195e-06	8.648e-06	3.641e-06	7.358e-06	1.008e-05	3.195e-06	1.39596	0.587732	1.18773	1.62712	0.515738
P60709	ACTB_HUMAN Actin, cytoplasmic 1 OS=Homo sapiens GN=ACTB PE=1 SV=1	375	41817.8		863	37	83.2	Acetyl (Protein N-term),Ammonia-loss (N-term C) + Carbamidomethyl (C),Carbamidomethyl (C),Gln->pyro-Glu (N-term Q),Glu->pyro-Glu (N-term E),Oxidation (M)	101.65	147.83	182.3	79.16	165.59	168.66	0.0001333	0.0001638	6.245e-05	8.302e-05	0.0002161	4.744e-05	1.22881	0.468492	0.622806	1.62116	0.355889
P05787	K2C8_HUMAN Keratin, type II cytoskeletal 8 OS=Homo sapiens GN=KRT8 PE=1 SV=7	483	56717.5	P05787-2;	787	66	91.7	Gln->pyro-Glu (N-term Q),Glu->pyro-Glu (N-term E),Oxidation (M)	88.34	260.71	127.29	63.62	149.97	86.51	8.425e-06	5.616e-05	5.299e-06	5.33e-06	1.575e-05	2.974e-06	6.66588	0.628961	0.632641	1.86944	0.352997
Q9UPY3	DICER_HUMAN Endoribonuclease Dicer OS=Homo sapiens GN=DICER1 PE=1 SV=3	1922	219119		752	114	61	Ammonia-loss (N-term C) + Carbamidomethyl (C),Carbamidomethyl (C),Gln->pyro-Glu (N-term Q),Oxidation (M)				215.38	293.05	231.26				2.186e-06	3.928e-06	8.738e-07			Sample1 Only	Sample2 Only	Sample3 Only
Q15208	STK38_HUMAN Serine/threonine-protein kinase 38 OS=Homo sapiens GN=STK38 PE=1 SV=1	465	54281.4		641	40	76.3	Acetyl (Protein N-term),Carbamidomethyl (C),Glu->pyro-Glu (N-term E),Oxidation (M)	104	134	109	93	98	101	1.39e-05	1.55e-05	4.695e-06	8.616e-06	8.626e-06	4.564e-06	1.11511	0.33777	0.619856	0.620576	0.328345
Q14204	DYHC1_HUMAN Cytoplasmic dynein 1 heavy chain 1 OS=Homo sapiens GN=DYNC1H1 PE=1 SV=5	4646	533459		611	168	38.7	Carbamidomethyl (C),Gln->pyro-Glu (N-term Q),Oxidation (M)	46	91	63	151	81	159	6.485e-08	1.154e-07	2.455e-08	3.245e-07	1.863e-07	1.14e-07	1.77949	0.378566	5.00386	2.87278	1.7579
Q9BQA1	MEP50_HUMAN Methylosome protein 50 OS=Homo sapiens GN=WDR77 PE=1 SV=1	342	36791.1		593	18	73.4	Carbamidomethyl (C),Glu->pyro-Glu (N-term E),Oxidation (M)	111.76	102.67	113.66	97.78	52.84	110.63	4.995e-05	3.326e-05	1.733e-05	3.471e-05	1.272e-05	1.302e-05	0.665866	0.346947	0.694895	0.254655	0.260661
P08727	K1C19_HUMAN Keratin, type I cytoskeletal 19 OS=Homo sapiens GN=KRT19 PE=1 SV=4	400	44187.2		582	43	84.5	Gln->pyro-Glu (N-term Q),Glu->pyro-Glu (N-term E),Oxidation (M)	70.88	154.72	86.91	64.4	104.86	69.94	6.543e-06	4.115e-05	3.333e-06	4.482e-06	1.16e-05	2.114e-06	6.28916	0.509399	0.685007	1.77289	0.323093
P19474	RO52_HUMAN E3 ubiquitin-protein ligase TRIM21 OS=Homo sapiens GN=TRIM21 PE=1 SV=1	475	54261.2		498	43	71.6	Ammonia-loss (N-term C) + Carbamidomethyl (C),Carbamidomethyl (C),Gln->pyro-Glu (N-term Q),Glu->pyro-Glu (N-term E),Oxidation (M)	78.42	99.22	86.31	68.48	65.48	90.27	7.571e-06	7.379e-06	2.476e-06	5.022e-06	3.688e-06	3.04e-06	0.97464	0.327037	0.663321	0.487122	0.401532
P49327	FAS_HUMAN Fatty acid synthase OS=Homo sapiens GN=FASN PE=1 SV=3	2511	273993		488	92	44.1	Acetyl (Protein N-term),Ammonia-loss (N-term C) + Carbamidomethyl (C),Carbamidomethyl (C),Gln->pyro-Glu (N-term Q),Oxidation (M)	100	63	65	151	52	44	4.897e-07	2.128e-07	5.854e-08	9.951e-07	3.001e-07	4.239e-08	0.434552	0.119543	2.03206	0.612824	0.0865632
E7EW20	E7EW20_HUMAN Unconventional myosin-VI OS=Homo sapiens GN=MYO6 PE=2 SV=1	1286	148943	Q9UM54-6;	447	78	59.7	Ammonia-loss (N-term C) + Carbamidomethyl (C),Carbamidomethyl (C),Gln->pyro-Glu (N-term Q),Oxidation (M)	111.9	154.47	60.41	20.8	56.45	26.75	1.21e-06	1.631e-06	1.012e-07	1.048e-07	5.742e-07	3.777e-08	1.34793	0.0836364	0.0866116	0.474545	0.0312149
P05783	K1C18_HUMAN Keratin, type I cytoskeletal 18 OS=Homo sapiens GN=KRT18 PE=1 SV=2	430	48154.6		404	36	72.6	Gln->pyro-Glu (N-term Q),Oxidation (M)	36.98	129.97	66.97	31.99	92.97	41.99	2.802e-06	1.964e-05	2.27e-06	2.184e-06	7.223e-06	1.147e-06	7.00928	0.810136	0.779443	2.5778	0.40935
Q9UPQ9	TNR6B_HUMAN Trinucleotide repeat-containing gene 6B protein OS=Homo sapiens GN=TNRC6B PE=1 SV=4	1833	194424		378	62	38.1	Carbamidomethyl (C),Gln->pyro-Glu (N-term Q),Oxidation (M)	1.99			109.91	101	155.46	6.528e-08			3.947e-07	7.951e-07	5.286e-07	Control1 Only	Control1 Only	6.04626	12.1798	8.09743
P78527	PRKDC_HUMAN DNA-dependent protein kinase catalytic subunit OS=Homo sapiens GN=PRKDC PE=1 SV=3	4128	470013		343	107	26	Ammonia-loss (N-term C) + Carbamidomethyl (C),Carbamidomethyl (C),Gln->pyro-Glu (N-term Q),Oxidation (M)	36.97	17.98	42.97	79.95	35.96	117.91	3.782e-08	1.789e-08	1.592e-08	1.185e-07	7.544e-08	8.424e-08	0.47303	0.420941	3.13326	1.99471	2.22739
P11142	HSP7C_HUMAN Heat shock cognate 71 kDa protein OS=Homo sapiens GN=HSPA8 PE=1 SV=1	646	71034.3		308	36	55.9	Carbamidomethyl (C),Oxidation (M)	24.39	24.35	19.47	57.35	92.32	77.8	4.875e-07	6.884e-07	1.836e-07	1.875e-06	6.797e-06	1.405e-06	1.4121	0.376615	3.84615	13.9426	2.88205
Q15149	PLEC_HUMAN Plectin OS=Homo sapiens GN=PLEC PE=1 SV=3	4684	515812	Q15149-2;Q15149-4;Q15149-5;Q15149-6;Q15149-7;Q15149-8;Q15149-9;	308	142	33.9	Carbamidomethyl (C),Gln->pyro-Glu (N-term Q),Glu->pyro-Glu (N-term E),Oxidation (M)	24.98	150.87	48.97	9.99	53.93	12	2.35e-08	2.209e-07	1.363e-08	8.526e-09	1.126e-07	3.112e-09	9.4	0.58	0.362809	4.79149	0.132426
Q9UH99	SUN2_HUMAN SUN domain-containing protein 2 OS=Homo sapiens GN=SUN2 PE=1 SV=3	717	80459.7		308	36	60.5	Carbamidomethyl (C),Gln->pyro-Glu (N-term Q),Oxidation (M)	47.51	50.44	33.65	84.14	31.66	55.42	1.813e-06	1.385e-06	3.331e-07	4.613e-06	7.773e-07	8.785e-07	0.763927	0.183729	2.5444	0.428737	0.484556
O00159-3	MYO1C_HUMAN Isoform 3 of Unconventional myosin-Ic OS=Homo sapiens GN=MYO1C	1044	119860		298	50	47.7	Ammonia-loss (N-term C) + Carbamidomethyl (C),Carbamidomethyl (C),Gln->pyro-Glu (N-term Q),Glu->pyro-Glu (N-term E),Oxidation (M)	73.07	5.94	14.81	41.52	79.03	74.12	1.169e-06	2.092e-08	2.029e-08	4.095e-07	1.31e-06	4.367e-07	0.0178956	0.0173567	0.350299	1.12062	0.373567
P23458	JAK1_HUMAN Tyrosine-protein kinase JAK1 OS=Homo sapiens GN=JAK1 PE=1 SV=2	1154	133533		284	48	44.5	Ammonia-loss (N-term C) + Carbamidomethyl (C),Carbamidomethyl (C),Gln->pyro-Glu (N-term Q),Glu->pyro-Glu (N-term E),Oxidation (M)	60	36	43	60	35	40	6.645e-07	2.822e-07	1.035e-07	5.23e-07	3.895e-07	1.164e-07	0.42468	0.155756	0.787058	0.586155	0.175169
P13647	K2C5_HUMAN Keratin, type II cytoskeletal 5 OS=Homo sapiens GN=KRT5 PE=1 SV=3	590	62502.1		272	52	65.9	Carbamidomethyl (C),Gln->pyro-Glu (N-term Q),Oxidation (M)	26.89	68.71	39.78	37.85	65.73	21.89	5.471e-07	3.09e-06	3.626e-07	7.536e-07	2.561e-06	2.396e-07	5.64796	0.662767	1.37744	4.68105	0.437946
Q00610	CLH1_HUMAN Clathrin heavy chain 1 OS=Homo sapiens GN=CLTC PE=1 SV=5	1675	188257	Q00610-2;	254	57	40.3	Acetyl (Protein N-term),Carbamidomethyl (C),Gln->pyro-Glu (N-term Q),Oxidation (M)	65.73	26.9	39.86	72.69	8.96	33.84	4.106e-07	9.065e-08	5.237e-08	4.829e-07	4.055e-08	6.357e-08	0.220774	0.127545	1.17608	0.0987579	0.154822
P15924	DESP_HUMAN Desmoplakin OS=Homo sapiens GN=DSP PE=1 SV=3	2871	332415		248	93	31.9	Carbamidomethyl (C),Gln->pyro-Glu (N-term Q),Oxidation (M)	26	88.99	25	35.49	39.99	18	5.226e-08	2.18e-07	1.611e-08	6.859e-08	1.465e-07	1.109e-08	4.17145	0.308266	1.31248	2.80329	0.212208
Q7Z406-6	MYH14_HUMAN Isoform 6 of Myosin-14 OS=Homo sapiens GN=MYH14	2003	229120		246	108	53.4	Acetyl (Protein N-term),Ammonia-loss (N-term C) + Carbamidomethyl (C),Carbamidomethyl (C),Gln->pyro-Glu (N-term Q),Glu->pyro-Glu (N-term E),Oxidation (M)	10.76	142.58	14.63	16.63	13.66	38.12	2.22e-08	9.129e-07	8.98e-09	3.407e-08	6.574e-08	4.07e-08	41.1216	0.404505	1.53468	2.96126	1.83333
P53621	COPA_HUMAN Coatomer subunit alpha OS=Homo sapiens GN=COPA PE=1 SV=2	1224	138618		246	62	52.8	Carbamidomethyl (C),Gln->pyro-Glu (N-term Q),Oxidation (M)	17	26.99	17.99	155.93	5	19.99	1.123e-07	1.087e-07	2.305e-08	2.703e-06	2.284e-08	3.103e-08	0.967943	0.205254	24.0695	0.203384	0.276313
Q9ULV0	MYO5B_HUMAN Unconventional myosin-Vb OS=Homo sapiens GN=MYO5B PE=1 SV=3	1848	214079		237	86	45.2	Acetyl (Protein N-term),Carbamidomethyl (C),Gln->pyro-Glu (N-term Q),Oxidation (M)	85.5	40	36	37	2.5		8.166e-07	1.539e-07	4.621e-08	2.265e-07	9.04e-09		0.188464	0.0565883	0.27737	0.0110703	Control1 Only
P02786	TFR1_HUMAN Transferrin receptor protein 1 OS=Homo sapiens GN=TFRC PE=1 SV=2	760	85034.1		226	30	44.1	Oxidation (M)	70.51	46.65	41.72	51.64	3.97	7.95	1.184e-06	6.585e-07	2.052e-07	6.334e-07	2.478e-08	2.67e-08	0.556166	0.173311	0.534966	0.0209291	0.0225507
P35580	MYH10_HUMAN Myosin-10 OS=Homo sapiens GN=MYH10 PE=1 SV=3	1976	229434		219	110	52.7	Ammonia-loss (N-term C) + Carbamidomethyl (C),Carbamidomethyl (C),Gln->pyro-Glu (N-term Q),Oxidation (M)	28.68	130.56	13.84	3.95	8.89	22.74	8.639e-08	7.358e-07	9.583e-09	6.702e-09	2.008e-08	3.748e-08	8.51719	0.110927	0.0775784	0.232434	0.433847
P04792	HSPB1_HUMAN Heat shock protein beta-1 OS=Homo sapiens GN=HSPB1 PE=1 SV=2	205	22822.5		219	19	72.2	Gln->pyro-Glu (N-term Q)	17	52	28	27	37	58	2.941e-06	9.844e-06	2.387e-06	4.741e-06	4.089e-06	7.109e-06	3.34716	0.811629	1.61204	1.39034	2.41721
Q9P219	DAPLE_HUMAN Protein Daple OS=Homo sapiens GN=CCDC88C PE=1 SV=3	2028	228685		201	56	28.1	Carbamidomethyl (C),Gln->pyro-Glu (N-term Q),Glu->pyro-Glu (N-term E),Oxidation (M)	60	17	33	52.99	6	23	1.871e-07	4.287e-08	2.804e-08	1.499e-07	1.475e-08	2.156e-08	0.229129	0.149866	0.801176	0.0788348	0.115232
F8VPD4	F8VPD4_HUMAN CAD protein OS=Homo sapiens GN=CAD PE=2 SV=1	2162	243496	P27708;	190	54	28.2	Acetyl (Protein N-term),Carbamidomethyl (C),Gln->pyro-Glu (N-term Q),Oxidation (M)	6	30	19	34	41	60	1.793e-08	6.881e-08	1.839e-08	1.726e-07	2.555e-07	1.527e-07	3.8377	1.02566	9.62632	14.2499	8.51645
Q13200	PSMD2_HUMAN 26S proteasome non-ATPase regulatory subunit 2 OS=Homo sapiens GN=PSMD2 PE=1 SV=3	908	100406		189	31	40.4	Carbamidomethyl (C),Gln->pyro-Glu (N-term Q),Oxidation (M)	37.64	28.71	31.72	55.45	6.95	22.81	4.488e-07	3.566e-07	1.151e-07	8.949e-07	4.22e-08	7.797e-08	0.794563	0.256462	1.99398	0.0940285	0.17373
P02533	K1C14_HUMAN Keratin, type I cytoskeletal 14 OS=Homo sapiens GN=KRT14 PE=1 SV=4	472	51655.5		188	38	73.1	Carbamidomethyl (C),Gln->pyro-Glu (N-term Q),Oxidation (M)	18	56	24	14.5	41	16.5	4.474e-07	2.642e-06	1.581e-07	4.54e-07	1.871e-06	1.214e-07	5.90523	0.353375	1.01475	4.18194	0.271346
P25705	ATPA_HUMAN ATP synthase subunit alpha, mitochondrial OS=Homo sapiens GN=ATP5A1 PE=1 SV=1	553	59875.7		178	27	55.5	Carbamidomethyl (C),Oxidation (M)	31.47	39.27	28.51	35.37	15.67	20.68	2.389e-06	2.009e-06	3.248e-07	1.854e-06	4.97e-07	2.2e-07	0.840938	0.135956	0.776057	0.208037	0.0920887
Q16875	F263_HUMAN 6-phosphofructo-2-kinase/fructose-2,6-bisphosphatase 3 OS=Homo sapiens GN=PFKFB3 PE=1 SV=1	520	58882	Q16875-2;Q5VX20;Q5W015;	178	36	64.5	Ammonia-loss (N-term C) + Carbamidomethyl (C),Carbamidomethyl (C),Gln->pyro-Glu (N-term Q),Oxidation (M)	53.16	9.86	35.37	25.62	29.51	11.8	5.199e-06	3.252e-07	5.004e-07	1.061e-06	1.586e-06	1.34e-07	0.0625505	0.0962493	0.204078	0.305059	0.0257742
P68104	EF1A1_HUMAN Elongation factor 1-alpha 1 OS=Homo sapiens GN=EEF1A1 PE=1 SV=1	462	50279.2	Q5VTE0;	176	15	30.7	Gln->pyro-Glu (N-term Q),Oxidation (M)	24.94	24.96	23.94	28.93	39.93	31.93	1.88e-06	1.58e-06	6.417e-07	2.416e-06	2.582e-06	9.569e-07	0.840426	0.34133	1.28511	1.3734	0.508989
F5H5D3	F5H5D3_HUMAN Tubulin alpha-1C chain OS=Homo sapiens GN=TUBA1C PE=2 SV=1	519	49989.5	Q9BQE3;	175	30	68.4	Carbamidomethyl (C),Gln->pyro-Glu (N-term Q),Glu->pyro-Glu (N-term E),Oxidation (M)	15.54	31.86	17.4	18.5	37.66	48.66	5.302e-06	8.705e-06	2.141e-06	6.382e-06	1.289e-05	7.14e-06	1.64183	0.40381	1.2037	2.43116	1.34666
P46940	IQGA1_HUMAN Ras GTPase-activating-like protein IQGAP1 OS=Homo sapiens GN=IQGAP1 PE=1 SV=1	1657	189620		175	46	30.7	Acetyl (Protein N-term),Carbamidomethyl (C),Oxidation (M)	30.99	47.97	28.97	24	16.99	17.97	1.649e-07	2.031e-07	2.696e-08	1.163e-07	7.936e-08	1.861e-08	1.23166	0.163493	0.705276	0.481261	0.112856
P48735	IDHP_HUMAN Isocitrate dehydrogenase [NADP], mitochondrial OS=Homo sapiens GN=IDH2 PE=1 SV=2	452	51002.9		164	25	55.5	Carbamidomethyl (C),Oxidation (M)	24.8	39.65	15.85	56.58	8.93	14.86	1.141e-06	1.435e-06	1.738e-07	4.339e-06	2.243e-07	1.792e-07	1.25767	0.152323	3.8028	0.196582	0.157055
Q86YZ3	HORN_HUMAN Hornerin OS=Homo sapiens GN=HRNR PE=1 SV=2	2850	283074		161	22	26.7	Gln->pyro-Glu (N-term Q)	13	63	15	14	46	10	3.184e-08	1.322e-07	1.012e-08	3.268e-08	1.491e-07	9.073e-09	4.15201	0.317839	1.02638	4.68279	0.284956
E9PLK3	E9PLK3_HUMAN Puromycin-sensitive aminopeptidase OS=Homo sapiens GN=NPEPPS PE=2 SV=1	915	103481	P55786;	161	30	35.6	Oxidation (M)	34.57	37.57	19.78	63.26			3.139e-07	5.803e-07	3.107e-08	8.383e-07			1.84868	0.0989806	2.6706	Control1 Only	Control1 Only
P55060	XPO2_HUMAN Exportin-2 OS=Homo sapiens GN=CSE1L PE=1 SV=3	971	107979	P55060-3;	161	32	31.9	Carbamidomethyl (C),Oxidation (M)	57.42	8.91	14.85	40.59	9.9	21.78	6.596e-07	1.056e-07	6.381e-08	4.437e-07	9.932e-08	8.142e-08	0.160097	0.0967404	0.67268	0.150576	0.123438
Q13085	ACACA_HUMAN Acetyl-CoA carboxylase 1 OS=Homo sapiens GN=ACACA PE=1 SV=2	2346	270530	Q13085-2;Q13085-3;Q13085-4;	156	57	27.8	Carbamidomethyl (C),Gln->pyro-Glu (N-term Q),Oxidation (M)	21.89	25.89	23.88	77.62		1.99	5.064e-08	4.429e-08	1.513e-08	3.283e-07		1.213e-09	0.874605	0.298776	6.48302	Control1 Only	0.0239534
P08238	HS90B_HUMAN Heat shock protein HSP 90-beta OS=Homo sapiens GN=HSP90AB1 PE=1 SV=4	724	83428.2		152	41	51.5	Ammonia-loss (N-term C) + Carbamidomethyl (C),Carbamidomethyl (C),Gln->pyro-Glu (N-term Q),Oxidation (M)	13.97	44.92	22.47	37.95	17.98	9	2.681e-07	1.54e-06	2.018e-07	1.314e-06	2.712e-07	5.326e-08	5.74413	0.752704	4.90116	1.01156	0.198657
P07437	TBB5_HUMAN Tubulin beta chain OS=Homo sapiens GN=TUBB PE=1 SV=2	444	49765		149	33	84	Carbamidomethyl (C),Glu->pyro-Glu (N-term E),Oxidation (M)	8.91	31.68	17.82	20.79	34.65	33.66	1.528e-06	3.364e-06	1.303e-06	5.993e-06	6.891e-06	8.07e-06	2.20157	0.852749	3.92212	4.50982	5.28141
P62805	H4_HUMAN Histone H4 OS=Homo sapiens GN=HIST1H4A PE=1 SV=2	103	11378.4		148	9	53.4	Oxidation (M)	13	54	6	18	47	6	1.804e-06	4.364e-05	3.459e-07	7.276e-06	4.425e-05	4.628e-07	24.1907	0.191741	4.03326	24.5288	0.256541
Q01813	K6PP_HUMAN 6-phosphofructokinase type C OS=Homo sapiens GN=PFKP PE=1 SV=2	784	85775.7		141	28	35.6	Carbamidomethyl (C),Gln->pyro-Glu (N-term Q),Oxidation (M)	7.43	20.33	14.38	38.17	22.81	25.77	8.942e-08	4.593e-07	6.984e-08	7.868e-07	5.226e-07	1.822e-07	5.13643	0.781033	8.79893	5.84433	2.03758
E7EMH5	E7EMH5_HUMAN Pyridoxal-dependent decarboxylase domain-containing protein 1 OS=Homo sapiens GN=PDXDC1 PE=2 SV=1	697	86886.4	E7EPL4;H3BND4;H3BNZ1;J3KNK7;Q6P996;	139	31	44.5	Carbamidomethyl (C),Oxidation (M)	4.98	32.93	20.94	12.93	1.99	61.81	4.805e-08	6.354e-07	2.188e-07	1.826e-07	7.052e-08	1.195e-06	13.2237	4.55359	3.80021	1.46764	24.8699
Q8N257	H2B3B_HUMAN Histone H2B type 3-B OS=Homo sapiens GN=HIST3H2BB PE=1 SV=3	126	13935.6		135	9	57.9	Gln->pyro-Glu (N-term Q),Oxidation (M)	8.82	42.16	12.77	16.67	37.29	12.76	1.62e-06	2.868e-05	1.168e-06	1.006e-05	2.561e-05	1.508e-06	17.7037	0.720988	6.20988	15.8086	0.930864
P11940	PABP1_HUMAN Polyadenylate-binding protein 1 OS=Homo sapiens GN=PABPC1 PE=1 SV=2	636	70806		134	32	51.4	Carbamidomethyl (C),Gln->pyro-Glu (N-term Q),Oxidation (M)	4.82	6.74	1.94	42.42	36.63	32.85	4.882e-08	1.069e-07	4.334e-09	1.576e-06	1.066e-06	5.161e-07	2.18968	0.0887751	32.2819	21.8353	10.5715
Q08211	DHX9_HUMAN ATP-dependent RNA helicase A OS=Homo sapiens GN=DHX9 PE=1 SV=4	1270	141247		134	42	34.4	Carbamidomethyl (C),Gln->pyro-Glu (N-term Q),Oxidation (M)	2	7	13	89	2	16	8.849e-09	2.304e-08	1.659e-08	1.092e-06	8.664e-09	3.815e-08	2.60368	1.87479	123.404	0.979094	4.31122
P06493	CDK1_HUMAN Cyclin-dependent kinase 1 OS=Homo sapiens GN=CDK1 PE=1 SV=3	297	34145.9		131	18	56.6	Oxidation (M)	24.86	26.87	9.93	46.78	2.99	12.91	3.616e-06	2.556e-06	4.211e-07	8.039e-06	2.56e-07	4.919e-07	0.706858	0.116455	2.22317	0.0707965	0.136034
Q16531	DDB1_HUMAN DNA damage-binding protein 1 OS=Homo sapiens GN=DDB1 PE=1 SV=1	1140	127212		129	30	28.7	Carbamidomethyl (C),Gln->pyro-Glu (N-term Q),Oxidation (M)	19.7	11.83	17.73	30.52	20.69	25.66	1.37e-07	5.716e-08	3.1e-08	2.222e-07	1.422e-07	8.787e-08	0.417226	0.226277	1.6219	1.03796	0.641387
P11021	GRP78_HUMAN 78 kDa glucose-regulated protein OS=Homo sapiens GN=HSPA5 PE=1 SV=2	654	72468.5		124	36	53.7	Oxidation (M)	13	12	7	20	36	28	2.393e-07	2.128e-07	5.709e-08	4.29e-07	1.076e-06	2.926e-07	0.88926	0.238571	1.79273	4.49645	1.22273
CONT_ALBU_HUMAN	Possible Contaminant ALBU_HUMAN	609	69501.6	P02768;	124	38	56.7	Ammonia-loss (N-term C) + Carbamidomethyl (C),Carbamidomethyl (C),Gln->pyro-Glu (N-term Q),Oxidation (M)		30.57	2.96		83.77	0.98		6.275e-07	4.903e-09		7.988e-06	1.932e-09	Control2 Only	Control3 Only		Sample2 Only	Sample3 Only
P17858	K6PL_HUMAN 6-phosphofructokinase, liver type OS=Homo sapiens GN=PFKL PE=1 SV=6	780	85180.3		123	29	41.8	Carbamidomethyl (C),Oxidation (M)	5	21.5	7.5	30	22.5	29.5	1.022e-07	4.138e-07	3.75e-08	1.114e-06	5.011e-07	2.226e-07	4.04892	0.366928	10.9002	4.90313	2.17808
E7ESA8	E7ESA8_HUMAN U4/U6 small nuclear ribonucleoprotein Prp31 OS=Homo sapiens GN=PRPF31 PE=2 SV=1	450	55565.5	Q8WWY3;	121	16	40	Carbamidomethyl (C),Gln->pyro-Glu (N-term Q),Oxidation (M)	21.58	15.73	19.65	30.45	11.8	15.72	1.512e-06	7.579e-07	3.761e-07	2.541e-06	3.809e-07	4.784e-07	0.501257	0.248743	1.68056	0.251918	0.316402
CONT_CAS1_BOVIN	Possible Contaminant CAS1_BOVIN	214	24567.5		116	13	65.9	Oxidation (M)	3	53	3	4	39	10	6.352e-07	6.603e-05	5.4e-08	6.905e-07	3.584e-05	2.666e-07	103.952	0.0850126	1.08706	56.4232	0.41971
Q9NQX4	MYO5C_HUMAN Unconventional myosin-Vc OS=Homo sapiens GN=MYO5C PE=1 SV=2	1742	203204		113	47	27.2	Acetyl (Protein N-term),Carbamidomethyl (C),Gln->pyro-Glu (N-term Q),Oxidation (M)	45.83	28.86	21.89	11.93		0.99	2.95e-07	9.759e-08	2.743e-08	3.764e-08		1.132e-09	0.330814	0.0929831	0.127593	Control1 Only	0.00383729
P07900	HS90A_HUMAN Heat shock protein HSP 90-alpha OS=Homo sapiens GN=HSP90AA1 PE=1 SV=5	732	98351.6	P07900-2;	112	36	44.7	Gln->pyro-Glu (N-term Q),Oxidation (M)	8.98	24.87	12.94	34.91	13.94	11.95	1.279e-07	5.479e-07	6.615e-08	6.317e-07	2.256e-07	6.366e-08	4.28382	0.517201	4.93901	1.76388	0.497733
CONT_TRFL_HUMAN	Possible Contaminant TRFL_HUMAN	710	78330	E7EQB2;E7ER44;P02788;	112	32	58.8	Ammonia-loss (N-term C) + Carbamidomethyl (C),Carbamidomethyl (C),Gln->pyro-Glu (N-term Q),Oxidation (M)		51.88			53.84			7.114e-07			1.269e-06		Control2 Only			Sample2 Only
Q9Y2H1	ST38L_HUMAN Serine/threonine-protein kinase 38-like OS=Homo sapiens GN=STK38L PE=1 SV=3	464	54094.5		109	27	46.8	Acetyl (Protein N-term),Carbamidomethyl (C),Oxidation (M)	25.83	13.93	24.86	18.89	5.96	14.94	1.34e-06	4.253e-07	2.542e-07	8.057e-07	1.161e-07	1.331e-07	0.317388	0.189701	0.601269	0.0866418	0.0993284
Q9NYL9	TMOD3_HUMAN Tropomodulin-3 OS=Homo sapiens GN=TMOD3 PE=1 SV=1	352	39660.4		104	12	45.2	Gln->pyro-Glu (N-term Q),Oxidation (M)	20.93	15.94	11.98	15.94	20.93	16.97	1.459e-06	8.144e-07	3.041e-07	7.073e-07	1.197e-06	3.628e-07	0.558191	0.20843	0.484784	0.820425	0.248663
Q14974	IMB1_HUMAN Importin subunit beta-1 OS=Homo sapiens GN=KPNB1 PE=1 SV=2	876	97360.2		103	16	21.7	Acetyl (Protein N-term),Oxidation (M)	21.89	16.91	10.93	21.87	9.96	17.89	3.897e-07	2.07e-07	3.748e-08	3.058e-07	1.135e-07	8.671e-08	0.531178	0.0961765	0.784706	0.29125	0.222504
P49411	EFTU_HUMAN Elongation factor Tu, mitochondrial OS=Homo sapiens GN=TUFM PE=1 SV=2	452	49636.3		102	19	48.9	Carbamidomethyl (C),Gln->pyro-Glu (N-term Q),Oxidation (M)	4	29	27	5	16	20	8.238e-08	1.159e-06	5.462e-07	9.39e-08	5.903e-07	4.925e-07	14.0689	6.63025	1.13984	7.16557	5.97839
P06576	ATPB_HUMAN ATP synthase subunit beta, mitochondrial OS=Homo sapiens GN=ATP5B PE=1 SV=3	529	56668.7		99	20	46.3	Oxidation (M)	20.77	23.73	20.78	15.8	5.93	9.92	7.167e-07	7.921e-07	2.119e-07	5.385e-07	8.662e-08	9.173e-08	1.1052	0.295661	0.75136	0.120859	0.127989
P52272	HNRPM_HUMAN Heterogeneous nuclear ribonucleoprotein M OS=Homo sapiens GN=HNRNPM PE=1 SV=3	730	73770.5	P52272-2;	99	31	45.4	Acetyl (Protein N-term),Carbamidomethyl (C),Oxidation (M)	5.93	38.5	8.91	20.73	10.86	10.87	5.12e-07	8.896e-07	3.857e-08	7.285e-07	1.374e-07	5.186e-08	1.7375	0.075332	1.42285	0.268359	0.101289
P53618	COPB_HUMAN Coatomer subunit beta OS=Homo sapiens GN=COPB1 PE=1 SV=3	953	107344		99	28	35.3	Carbamidomethyl (C),Gln->pyro-Glu (N-term Q),Oxidation (M)	10	3	1	24.99	32.97	25.99	9.306e-08	2.833e-08	8.984e-10	2.449e-07	4.455e-07	1.045e-07	0.304427	0.00965399	2.63164	4.78723	1.12293
P68032	ACTC_HUMAN Actin, alpha cardiac muscle 1 OS=Homo sapiens GN=ACTC1 PE=1 SV=1	377	42131.9	P68133;	99	26	47.2	Gln->pyro-Glu (N-term Q),Glu->pyro-Glu (N-term E),Oxidation (M)	16.67	17.65	15.7	14.7	20.59	10.79	6.311e-06	6.114e-06	1.41e-06	3.003e-06	5.618e-06	1.477e-06	0.968785	0.223419	0.475836	0.890192	0.234036
F5H335	F5H335_HUMAN Eukaryotic translation initiation factor 3 subunit A OS=Homo sapiens GN=EIF3A PE=2 SV=1	1348	166883	Q14152;	98	32	25.7	Carbamidomethyl (C),Oxidation (M)	24	19	12	38			1.849e-07	7.968e-08	8.49e-09	2.773e-07			0.430936	0.0459167	1.49973	Control1 Only	Control1 Only
P08779	K1C16_HUMAN Keratin, type I cytoskeletal 16 OS=Homo sapiens GN=KRT16 PE=1 SV=4	473	51362.3		95	37	71.7	Carbamidomethyl (C),Gln->pyro-Glu (N-term Q),Oxidation (M)	9	39	10	6	18	7	1.161e-07	1.57e-06	6.591e-08	9.125e-08	6.044e-07	3.575e-08	13.5228	0.5677	0.78596	5.20586	0.307924
Q6ZRV2	FA83H_HUMAN Protein FAM83H OS=Homo sapiens GN=FAM83H PE=1 SV=3	1179	127386		95	27	30.7	Carbamidomethyl (C),Gln->pyro-Glu (N-term Q)	2		1	39	22	30	5.463e-09		6.747e-10	2.559e-07	1.994e-07	1.062e-07	Control1 Only	0.123504	46.8424	36.5001	19.4399
Q86VP6	CAND1_HUMAN Cullin-associated NEDD8-dissociated protein 1 OS=Homo sapiens GN=CAND1 PE=1 SV=2	1230	136649		93	33	28.1	Acetyl (Protein N-term),Carbamidomethyl (C),Oxidation (M)	32.92	4	6.99	28.92	1	15.97	3.134e-07	2.244e-08	6.805e-09	2.224e-07	4.377e-09	2.955e-08	0.0716018	0.0217135	0.709636	0.0139662	0.0942884
Q92673	SORL_HUMAN Sortilin-related receptor OS=Homo sapiens GN=SORL1 PE=1 SV=2	2214	248915		93	44	21.6	Carbamidomethyl (C),Oxidation (M)				1.99	25.92	63.77				3.119e-09	1.134e-07	1.047e-07			Sample1 Only	Sample2 Only	Sample3 Only
B7Z6Z4	B7Z6Z4_HUMAN Myosin light polypeptide 6 OS=Homo sapiens GN=MYL6 PE=2 SV=1	238	16986.2	F8W1R7;G3V1V0;G8JLA2;J3KND3;P60660;P60660-2;	92	9	65.5	Carbamidomethyl (C),Oxidation (M)	7.88	40.35	5.9	6.9	19.68	6.89	1.224e-06	1.268e-05	1.468e-07	8.548e-07	3.19e-06	2.175e-07	10.3595	0.119935	0.698366	2.60621	0.177696
P07814	SYEP_HUMAN Bifunctional glutamate/proline--tRNA ligase OS=Homo sapiens GN=EPRS PE=1 SV=5	1512	170933		90	29	20.1	Carbamidomethyl (C),Gln->pyro-Glu (N-term Q),Oxidation (M)	21	8	19	23		14	1.117e-07	4.112e-08	1.882e-08	1.155e-07		1.639e-08	0.368129	0.168487	1.03402	Control1 Only	0.146732
P20671	H2A1D_HUMAN Histone H2A type 1-D OS=Homo sapiens GN=HIST1H2AD PE=1 SV=2	130	14135		89	7	40.8		4.08	19.44	4.56	8.08	14.99	5.07	6.772e-07	1.06e-05	2.275e-07	4.451e-06	9.922e-06	1.817e-07	15.6527	0.335942	6.57265	14.6515	0.268311
CONT_CAS2_BOVIN	Possible Contaminant CAS2_BOVIN	222	26056.3		88	15	40.5	Carbamidomethyl (C),Oxidation (M)	1	35	8	1	27	11	2.85e-08	2.5e-05	2.851e-07	3.702e-08	9.218e-06	4.796e-07	877.193	10.0035	1.29895	323.439	16.8281
CONT_TRYP_PIG	Possible Contaminant TRYP_PIG	231	24447.8		88	2	7.8		11	19	13	9	19	14	1.991e-05	5.92e-05	6.909e-06	2.41e-05	9.673e-05	1.225e-05	2.97338	0.347012	1.21045	4.85836	0.615269
Q14766	LTBP1_HUMAN Latent-transforming growth factor beta-binding protein 1 OS=Homo sapiens GN=LTBP1 PE=1 SV=4	1721	187248	Q14766-4;	88	30	20.2	Ammonia-loss (N-term C) + Carbamidomethyl (C),Carbamidomethyl (C),Oxidation (M)	4.92	1.96	3.94	25.5	12.76	37.33	9.289e-09	1.034e-08	4.563e-09	8.004e-08	1.017e-07	7.712e-08	1.11314	0.491226	8.61664	10.9484	8.30229
Q5SWX8	ODR4_HUMAN Protein odr-4 homolog OS=Homo sapiens GN=ODR4 PE=2 SV=1	454	51196.8		88	14	35	Carbamidomethyl (C),Oxidation (M)	10.89	5.94	10.89	24.75	13.86	17.82	4.205e-07	1.943e-07	1.15e-07	1.063e-06	5.156e-07	2.156e-07	0.462069	0.273484	2.52794	1.22616	0.512723
E9PDF6	E9PDF6_HUMAN Unconventional myosin-Ib OS=Homo sapiens GN=MYO1B PE=2 SV=1	1107	125178	O43795;O43795-2;	87	33	33.6	Carbamidomethyl (C),Gln->pyro-Glu (N-term Q),Oxidation (M)	15.93	12.94	3.99	25.9	13.95	6.97	7.568e-08	5.643e-08	5.753e-09	1.931e-07	1.05e-07	1.209e-08	0.74564	0.0760174	2.55153	1.38742	0.159752
O15084	ANR28_HUMAN Serine/threonine-protein phosphatase 6 regulatory ankyrin repeat subunit A OS=Homo sapiens GN=ANKRD28 PE=1 SV=5	1053	116375	O15084-1;O15084-4;	85	20	23.2	Carbamidomethyl (C),Oxidation (M)	20.38	7.95	13.93	23.9	3.98	9.96	1.91e-07	5.957e-08	1.912e-08	1.827e-07	2.673e-08	1.329e-08	0.311885	0.100105	0.956545	0.139948	0.0695812
P23396	RS3_HUMAN 40S ribosomal protein S3 OS=Homo sapiens GN=RPS3 PE=1 SV=2	243	26743.5		84	18	72	Carbamidomethyl (C),Oxidation (M)	1.93	3.89	2.9	43.99	12.65	14.6	9.674e-08	1.479e-07	3.015e-08	5.958e-06	5.75e-07	2.513e-07	1.52884	0.31166	61.5878	5.94377	2.59768
J3KNL6	J3KNL6_HUMAN Protein transport protein Sec16A OS=Homo sapiens GN=SEC16A PE=2 SV=1	2357	236255	O15027;O15027-2;O15027-3;O15027-4;O15027-5;	83	27	14.9	Carbamidomethyl (C),Glu->pyro-Glu (N-term E),Oxidation (M)	5	6	1	26	19	23	3.037e-08	1.597e-08	1.386e-09	5.347e-08	1.064e-07	3.93e-08	0.525848	0.0456371	1.76062	3.50346	1.29404
Q15633	TRBP2_HUMAN RISC-loading complex subunit TARBP2 OS=Homo sapiens GN=TARBP2 PE=1 SV=3	366	36982.8	Q15633-2;	83	14	41.7	Carbamidomethyl (C)				16.94	33.81	28.85				1.126e-06	3.438e-06	6.01e-07			Sample1 Only	Sample2 Only	Sample3 Only
O43242	PSMD3_HUMAN 26S proteasome non-ATPase regulatory subunit 3 OS=Homo sapiens GN=PSMD3 PE=1 SV=2	534	61083.6		82	24	47.6	Ammonia-loss (N-term C) + Carbamidomethyl (C),Carbamidomethyl (C),Oxidation (M)	7.99	13	11	30.94	7	9.99	1.498e-07	2.733e-07	7.074e-08	1.108e-06	1.037e-07	7.805e-08	1.82443	0.47223	7.39653	0.692256	0.521028
J3KMW7	J3KMW7_HUMAN E3 ubiquitin-protein ligase UBR5 OS=Homo sapiens GN=UBR5 PE=2 SV=1	2798	309987	O95071;	81	40	17	Carbamidomethyl (C),Gln->pyro-Glu (N-term Q),Oxidation (M)	1	2.97	6.98	3	2.98	54.9	1.33e-09	7.861e-08	1.193e-08	8.588e-09	6.049e-09	8.76e-08	59.1053	8.96992	6.45714	4.54812	65.8647
O94832	MYO1D_HUMAN Unconventional myosin-Id OS=Homo sapiens GN=MYO1D PE=1 SV=2	1006	116417		79	33	30.9	Carbamidomethyl (C),Gln->pyro-Glu (N-term Q),Oxidation (M)	26.73	5.94	11.88	4.95	4.95	17.84	2.882e-07	5.687e-08	1.934e-08	2.9e-08	4.492e-08	4.744e-08	0.197328	0.0671062	0.100625	0.155864	0.164608
Q92616	GCN1L_HUMAN Translational activator GCN1 OS=Homo sapiens GN=GCN1L1 PE=1 SV=6	2671	293365		78	38	15.7	Acetyl (Protein N-term),Gln->pyro-Glu (N-term Q),Oxidation (M)	19	4	1	28	6	15	4.475e-08	8.215e-09	7.055e-10	6.345e-08	8.767e-09	9.874e-09	0.183575	0.0157654	1.41788	0.195911	0.220648
P42704	LPPRC_HUMAN Leucine-rich PPR motif-containing protein, mitochondrial OS=Homo sapiens GN=LRPPRC PE=1 SV=3	1394	158219		77	39	28.3	Carbamidomethyl (C),Oxidation (M)	44.84	3	5.99	7.98		10.97	2.688e-07	5.845e-09	7.458e-09	2.679e-08		1.574e-08	0.0217448	0.0277455	0.0996652	Control1 Only	0.0585565
Q9UHB6	LIMA1_HUMAN LIM domain and actin-binding protein 1 OS=Homo sapiens GN=LIMA1 PE=1 SV=1	759	85389.5		76	25	36.1	Carbamidomethyl (C),Oxidation (M)	35.53	12.85	5.92	0.99	16.79		3.513e-07	1.795e-07	1.15e-08	1.335e-09	2.364e-07		0.510959	0.0327356	0.00380017	0.672929	Control1 Only
Q8NDV7-6	TNR6A_HUMAN Isoform 6 of Trinucleotide repeat-containing gene 6A protein OS=Homo sapiens GN=TNRC6A	1913	205584		75	25	16	Carbamidomethyl (C),Oxidation (M)				15.8	26.67	29.66				4.667e-08	1.618e-07	8.02e-08			Sample1 Only	Sample2 Only	Sample3 Only
CONT_CASB_BOVIN	Possible Contaminant CASB_BOVIN	224	25145.3		74	7	29	Oxidation (M)	5	23	8	6	15	9	4.666e-07	3.97e-05	5.192e-07	4.831e-07	1.518e-05	5.983e-07	85.0836	1.11273	1.03536	32.5332	1.28225
P33993	MCM7_HUMAN DNA replication licensing factor MCM7 OS=Homo sapiens GN=MCM7 PE=1 SV=4	719	81454.7		74	31	52.3	Acetyl (Protein N-term),Carbamidomethyl (C),Gln->pyro-Glu (N-term Q),Oxidation (M)	3.99	7.96	3.98	40.82	6.96	7.95	4.079e-08	9.159e-08	1.175e-08	1.245e-06	5.672e-08	4.119e-08	2.2454	0.288061	30.5222	1.39054	1.00981
P50416	CPT1A_HUMAN Carnitine O-palmitoyltransferase 1, liver isoform OS=Homo sapiens GN=CPT1A PE=1 SV=2	773	86399.7	P50416-2;	74	20	27.6	Carbamidomethyl (C),Oxidation (M)	2	8.99	3	18.98	16.99	18.98	1.938e-08	1.047e-07	9.364e-09	2.246e-07	2.223e-07	1.139e-07	5.40248	0.483179	11.5893	11.4706	5.87719
Q15645	PCH2_HUMAN Pachytene checkpoint protein 2 homolog OS=Homo sapiens GN=TRIP13 PE=1 SV=2	432	48646.6		74	14	31.9	Carbamidomethyl (C)	7.94	16.93	7.97	9.94	9.93	17.93	3.437e-07	6.251e-07	5.853e-08	4.458e-07	5.518e-07	2.045e-07	1.81874	0.170294	1.29706	1.60547	0.594996
P52597	HNRPF_HUMAN Heterogeneous nuclear ribonucleoprotein F OS=Homo sapiens GN=HNRNPF PE=1 SV=3	415	45750.9		73	12	39.8	Acetyl (Protein N-term),Carbamidomethyl (C),Oxidation (M)	6.94	6.94	3.98	22.84	14.86	16.9	3.738e-07	3.021e-07	1.384e-07	2.304e-06	1.093e-06	6.812e-07	0.808186	0.370251	6.16372	2.92402	1.82236
P58107	EPIPL_HUMAN Epiplakin OS=Homo sapiens GN=EPPK1 PE=1 SV=2	5090	556792		72	43	33.1	Carbamidomethyl (C),Gln->pyro-Glu (N-term Q),Oxidation (M)	5	22	1	25	14		1.795e-08	2.313e-08	1.965e-10	5.232e-08	2.615e-08		1.28858	0.0109471	2.91476	1.45682	Control1 Only
Q12965	MYO1E_HUMAN Unconventional myosin-Ie OS=Homo sapiens GN=MYO1E PE=1 SV=2	1108	127306		71	24	23.6	Carbamidomethyl (C),Oxidation (M)	4.98	23.96	21.94	1.99		16.97	2.344e-08	1.768e-07	3.777e-08	8.705e-09		2.865e-08	7.54266	1.61135	0.371374	Control1 Only	1.22227
Q7Z6Z7	HUWE1_HUMAN E3 ubiquitin-protein ligase HUWE1 OS=Homo sapiens GN=HUWE1 PE=1 SV=3	4374	482013	Q7Z6Z7-2;Q7Z6Z7-3;	70	39	10.8	Carbamidomethyl (C),Oxidation (M)	4.99	19.86	7.95	25.89		2.97	3.513e-09	2.229e-08	1.799e-09	4.701e-08		6.407e-10	6.345	0.512098	13.3817	Control1 Only	0.18238
Q00325	MPCP_HUMAN Phosphate carrier protein, mitochondrial OS=Homo sapiens GN=SLC25A3 PE=1 SV=2	362	40040.7	Q00325-2;	69	10	21.1	Oxidation (M)	8	14	8	5	18	15	3.616e-07	6.83e-07	9.374e-08	2.993e-07	1.064e-06	2.492e-07	1.88883	0.259237	0.82771	2.94248	0.689159
P41252	SYIC_HUMAN Isoleucine--tRNA ligase, cytoplasmic OS=Homo sapiens GN=IARS PE=1 SV=2	1262	144784		68	24	19.3	Oxidation (M)	19.92	12.94	11.93	18.92		0.99	1.537e-07	4.923e-08	9.374e-09	1.342e-07		4.819e-10	0.320299	0.0609889	0.873129	Control1 Only	0.00313533
P0CG38	POTEI_HUMAN POTE ankyrin domain family member I OS=Homo sapiens GN=POTEI PE=3 SV=1	1075	121511		68	11	11.3	Carbamidomethyl (C),Gln->pyro-Glu (N-term Q),Oxidation (M)	9.9	14.85	7.92	5.94	17.81	9.89	9.037e-08	3.132e-07	4.799e-08	3.853e-08	3.96e-07	5.687e-08	3.46575	0.531039	0.426358	4.38199	0.629302
K7EIJ6	K7EIJ6_HUMAN Unconventional myosin-Vb (Fragment) OS=Homo sapiens GN=MYO5B PE=4 SV=1	966	111977	Q9H6Y6;	67	42	44.7	Carbamidomethyl (C),Gln->pyro-Glu (N-term Q),Oxidation (M)	18.5	6	4	6	0.5		3.246e-07	3.994e-08	1.263e-08	6.699e-08	6.049e-09		0.123044	0.0389094	0.206377	0.0186352	Control1 Only
Q96P70	IPO9_HUMAN Importin-9 OS=Homo sapiens GN=IPO9 PE=1 SV=3	1041	116195		66	19	20.3	Acetyl (Protein N-term),Carbamidomethyl (C),Oxidation (M)	15	3	2	27	3	13	2.177e-07	1.747e-08	1.352e-09	2.879e-07	1.608e-08	4.53e-08	0.080248	0.00621038	1.32246	0.0738631	0.208085
P52701	MSH6_HUMAN DNA mismatch repair protein Msh6 OS=Homo sapiens GN=MSH6 PE=1 SV=2	1360	153085		66	29	21.6	Acetyl (Protein N-term),Carbamidomethyl (C),Glu->pyro-Glu (N-term E),Oxidation (M)		2.97	4.95	25.73	3.96	18.81		8.084e-09	3.235e-09	1.238e-07	1.453e-08	3.001e-08	Control2 Only	Control3 Only	Sample1 Only	Sample2 Only	Sample3 Only
Q13045	FLII_HUMAN Protein flightless-1 homolog OS=Homo sapiens GN=FLII PE=1 SV=2	1269	145038		66	22	20	Acetyl (Protein N-term),Carbamidomethyl (C),Gln->pyro-Glu (N-term Q),Oxidation (M)	8.89	16.8	10.88	16.78	0.99	6.92	4.837e-08	6.386e-08	1.697e-08	1.427e-07	5.257e-09	1.269e-08	1.32024	0.350837	2.95018	0.108683	0.262353
F8W1S1	F8W1S1_HUMAN Keratin, type II cytoskeletal 74 OS=Homo sapiens GN=KRT74 PE=2 SV=1	543	57973.7	Q7RTS7;	65	11	15.3	Carbamidomethyl (C)	8.56	6.93	6.02	8.2	6.93	4.41	2.597e-07	2.47e-07	5.467e-08	2.998e-07	2.386e-07	3.605e-08	0.951097	0.210512	1.15441	0.918752	0.138814
P05388	RLA0_HUMAN 60S acidic ribosomal protein P0 OS=Homo sapiens GN=RPLP0 PE=1 SV=1	317	34341.9		65	10	38.2	Carbamidomethyl (C)	3.84	12.57	0.97	24.04	12.55	8.73	6.479e-08	4.649e-07	4.214e-09	2.597e-06	5.722e-07	5.04e-07	7.17549	0.0650409	40.0833	8.83161	7.77898
A8MUB1	A8MUB1_HUMAN Tubulin alpha-4A chain OS=Homo sapiens GN=TUBA4A PE=2 SV=1	433	50018.4	P68366;	64	26	64.7	Carbamidomethyl (C),Gln->pyro-Glu (N-term Q),Oxidation (M)	0.97	6.83	7.82	8.79	12.71	23.57	4.113e-08	2.985e-07	3.817e-07	1.506e-06	5.267e-07	1.808e-06	7.25748	9.28033	36.6156	12.8057	43.9582
Q92900	RENT1_HUMAN Regulator of nonsense transcripts 1 OS=Homo sapiens GN=UPF1 PE=1 SV=2	1129	123282	Q92900-2;	64	35	33.7	Carbamidomethyl (C),Oxidation (M)				27	1	32.99				1.284e-07	4.798e-09	7.025e-08			Sample1 Only	Sample2 Only	Sample3 Only
P05164	PERM_HUMAN Myeloperoxidase OS=Homo sapiens GN=MPO PE=1 SV=1	745	87408.7	P05164-2;P05164-3;	64	26	38.5	Carbamidomethyl (C),Gln->pyro-Glu (N-term Q),Oxidation (M)		1			58.99			2.531e-09			1.996e-06		Control2 Only			Sample2 Only
P16615	AT2A2_HUMAN Sarcoplasmic/endoplasmic reticulum calcium ATPase 2 OS=Homo sapiens GN=ATP2A2 PE=1 SV=1	1042	109951	P16615-2;P16615-3;P16615-5;	63	19	23	Carbamidomethyl (C),Oxidation (M)	7.99	4.98	6.98	20.94	5.97	15.92	3.512e-08	4.211e-08	2.129e-08	1.059e-07	5.948e-08	4.158e-08	1.19903	0.606207	3.01538	1.69362	1.18394
P01859	IGHG2_HUMAN Ig gamma-2 chain C region OS=Homo sapiens GN=IGHG2 PE=1 SV=2	326	35967.8		62	12	44.8	Carbamidomethyl (C),Glu->pyro-Glu (N-term E),Oxidation (M)	8	6.5	6	7	17.5	6	5.325e-06	8.221e-06	1.948e-06	4.955e-06	4.802e-06	1.766e-06	1.54385	0.365822	0.930516	0.901784	0.331643
F8WE88	F8WE88_HUMAN Unconventional myosin-Va OS=Homo sapiens GN=MYO5A PE=2 SV=1	1852	219027	G3V394;Q9Y4I1;Q9Y4I1-2;Q9Y4I1-3;	62	44	25	Carbamidomethyl (C),Oxidation (M)	31.9	18.91	5.98	2.99			7.904e-08	4.996e-08	3.138e-09	3.93e-09			0.632085	0.0397014	0.0497217	Control1 Only	Control1 Only
P46781	RS9_HUMAN 40S ribosomal protein S9 OS=Homo sapiens GN=RPS9 PE=1 SV=3	194	22631.6		61	16	57.2	Oxidation (M)	4.99	3	1	36.93	4.99	2	6.854e-07	3.88e-07	1.13e-07	1.577e-05	5.035e-07	1.854e-08	0.566093	0.164867	23.0085	0.734608	0.0270499
P62191	PRS4_HUMAN 26S protease regulatory subunit 4 OS=Homo sapiens GN=PSMC1 PE=1 SV=1	440	49279.8		60	19	51.4	Carbamidomethyl (C),Oxidation (M)	6.99	11.99	6	23.97	3	4	2.434e-07	3.649e-07	8.124e-08	1.416e-06	6.907e-08	4.139e-08	1.49918	0.333772	5.81758	0.283772	0.170049
P01833	PIGR_HUMAN Polymeric immunoglobulin receptor OS=Homo sapiens GN=PIGR PE=1 SV=4	764	83447.8		59	24	34.3	Carbamidomethyl (C),Gln->pyro-Glu (N-term Q)		7			52			5.393e-08			3.244e-06		Control2 Only			Sample2 Only
P00338	LDHA_HUMAN L-lactate dehydrogenase A chain OS=Homo sapiens GN=LDHA PE=1 SV=2	332	39919.9	P00338-3;	59	11	31.6	Carbamidomethyl (C),Gln->pyro-Glu (N-term Q)	14.72	10.77	7.87	20.67	3.93		7.354e-07	6.704e-07	1.136e-07	1.757e-06	2.371e-07		0.911613	0.154474	2.38918	0.32241	Control1 Only
P43686	PRS6B_HUMAN 26S protease regulatory subunit 6B OS=Homo sapiens GN=PSMC4 PE=1 SV=2	418	47444.6		58	19	51	Acetyl (Protein N-term),Carbamidomethyl (C),Oxidation (M)	6	4	11	19	3	14	1.87e-07	1.056e-07	7.704e-08	9.394e-07	8.386e-08	1.272e-07	0.564706	0.411979	5.02353	0.448449	0.680214
CONT_CASK_BOVIN	Possible Contaminant CASK_BOVIN	190	21309.9		57	4	27.9	Carbamidomethyl (C),Oxidation (M)	1	24	5	1	19	6	7.134e-08	1.443e-05	1.364e-07	8.371e-08	7.344e-06	2.573e-07	202.271	1.91197	1.1734	102.944	3.60667
CONT_LYSC_HUMAN	Possible Contaminant LYSC_HUMAN	148	16562.3	F8VV32;P61626;	57	7	53.8	Carbamidomethyl (C),Oxidation (M)		18	1		32	1		1.607e-06	5.825e-09		2.295e-05	4.577e-09	Control2 Only	Control3 Only		Sample2 Only	Sample3 Only
P02545	LMNA_HUMAN Prelamin-A/C OS=Homo sapiens GN=LMNA PE=1 SV=1	664	69387.4	P02545-2;P02545-6;	54	27	48.8	Oxidation (M)	4.98	35.74	3.96	1	3.97	3.96	5.311e-08	8.291e-07	9.696e-09	8.501e-09	2.564e-08	1.039e-08	15.611	0.182564	0.160064	0.482772	0.195632
Q99460	PSMD1_HUMAN 26S proteasome non-ATPase regulatory subunit 1 OS=Homo sapiens GN=PSMD1 PE=1 SV=2	953	102463	Q99460-2;	51	24	35.1	Carbamidomethyl (C),Gln->pyro-Glu (N-term Q),Oxidation (M)	2	3	14.99	13		17.99	1.315e-08	8.914e-09	2.278e-08	1.094e-07		3.329e-08	0.677871	1.73232	8.31939	Control1 Only	2.53156
Q9UHL4	DPP2_HUMAN Dipeptidyl peptidase 2 OS=Homo sapiens GN=DPP7 PE=1 SV=3	492	54451.3		50	9	20.5	Carbamidomethyl (C)	7.95	3.96	2.98	14.92	1.98	12.94	1.901e-07	8.434e-08	2.106e-08	4.305e-07	3.995e-08	1.713e-07	0.443661	0.110784	2.2646	0.210153	0.901105
P08107	HSP71_HUMAN Heat shock 70 kDa protein 1A/1B OS=Homo sapiens GN=HSPA1A PE=1 SV=5	641	70189.1		49	19	31		1.97	3.95	1.98	4.93	23.72	7.9	2.024e-08	7.354e-08	8.223e-09	9.725e-08	6.17e-07	6.12e-08	3.6334	0.406275	4.80484	30.4842	3.02372
P61247	RS3A_HUMAN 40S ribosomal protein S3a OS=Homo sapiens GN=RPS3A PE=1 SV=2	264	29997.8		49	17	58.3	Carbamidomethyl (C),Oxidation (M)	0.96			42.78		1.95	2.257e-08			5.409e-06		1.783e-08	Control1 Only	Control1 Only	239.654	Control1 Only	0.789987
Q5VY93	Q5VY93_HUMAN Rho guanine nucleotide exchange factor 2 OS=Homo sapiens GN=ARHGEF2 PE=2 SV=1	987	108445	Q92974;Q92974-2;Q92974-3;	49	27	31.5	Carbamidomethyl (C),Oxidation (M)		3		45				1.743e-08		4.345e-07			Control2 Only		Sample1 Only
Q9UJW0	DCTN4_HUMAN Dynactin subunit 4 OS=Homo sapiens GN=DCTN4 PE=1 SV=1	460	53244.1	Q9UJW0-3;	49	13	33.3	Acetyl (Protein N-term),Carbamidomethyl (C),Oxidation (M)	8.97	16.93	12.97	8.95	1		2.656e-07	1.012e-06	1.04e-07	2.885e-07	1.711e-08		3.81024	0.391566	1.08622	0.0644202	Control1 Only
P40939	ECHA_HUMAN Trifunctional enzyme subunit alpha, mitochondrial OS=Homo sapiens GN=HADHA PE=1 SV=2	763	83163		49	24	36.6	Carbamidomethyl (C),Oxidation (M)	4	12	3	28	1	1	1.024e-07	1.462e-07	1.1e-08	8.312e-07	1.086e-08	4.486e-09	1.42773	0.107422	8.11719	0.106055	0.0438086
P18124	RL7_HUMAN 60S ribosomal protein L7 OS=Homo sapiens GN=RPL7 PE=1 SV=1	248	29279.2		48	12	44		1	6	3.99	15.92	6.99	10.95	4.026e-08	3.148e-07	4.551e-08	2.444e-06	3.383e-07	2.962e-07	7.81918	1.1304	60.7054	8.40288	7.35718
O43175	SERA_HUMAN D-3-phosphoglycerate dehydrogenase OS=Homo sapiens GN=PHGDH PE=1 SV=4	533	56758.5		48	11	23.6	Carbamidomethyl (C)	9	8.98	5	8	4.98	10.98	3.035e-07	1.934e-07	4.042e-08	2.374e-07	1.259e-07	1.182e-07	0.637232	0.13318	0.782208	0.414827	0.389456
CONT_REF_HEVBR	Possible Contaminant REF_HEVBR	138	14748.7		46	4	34.1		10	5	9	8	5	8	1.259e-06	2.933e-07	2.625e-07	5.415e-07	3.711e-07	2.688e-07	0.232963	0.208499	0.430103	0.294758	0.213503
P01876	IGHA1_HUMAN Ig alpha-1 chain C region OS=Homo sapiens GN=IGHA1 PE=1 SV=2	353	37720.7		46	10	30.9	Carbamidomethyl (C),Gln->pyro-Glu (N-term Q),Oxidation (M)		8.5			20.5			2.856e-07			6.242e-06		Control2 Only			Sample2 Only
P26641	EF1G_HUMAN Elongation factor 1-gamma OS=Homo sapiens GN=EEF1G PE=1 SV=3	437	50213.2		46	12	28.8	Acetyl (Protein N-term)	8	9	5	9	8	7	2.243e-07	2.2e-07	7.792e-08	2.538e-07	2.21e-07	1.425e-07	0.980829	0.347392	1.13152	0.985288	0.63531
H0YEN5	H0YEN5_HUMAN 40S ribosomal protein S2 (Fragment) OS=Homo sapiens GN=RPS2 PE=2 SV=1	195	31376.6	P15880;	46	12	59	Ammonia-loss (N-term C) + Carbamidomethyl (C),Carbamidomethyl (C)		0.98		37.37	1.96	3.93		3.63e-08		8.903e-06	7.638e-08	5.321e-08	Control2 Only		Sample1 Only	Sample2 Only	Sample3 Only
P35998	PRS7_HUMAN 26S protease regulatory subunit 7 OS=Homo sapiens GN=PSMC2 PE=1 SV=3	433	48729.2		46	18	38.1	Carbamidomethyl (C),Oxidation (M)	5	7	10	17		7	9.483e-08	1.29e-07	8.515e-08	4.979e-07		7.694e-08	1.36033	0.897923	5.25045	Control1 Only	0.811347
P54136	SYRC_HUMAN Arginine--tRNA ligase, cytoplasmic OS=Homo sapiens GN=RARS PE=1 SV=2	660	75511		46	23	37	Carbamidomethyl (C),Oxidation (M)	5.94	11.9	2.97	22.86	1		1.203e-07	1.599e-07	1.418e-08	4.852e-07	7.204e-09		1.32918	0.117872	4.03325	0.0598836	Control1 Only
P02538	K2C6A_HUMAN Keratin, type II cytoskeletal 6A OS=Homo sapiens GN=KRT6A PE=1 SV=3	564	60170.4		46	48	63.3	Acetyl (Protein N-term),Carbamidomethyl (C),Gln->pyro-Glu (N-term Q),Glu->pyro-Glu (N-term E),Oxidation (M)	3.49	18.44	3.98	4.98	10.48	1.99	4.415e-08	1.298e-06	3.169e-08	1.448e-07	6.888e-07	1.424e-08	29.3998	0.71778	3.27973	15.6014	0.322537
Q9C0C2	TB182_HUMAN 182 kDa tankyrase-1-binding protein OS=Homo sapiens GN=TNKS1BP1 PE=1 SV=4	1729	182189		46	25	18	Carbamidomethyl (C),Oxidation (M)				8	2	34				1.879e-08	6.699e-09	7.485e-08			Sample1 Only	Sample2 Only	Sample3 Only
P05109	S10A8_HUMAN Protein S100-A8 OS=Homo sapiens GN=S100A8 PE=1 SV=1	93	10845.7		45	11	62.4	Carbamidomethyl (C),Oxidation (M)		7	1		34			4.936e-07	1.345e-08		2.282e-05		Control2 Only	Control3 Only		Sample2 Only
P14923	PLAK_HUMAN Junction plakoglobin OS=Homo sapiens GN=JUP PE=1 SV=3	745	81908.9		45	20	29.9	Carbamidomethyl (C),Oxidation (M)	1.99	19.98	6.99	0.99	10.98	2	1.108e-08	2.372e-07	9.82e-09	3.447e-09	9.487e-08	1.709e-09	21.4079	0.886282	0.311101	8.56227	0.154242
B4DWJ2	B4DWJ2_HUMAN Glutamine--tRNA ligase OS=Homo sapiens GN=QARS PE=2 SV=1	764	87959	P47897;	44	18	25.4	Gln->pyro-Glu (N-term Q)	6.99	8.99	6.99	18.97			5.952e-08	7.937e-08	1.912e-08	3.833e-07			1.3335	0.321237	6.43985	Control1 Only	Control1 Only
K7ERE3	K7ERE3_HUMAN Keratin, type I cytoskeletal 13 OS=Homo sapiens GN=KRT13 PE=2 SV=1	415	45946.7	P13646;P13646-3;	44	20	42.9	Carbamidomethyl (C),Gln->pyro-Glu (N-term Q),Oxidation (M)	1.96	13.36	5.45	5.93	11.39	1.96	6.587e-08	6.857e-07	5.52e-08	1.232e-07	4.646e-07	1.739e-08	10.4099	0.838014	1.87035	7.05329	0.264005
E9PKF6	E9PKF6_HUMAN Serine/threonine-protein phosphatase 6 regulatory subunit 3 OS=Homo sapiens GN=PPP6R3 PE=2 SV=1	838	94637.4	G8JLI3;H7BXH2;Q5H9R7;Q5H9R7-2;Q5H9R7-3;Q5H9R7-4;Q5H9R7-5;Q5H9R7-6;	44	12	13.8	Carbamidomethyl (C),Gln->pyro-Glu (N-term Q),Oxidation (M)	7.92	5.94		14.85	5.94	5.94	4.702e-08	9.127e-08		1.403e-07	3.794e-08	1.304e-08	1.94109	Control1 Only	2.98384	0.806891	0.277329
F8WCY5	F8WCY5_HUMAN Reticulocalbin-2 OS=Homo sapiens GN=RCN2 PE=2 SV=1	335	36943.7	Q14257;	44	11	34.7	Oxidation (M)	2		1	3.99	24.98	7	1.62e-07		6.921e-09	2.569e-07	8.788e-07	1.887e-07	Control1 Only	0.0427222	1.5858	5.42469	1.16481
P50502	F10A1_HUMAN Hsc70-interacting protein OS=Homo sapiens GN=ST13 PE=1 SV=2	369	41413.5		44	9	25.2	Gln->pyro-Glu (N-term Q),Oxidation (M)	8.92	4.95	6.93	7.93	3.96	8.93	6.968e-07	1.55e-07	1.473e-07	7.111e-07	1.225e-07	1.818e-07	0.222445	0.211395	1.02052	0.175804	0.260907
P55884	EIF3B_HUMAN Eukaryotic translation initiation factor 3 subunit B OS=Homo sapiens GN=EIF3B PE=1 SV=3	814	99219.2	P55884-2;	44	12	16.8	Acetyl (Protein N-term),Carbamidomethyl (C),Oxidation (M)	7.99	8	11	13.99	1	1	7.995e-08	6.922e-08	2.307e-08	1.66e-07	8.083e-09	1.068e-09	0.865791	0.288555	2.0763	0.101101	0.0133583
Q9H4A4	AMPB_HUMAN Aminopeptidase B OS=Homo sapiens GN=RNPEP PE=1 SV=2	650	72729.6		44	21	36	Acetyl (Protein N-term),Carbamidomethyl (C),Gln->pyro-Glu (N-term Q),Oxidation (M)	5	12.97	1	24.93			5.242e-08	1.515e-07	2.102e-09	8.443e-07			2.89012	0.0400992	16.1064	Control1 Only	Control1 Only
P10412	H14_HUMAN Histone H1.4 OS=Homo sapiens GN=HIST1H1E PE=1 SV=2	219	21906		43	9	34.2	Acetyl (Protein N-term)		26.94			15.97			2.026e-06			1.512e-06		Control2 Only			Sample2 Only
P31025	LCN1_HUMAN Lipocalin-1 OS=Homo sapiens GN=LCN1 PE=1 SV=1	176	19273.8		43	5	28.4			19			23			2.628e-06			3.812e-06		Control2 Only			Sample2 Only
Q7L576	CYFP1_HUMAN Cytoplasmic FMR1-interacting protein 1 OS=Homo sapiens GN=CYFIP1 PE=1 SV=1	1253	145449		43	21	17.3	Oxidation (M)	5.88	5.89	3.94	25.53			2.161e-08	2.267e-08	4.125e-09	1.68e-07			1.04905	0.190884	7.77418	Control1 Only	Control1 Only
O95373	IPO7_HUMAN Importin-7 OS=Homo sapiens GN=IPO7 PE=1 SV=1	1038	119746		42	14	15.3	Carbamidomethyl (C),Gln->pyro-Glu (N-term Q),Oxidation (M)	14		4	14	1	7	1.406e-07		4.344e-09	1.17e-07	5.037e-09	1.409e-08	Control1 Only	0.0308962	0.832148	0.035825	0.100213
F8VSC5	F8VSC5_HUMAN SCY1-like protein 2 (Fragment) OS=Homo sapiens GN=SCYL2 PE=2 SV=1	681	103913	Q6P3W7;	41	16	27	Carbamidomethyl (C),Gln->pyro-Glu (N-term Q),Oxidation (M)	11	9	12	5	1	1	1.968e-07	1.299e-07	1.711e-07	9.85e-08	1.064e-08	2.006e-09	0.660061	0.869411	0.500508	0.054065	0.0101931
P36578	RL4_HUMAN 60S ribosomal protein L4 OS=Homo sapiens GN=RPL4 PE=1 SV=5	427	47793.5		41	11	25.5	Carbamidomethyl (C),Oxidation (M)	0.99	2.98	2.99	19.88	1.99	10.96	2.089e-08	6.843e-08	1.104e-08	1.013e-06	4.714e-08	1.06e-07	3.27573	0.528483	48.4921	2.25658	5.0742
P81605	DCD_HUMAN Dermcidin OS=Homo sapiens GN=DCD PE=1 SV=2	110	11294.8		41	7	42.7		1	13	2		20	2	1.59e-07	1.901e-06	4.806e-08		5.647e-06	4.09e-08	11.956	0.302264	Control1 Only	35.5157	0.257233
Q9HCE1	MOV10_HUMAN Putative helicase MOV-10 OS=Homo sapiens GN=MOV10 PE=1 SV=2	1003	113888		41	24	26	Carbamidomethyl (C),Oxidation (M)				14.88	3.97	21.82				1.192e-07	2.225e-08	5.154e-08			Sample1 Only	Sample2 Only	Sample3 Only
P08237	K6PF_HUMAN 6-phosphofructokinase, muscle type OS=Homo sapiens GN=PFKM PE=1 SV=2	780	85344.5		40	18	25.3	Acetyl (Protein N-term),Carbamidomethyl (C),Oxidation (M)	0.99	9.87	0.99	13.83	8.87	4.93	8.736e-09	8.919e-08	1.667e-09	2.732e-07	1.457e-07	4.056e-08	10.2095	0.19082	31.2729	16.6781	4.64286
B4DEB1	B4DEB1_HUMAN Histone H3 OS=Homo sapiens GN=H3F3A PE=2 SV=1	123	15414.5	K7EK07;K7EMV3;K7ES00;P68431;P84243;Q16695;Q71DI3;	40	4	29.3		2	9	4	5	8	6	1.061e-06	8.497e-06	2.398e-07	5.072e-06	1.207e-05	6.531e-07	8.00848	0.226013	4.7804	11.3761	0.615551
M0R210	M0R210_HUMAN 40S ribosomal protein S16 OS=Homo sapiens GN=RPS16 PE=2 SV=1	129	16471.1	P62249;	40	12	72.9	Carbamidomethyl (C)	1.97	3.95		27.85	4.95		1.806e-07	3.685e-07		1.384e-05	5.209e-07		2.04042	Control1 Only	76.6334	2.88427	Control1 Only
P01834	IGKC_HUMAN Ig kappa chain C region OS=Homo sapiens GN=IGKC PE=1 SV=1	106	11619.7		39	7	88.7	Carbamidomethyl (C)		6			32			2.5e-07			1.005e-05		Control2 Only			Sample2 Only
P62195	PRS8_HUMAN 26S protease regulatory subunit 8 OS=Homo sapiens GN=PSMC5 PE=1 SV=1	406	44863.8	P62195-2;	39	16	49	Carbamidomethyl (C),Oxidation (M)	3.96	6.9	5.95	10.88	3.98	5.93	1.022e-07	1.299e-07	7.748e-08	3.987e-07	7.221e-08	1.171e-07	1.27104	0.758121	3.90117	0.706556	1.14579
Q9NZ32	ARP10_HUMAN Actin-related protein 10 OS=Homo sapiens GN=ACTR10 PE=1 SV=1	417	46385.4		39	12	31.9	Carbamidomethyl (C),Oxidation (M)	7.99	13.97	8.97	6.98		1	3.816e-07	6.923e-07	1.01e-07	3.552e-07		6.4e-09	1.8142	0.264675	0.930818	Control1 Only	0.0167715
B4DL14	B4DL14_HUMAN ATP synthase subunit gamma OS=Homo sapiens GN=ATP5C1 PE=2 SV=1	250	32932.3	P36542;P36542-2;	38	9	36.4	Carbamidomethyl (C),Oxidation (M)	7	11	3	11	2	3	5.747e-07	8.591e-07	6.262e-08	8.396e-07	1.061e-07	6.356e-08	1.49487	0.108961	1.46094	0.184618	0.110597
P13639	EF2_HUMAN Elongation factor 2 OS=Homo sapiens GN=EEF2 PE=1 SV=4	858	95529.1		38	14	16.7	Carbamidomethyl (C),Oxidation (M)	2	9	3	14	6	4	1.473e-08	1.552e-07	4.48e-09	1.738e-07	6.419e-08	7.238e-09	10.5363	0.304141	11.799	4.35777	0.491378
Q04695	K1C17_HUMAN Keratin, type I cytoskeletal 17 OS=Homo sapiens GN=KRT17 PE=1 SV=2	432	48202.1		38	31	61.3	Carbamidomethyl (C),Oxidation (M)		25.47			8.02			6.357e-07			3.254e-07		Control2 Only			Sample2 Only
O75340	PDCD6_HUMAN Programmed cell death protein 6 OS=Homo sapiens GN=PDCD6 PE=1 SV=1	191	21908.8		38	6	29.8	Oxidation (M)	10.95	5.98	2.98	8.96	4.98	3.98	2.174e-06	1.184e-06	4.02e-08	1.762e-06	4.256e-07	5.442e-08	0.544618	0.0184913	0.810488	0.195768	0.0250322
H3BRG4	H3BRG4_HUMAN Cytochrome b-c1 complex subunit 2, mitochondrial OS=Homo sapiens GN=UQCRC2 PE=2 SV=1	412	48539	P22695;	37	12	38.8	Oxidation (M)	2.99	3.97	3.97	9.97	3.97	11.94	5.042e-08	8.708e-08	4.743e-08	1.774e-07	1.088e-07	1.009e-07	1.72709	0.940698	3.51845	2.15787	2.00119
P01625	KV402_HUMAN Ig kappa chain V-IV region Len OS=Homo sapiens PE=1 SV=2	114	14992.5	P06312;P06313;P06314;	37	3	27.2		5	6	5	5	7	5	2.986e-06	3.751e-06	7.419e-07	2.226e-06	2.722e-06	2.756e-07	1.2562	0.248459	0.745479	0.911587	0.0922974
Q8N3C0	ASCC3_HUMAN Activating signal cointegrator 1 complex subunit 3 OS=Homo sapiens GN=ASCC3 PE=1 SV=3	2202	251949		37	31	14.2	Carbamidomethyl (C),Oxidation (M)	1			35		1	1.504e-08			1.049e-07		9.224e-10	Control1 Only	Control1 Only	6.97473	Control1 Only	0.0613298
P38646	GRP75_HUMAN Stress-70 protein, mitochondrial OS=Homo sapiens GN=HSPA9 PE=1 SV=2	679	73832.9		36	16	28.4	Oxidation (M)	4.99	5		6.98	13.97	4	8.458e-08	6.541e-08		9.501e-08	2.054e-07	1.574e-08	0.773351	Control1 Only	1.12332	2.42847	0.186096
P68371	TBB4B_HUMAN Tubulin beta-4B chain OS=Homo sapiens GN=TUBB4B PE=1 SV=1	445	49925.1		36	33	83.8	Carbamidomethyl (C),Glu->pyro-Glu (N-term E),Oxidation (M)	4	5	4	6	7	10	5.51e-07	9.457e-07	3.691e-07	1.984e-06	2.283e-06	2.241e-06	1.71633	0.669873	3.60073	4.14338	4.06715
P06702	S10A9_HUMAN Protein S100-A9 OS=Homo sapiens GN=S100A9 PE=1 SV=1	114	13251.5		35	8	71.1	Oxidation (M)		7			28			3.747e-07			1.652e-05		Control2 Only			Sample2 Only
O00571	DDX3X_HUMAN ATP-dependent RNA helicase DDX3X OS=Homo sapiens GN=DDX3X PE=1 SV=3	662	71491	O00571-2;	35	15	24.5		4.99	4		15.98	4.99	2	7.906e-08	4.194e-08		4.452e-07	7.162e-08	6.81e-09	0.530483	Control1 Only	5.63117	0.905894	0.0861371
P14618	KPYM_HUMAN Pyruvate kinase PKM OS=Homo sapiens GN=PKM PE=1 SV=4	531	58044.1		34	16	38	Carbamidomethyl (C),Oxidation (M)		1.2		0.6	19.23			1.251e-08		5.081e-09	4.001e-07		Control2 Only		Sample1 Only	Sample2 Only
P14868	SYDC_HUMAN Aspartate--tRNA ligase, cytoplasmic OS=Homo sapiens GN=DARS PE=1 SV=2	501	45850.2	Q68CR9;	34	13	33.2	Oxidation (M)	7.99	3	6	14.99		1	1.72e-07	7.474e-08	3.165e-08	4.079e-07		5e-09	0.434535	0.184012	2.37151	Control1 Only	0.0290698
G3XAB8	G3XAB8_HUMAN Trinucleotide repeat containing 6C, isoform CRA_a OS=Homo sapiens GN=TNRC6C PE=2 SV=1	1726	180057	Q9HCJ0;Q9HCJ0-2;	34	18	14.3	Acetyl (Protein N-term),Carbamidomethyl (C),Oxidation (M)				5	8	21				6.351e-09	5.057e-08	2.636e-08			Sample1 Only	Sample2 Only	Sample3 Only
P04406	G3P_HUMAN Glyceraldehyde-3-phosphate dehydrogenase OS=Homo sapiens GN=GAPDH PE=1 SV=3	335	31600	P04406-2;	34	12	53.2	Carbamidomethyl (C),Oxidation (M)	1	4	2	1	24.98	1	1.678e-08	7.925e-08	6.389e-09	1.286e-08	1.748e-06	2.182e-09	4.72288	0.380751	0.766389	104.172	0.130036
Q9Y285	SYFA_HUMAN Phenylalanine--tRNA ligase alpha subunit OS=Homo sapiens GN=FARSA PE=1 SV=3	508	57671.6		34	14	27.4	Acetyl (Protein N-term),Oxidation (M)	4.94	2.97		20.71	3.94		1.167e-07	5.913e-08		9.389e-07	7.631e-08		0.506684	Control1 Only	8.04542	0.653899	Control1 Only
C9J9K3	C9J9K3_HUMAN 40S ribosomal protein SA (Fragment) OS=Homo sapiens GN=RPSA PE=2 SV=1	264	32905.5	P08865;	33	8	36.7	Acetyl (Protein N-term),Oxidation (M)	3	3	2	6.99	6	9.99	1.076e-07	1.374e-07	3.492e-08	1.367e-06	3.961e-07	3.619e-07	1.27695	0.324535	12.7045	3.68123	3.36338
P08729	K2C7_HUMAN Keratin, type II cytoskeletal 7 OS=Homo sapiens GN=KRT7 PE=1 SV=5	469	51480.4		33	28	49.7	Acetyl (Protein N-term),Oxidation (M)		23.66	2		5	2		7.211e-07	1.703e-08		7.717e-08	1.114e-08	Control2 Only	Control3 Only		Sample2 Only	Sample3 Only
P67809	YBOX1_HUMAN Nuclease-sensitive element-binding protein 1 OS=Homo sapiens GN=YBX1 PE=1 SV=3	324	35992.7		32	10	45.4	Oxidation (M)		2.98		12.9	4.96	10.92		7.331e-08		7.057e-07	2.42e-07	2.739e-07	Control2 Only		Sample1 Only	Sample2 Only	Sample3 Only
Q92973	TNPO1_HUMAN Transportin-1 OS=Homo sapiens GN=TNPO1 PE=1 SV=2	898	101496	Q92973-2;	32	13	16.1	Carbamidomethyl (C),Oxidation (M)	9.93	2.97	1.98	6.92		6.96	1.351e-07	2.041e-08	5.164e-09	5.633e-08		2.111e-08	0.151073	0.0382235	0.41695	Control1 Only	0.156255
B4E2W0	B4E2W0_HUMAN 3-ketoacyl-CoA thiolase OS=Homo sapiens GN=HADHB PE=2 SV=1	452	51387.6	P55084;	31	10	22.8	Oxidation (M)	2.97	1.97	3.95	17.8	0.99	2.97	1.13e-07	8.466e-08	3.226e-08	9.173e-07	3.941e-08	1.397e-08	0.749204	0.285487	8.1177	0.348761	0.123628
E9PFW3	E9PFW3_HUMAN AP-2 complex subunit mu OS=Homo sapiens GN=AP2M1 PE=2 SV=1	460	49484	Q96CW1;Q96CW1-2;	31	14	30.5	Oxidation (M)		2.97	0.99	14.91	1.98	4.97		5.272e-08	7.339e-09	1e-06	3.529e-08	6.282e-08	Control2 Only	Control3 Only	Sample1 Only	Sample2 Only	Sample3 Only
B0FLL2	B0FLL2_HUMAN 6-phosphofructo-2-kinase/fructose-2, 6-bisphosphatase 2 transcript variant 3 OS=Homo sapiens GN=PFKFB2 PE=2 SV=1	472	54497.7	O60825;O60825-2;	31	18	39.1	Carbamidomethyl (C),Gln->pyro-Glu (N-term Q),Oxidation (M)	14.88	1	3.96	5.94	4.96		3.487e-07	1.351e-08	1.872e-08	1.482e-07	1.609e-07		0.0387439	0.0536851	0.425007	0.461428	Control1 Only
P62906	RL10A_HUMAN 60S ribosomal protein L10a OS=Homo sapiens GN=RPL10A PE=1 SV=2	217	24869.6		30	11	44.7	Carbamidomethyl (C),Oxidation (M)		5	1	19	2	3		2.018e-07	6.299e-09	1.076e-06	8.965e-08	3.677e-08	Control2 Only	Control3 Only	Sample1 Only	Sample2 Only	Sample3 Only
B4DZI8	B4DZI8_HUMAN Coatomer protein complex, subunit beta 2 (Beta prime), isoform CRA_b OS=Homo sapiens GN=COPB2 PE=2 SV=1	877	102693	P35606;	30	11	14.8	Oxidation (M)			0.99	23.99	1	1.99			8.572e-10	2.001e-07	2.558e-09	2.948e-09		Control3 Only	Sample1 Only	Sample2 Only	Sample3 Only
CONT_PRDX1_HUMAN	Possible Contaminant PRDX1_HUMAN	199	22150.3	Q06830;	30	7	33.7		7	4.5	5.5		4.5	0.5	1.092e-06	3.107e-07	8.988e-08		3.23e-07	3.142e-09	0.284524	0.0823077	Control1 Only	0.295788	0.00287729
P21266	GSTM3_HUMAN Glutathione S-transferase Mu 3 OS=Homo sapiens GN=GSTM3 PE=1 SV=3	225	26596.2		30	9	39.1	Carbamidomethyl (C)	13.95	3.98	0.99	6.96	1.99		2.129e-06	2.742e-07	1.3e-08	1.634e-06	1.027e-07		0.128793	0.00610615	0.767496	0.0482386	Control1 Only
P62753	RS6_HUMAN 40S ribosomal protein S6 OS=Homo sapiens GN=RPS6 PE=1 SV=1	249	28735		30	10	35.3	Carbamidomethyl (C),Gln->pyro-Glu (N-term Q),Oxidation (M)	1			26.94	1		1.942e-08			4.188e-06	4.165e-08		Control1 Only	Control1 Only	215.654	2.1447	Control1 Only
P63244	GBLP_HUMAN Guanine nucleotide-binding protein subunit beta-2-like 1 OS=Homo sapiens GN=GNB2L1 PE=1 SV=3	317	35144.6		30	9	26.8	Carbamidomethyl (C)		1.94		9.68	5.81	10.63		6.027e-08		3.786e-07	2.083e-07	1.073e-07	Control2 Only		Sample1 Only	Sample2 Only	Sample3 Only
Q16822	PCKGM_HUMAN Phosphoenolpyruvate carboxykinase [GTP], mitochondrial OS=Homo sapiens GN=PCK2 PE=1 SV=3	640	70864.8		30	12	19.8	Carbamidomethyl (C),Glu->pyro-Glu (N-term E),Oxidation (M)	4.94	5.9	2.97	12.82		0.99	1.151e-07	8.852e-08	5.468e-09	3.755e-07		9.616e-10	0.76907	0.0475065	3.26238	Control1 Only	0.00835447
Q8NHQ1	CEP70_HUMAN Centrosomal protein of 70 kDa OS=Homo sapiens GN=CEP70 PE=1 SV=2	597	67632.9	Q8NHQ1-2;Q8NHQ1-4;Q8NHQ1-5;	30	9	15.2	Oxidation (M)	4.95	1.98	1.98	9.9	2.97	1.98	1.053e-07	1.698e-08	1.223e-08	2.662e-07	3.753e-08	1.045e-08	0.161254	0.116144	2.52802	0.35641	0.0992403
Q96CU9	FXRD1_HUMAN FAD-dependent oxidoreductase domain-containing protein 1 OS=Homo sapiens GN=FOXRED1 PE=1 SV=2	486	52197.7	Q96CU9-3;	30	8	15.9	Oxidation (M)	11.88	3.96	2.97	6.93		2.97	4.468e-07	9.256e-08	2.484e-08	1.886e-07		1.882e-08	0.207162	0.0555953	0.422113	Control1 Only	0.0421218
C9J2Y9	C9J2Y9_HUMAN DNA-directed RNA polymerase OS=Homo sapiens GN=POLR2B PE=2 SV=2	1167	134153	P30876;	29	23	20.9	Carbamidomethyl (C),Gln->pyro-Glu (N-term Q),Oxidation (M)		2	1	12		12.99		1.087e-08	8.21e-10	3.631e-08		1.907e-08	Control2 Only	Control3 Only	Sample1 Only		Sample3 Only
P39023	RL3_HUMAN 60S ribosomal protein L3 OS=Homo sapiens GN=RPL3 PE=1 SV=2	403	46187.8		29	9	16.6			0.99	1.97	15.85	1.98	6.93		3.085e-08	7.574e-09	8.775e-07	6.063e-08	8.691e-08	Control2 Only	Control3 Only	Sample1 Only	Sample2 Only	Sample3 Only
P01024	CO3_HUMAN Complement C3 OS=Homo sapiens GN=C3 PE=1 SV=2	1663	187516		29	28	18.6	Carbamidomethyl (C),Oxidation (M)	1	2			26		1.14e-08	7.134e-09			1.498e-07		0.625789	Control1 Only	Control1 Only	13.1404	Control1 Only
P62917	RL8_HUMAN 60S ribosomal protein L8 OS=Homo sapiens GN=RPL8 PE=1 SV=2	257	28079.3		29	9	28		0.99	3.94	0.99	9.89	3.95	7.89	3.777e-08	3.174e-07	8.846e-09	1.674e-06	3.046e-07	1.158e-07	8.40349	0.234207	44.3209	8.0646	3.06593
B3KXW5	B3KXW5_HUMAN AP-1 complex subunit gamma-1 OS=Homo sapiens GN=AP1G1 PE=2 SV=1	845	91527.3	O43747;	28	14	15.7	Carbamidomethyl (C),Oxidation (M)	3.96	5.94	1.98	7.91	4.95	0.99	2.731e-08	5.418e-08	1.737e-09	1.231e-07	3.973e-08	8.012e-10	1.98389	0.0636031	4.50751	1.45478	0.0293372
Q9P2R3	ANFY1_HUMAN Ankyrin repeat and FYVE domain-containing protein 1 OS=Homo sapiens GN=ANKFY1 PE=1 SV=2	1169	128747	Q9P2R3-2;	28	18	17.5	Acetyl (Protein N-term),Ammonia-loss (N-term C) + Carbamidomethyl (C),Carbamidomethyl (C),Oxidation (M)	1.98	4.99	10.99	7.97			4.508e-09	1.709e-08	1.144e-08	4.201e-08			3.79104	2.53771	9.31899	Control1 Only	Control1 Only
P16401	H15_HUMAN Histone H1.5 OS=Homo sapiens GN=HIST1H1B PE=1 SV=3	226	22620.5		27	9	36.3	Acetyl (Protein N-term)		17			9	1		1.402e-06			7.967e-07	7.656e-09	Control2 Only			Sample2 Only	Sample3 Only
B7Z817	B7Z817_HUMAN Delta(24)-sterol reductase OS=Homo sapiens GN=DHCR24 PE=2 SV=1	475	60206.1	Q15392;	27	6	9.1	Carbamidomethyl (C)	3.98	1	2	6.97	3.99	4.98	1.119e-07	1.642e-08	6.244e-09	3.127e-07	1.824e-07	2.463e-08	0.146738	0.0557998	2.79446	1.63003	0.220107
CONT_ALBU_BOVIN	Possible Contaminant ALBU_BOVIN	607	69428.5		27	22	29.3	Carbamidomethyl (C),Oxidation (M)		14	5		7	1		2.147e-07	2.082e-08		1.675e-07	1.487e-09	Control2 Only	Control3 Only		Sample2 Only	Sample3 Only
E7EX17	E7EX17_HUMAN Eukaryotic translation initiation factor 4B OS=Homo sapiens GN=EIF4B PE=2 SV=1	616	69290.4	P23588;	27	8	12.6		9.87	0.99	0.98	11.84	0.99	0.98	2.258e-07	5.036e-09	2.721e-09	3.28e-07	5.172e-09	7.866e-09	0.0223029	0.0120505	1.45261	0.0229052	0.0348361
M0QZC5	M0QZC5_HUMAN 40S ribosomal protein S11 OS=Homo sapiens GN=RPS11 PE=2 SV=1	118	18455	P62280;	27	11	67.8	Acetyl (Protein N-term),Carbamidomethyl (C)	1	2	1	15	5	3	1.475e-07	3.626e-07	2.323e-08	9.947e-06	5.541e-07	1.763e-07	2.45831	0.157492	67.4373	3.75661	1.19525
B0YJC4	B0YJC4_HUMAN Vimentin OS=Homo sapiens GN=VIM PE=2 SV=1	431	53745.2	P08670;	27	22	48.7	Oxidation (M)					26.86						7.984e-07					Sample2 Only
Q9Y6Q5	AP1M2_HUMAN AP-1 complex subunit mu-2 OS=Homo sapiens GN=AP1M2 PE=1 SV=4	423	48204.2		27	14	36.4	Oxidation (M)	0.98	2.97	1.98	13.82	2.97	3.94	1.105e-08	6.574e-08	2.355e-08	5.294e-07	1.061e-07	2.778e-08	5.94932	2.13122	47.9095	9.60181	2.51403
P17655	CAN2_HUMAN Calpain-2 catalytic subunit OS=Homo sapiens GN=CAPN2 PE=1 SV=6	700	71610.5	P17655-2;	26	10	13.2	Carbamidomethyl (C),Oxidation (M)	1	1		10	7	3	7.567e-09	1.063e-08		1.521e-07	9.504e-08	7.167e-09	1.40478	Control1 Only	20.1004	12.5598	0.947139
P33992	MCM5_HUMAN DNA replication licensing factor MCM5 OS=Homo sapiens GN=MCM5 PE=1 SV=5	734	82449.3		26	16	21.5	Carbamidomethyl (C),Gln->pyro-Glu (N-term Q)		4.99	2.99	16.96	0.99			4.756e-08	8.657e-09	3.416e-07	6.224e-09		Control2 Only	Control3 Only	Sample1 Only	Sample2 Only
J3QRS3	J3QRS3_HUMAN Myosin regulatory light chain 12A OS=Homo sapiens GN=MYL12A PE=2 SV=1	177	19817.5	O14950;P19105;	26	11	66.7	Carbamidomethyl (C),Oxidation (M)	5	7	3	4	2	5	5.583e-07	2.33e-06	1.572e-07	3.412e-07	3.682e-07	3.189e-07	4.17338	0.281569	0.611141	0.659502	0.571198
P62277	RS13_HUMAN 40S ribosomal protein S13 OS=Homo sapiens GN=RPS13 PE=1 SV=2	151	17247.7		26	8	48.3		1	2	1	15.96	3	1	1.17e-07	1.466e-07	7.634e-09	8.2e-06	2.924e-07	1.827e-08	1.25299	0.0652479	70.0855	2.49915	0.156154
P62701	RS4X_HUMAN 40S ribosomal protein S4, X isoform OS=Homo sapiens GN=RPS4X PE=1 SV=2	263	29651.1		26	11	38.8	Carbamidomethyl (C)	1	3		14.93	4	2.98	2.526e-08	1.522e-07		1.205e-06	1.587e-07	2.41e-08	6.02534	Control1 Only	47.7039	6.28266	0.954078
Q9BUF5	TBB6_HUMAN Tubulin beta-6 chain OS=Homo sapiens GN=TUBB6 PE=1 SV=1	446	49951.1		26	23	68.6	Carbamidomethyl (C),Oxidation (M)	0.99		0.99	3.98	10.98	8.95	1.308e-08		5.986e-09	8.722e-08	2.432e-07	4.87e-07	Control1 Only	0.457645	6.6682	18.5933	37.2324
Q9Y678	COPG1_HUMAN Coatomer subunit gamma-1 OS=Homo sapiens GN=COPG1 PE=1 SV=1	874	97907.6		26	12	15.2	Oxidation (M)	4.99	1	1	14.98	2		8.024e-08	4.348e-09	1.888e-09	2.808e-07	3.258e-08		0.0541874	0.0235294	3.4995	0.406032	Control1 Only
P62241	RS8_HUMAN 40S ribosomal protein S8 OS=Homo sapiens GN=RPS8 PE=1 SV=2	208	21920	Q5JR95;	25	8	48.4	Carbamidomethyl (C)				24						2.156e-06					Sample1 Only
P42025	ACTY_HUMAN Beta-centractin OS=Homo sapiens GN=ACTR1B PE=1 SV=1	376	42374.8		25	9	27.1	Carbamidomethyl (C),Oxidation (M)	1.5	4.5	2.5	2	1.5	0.5	5.095e-08	2.015e-07	3.129e-08	7.835e-08	4.199e-08	6.785e-09	3.95486	0.614132	1.53778	0.824141	0.13317
Q8TDL5	BPIB1_HUMAN BPI fold-containing family B member 1 OS=Homo sapiens GN=BPIFB1 PE=2 SV=1	484	52552.6		25	14	38.4	Oxidation (M)		1			23			6.165e-09			7.694e-07		Control2 Only			Sample2 Only
Q9Y265	RUVB1_HUMAN RuvB-like 1 OS=Homo sapiens GN=RUVBL1 PE=1 SV=1	456	50322.4		25	14	40.8	Carbamidomethyl (C),Oxidation (M)		5.94	1		4.95	11.91		8.076e-08	5.386e-09		7.95e-08	1.954e-07	Control2 Only	Control3 Only		Sample2 Only	Sample3 Only
CONT_CATG_HUMAN	Possible Contaminant CATG_HUMAN	255	28891.1	P08311;	24	9	36.1	Carbamidomethyl (C),Oxidation (M)					24						2.425e-06					Sample2 Only
P06733	ENOA_HUMAN Alpha-enolase OS=Homo sapiens GN=ENO1 PE=1 SV=2	434	47265.4		24	16	42.4	Carbamidomethyl (C),Oxidation (M)		1.98			21.93			2.11e-08			8.622e-07		Control2 Only			Sample2 Only
J3KN39	J3KN39_HUMAN NACHT, LRR and PYD domains-containing protein 2 OS=Homo sapiens GN=NLRP2 PE=2 SV=1	1059	118113	Q9NX02;Q9NX02-2;Q9NX02-4;Q9NX02-5;	24	9	8.8		3.97	2.97	2.97	13.88			1.003e-08	1.191e-08	3.434e-09	8.021e-08			1.18744	0.342373	7.99701	Control1 Only	Control1 Only
P00738	HPT_HUMAN Haptoglobin OS=Homo sapiens GN=HP PE=1 SV=1	406	45284.6		24	15	37.9	Carbamidomethyl (C),Oxidation (M)		3.94			18.72			3.506e-08			8.147e-07		Control2 Only			Sample2 Only
P04083	ANXA1_HUMAN Annexin A1 OS=Homo sapiens GN=ANXA1 PE=1 SV=2	346	38780		24	15	50.6			1			22.92			1.013e-08			2.335e-06		Control2 Only			Sample2 Only
Q8TEX9	IPO4_HUMAN Importin-4 OS=Homo sapiens GN=IPO4 PE=1 SV=2	1081	119150	Q8TEX9-2;	24	11	10.7	Carbamidomethyl (C),Oxidation (M)	8.88	0.99		9.86		1.96	4.657e-08	4.584e-09		8.043e-08		1.975e-09	0.0984325	Control1 Only	1.72708	Control1 Only	0.0424093
P30050	RL12_HUMAN 60S ribosomal protein L12 OS=Homo sapiens GN=RPL12 PE=1 SV=1	165	17843.6		23	7	52.7	Carbamidomethyl (C),Gln->pyro-Glu (N-term Q)		3	1	5	4	5		2.397e-07	8.996e-10	9.887e-07	4.188e-07	1.207e-07	Control2 Only	Control3 Only	Sample1 Only	Sample2 Only	Sample3 Only
H0Y4R1	H0Y4R1_HUMAN Inosine-5'-monophosphate dehydrogenase 2 (Fragment) OS=Homo sapiens GN=IMPDH2 PE=3 SV=1	470	55913.7	P12268;	23	14	31.9	Oxidation (M)	1.99	15.98	4.99				8.509e-08	4.929e-07	5.032e-08				5.79269	0.591374	Control1 Only	Control1 Only	Control1 Only
O00743	PPP6_HUMAN Serine/threonine-protein phosphatase 6 catalytic subunit OS=Homo sapiens GN=PPP6C PE=1 SV=1	305	39011.5	O00743-2;O00743-3;	23	6	20.8		5	1		9	2	4	2.139e-07	3.567e-08		4.703e-07	7.594e-08	2.374e-08	0.16676	Control1 Only	2.19869	0.355026	0.110986
P62269	RS18_HUMAN 40S ribosomal protein S18 OS=Homo sapiens GN=RPS18 PE=1 SV=3	152	17743.9		23	12	46.1	Oxidation (M)		1		16	4	1		1.184e-07		8.293e-06	3.266e-07	4.686e-09	Control2 Only		Sample1 Only	Sample2 Only	Sample3 Only
Q9H9G7	AGO3_HUMAN Protein argonaute-3 OS=Homo sapiens GN=AGO3 PE=1 SV=2	860	97550.1		23	11	14	Carbamidomethyl (C),Oxidation (M)				3	15	5				4.043e-07	2.486e-06	1.487e-07			Sample1 Only	Sample2 Only	Sample3 Only
P12273	PIP_HUMAN Prolactin-inducible protein OS=Homo sapiens GN=PIP PE=1 SV=1	146	16597.8		22	5	42.5	Carbamidomethyl (C)		10			12			5.802e-07			2.075e-06		Control2 Only			Sample2 Only
Q9BRS2	RIOK1_HUMAN Serine/threonine-protein kinase RIO1 OS=Homo sapiens GN=RIOK1 PE=1 SV=2	568	65703.8		22	8	13.9	Oxidation (M)	6	1	3	9		2	1.542e-07	5.542e-09	2.844e-08	3.182e-07		1.172e-08	0.0359403	0.184436	2.06355	Control1 Only	0.0760052
B4E022	B4E022_HUMAN Transketolase OS=Homo sapiens GN=TKT PE=2 SV=1	576	68950.2	P29401;P29401-2;	22	15	34.5			1			19.99			6.75e-10			3.568e-07		Control2 Only			Sample2 Only
P17987	TCPA_HUMAN T-complex protein 1 subunit alpha OS=Homo sapiens GN=TCP1 PE=1 SV=1	556	60467.7		22	12	23.4	Carbamidomethyl (C)	2.97	1	1	13.88	1	0.99	3.056e-08	1.257e-08	2.036e-09	2.333e-07	1.398e-08	1.747e-09	0.411322	0.066623	7.63416	0.457461	0.0571662
O95163	ELP1_HUMAN Elongator complex protein 1 OS=Homo sapiens GN=IKBKAP PE=1 SV=3	1332	150555		22	16	14.3	Carbamidomethyl (C)	1	1		13	2	4	3.304e-09	2.492e-09		6.526e-08	7.34e-09	5.923e-09	0.754237	Control1 Only	19.7518	2.22155	1.79268
O95347	SMC2_HUMAN Structural maintenance of chromosomes protein 2 OS=Homo sapiens GN=SMC2 PE=1 SV=2	1197	125173	O95347-2;	22	18	17.4	Oxidation (M)				19						7.711e-08					Sample1 Only
P04259	K2C6B_HUMAN Keratin, type II cytoskeletal 6B OS=Homo sapiens GN=KRT6B PE=1 SV=5	564	60192.4		22	46	63.3	Acetyl (Protein N-term),Carbamidomethyl (C),Gln->pyro-Glu (N-term Q),Glu->pyro-Glu (N-term E),Oxidation (M)		12	2		5	3		3.658e-07	3.43e-09		1.147e-07	8.76e-09	Control2 Only	Control3 Only		Sample2 Only	Sample3 Only
Q16401	PSMD5_HUMAN 26S proteasome non-ATPase regulatory subunit 5 OS=Homo sapiens GN=PSMD5 PE=1 SV=3	504	51405.8	Q16401-2;	22	9	20.6	Acetyl (Protein N-term)	5	5	4	5		1	1.274e-07	5.991e-08	2.416e-08	1.843e-07		3.838e-09	0.470251	0.189639	1.44662	Control1 Only	0.0301256
Q9H4Y5	GSTO2_HUMAN Glutathione S-transferase omega-2 OS=Homo sapiens GN=GSTO2 PE=1 SV=1	243	24437.2	Q9H4Y5-2;	22	7	34.9	Carbamidomethyl (C)	0.98	4.92	3.94	1.97	4.92	4.92	4.612e-08	3.643e-07	7.22e-08	7.627e-08	3.21e-07	1.635e-07	7.89896	1.56548	1.65373	6.9601	3.5451
Q9Y6D6	BIG1_HUMAN Brefeldin A-inhibited guanine nucleotide-exchange protein 1 OS=Homo sapiens GN=ARFGEF1 PE=1 SV=2	1849	209175		22	16	9.3	Carbamidomethyl (C),Oxidation (M)	3.97		1.98	6.94		7.93	5.792e-09		7.364e-10	1.76e-08		7.818e-09	Control1 Only	0.127141	3.03867	Control1 Only	1.34979
Q5T749	KPRP_HUMAN Keratinocyte proline-rich protein OS=Homo sapiens GN=KPRP PE=1 SV=1	579	64255.3		21	6	8.8	Carbamidomethyl (C)		5	7		4	4		3.848e-08	3.501e-08		3.151e-08	1.62e-08	Control2 Only	Control3 Only		Sample2 Only	Sample3 Only
P43490	NAMPT_HUMAN Nicotinamide phosphoribosyltransferase OS=Homo sapiens GN=NAMPT PE=1 SV=1	491	55630.7		21	9	17.1	Carbamidomethyl (C)	1	3	2	2.99		9.98	1.556e-08	3.886e-08	9.014e-09	4.621e-08		7.587e-08	2.49743	0.579306	2.96979	Control1 Only	4.87596
P19013	K2C4_HUMAN Keratin, type II cytoskeletal 4 OS=Homo sapiens GN=KRT4 PE=1 SV=4	534	57393.9		21	22	34.1	Carbamidomethyl (C),Oxidation (M)		4.96	2.99	6.94	4.97			4.369e-08	1.131e-08	4.569e-08	6.77e-08		Control2 Only	Control3 Only	Sample1 Only	Sample2 Only
Q6DD88	ATLA3_HUMAN Atlastin-3 OS=Homo sapiens GN=ATL3 PE=1 SV=1	541	60665.5		21	8	18.1	Oxidation (M)	0.99	3.96	5.94	4.95		4.96	8.087e-09	9.015e-08	2.679e-08	9.519e-08		3.523e-08	11.1475	3.31272	11.7707	Control1 Only	4.35637
Q93008	USP9X_HUMAN Probable ubiquitin carboxyl-terminal hydrolase FAF-X OS=Homo sapiens GN=USP9X PE=1 SV=3	2570	291034	Q93008-1;	21	10	3.8		3.98	1	4.98	7.98		2	5.682e-09	2.138e-09	2.67e-09	1.286e-08		2.931e-09	0.376276	0.469905	2.26329	Control1 Only	0.515839
B4DWW4	B4DWW4_HUMAN DNA replication licensing factor MCM3 OS=Homo sapiens GN=MCM3 PE=2 SV=1	853	91158.2	P25205;	20	11	14		7.99			8.99			3.052e-08			5.826e-08			Control1 Only	Control1 Only	1.90891	Control1 Only	Control1 Only
P13796	PLSL_HUMAN Plastin-2 OS=Homo sapiens GN=LCP1 PE=1 SV=6	627	70424		20	17	30.5	Carbamidomethyl (C)					19.95						3.793e-07					Sample2 Only
H0Y368	H0Y368_HUMAN Dolichol-phosphate mannosyltransferase (Fragment) OS=Homo sapiens GN=DPM1 PE=4 SV=1	295	32478.1	O60762;Q5QPK2;	20	6	30.4	Oxidation (M)		5.95	0.99	0.99	6.94	3.96		3.838e-07	4.848e-09	3.02e-08	4.568e-07	5.725e-08	Control2 Only	Control3 Only	Sample1 Only	Sample2 Only	Sample3 Only
H7BXW3	H7BXW3_HUMAN Melanoma-associated antigen D2 OS=Homo sapiens GN=MAGED2 PE=2 SV=1	588	63290.5	Q5H909;Q9UNF1;Q9UNF1-2;	20	14	25.3			5	1	10	2	2		7.993e-08	8.512e-09	1.983e-07	2.735e-08	1.648e-08	Control2 Only	Control3 Only	Sample1 Only	Sample2 Only	Sample3 Only
O75083	WDR1_HUMAN WD repeat-containing protein 1 OS=Homo sapiens GN=WDR1 PE=1 SV=4	606	66332		20	12	23.9	Carbamidomethyl (C)		1.98		13.94	2.98			3.397e-08		4.529e-07	5.382e-08		Control2 Only		Sample1 Only	Sample2 Only
P51659	DHB4_HUMAN Peroxisomal multifunctional enzyme type 2 OS=Homo sapiens GN=HSD17B4 PE=1 SV=3	736	79852.4		20	8	14.3		4.96	0.99	5.92	1.98		5.94	4.304e-08	9.029e-09	2.91e-08	3.827e-08		3.176e-08	0.209782	0.676115	0.889173	Control1 Only	0.737918
P02647	APOA1_HUMAN Apolipoprotein A-I OS=Homo sapiens GN=APOA1 PE=1 SV=1	267	30831		20	16	50.2	Oxidation (M)		1			18			9.601e-09			1.159e-06		Control2 Only			Sample2 Only
Q562R1	ACTBL_HUMAN Beta-actin-like protein 2 OS=Homo sapiens GN=ACTBL2 PE=1 SV=2	376	42084		20	13	27.1	Ammonia-loss (N-term C) + Carbamidomethyl (C),Carbamidomethyl (C),Oxidation (M)	3	2	2	4	1	3	1.079e-07	8.768e-08	1.934e-06	1.563e-06	3.215e-08	7.254e-08	0.812604	17.924	14.4856	0.297961	0.672289
Q08J23	NSUN2_HUMAN tRNA (cytosine(34)-C(5))-methyltransferase OS=Homo sapiens GN=NSUN2 PE=1 SV=2	767	82556.9	Q08J23-2;	20	11	16.7	Carbamidomethyl (C),Oxidation (M)				17	2					2.744e-07	8.051e-08				Sample1 Only	Sample2 Only
Q5T4S7	UBR4_HUMAN E3 ubiquitin-protein ligase UBR4 OS=Homo sapiens GN=UBR4 PE=1 SV=1	5183	574790	Q5T4S7-2;Q5T4S7-3;Q5T4S7-4;	20	20	3.5	Carbamidomethyl (C),Oxidation (M)		3.5	2.5	3	0.5	2.99		1.556e-09	4.197e-10	1.364e-09	2.598e-10	9.072e-10	Control2 Only	Control3 Only	Sample1 Only	Sample2 Only	Sample3 Only
Q9NZB2	F120A_HUMAN Constitutive coactivator of PPAR-gamma-like protein 1 OS=Homo sapiens GN=FAM120A PE=1 SV=2	1118	125535	Q9NZB2-6;	20	15	18	Carbamidomethyl (C),Gln->pyro-Glu (N-term Q)	1.98			16.91			6.402e-09			9.023e-08			Control1 Only	Control1 Only	14.094	Control1 Only	Control1 Only
Q9P2M7	CING_HUMAN Cingulin OS=Homo sapiens GN=CGN PE=1 SV=2	1197	136646		20	16	11.5		6.99	7.98		1.99	0.99	1	2.411e-08	2.431e-08		4.051e-09	1.666e-09	1.301e-09	1.0083	Control1 Only	0.168022	0.0691	0.053961
Q9Y230	RUVB2_HUMAN RuvB-like 2 OS=Homo sapiens GN=RUVBL2 PE=1 SV=3	463	51250.6		20	14	32.2	Oxidation (M)			0.99			18.86			8.557e-09			3.386e-07		Control3 Only			Sample3 Only
B4DER1	B4DER1_HUMAN Leucine--tRNA ligase, cytoplasmic OS=Homo sapiens GN=LARS PE=2 SV=1	1149	134722	F5H698;Q9P2J5;	19	14	13.5	Oxidation (M)		12	6					3.507e-08	6.136e-09				Control2 Only	Control3 Only
B9EGP5	B9EGP5_HUMAN MON2 protein OS=Homo sapiens GN=MON2 PE=2 SV=1	1711	190742	F8VWA6;F8W1Z6;Q7Z3U7;Q7Z3U7-2;Q7Z3U7-4;	19	10	6.6		3	1		8.99	2	3	6.633e-09	2.136e-09		2.25e-08	5.638e-09	2.862e-09	0.322026	Control1 Only	3.39213	0.849992	0.431479
E5KLJ5	E5KLJ5_HUMAN Dynamin-like 120 kDa protein, mitochondrial OS=Homo sapiens GN=OPA1 PE=2 SV=1	1015	116100	E5KLJ6;E5KLJ9;E5KLK1;O60313;O60313-2;	19	10	10.6		3	6	2	7			1.313e-08	1.88e-08	3.624e-09	4.346e-08			1.43184	0.276009	3.30998	Control1 Only	Control1 Only
E9PEZ1	E9PEZ1_HUMAN Cullin-9 OS=Homo sapiens GN=CUL9 PE=2 SV=1	2489	268911	Q8IWT3;Q8IWT3-3;	19	12	5.3	Oxidation (M)				1	7	11				1.281e-09	2.416e-08	6.181e-09			Sample1 Only	Sample2 Only	Sample3 Only
P40429	RL13A_HUMAN 60S ribosomal protein L13a OS=Homo sapiens GN=RPL13A PE=1 SV=2	203	23616.4		19	6	27.6	Acetyl (Protein N-term),Oxidation (M)		2	1	5.98	2.99	3.98		1.317e-07	4.589e-09	5.472e-07	1.717e-07	7.516e-08	Control2 Only	Control3 Only	Sample1 Only	Sample2 Only	Sample3 Only
P05141	ADT2_HUMAN ADP/ATP translocase 2 OS=Homo sapiens GN=SLC25A5 PE=1 SV=7	298	32903.2		19	12	35.2	Acetyl (Protein N-term),Gln->pyro-Glu (N-term Q),Oxidation (M)	4	2		4	4	5	2.037e-07	1.111e-07		2.124e-07	2.4e-07	1.318e-07	0.54541	Control1 Only	1.04271	1.1782	0.64703
Q02413	DSG1_HUMAN Desmoglein-1 OS=Homo sapiens GN=DSG1 PE=1 SV=2	1049	113982		19	10	14.3	Oxidation (M)		9	7		3			4.472e-08	1.088e-08		2.058e-08		Control2 Only	Control3 Only		Sample2 Only
Q02878	RL6_HUMAN 60S ribosomal protein L6 OS=Homo sapiens GN=RPL6 PE=1 SV=3	288	32779.7		19	8	25.7			2.98		7.96	1	3.98		7.605e-08		3.492e-07	1.736e-08	4.826e-08	Control2 Only		Sample1 Only	Sample2 Only	Sample3 Only
E7EPB3	E7EPB3_HUMAN 60S ribosomal protein L14 OS=Homo sapiens GN=RPL14 PE=2 SV=1	124	23471	P50914;	18	3	28.2	Carbamidomethyl (C)		2	2	4	2	6		3.404e-07	6.29e-08	2.23e-06	1.504e-07	3.609e-07	Control2 Only	Control3 Only	Sample1 Only	Sample2 Only	Sample3 Only
P01857	IGHG1_HUMAN Ig gamma-1 chain C region OS=Homo sapiens GN=IGHG1 PE=1 SV=1	330	36173.2		18	12	52.4	Carbamidomethyl (C),Oxidation (M)		3			10.5			5.991e-08			1.595e-06		Control2 Only			Sample2 Only
P07737	PROF1_HUMAN Profilin-1 OS=Homo sapiens GN=PFN1 PE=1 SV=2	140	15080.6		18	10	73.6	Ammonia-loss (N-term C) + Carbamidomethyl (C),Carbamidomethyl (C),Oxidation (M)					16.99						2.354e-06					Sample2 Only
P0CG05	LAC2_HUMAN Ig lambda-2 chain C regions OS=Homo sapiens GN=IGLC2 PE=1 SV=1	106	11248.5	P0CG06;	18	4	55.7	Carbamidomethyl (C)		3			11.92			1.436e-07			2.981e-06		Control2 Only			Sample2 Only
B9ZVX0	B9ZVX0_HUMAN Diaphanous homolog 1 (Drosophila), isoform CRA_a OS=Homo sapiens GN=DIAPH1 PE=2 SV=1	1248	140578	E7ERW8;E7ET75;E9PEZ3;E9PHQ0;H9KV28;O60610;O60610-2;O60610-3;	18	10	8.2	Oxidation (M)	1	1		16			3.147e-09	3.574e-09		7.07e-08			1.13568	Control1 Only	22.4658	Control1 Only	Control1 Only
O15269	SPTC1_HUMAN Serine palmitoyltransferase 1 OS=Homo sapiens GN=SPTLC1 PE=1 SV=1	473	52836.5		18	11	24.5	Carbamidomethyl (C),Oxidation (M)		1	4	3	1	8		1.836e-08	2.576e-08	4.792e-08	1.395e-08	5.941e-08	Control2 Only	Control3 Only	Sample1 Only	Sample2 Only	Sample3 Only
P56192	SYMC_HUMAN Methionine--tRNA ligase, cytoplasmic OS=Homo sapiens GN=MARS PE=1 SV=2	900	101304		18	11	13.6	Carbamidomethyl (C),Oxidation (M)	0.99	2.98	0.99	4.97	1	6.93	4.143e-09	3.038e-08	4.833e-10	2.664e-08	6.102e-09	1.391e-08	7.33285	0.116655	6.43012	1.47285	3.35747
Q07960	RHG01_HUMAN Rho GTPase-activating protein 1 OS=Homo sapiens GN=ARHGAP1 PE=1 SV=1	439	50530.3		18	10	31	Carbamidomethyl (C),Oxidation (M)		8.97	1.99	5.97				1.161e-07	9.343e-09	1.109e-07			Control2 Only	Control3 Only	Sample1 Only
P59665	DEF1_HUMAN Neutrophil defensin 1 OS=Homo sapiens GN=DEFA1 PE=1 SV=1	94	10256.2	P59666;	17	3	20.2	Carbamidomethyl (C)		4	1		11			4.472e-07	1.138e-08		3.685e-05		Control2 Only	Control3 Only		Sample2 Only
Q92538	GBF1_HUMAN Golgi-specific brefeldin A-resistance guanine nucleotide exchange factor 1 OS=Homo sapiens GN=GBF1 PE=1 SV=2	1859	206855		17	10	6.4		3	1	1	5		6	3.372e-09	9.936e-10	6.772e-10	7.985e-09		5.785e-09	0.294662	0.20083	2.36803	Control1 Only	1.7156
P12429	ANXA3_HUMAN Annexin A3 OS=Homo sapiens GN=ANXA3 PE=1 SV=3	323	36442.7		17	14	47.7	Acetyl (Protein N-term),Oxidation (M)					16.88						8.527e-07					Sample2 Only
P17980	PRS6A_HUMAN 26S protease regulatory subunit 6A OS=Homo sapiens GN=PSMC3 PE=1 SV=3	439	47448.6	R4GNH3;	17	11	31.4	Oxidation (M)	2.97	4.91		6.89		0.98	1.505e-07	8.92e-08		3.014e-07		6.814e-09	0.592691	Control1 Only	2.00266	Control1 Only	0.0452757
D3DQ30	D3DQ30_HUMAN HCG40295, isoform CRA_d OS=Homo sapiens GN=TTC39A PE=2 SV=1	550	65851.1	G3XAF8;Q5SRH9-4;Q5SRH9-5;	17	10	24.7	Carbamidomethyl (C),Oxidation (M)		2.97		3.96	4.95	4.94		3.245e-08		9.99e-08	7.256e-08	5.567e-08	Control2 Only		Sample1 Only	Sample2 Only	Sample3 Only
P24752	THIL_HUMAN Acetyl-CoA acetyltransferase, mitochondrial OS=Homo sapiens GN=ACAT1 PE=1 SV=1	427	45296.7		17	12	30.7	Carbamidomethyl (C),Oxidation (M)		3	2	11.96				4.871e-08	1.113e-08	2.781e-07			Control2 Only	Control3 Only	Sample1 Only
Q96DA0	ZG16B_HUMAN Zymogen granule protein 16 homolog B OS=Homo sapiens GN=ZG16B PE=1 SV=3	208	22778.6		17	7	49	Oxidation (M)		2			15			5.195e-08			2.758e-06		Control2 Only			Sample2 Only
E9PG35	E9PG35_HUMAN Methylcrotonoyl-CoA carboxylase subunit alpha, mitochondrial (Fragment) OS=Homo sapiens GN=MCCC1 PE=2 SV=1	598	80638.1	E9PHF7;Q96RQ3;	16	8	13.4	Carbamidomethyl (C),Oxidation (M)	0.99	4.96	0.99	2.98		3.97	1.625e-08	1.324e-07	7.258e-09	4.457e-08		2.43e-08	8.14769	0.446646	2.74277	Control1 Only	1.49538
P46777	RL5_HUMAN 60S ribosomal protein L5 OS=Homo sapiens GN=RPL5 PE=1 SV=3	297	34412.7		16	6	19.2	Carbamidomethyl (C),Oxidation (M)			1	8	2	4			6.851e-09	3.532e-07	4.952e-08	5.848e-08		Control3 Only	Sample1 Only	Sample2 Only	Sample3 Only
O43592	XPOT_HUMAN Exportin-T OS=Homo sapiens GN=XPOT PE=1 SV=2	962	110181		16	10	11.5	Carbamidomethyl (C),Oxidation (M)	3	3		1	3	6	1.805e-08	1.887e-08		4.229e-09	1.7e-08	1.037e-08	1.04543	Control1 Only	0.234294	0.941828	0.574515
P61353	RL27_HUMAN 60S ribosomal protein L27 OS=Homo sapiens GN=RPL27 PE=1 SV=2	136	15823.8		16	4	27.9			4	1	4	4	3		4.905e-07	2.238e-08	8.99e-07	4.794e-07	8.241e-08	Control2 Only	Control3 Only	Sample1 Only	Sample2 Only	Sample3 Only
Q14247	SRC8_HUMAN Src substrate cortactin OS=Homo sapiens GN=CTTN PE=1 SV=2	550	57575.6	Q14247-2;Q14247-3;	16	11	22.2		3			13			3.469e-08			2.092e-07			Control1 Only	Control1 Only	6.03056	Control1 Only	Control1 Only
Q9Y6D5	BIG2_HUMAN Brefeldin A-inhibited guanine nucleotide-exchange protein 2 OS=Homo sapiens GN=ARFGEF2 PE=1 SV=3	1785	202431		16	13	6.9	Carbamidomethyl (C),Gln->pyro-Glu (N-term Q)	1	1		8	1	4.5	5.087e-09	1.867e-09		2.429e-08	3.693e-09	3.734e-09	0.367014	Control1 Only	4.77492	0.725968	0.734028
K7EQG1	K7EQG1_HUMAN Glutaminyl-peptide cyclotransferase-like protein (Fragment) OS=Homo sapiens GN=QPCTL PE=2 SV=1	121	43005.2	Q9NXS2;	15	2	18.2		2	2	2	4	2	3	1.281e-07	6.952e-08	3.015e-08	3.158e-07	9.918e-08	4.886e-08	0.542701	0.235363	2.46526	0.774239	0.381421
G8JLH9	G8JLH9_HUMAN Signal transducer and activator of transcription OS=Homo sapiens GN=STAT3 PE=2 SV=1	672	88140.5	K7ENL3;P40763;P40763-2;	15	8	14.7		2	4		2		2	1.995e-08	3.365e-08		4.781e-08		8.683e-09	1.68672	Control1 Only	2.39649	Control1 Only	0.435238
P12004	PCNA_HUMAN Proliferating cell nuclear antigen OS=Homo sapiens GN=PCNA PE=1 SV=1	261	28822.3		15	7	26.8	Carbamidomethyl (C)		1	2		3	6		4.22e-08	1.504e-08		1.064e-07	1.104e-07	Control2 Only	Control3 Only		Sample2 Only	Sample3 Only
Q5D862	FILA2_HUMAN Filaggrin-2 OS=Homo sapiens GN=FLG2 PE=1 SV=1	2391	248630		15	3	1.4	Carbamidomethyl (C)		5	4	1	1	3		1.133e-08	1.218e-08	1.873e-09	5.358e-09	2.113e-09	Control2 Only	Control3 Only	Sample1 Only	Sample2 Only	Sample3 Only
Q9NP55	BPIA1_HUMAN BPI fold-containing family A member 1 OS=Homo sapiens GN=BPIFA1 PE=1 SV=1	256	26768		15	4	19.5			5			10			8.927e-08			3.247e-07		Control2 Only			Sample2 Only
B4E0X2	B4E0X2_HUMAN RAF proto-oncogene serine/threonine-protein kinase OS=Homo sapiens GN=RAF1 PE=2 SV=1	567	75545.2	B4E1N6;H7C155;P04049;P04049-2;	15	14	32.8	Carbamidomethyl (C),Oxidation (M)				3.5	3	4.5				4.817e-08	4.27e-08	2.923e-08			Sample1 Only	Sample2 Only	Sample3 Only
E9PMI6	E9PMI6_HUMAN Methylosome subunit pICln OS=Homo sapiens GN=CLNS1A PE=2 SV=1	167	26252.9	J3KN38;P54105;	15	5	44.3	Carbamidomethyl (C)	7.99	1	2	3		1	1.866e-06	3.328e-07	8.843e-08	9.582e-07		6.525e-08	0.178349	0.0473901	0.513505	Control1 Only	0.0349678
F5H2F4	F5H2F4_HUMAN C-1-tetrahydrofolate synthase, cytoplasmic OS=Homo sapiens GN=MTHFD1 PE=2 SV=1	1020	101765	P11586;	15	8	9.5		1	5	4	1	2	1	4.263e-09	4.263e-08	3.839e-09	1.78e-09	7.145e-09	1.226e-09	10	0.90054	0.417546	1.67605	0.287591
O75367	H2AY_HUMAN Core histone macro-H2A.1 OS=Homo sapiens GN=H2AFY PE=1 SV=4	372	39572.4	O75367-2;O75367-3;	15	7	22.5			13.9			1			4.373e-07			1.927e-08		Control2 Only			Sample2 Only
P02675	FIBB_HUMAN Fibrinogen beta chain OS=Homo sapiens GN=FGB PE=1 SV=2	491	56036.3		15	11	26.3	Carbamidomethyl (C)					15						4.44e-07					Sample2 Only
P61313	RL15_HUMAN 60S ribosomal protein L15 OS=Homo sapiens GN=RPL15 PE=1 SV=2	204	24185.1		15	5	26	Gln->pyro-Glu (N-term Q)	0.99	0.99		7.9	0.99	1.99	2.61e-08	2.365e-08		1.075e-06	4.607e-08	2.883e-08	0.90613	Control1 Only	41.1877	1.76513	1.1046
Q5T4S7-5	UBR4_HUMAN Isoform 5 of E3 ubiquitin-protein ligase UBR4 OS=Homo sapiens GN=UBR4	2456	271288		15	12	4.6	Carbamidomethyl (C),Oxidation (M)		1.5	1.5	3	0.5	1		1.477e-09	5.836e-10	2.878e-09	5.482e-10	7.6e-10	Control2 Only	Control3 Only	Sample1 Only	Sample2 Only	Sample3 Only
Q9Y3Z3	SAMH1_HUMAN Deoxynucleoside triphosphate triphosphohydrolase SAMHD1 OS=Homo sapiens GN=SAMHD1 PE=1 SV=2	626	68240.9	Q9Y3Z3-4;	15	9	15.9	Oxidation (M)		0.99		3.96	2.97	5.94		1.25e-08		5.226e-08	5.582e-08	3.75e-08	Control2 Only		Sample1 Only	Sample2 Only	Sample3 Only
C9JNW5	C9JNW5_HUMAN 60S ribosomal protein L24 OS=Homo sapiens GN=RPL24 PE=2 SV=1	150	17803.9	C9JXB8;P83731;	14	4	29.8	Carbamidomethyl (C)		1		8	1	2		7.508e-08		1.852e-06	7.298e-08	2.657e-08	Control2 Only		Sample1 Only	Sample2 Only	Sample3 Only
C9JC84	C9JC84_HUMAN Fibrinogen gamma chain OS=Homo sapiens GN=FGG PE=2 SV=1	461	49591	C9JEU5;P02679;P02679-2;	14	10	28.8	Gln->pyro-Glu (N-term Q),Oxidation (M)					14						4.732e-07					Sample2 Only
F8W7C6	F8W7C6_HUMAN 60S ribosomal protein L10 OS=Homo sapiens GN=RPL10 PE=2 SV=1	163	24641.9	P27635;	14	7	38	Carbamidomethyl (C)		1.99		7.95	1.99	1.99		1.168e-07		1.479e-06	1.64e-07	4.194e-08	Control2 Only		Sample1 Only	Sample2 Only	Sample3 Only
M0R117	M0R117_HUMAN 60S ribosomal protein L18a OS=Homo sapiens GN=RPL18A PE=2 SV=1	154	20784.9	M0R1A7;M0R3D6;Q02543;	14	6	39.7	Carbamidomethyl (C)		2		6	1	2		2.251e-07		8.624e-07	1.154e-07	8.761e-08	Control2 Only		Sample1 Only	Sample2 Only	Sample3 Only
O14980	XPO1_HUMAN Exportin-1 OS=Homo sapiens GN=XPO1 PE=1 SV=1	1071	123612		14	8	9	Oxidation (M)	6			6		1	2.521e-08			2.645e-08		3.124e-09	Control1 Only	Control1 Only	1.04919	Control1 Only	0.123919
P49748	ACADV_HUMAN Very long-chain specific acyl-CoA dehydrogenase, mitochondrial OS=Homo sapiens GN=ACADVL PE=1 SV=1	655	73078.8	P49748-2;P49748-3;	14	8	14.5	Oxidation (M)	2	5.96	3.96	0.99			1.086e-08	6.647e-08	1.318e-08	1.153e-08			6.12063	1.21363	1.06169	Control1 Only	Control1 Only
Q13263	TIF1B_HUMAN Transcription intermediary factor 1-beta OS=Homo sapiens GN=TRIM28 PE=1 SV=5	835	79639.6	Q13263-2;	14	8	12.9	Oxidation (M)		1	1	5		5		5.583e-09	2.044e-07	5.664e-08		1.75e-08	Control2 Only	Control3 Only	Sample1 Only		Sample3 Only
Q9UBV2	SE1L1_HUMAN Protein sel-1 homolog 1 OS=Homo sapiens GN=SEL1L PE=1 SV=3	794	88932.6		14	6	9.3		1	2		6	2	1	5.057e-09	1.543e-08		7.344e-08	2.184e-08	1.073e-09	3.05122	Control1 Only	14.5224	4.31877	0.212181
B4DVY1	B4DVY1_HUMAN Eukaryotic translation initiation factor 3 subunit D OS=Homo sapiens GN=EIF3D PE=2 SV=1	499	64094.5	O15371;	13	6	12.6	Carbamidomethyl (C)		1	1	8.98				5.433e-09	1.4e-09	2.371e-07			Control2 Only	Control3 Only	Sample1 Only
E5RI99	E5RI99_HUMAN 60S ribosomal protein L30 (Fragment) OS=Homo sapiens GN=RPL30 PE=2 SV=1	114	12793.8	P62888;	13	5	58.8	Carbamidomethyl (C)		2		3	2	5		1.861e-07		5.814e-07	3.178e-07	2.073e-07	Control2 Only		Sample1 Only	Sample2 Only	Sample3 Only
P24928	RPB1_HUMAN DNA-directed RNA polymerase II subunit RPB1 OS=Homo sapiens GN=POLR2A PE=1 SV=2	1970	217615		13	10	6.1					9		3				2.763e-08		9.8e-10			Sample1 Only		Sample3 Only
E9PD53	E9PD53_HUMAN Structural maintenance of chromosomes protein OS=Homo sapiens GN=SMC4 PE=2 SV=1	1263	147469	Q9NTJ3;	13	13	10.5			2	1	6.97		2		2.659e-09	8.735e-10	3.301e-08		1.391e-09	Control2 Only	Control3 Only	Sample1 Only		Sample3 Only
P35749	MYH11_HUMAN Myosin-11 OS=Homo sapiens GN=MYH11 PE=1 SV=3	1972	224015	P35749-2;P35749-3;P35749-4;	13	34	15.7	Ammonia-loss (N-term C) + Carbamidomethyl (C),Carbamidomethyl (C),Gln->pyro-Glu (N-term Q),Oxidation (M)		4	0.5	1	0.5	1		1.718e-08	5.073e-10	4.765e-09	1.715e-09	1.096e-09	Control2 Only	Control3 Only	Sample1 Only	Sample2 Only	Sample3 Only
J3KR97	J3KR97_HUMAN Tubulin-specific chaperone D OS=Homo sapiens GN=TBCD PE=2 SV=1	1230	138940	Q9BTW9;Q9BTW9-4;	13	11	9.5	Carbamidomethyl (C)	4.94	2.96		3.95			1.726e-08	1.66e-08		1.92e-08			0.961761	Control1 Only	1.1124	Control1 Only	Control1 Only
H7BXY3	H7BXY3_HUMAN Putative ATP-dependent RNA helicase DHX30 OS=Homo sapiens GN=DHX30 PE=2 SV=1	1166	129699	Q7L2E3;Q7L2E3-2;Q7L2E3-3;	13	14	11.4	Oxidation (M)				12						4.58e-08					Sample1 Only
Q9BXJ9	NAA15_HUMAN N-alpha-acetyltransferase 15, NatA auxiliary subunit OS=Homo sapiens GN=NAA15 PE=1 SV=1	866	101460		13	9	8.9	Carbamidomethyl (C)	1	1		10			4.768e-09	7.62e-09		1.032e-07			1.59815	Control1 Only	21.6443	Control1 Only	Control1 Only
Q9UGM3	DMBT1_HUMAN Deleted in malignant brain tumors 1 protein OS=Homo sapiens GN=DMBT1 PE=1 SV=2	2413	274025	Q9UGM3-3;Q9UGM3-5;Q9UGM3-6;Q9UGM3-7;	13	9	17.2	Carbamidomethyl (C)		2			11			6.501e-09			1.395e-07		Control2 Only			Sample2 Only
CONT_CATA_HUMAN	Possible Contaminant CATA_HUMAN	526	59862.8	P04040;	12	11	24			1			11			1.624e-08			2.327e-07		Control2 Only			Sample2 Only
P14780	MMP9_HUMAN Matrix metalloproteinase-9 OS=Homo sapiens GN=MMP9 PE=1 SV=3	707	78606.5		12	9	14.9	Carbamidomethyl (C)					12						2.502e-07					Sample2 Only
Q05086	UBE3A_HUMAN Ubiquitin-protein ligase E3A OS=Homo sapiens GN=UBE3A PE=1 SV=4	875	100290	Q05086-2;Q05086-3;	12	9	11.7		2			9			1.191e-08			5.966e-08			Control1 Only	Control1 Only	5.00924	Control1 Only	Control1 Only
P11388	TOP2A_HUMAN DNA topoisomerase 2-alpha OS=Homo sapiens GN=TOP2A PE=1 SV=3	1531	183035	P11388-2;P11388-3;P11388-4;	12	10	6.9			1	2	8.99				2.01e-09	1.319e-09	1.887e-08			Control2 Only	Control3 Only	Sample1 Only
B4DUR8	B4DUR8_HUMAN T-complex protein 1 subunit gamma OS=Homo sapiens GN=CCT3 PE=2 SV=1	500	56539.3	P49368;P49368-2;	12	6	14.4	Oxidation (M)	3	1		4	1	1	4.497e-08	9.447e-09		9.478e-08	2.111e-08	4.491e-09	0.210073	Control1 Only	2.10763	0.469424	0.0998666
B4DZH6	B4DZH6_HUMAN Histone deacetylase 6 OS=Homo sapiens GN=HDAC6 PE=2 SV=1	1229	131696	Q9UBN7;	12	5	5.3	Oxidation (M)	0.99		0.99	0.99	6.93	0.99	7.054e-09		6.272e-10	1.427e-09	4.56e-08	6.376e-10	Control1 Only	0.0889141	0.202297	6.46442	0.0903884
E5RJ68	E5RJ68_HUMAN AP-3 complex subunit beta-1 OS=Homo sapiens GN=AP3B1 PE=2 SV=1	1045	121569	O00203;	12	12	9.9	Oxidation (M)		2		8.96	1			9.163e-09		3.927e-08	3.338e-09		Control2 Only		Sample1 Only	Sample2 Only
F8VUA6	F8VUA6_HUMAN 60S ribosomal protein L18 (Fragment) OS=Homo sapiens GN=RPL18 PE=2 SV=1	130	21675.1	F8VWC5;G3V203;H0YHA7;J3QQ67;Q07020;	12	4	36.2	Carbamidomethyl (C)		1		4	2	2		1.168e-08		8.708e-07	6.463e-08	1.021e-07	Control2 Only		Sample1 Only	Sample2 Only	Sample3 Only
Q8N1N4	K2C78_HUMAN Keratin, type II cytoskeletal 78 OS=Homo sapiens GN=KRT78 PE=2 SV=2	520	56974.6		12	13	20	Carbamidomethyl (C)		4.99	1		2.99	2		5.023e-08	1.088e-09		4.441e-08	3.266e-09	Control2 Only	Control3 Only		Sample2 Only	Sample3 Only
P60866	RS20_HUMAN 40S ribosomal protein S20 OS=Homo sapiens GN=RPS20 PE=1 SV=1	119	16031.5	P60866-2;	12	5	36.1	Carbamidomethyl (C)	0.99	0.99		3.96	1.98	1.98	1.088e-07	1.352e-07		6.396e-07	3.376e-07	3.124e-08	1.24265	Control1 Only	5.87868	3.10294	0.287132
Q14139	UBE4A_HUMAN Ubiquitin conjugation factor E4 A OS=Homo sapiens GN=UBE4A PE=1 SV=2	1066	123749	Q14139-2;	12	8	7.8	Oxidation (M)	2		3	5		2	1.303e-08		2.29e-09	2.165e-08		3.573e-09	Control1 Only	0.175748	1.66155	Control1 Only	0.274213
Q7L775	EPMIP_HUMAN EPM2A-interacting protein 1 OS=Homo sapiens GN=EPM2AIP1 PE=1 SV=1	607	70505.2		12	9	15	Oxidation (M)	2			9.75			3.285e-08			1.789e-07			Control1 Only	Control1 Only	5.44597	Control1 Only	Control1 Only
P32119	PRDX2_HUMAN Peroxiredoxin-2 OS=Homo sapiens GN=PRDX2 PE=1 SV=5	198	21932.3		12	4	19.7		3	0.5	1.5		1.5	0.5	4.539e-07	2.063e-08	1.382e-08		1.048e-07	3.158e-09	0.0454505	0.0304472	Control1 Only	0.230888	0.00695748
P24158	PRTN3_HUMAN Myeloblastin OS=Homo sapiens GN=PRTN3 PE=1 SV=3	256	23650.1	U3KPS2;	11	4	24.7						8						1.272e-06					Sample2 Only
Q14692	BMS1_HUMAN Ribosome biogenesis protein BMS1 homolog OS=Homo sapiens GN=BMS1 PE=1 SV=1	1282	146094		11	9	6.9	Carbamidomethyl (C)				11						5.103e-08					Sample1 Only
P10398	ARAF_HUMAN Serine/threonine-protein kinase A-Raf OS=Homo sapiens GN=ARAF PE=1 SV=2	606	67722.4		11	10	18.5	Gln->pyro-Glu (N-term Q),Oxidation (M)				3.5	3	2.5				3.847e-08	3.96e-08	1.668e-08			Sample1 Only	Sample2 Only	Sample3 Only
P23258	TBG1_HUMAN Tubulin gamma-1 chain OS=Homo sapiens GN=TUBG1 PE=1 SV=2	451	51263.8		11	4	8.4		0.99	0.99		3.97		3.97	1.194e-08	8.321e-09		8.367e-08		3.157e-08	0.696901	Control1 Only	7.00754	Control1 Only	2.64405
P26373	RL13_HUMAN 60S ribosomal protein L13 OS=Homo sapiens GN=RPL13 PE=1 SV=4	211	24300.6		11	5	24.6	Oxidation (M)		1.98		3.99	2.99	1.99		1.066e-07		5.436e-07	1.135e-07	2.165e-08	Control2 Only		Sample1 Only	Sample2 Only	Sample3 Only
Q08378	GOGA3_HUMAN Golgin subfamily A member 3 OS=Homo sapiens GN=GOLGA3 PE=1 SV=2	1498	156002	Q08378-2;	11	7	5.5	Oxidation (M)	1			4	1	4	1.478e-09			1.048e-08	1.37e-09	2.425e-09	Control1 Only	Control1 Only	7.09066	0.926928	1.64073
Q6YN16	HSDL2_HUMAN Hydroxysteroid dehydrogenase-like protein 2 OS=Homo sapiens GN=HSDL2 PE=1 SV=1	418	37386.3	Q6YN16-2;	11	6	23.8	Carbamidomethyl (C)	3	1	4	1	2		6.057e-08	1.544e-08	2.097e-08	2.576e-08	2.343e-08		0.254912	0.346211	0.425293	0.386825	Control1 Only
Q8IZ83	A16A1_HUMAN Aldehyde dehydrogenase family 16 member A1 OS=Homo sapiens GN=ALDH16A1 PE=1 SV=2	802	85307.8		11	9	12.8	Carbamidomethyl (C),Oxidation (M)	0.99			9.9			1.042e-08			1.652e-07			Control1 Only	Control1 Only	15.8541	Control1 Only	Control1 Only
Q13509	TBB3_HUMAN Tubulin beta-3 chain OS=Homo sapiens GN=TUBB3 PE=1 SV=2	450	50526.3		11	22	44.4	Carbamidomethyl (C),Glu->pyro-Glu (N-term E),Oxidation (M)		2	1		4	4		1.812e-07	5.399e-09		3.871e-07	8.122e-08	Control2 Only	Control3 Only		Sample2 Only	Sample3 Only
Q9UBM7	DHCR7_HUMAN 7-dehydrocholesterol reductase OS=Homo sapiens GN=DHCR7 PE=1 SV=1	475	54579.8		11	2	4.4	Carbamidomethyl (C)			2	2	2	3			1.065e-08	7.884e-08	5.327e-08	2.255e-08		Control3 Only	Sample1 Only	Sample2 Only	Sample3 Only
E7ETK0	E7ETK0_HUMAN 40S ribosomal protein S24 OS=Homo sapiens GN=RPS24 PE=2 SV=1	131	32482	P62847;P62847-2;P62847-3;P62847-4;	10	5	41.5	Acetyl (Protein N-term)				9						2.085e-06					Sample1 Only
O75165	DJC13_HUMAN DnaJ homolog subfamily C member 13 OS=Homo sapiens GN=DNAJC13 PE=1 SV=5	2243	254919		10	11	6.1			1		9				9.739e-10		1.563e-08			Control2 Only		Sample1 Only
Q99523	SORT_HUMAN Sortilin OS=Homo sapiens GN=SORT1 PE=1 SV=3	831	77523.9	Q99523-2;	10	4	7.8	Carbamidomethyl (C)				2	1	5				1.296e-08	4.305e-09	1.694e-08			Sample1 Only	Sample2 Only	Sample3 Only
P11216	PYGB_HUMAN Glycogen phosphorylase, brain form OS=Homo sapiens GN=PYGB PE=1 SV=5	843	96886.7		10	7	7.5		0.51	2		4.53	0.51		2.367e-09	9.964e-09		5.16e-08	4.94e-09		4.20955	Control1 Only	21.7997	2.08703	Control1 Only
CONT_CATD_HUMAN	Possible Contaminant CATD_HUMAN	412	44631.7	P07339;	10	5	13.3	Oxidation (M)		1			6.95			3.172e-08			1.668e-07		Control2 Only			Sample2 Only
P26038	MOES_HUMAN Moesin OS=Homo sapiens GN=MSN PE=1 SV=3	577	67939.9		10	9	12.7						10						1.575e-07					Sample2 Only
M0R2B7	M0R2B7_HUMAN DNA polymerase OS=Homo sapiens GN=POLD1 PE=2 SV=1	1133	123877	P28340;	10	12	10.9	Glu->pyro-Glu (N-term E)	0.99			7.92			7.728e-10			3.325e-08			Control1 Only	Control1 Only	43.0254	Control1 Only	Control1 Only
O00231	PSD11_HUMAN 26S proteasome non-ATPase regulatory subunit 11 OS=Homo sapiens GN=PSMD11 PE=1 SV=3	422	47631.2	O00231-2;	10	9	20.9	Acetyl (Protein N-term),Carbamidomethyl (C),Oxidation (M)		1	1.99			6.99		1.21e-08	5.277e-09			6.329e-08	Control2 Only	Control3 Only			Sample3 Only
P43246	MSH2_HUMAN DNA mismatch repair protein Msh2 OS=Homo sapiens GN=MSH2 PE=1 SV=1	934	97513.1	P43246-2;	10	8	9.4			1	4	1		3		3.406e-09	2.984e-09	4.337e-09		5.793e-09	Control2 Only	Control3 Only	Sample1 Only		Sample3 Only
O75643	U520_HUMAN U5 small nuclear ribonucleoprotein 200 kDa helicase OS=Homo sapiens GN=SNRNP200 PE=1 SV=2	2136	244983		10	11	5.8	Carbamidomethyl (C),Oxidation (M)		1		8				8.217e-10		2.142e-08			Control2 Only		Sample1 Only
P62266	RS23_HUMAN 40S ribosomal protein S23 OS=Homo sapiens GN=RPS23 PE=1 SV=3	143	15833.7		10	5	29.4					8.98	1					3.014e-06	5.287e-08				Sample1 Only	Sample2 Only
Q01469	FABP5_HUMAN Fatty acid-binding protein, epidermal OS=Homo sapiens GN=FABP5 PE=1 SV=3	135	15190.6		10	6	39.3	Acetyl (Protein N-term),Carbamidomethyl (C)		1			8			1.098e-07			1.068e-06		Control2 Only			Sample2 Only
Q8WVX9	FACR1_HUMAN Fatty acyl-CoA reductase 1 OS=Homo sapiens GN=FAR1 PE=1 SV=1	515	59462.9		10	5	11.3		2	2	2		1	3	1.555e-08	2.302e-08	1.738e-08		6.927e-09	2.636e-08	1.48039	1.11768	Control1 Only	0.445466	1.69518
Q9BVA1	TBB2B_HUMAN Tubulin beta-2B chain OS=Homo sapiens GN=TUBB2B PE=1 SV=1	445	50047		10	28	70.6	Carbamidomethyl (C),Glu->pyro-Glu (N-term E),Oxidation (M)	0.5		0.5	1.5	1.5	2.5	7.535e-09		6.938e-09	2.847e-08	2.672e-08	5.168e-08	Control1 Only	0.92077	3.77837	3.54612	6.85866
Q9Y6G9	DC1L1_HUMAN Cytoplasmic dynein 1 light intermediate chain 1 OS=Homo sapiens GN=DYNC1LI1 PE=1 SV=3	523	56688.1		10	6	13.6	Gln->pyro-Glu (N-term Q)	1			2	3	3	7.314e-09			3.297e-08	4.562e-08	1.718e-08	Control1 Only	Control1 Only	4.50779	6.23735	2.34892
E7EMM2	E7EMM2_HUMAN AP-3 complex subunit delta-1 OS=Homo sapiens GN=AP3D1 PE=2 SV=1	984	136925	G5E988;O14617;O14617-2;O14617-3;O14617-4;O14617-5;	9	8	10.5	Carbamidomethyl (C),Oxidation (M)	1			8			2.296e-09			4.046e-08			Control1 Only	Control1 Only	17.622	Control1 Only	Control1 Only
H0Y8E6	H0Y8E6_HUMAN DNA replication licensing factor MCM2 (Fragment) OS=Homo sapiens GN=MCM2 PE=3 SV=1	836	102102	P49736;	9	8	10.4					8						5.261e-08					Sample1 Only
P49257	LMAN1_HUMAN Protein ERGIC-53 OS=Homo sapiens GN=LMAN1 PE=1 SV=2	510	57657.1		9	5	5.7				3			4			3.242e-08			3.565e-08		Control3 Only			Sample3 Only
Q9H2M9	RBGPR_HUMAN Rab3 GTPase-activating protein non-catalytic subunit OS=Homo sapiens GN=RAB3GAP2 PE=1 SV=1	1393	156300		9	5	4.2		1	1	3	2		2	1.636e-09	2.387e-09	1.675e-09	4.524e-09		1.982e-09	1.45905	1.02384	2.76528	Control1 Only	1.21149
B7ZA04	B7ZA04_HUMAN Cytoplasmic dynein 1 intermediate chain 2 OS=Homo sapiens GN=DYNC1I2 PE=2 SV=1	630	68435.8	F8W8S0;Q13409;Q13409-2;Q13409-3;Q13409-5;Q13409-6;	9	4	8.8					2.99	2	3.99				3.292e-08	2.102e-08	3.834e-08			Sample1 Only	Sample2 Only	Sample3 Only
C9JPM4	C9JPM4_HUMAN ADP-ribosylation factor 4 (Fragment) OS=Homo sapiens GN=ARF4 PE=2 SV=1	127	20533.7	P18085;	9	3	32.3		0.99	1.98	0.99	0.99	2.97	0.99	5.461e-08	2.87e-07	1.918e-08	1.035e-07	2.416e-07	3.159e-08	5.25545	0.351218	1.89526	4.4241	0.578465
P31146	COR1A_HUMAN Coronin-1A OS=Homo sapiens GN=CORO1A PE=1 SV=4	461	51119.9		9	8	18.9	Carbamidomethyl (C),Oxidation (M)					8.96						1.913e-07					Sample2 Only
P33991	MCM4_HUMAN DNA replication licensing factor MCM4 OS=Homo sapiens GN=MCM4 PE=1 SV=5	863	96749.8		9	9	10.8	Carbamidomethyl (C),Gln->pyro-Glu (N-term Q),Oxidation (M)		1	1	6				8.172e-09	1.894e-09	5.831e-08			Control2 Only	Control3 Only	Sample1 Only
F5H8J2	F5H8J2_HUMAN Uncharacterized protein OS=Homo sapiens GN=P4HB PE=3 SV=1	451	57224.8	H7BZ94;P07237;	9	8	18.2			0.99			7.93			5.158e-09			1.429e-07		Control2 Only			Sample2 Only
H9KV75	H9KV75_HUMAN Alpha-actinin-1 OS=Homo sapiens GN=ACTN1 PE=2 SV=1	822	107344	P12814;P12814-2;P12814-3;P12814-4;	9	15	20.7	Carbamidomethyl (C),Gln->pyro-Glu (N-term Q),Oxidation (M)					8.9						7.082e-08					Sample2 Only
P41218	MNDA_HUMAN Myeloid cell nuclear differentiation antigen OS=Homo sapiens GN=MNDA PE=1 SV=1	407	45915.3		9	9	24.8	Carbamidomethyl (C)					7						1.395e-07					Sample2 Only
P61978	HNRPK_HUMAN Heterogeneous nuclear ribonucleoprotein K OS=Homo sapiens GN=HNRNPK PE=1 SV=1	463	47653.7	P61978-2;P61978-3;Q5T6W2;Q5T6W5;	9	3	10.3		2	2		2	2	1	8.409e-08	2.139e-08		4.929e-08	3.959e-08	6.588e-09	0.25437	Control1 Only	0.586158	0.470805	0.0783446
P62333	PRS10_HUMAN 26S protease regulatory subunit 10B OS=Homo sapiens GN=PSMC6 PE=1 SV=1	389	44253.2		9	5	12.6		1	1.98	0.99	2.98	0.99		1.898e-08	1.727e-08	7.002e-09	1.91e-07	1.063e-08		0.909905	0.368915	10.0632	0.560063	Control1 Only
P12236	ADT3_HUMAN ADP/ATP translocase 3 OS=Homo sapiens GN=SLC25A6 PE=1 SV=4	298	32917.2		9	10	31.9	Oxidation (M)		2	1	1	3	2		6.612e-08	1.538e-08	4.876e-08	1.602e-07	6.404e-08	Control2 Only	Control3 Only	Sample1 Only	Sample2 Only	Sample3 Only
Q6DT37	MRCKG_HUMAN Serine/threonine-protein kinase MRCK gamma OS=Homo sapiens GN=CDC42BPG PE=1 SV=2	1551	172802		9	7	5		1			7		1	1.591e-09			2.964e-08		1.135e-09	Control1 Only	Control1 Only	18.6298	Control1 Only	0.713388
Q99714	HCD2_HUMAN 3-hydroxyacyl-CoA dehydrogenase type-2 OS=Homo sapiens GN=HSD17B10 PE=1 SV=3	261	26978.2		9	4	21.8	Oxidation (M)	1	1.98	0.99	1.99	2.99		4.979e-08	6.96e-08	5.148e-09	9.856e-08	1.218e-07		1.39787	0.103394	1.97951	2.44627	Control1 Only
Q9BUP0	EFHD1_HUMAN EF-hand domain-containing protein D1 OS=Homo sapiens GN=EFHD1 PE=1 SV=1	239	26964.9		9	7	31	Acetyl (Protein N-term),Carbamidomethyl (C),Oxidation (M)		8.98						7.539e-07					Control2 Only
Q9H9T3	ELP3_HUMAN Elongator complex protein 3 OS=Homo sapiens GN=ELP3 PE=1 SV=2	547	60753.3	Q9H9T3-2;	9	8	16.7			0.99		2.97	1.98	2.97		3.401e-09		3.813e-08	3.04e-08	1.239e-08	Control2 Only		Sample1 Only	Sample2 Only	Sample3 Only
P20930	FILA_HUMAN Filaggrin OS=Homo sapiens GN=FLG PE=1 SV=3	4061	436128		8	4	1			3			3	1		4.797e-09			8.101e-09	6.653e-10	Control2 Only			Sample2 Only	Sample3 Only
P01860	IGHG3_HUMAN Ig gamma-3 chain C region OS=Homo sapiens GN=IGHG3 PE=1 SV=2	377	41368.4		8	11	32.1	Carbamidomethyl (C),Oxidation (M)	1	2	2	1	1	1	4.48e-08	3.953e-08	1.276e-08	2.079e-08	3.601e-08	5.418e-09	0.882366	0.284821	0.464062	0.803795	0.120938
CONT_LALBA_BOVIN	Possible Contaminant LALBA_BOVIN	142	16271.9		8	2	16.9	Carbamidomethyl (C),Oxidation (M)		5			2			4.754e-07			1.031e-07		Control2 Only			Sample2 Only
M0QZN2	M0QZN2_HUMAN 40S ribosomal protein S5 OS=Homo sapiens GN=RPS5 PE=2 SV=1	134	22916.1	M0R0F0;M0R0R2;P46782;	8	4	25.4	Carbamidomethyl (C)			1	3	1	2			1.076e-08	4.804e-07	8.309e-08	3.219e-08		Control3 Only	Sample1 Only	Sample2 Only	Sample3 Only
B5MCP9	B5MCP9_HUMAN 40S ribosomal protein S7 OS=Homo sapiens GN=RPS7 PE=2 SV=1	187	22167.3	P62081;	8	3	12.8			1	1	2	1	1		1.833e-07	9.491e-09	3.742e-07	6.752e-08	2.725e-08	Control2 Only	Control3 Only	Sample1 Only	Sample2 Only	Sample3 Only
P31930	QCR1_HUMAN Cytochrome b-c1 complex subunit 1, mitochondrial OS=Homo sapiens GN=UQCRC1 PE=1 SV=3	480	52738.5		8	6	14.8	Carbamidomethyl (C)				7						1.74e-07					Sample1 Only
Q15075	EEA1_HUMAN Early endosome antigen 1 OS=Homo sapiens GN=EEA1 PE=1 SV=2	1411	162781		8	8	6		4		1			2	1.201e-08		5.197e-10			2.245e-09	Control1 Only	0.0432723	Control1 Only	Control1 Only	0.186928
A1L0T0	ILVBL_HUMAN Acetolactate synthase-like protein OS=Homo sapiens GN=ILVBL PE=1 SV=2	632	68004.9		8	4	8.7	Carbamidomethyl (C)		1	1	1	1	4		1.482e-08	5.855e-09	2.575e-08	2.218e-08	3.209e-08	Control2 Only	Control3 Only	Sample1 Only	Sample2 Only	Sample3 Only
C9JA05	C9JA05_HUMAN Immunoglobulin J chain (Fragment) OS=Homo sapiens GN=IGJ PE=2 SV=1	70	18123	D6RD17;D6RHJ6;P01591;	8	3	38.6			2			6			1.493e-07			4.582e-06		Control2 Only			Sample2 Only
P21333	FLNA_HUMAN Filamin-A OS=Homo sapiens GN=FLNA PE=1 SV=4	2647	277152	P21333-2;Q5HY54;	8	6	2.4		1.98	0.99			5		3.797e-09	8.584e-10			1.197e-08		0.226073	Control1 Only	Control1 Only	3.15249	Control1 Only
P29508	SPB3_HUMAN Serpin B3 OS=Homo sapiens GN=SERPINB3 PE=1 SV=2	390	44644.6		8	6	13.6			1			6.94			7.538e-09			2.304e-07		Control2 Only			Sample2 Only
P30740	ILEU_HUMAN Leukocyte elastase inhibitor OS=Homo sapiens GN=SERPINB1 PE=1 SV=1	379	42822.8		8	9	24.8	Oxidation (M)					7.99						2.665e-07					Sample2 Only
J3KRX5	J3KRX5_HUMAN 60S ribosomal protein L17 (Fragment) OS=Homo sapiens GN=RPL17 PE=2 SV=1	174	26409.8	J3QLC8;J3QQT2;J3QS96;P18621;P18621-2;P18621-3;	8	4	26.1					5		2				6.988e-07		4.494e-08			Sample1 Only		Sample3 Only
M0QXB4	M0QXB4_HUMAN Coatomer protein complex, subunit epsilon, isoform CRA_g OS=Homo sapiens GN=COPE PE=2 SV=1	331	28826.6	O14579;O14579-3;	8	6	23.4					5.95						4.308e-07					Sample1 Only
M0QXL5	M0QXL5_HUMAN rRNA 2'-O-methyltransferase fibrillarin (Fragment) OS=Homo sapiens GN=FBL PE=2 SV=1	244	33853.5	M0R0P1;M0R299;M0R2Q4;P22087;	8	4	23.2					1.98		4.95				6.696e-08		4.675e-08			Sample1 Only		Sample3 Only
P61163	ACTZ_HUMAN Alpha-centractin OS=Homo sapiens GN=ACTR1A PE=1 SV=1	376	42695		8	12	37.2	Carbamidomethyl (C),Oxidation (M)		3.96	1.98	0.99		0.99		1.997e-07	1.668e-08	1.494e-07		2.888e-09	Control2 Only	Control3 Only	Sample1 Only		Sample3 Only
O15270	SPTC2_HUMAN Serine palmitoyltransferase 2 OS=Homo sapiens GN=SPTLC2 PE=1 SV=1	562	63046		8	7	15.3	Carbamidomethyl (C)	1	2		2		3	1.05e-08	1.389e-08		2.89e-08		1.519e-08	1.32286	Control1 Only	2.75238	Control1 Only	1.44667
O60884	DNJA2_HUMAN DnaJ homolog subfamily A member 2 OS=Homo sapiens GN=DNAJA2 PE=1 SV=1	412	45824.7		8	6	13.1	Carbamidomethyl (C),Oxidation (M)				1	3	4				4.702e-08	1.154e-07	5.813e-08			Sample1 Only	Sample2 Only	Sample3 Only
P01605	KV113_HUMAN Ig kappa chain V-I region Lay OS=Homo sapiens PE=1 SV=1	108	11844.8		8	2	25	Oxidation (M)		4	2			1		3.455e-07	3.179e-08			2.017e-08	Control2 Only	Control3 Only			Sample3 Only
Q6KB66	K2C80_HUMAN Keratin, type II cytoskeletal 80 OS=Homo sapiens GN=KRT80 PE=1 SV=2	452	54286.4	Q6KB66-2;Q6KB66-3;	8	7	14.9	Oxidation (M)	1	2	1	1	2	1	8.873e-09	2.779e-08	5.406e-09	1.491e-08	3.229e-08	5.226e-09	3.13197	0.609264	1.68038	3.63913	0.588978
P62854	RS26_HUMAN 40S ribosomal protein S26 OS=Homo sapiens GN=RPS26 PE=1 SV=3	115	13025.1		8	2	20.9			1		6		1		1.401e-07		7.964e-06		4.056e-08	Control2 Only		Sample1 Only		Sample3 Only
P62913	RL11_HUMAN 60S ribosomal protein L11 OS=Homo sapiens GN=RPL11 PE=1 SV=2	178	20147.6	P62913-2;	8	3	17.5			1		4	2	1		2.039e-07		6.751e-07	2.425e-07	2.857e-08	Control2 Only		Sample1 Only	Sample2 Only	Sample3 Only
J3KPD9	J3KPD9_HUMAN Nucleoside diphosphate kinase B OS=Homo sapiens GN=NME2 PE=2 SV=1	197	32692.9	P22392;P22392-2;Q32Q12;	8	3	25.9	Oxidation (M)	0.99			1.99	3.96		1.555e-07			2.767e-07	2.84e-07		Control1 Only	Control1 Only	1.77942	1.82637	Control1 Only
C9IZE4	C9IZE4_HUMAN 26S proteasome non-ATPase regulatory subunit 6 OS=Homo sapiens GN=PSMD6 PE=2 SV=1	442	45610.3	Q15008;	7	4	11.6				1.98			3.96			6.919e-09			2.103e-08		Control3 Only			Sample3 Only
P62851	RS25_HUMAN 40S ribosomal protein S25 OS=Homo sapiens GN=RPS25 PE=1 SV=1	125	13769.7		7	2	12.8			1		3	1			7.284e-08		1.224e-06	4.978e-08		Control2 Only		Sample1 Only	Sample2 Only
H9KV70	H9KV70_HUMAN Neutrophil gelatinase-associated lipocalin OS=Homo sapiens GN=LCN2 PE=2 SV=1	200	22496.7	P80188;P80188-2;	7	4	26.8						7						3.561e-07					Sample2 Only
P01861	IGHG4_HUMAN Ig gamma-4 chain C region OS=Homo sapiens GN=IGHG4 PE=1 SV=1	327	36007.9		7	9	37	Carbamidomethyl (C),Oxidation (M)	1		2	1	1	2	2.702e-08		1.923e-08	1.775e-08	4.14e-08	1.398e-08	Control1 Only	0.711695	0.656921	1.5322	0.517395
P08246	ELNE_HUMAN Neutrophil elastase OS=Homo sapiens GN=ELANE PE=1 SV=1	267	28571.8		7	4	9.7	Carbamidomethyl (C)					7						2.047e-06					Sample2 Only
P31949	S10AB_HUMAN Protein S100-A11 OS=Homo sapiens GN=S100A11 PE=1 SV=2	105	11750.8		7	4	39	Oxidation (M)					7						1.038e-06					Sample2 Only
Q7Z3Y8	K1C27_HUMAN Keratin, type I cytoskeletal 27 OS=Homo sapiens GN=KRT27 PE=1 SV=2	459	49917.6		7	10	17.9	Carbamidomethyl (C),Gln->pyro-Glu (N-term Q),Oxidation (M)			4.96			1.99			1.41e-08			6.422e-09		Control3 Only			Sample3 Only
B4E1G6	B4E1G6_HUMAN Galactokinase OS=Homo sapiens GN=GALK1 PE=2 SV=1	422	42353.6	P51570;	7	5	11.5			1	1	2	2	1		2.558e-08	1.646e-09	3.126e-08	5.271e-08	3.185e-09	Control2 Only	Control3 Only	Sample1 Only	Sample2 Only	Sample3 Only
B4E2V5	B4E2V5_HUMAN Erythrocyte band 7 integral membrane protein OS=Homo sapiens GN=STOM PE=2 SV=1	237	31782.8	P27105;	7	5	24.5	Oxidation (M)					6						3.145e-07					Sample2 Only
D6RAN4	D6RAN4_HUMAN 60S ribosomal protein L9 (Fragment) OS=Homo sapiens GN=RPL9 PE=2 SV=1	182	21903.8	H0Y9V9;P32969;	7	3	17						0.99	1.98					8.536e-08	4.565e-08				Sample2 Only	Sample3 Only
F5H2S7	F5H2S7_HUMAN Dynactin subunit 2 OS=Homo sapiens GN=DCTN2 PE=2 SV=1	406	44554	Q13561;Q13561-2;Q13561-3;	7	5	12		3.96			0.99		1.98	7.385e-08			2.195e-08		9.874e-09	Control1 Only	Control1 Only	0.297224	Control1 Only	0.133703
G5EA52	G5EA52_HUMAN Protein disulfide isomerase family A, member 3, isoform CRA_b OS=Homo sapiens GN=PDIA3 PE=2 SV=1	485	56890.8	P30101;	7	3	7.2		1	2	2	1	1		1.487e-08	3.069e-08	8.982e-09	1.384e-08	9.171e-09		2.06389	0.604035	0.930733	0.616745	Control1 Only
H0YKD8	H0YKD8_HUMAN 60S ribosomal protein L28 OS=Homo sapiens GN=RPL28 PE=2 SV=1	170	19172	P46779;P46779-2;P46779-3;	7	6	34.3	Acetyl (Protein N-term),Oxidation (M)		1		3	1	1		1.363e-07		1.761e-06	1.429e-07	1.122e-08	Control2 Only		Sample1 Only	Sample2 Only	Sample3 Only
P20700	LMNB1_HUMAN Lamin-B1 OS=Homo sapiens GN=LMNB1 PE=1 SV=2	586	66529.7		7	8	10.6	Oxidation (M)		5.98			1			9.427e-08			1.185e-08		Control2 Only			Sample2 Only
Q7Z794	K2C1B_HUMAN Keratin, type II cytoskeletal 1b OS=Homo sapiens GN=KRT77 PE=2 SV=3	578	62025.6		7	12	19.4	Carbamidomethyl (C)			6						1.902e-08					Control3 Only
P62424	RL7A_HUMAN 60S ribosomal protein L7a OS=Homo sapiens GN=RPL7A PE=1 SV=2	266	21585.4	Q5T8U3;	7	4	16.2			1		2		3		2.381e-08		7.661e-08		2.577e-08	Control2 Only		Sample1 Only		Sample3 Only
Q5QPL9	Q5QPL9_HUMAN RNA-binding protein Raly (Fragment) OS=Homo sapiens GN=RALY PE=2 SV=1	237	30417.8	Q5QPM0;Q9UKM9;Q9UKM9-2;	7	5	19.8			4.98		1	0.99			2.487e-07		1.678e-08	2.627e-08		Control2 Only		Sample1 Only	Sample2 Only
Q9BV44	THUM3_HUMAN THUMP domain-containing protein 3 OS=Homo sapiens GN=THUMPD3 PE=1 SV=1	507	57110.9		7	6	13.2	Carbamidomethyl (C)						6.99						5.996e-08					Sample3 Only
Q9HAV4	XPO5_HUMAN Exportin-5 OS=Homo sapiens GN=XPO5 PE=1 SV=1	1204	136582		7	8	9.4	Carbamidomethyl (C),Oxidation (M)	3			4			1.057e-08			2.165e-08			Control1 Only	Control1 Only	2.04825	Control1 Only	Control1 Only
Q9ULX6	AKP8L_HUMAN A-kinase anchor protein 8-like OS=Homo sapiens GN=AKAP8L PE=1 SV=3	646	71783.8		7	4	7.9	Carbamidomethyl (C),Oxidation (M)				1	2.99	3				4.92e-09	5.422e-08	1.218e-08			Sample1 Only	Sample2 Only	Sample3 Only
Q6PKG0	LARP1_HUMAN La-related protein 1 OS=Homo sapiens GN=LARP1 PE=1 SV=2	1096	116681	Q6PKG0-3;	7	4	4.5					5.95		0.99				3.141e-08		1.465e-09			Sample1 Only		Sample3 Only
Q9UPN7	PP6R1_HUMAN Serine/threonine-protein phosphatase 6 regulatory subunit 1 OS=Homo sapiens GN=PPP6R1 PE=1 SV=5	881	96915.9		7	2	3.3		1			2		2	1.447e-09			1.069e-08		3.263e-09	Control1 Only	Control1 Only	7.3877	Control1 Only	2.25501
E7ESC6	E7ESC6_HUMAN Exportin-7 OS=Homo sapiens GN=XPO7 PE=2 SV=1	1088	124152	E9PEN8;Q9UIA9;	6	5	4.4		1			2		3	2.7e-09			4.13e-09		4.182e-09	Control1 Only	Control1 Only	1.52963	Control1 Only	1.54889
K7EJT5	K7EJT5_HUMAN 60S ribosomal protein L22 (Fragment) OS=Homo sapiens GN=RPL22 PE=2 SV=1	47	14813.8	K7EKS7;K7ELC4;K7EMH1;K7EP65;K7ERI7;P35268;	6	2	51.1			1	1	1	2	1		5.119e-07	1.382e-07	1.551e-06	7.467e-07	1.574e-07	Control2 Only	Control3 Only	Sample1 Only	Sample2 Only	Sample3 Only
E7EMS6	E7EMS6_HUMAN Catechol O-methyltransferase (Fragment) OS=Homo sapiens GN=COMT PE=2 SV=1	223	24487.4	E7EUU8;P21964;P21964-2;	6	3	17.6	Carbamidomethyl (C)	0.99	0.99	0.99	1.98			5.159e-08	7.165e-08	1.386e-08	3.722e-07			1.38884	0.268657	7.21458	Control1 Only	Control1 Only
Q96HS1	PGAM5_HUMAN Serine/threonine-protein phosphatase PGAM5, mitochondrial OS=Homo sapiens GN=PGAM5 PE=1 SV=2	289	28074.5	Q96HS1-2;	6	4	13.7					1	2.99	1				1.783e-08	1.363e-07	8.137e-09			Sample1 Only	Sample2 Only	Sample3 Only
B7Z4C8	B7Z4C8_HUMAN 60S ribosomal protein L31 OS=Homo sapiens GN=RPL31 PE=2 SV=1	130	14022.8	B7Z4E3;B8ZZK4;C9JU56;H7C2W9;P62899;P62899-2;P62899-3;	6	2	20.3		1	1		3	1		8.149e-08	1.278e-07		8.189e-07	1.008e-07		1.56829	Control1 Only	10.0491	1.23696	Control1 Only
P04080	CYTB_HUMAN Cystatin-B OS=Homo sapiens GN=CSTB PE=1 SV=2	98	11150.6		6	2	24.5			2			3			2.837e-07			5.097e-07		Control2 Only			Sample2 Only
Q08554	DSC1_HUMAN Desmocollin-1 OS=Homo sapiens GN=DSC1 PE=1 SV=2	894	94010.2	Q08554-2;	6	3	5.4			2	2			1		3.136e-08	8.641e-09			1.492e-09	Control2 Only	Control3 Only			Sample3 Only
P11215	ITAM_HUMAN Integrin alpha-M OS=Homo sapiens GN=ITGAM PE=1 SV=2	1152	127569	P11215-2;	6	6	6.6						6						4.564e-08					Sample2 Only
P20061	TCO1_HUMAN Transcobalamin-1 OS=Homo sapiens GN=TCN1 PE=1 SV=2	433	48302.1		6	4	12.5	Oxidation (M)					6						1.183e-07					Sample2 Only
P31944	CASPE_HUMAN Caspase-14 OS=Homo sapiens GN=CASP14 PE=1 SV=2	242	27734		6	5	21.1	Carbamidomethyl (C)					5						2.002e-07					Sample2 Only
B9A064	IGLL5_HUMAN Immunoglobulin lambda-like polypeptide 5 OS=Homo sapiens GN=IGLL5 PE=2 SV=2	214	23102.7		6	5	32.7	Carbamidomethyl (C)		1			5			1.6e-08			3.13e-07		Control2 Only			Sample2 Only
P10809	CH60_HUMAN 60 kDa heat shock protein, mitochondrial OS=Homo sapiens GN=HSPD1 PE=1 SV=2	573	61178.5		6	4	7.3		2	2		1		1	2.577e-08	2.365e-08		1.459e-08		2.216e-09	0.917734	Control1 Only	0.566162	Control1 Only	0.0859915
B4DEM7	B4DEM7_HUMAN T-complex protein 1 subunit theta OS=Homo sapiens GN=CCT8 PE=2 SV=1	529	59744.6	P50990;	6	5	11		0.99	0.99		0.99	1.98		1.109e-08	7.796e-09		1.509e-08	4.034e-08		0.702976	Control1 Only	1.36069	3.63751	Control1 Only
B4DQJ8	B4DQJ8_HUMAN 6-phosphogluconate dehydrogenase, decarboxylating OS=Homo sapiens GN=PGD PE=2 SV=1	470	53250	F5H7U0;P52209;	6	7	16.5						5.94						1.597e-07					Sample2 Only
B4DXW1	B4DXW1_HUMAN Actin-related protein 3 OS=Homo sapiens GN=ACTR3 PE=2 SV=1	367	47449	F5H3P5;P61158;	6	5	13.5	Oxidation (M)		2		1	1.99			4.939e-08		2.585e-08	3.416e-08		Control2 Only		Sample1 Only	Sample2 Only
CONT_TRFE_HUMAN	Possible Contaminant TRFE_HUMAN	698	77211.7	J3KN47;P02787;	6	6	9.3	Oxidation (M)		1			4			5.599e-09			4.742e-08		Control2 Only			Sample2 Only
P17213	BPI_HUMAN Bactericidal permeability-increasing protein OS=Homo sapiens GN=BPI PE=1 SV=4	487	54009.1		6	4	9						6						1.427e-07					Sample2 Only
E9PK25	E9PK25_HUMAN Cofilin-1 OS=Homo sapiens GN=CFL1 PE=2 SV=1	204	18526.7	G3V1A4;P23528;	6	5	45.6						5.96						6.959e-07					Sample2 Only
F5GYR8	F5GYR8_HUMAN General vesicular transport factor p115 OS=Homo sapiens GN=USO1 PE=2 SV=1	971	109415	F5H4X1;O60763;O60763-2;	6	5	6.2		1	1	3	1			4.477e-09	2.298e-09	1.935e-09	3.529e-09			0.51329	0.432209	0.788251	Control1 Only	Control1 Only
G3V3G9	G3V3G9_HUMAN DDB1- and CUL4-associated factor 8 OS=Homo sapiens GN=DCAF8 PE=2 SV=1	751	66973.2	Q5TAQ9;	6	4	6.5	Carbamidomethyl (C)		1.99		1.99		2		2.311e-08		1.327e-08		9.017e-09	Control2 Only		Sample1 Only		Sample3 Only
H0Y6C3	H0Y6C3_HUMAN Pyrroline-5-carboxylate reductase 3 (Fragment) OS=Homo sapiens GN=PYCRL PE=2 SV=1	261	28702.9	Q53H96;	6	5	20.7	Carbamidomethyl (C),Oxidation (M)	1			1		4	4.309e-08			1.087e-07		6.415e-08	Control1 Only	Control1 Only	2.52263	Control1 Only	1.48874
H3BN98	H3BN98_HUMAN Uncharacterized protein (Fragment) OS=Homo sapiens PE=4 SV=2	237	14866	I3L246;I3L3P7;P62244;	6	4	38	Oxidation (M)				4	1					6.157e-07	1.523e-08				Sample1 Only	Sample2 Only
P37837	TALDO_HUMAN Transaldolase OS=Homo sapiens GN=TALDO1 PE=1 SV=2	337	37606.5		6	5	16.3	Carbamidomethyl (C)					5						1.336e-07					Sample2 Only
O15397	IPO8_HUMAN Importin-8 OS=Homo sapiens GN=IPO8 PE=1 SV=2	1037	120167		6	4	4.5		1			2.99		2	1.078e-08			2.443e-08		1.785e-09	Control1 Only	Control1 Only	2.26623	Control1 Only	0.165584
P01620	KV302_HUMAN Ig kappa chain V-III region SIE OS=Homo sapiens PE=1 SV=1	109	11756.9	P01623;	6	4	45.9			0.99			4.96			2.149e-08			1.088e-06		Control2 Only			Sample2 Only
P01871	IGHM_HUMAN Ig mu chain C region OS=Homo sapiens GN=IGHM PE=1 SV=3	452	51884	P01871-2;	6	6	12.8	Carbamidomethyl (C)					4.96						1.434e-07					Sample2 Only
P04843	RPN1_HUMAN Dolichyl-diphosphooligosaccharide--protein glycosyltransferase subunit 1 OS=Homo sapiens GN=RPN1 PE=1 SV=1	607	68706.9		6	6	11.2		2		1	2			2.632e-08		3.548e-09	3.114e-08			Control1 Only	0.134802	1.18313	Control1 Only	Control1 Only
Q5RKV6	EXOS6_HUMAN Exosome complex component MTR3 OS=Homo sapiens GN=EXOSC6 PE=1 SV=1	272	28289.7		6	2	9.9		2		3	1			1.596e-07		3.599e-08	6.999e-08			Control1 Only	0.225501	0.438534	Control1 Only	Control1 Only
B3KNT8	B3KNT8_HUMAN Nucleosome assembly protein 1-like 1 OS=Homo sapiens GN=NAP1L1 PE=2 SV=1	368	45454	B3KV44;B7Z9C2;F5H4R6;F8VUX1;F8VV59;F8VXI6;F8VY35;F8W020;F8W0J6;F8W118;F8W543;H0YH88;H0YHC3;H0YIV4;P55209;	6	2	8.9		0.99		0.99	1.99		0.99	3.165e-08		1.273e-08	9.458e-08		1.518e-08	Control1 Only	0.402212	2.98831	Control1 Only	0.479621
Q4ZG55	GREB1_HUMAN Protein GREB1 OS=Homo sapiens GN=GREB1 PE=2 SV=1	1949	216906		6	5	2.5	Oxidation (M)				2	1	2				5.784e-09	2.009e-09	1.743e-09			Sample1 Only	Sample2 Only	Sample3 Only
P18077	RL35A_HUMAN 60S ribosomal protein L35a OS=Homo sapiens GN=RPL35A PE=1 SV=2	110	12547.8		5	4	28.2	Oxidation (M)				1.99	0.99					4.071e-07	6.457e-08				Sample1 Only	Sample2 Only
P25311	ZA2G_HUMAN Zinc-alpha-2-glycoprotein OS=Homo sapiens GN=AZGP1 PE=1 SV=2	298	34309.1		5	2	8.7			1	1		3			3.986e-08	3.243e-09		1.307e-07		Control2 Only	Control3 Only		Sample2 Only
B4DH70	B4DH70_HUMAN F-box/WD repeat-containing protein 11 OS=Homo sapiens GN=FBXW11 PE=2 SV=1	510	65169.8	Q68DS0;Q9UKB1;Q9UKB1-2;Q9UKB1-3;Q9Y297;Q9Y297-2;	5	2	4.3		1	1	1	2			8.966e-09	8.705e-09	3.897e-09	2.019e-08			0.97089	0.434642	2.25184	Control1 Only	Control1 Only
F8W9B4	F8W9B4_HUMAN Replication factor C subunit 5 OS=Homo sapiens GN=RFC5 PE=2 SV=1	255	36172	P40937;P40937-2;	5	3	9.8			1.99		2.98				6.48e-08		1.577e-07			Control2 Only		Sample1 Only
O00232	PSD12_HUMAN 26S proteasome non-ATPase regulatory subunit 12 OS=Homo sapiens GN=PSMD12 PE=1 SV=3	456	50672.4	O00232-2;	5	4	8	Oxidation (M)			2			2.99			1.159e-08			2.061e-08		Control3 Only			Sample3 Only
P09382	LEG1_HUMAN Galectin-1 OS=Homo sapiens GN=LGALS1 PE=1 SV=2	135	14742.2		5	3	23.7	Oxidation (M)		1			4			5.141e-08			7.707e-07		Control2 Only			Sample2 Only
P50336	PPOX_HUMAN Protoporphyrinogen oxidase OS=Homo sapiens GN=PPOX PE=1 SV=1	477	50859.7		5	2	4				0.99	0.99					5.58e-09	4.469e-08				Control3 Only	Sample1 Only
P30041	PRDX6_HUMAN Peroxiredoxin-6 OS=Homo sapiens GN=PRDX6 PE=1 SV=3	224	25073.2		5	4	20.5		1	1			2		7.864e-08	1.925e-08			8.559e-08		0.244786	Control1 Only	Control1 Only	1.08838	Control1 Only
Q3SYB4	Q3SYB4_HUMAN SERPINB12 protein OS=Homo sapiens GN=SERPINB12 PE=2 SV=1	425	46355.1	Q96P63;	5	4	9.9			2			1			1.547e-08			9.252e-09		Control2 Only			Sample2 Only
Q8TEQ6	GEMI5_HUMAN Gem-associated protein 5 OS=Homo sapiens GN=GEMIN5 PE=1 SV=3	1508	168933		5	7	4.4					5						1.757e-08					Sample1 Only
A8MYB8	A8MYB8_HUMAN Aldehyde dehydrogenase, dimeric NADP-preferring OS=Homo sapiens GN=ALDH3A1 PE=2 SV=1	389	50488.9	P30838;	5	5	15.4						4.94						1.204e-07					Sample2 Only
CONT_GSTP1_HUMAN	Possible Contaminant GSTP1_HUMAN	209	23395.1	P09211;	5	5	30.6	Carbamidomethyl (C)					5						3.032e-07					Sample2 Only
G5E9V5	G5E9V5_HUMAN 28S ribosomal protein S22, mitochondrial OS=Homo sapiens GN=MRPS22 PE=2 SV=1	359	41344.4	G5E9W7;P82650;	5	3	13.5			1		4				6.172e-09		7.437e-08			Control2 Only		Sample1 Only
H7BXD5	H7BXD5_HUMAN Grancalcin OS=Homo sapiens GN=GCA PE=2 SV=1	198	24048.5	H7C2Z6;P28676;	5	5	39	Oxidation (M)					4.99						2.25e-07					Sample2 Only
J3KPZ3	J3KPZ3_HUMAN Probable E3 ubiquitin-protein ligase MYCBP2 OS=Homo sapiens GN=MYCBP2 PE=2 SV=1	4678	510770	O75592;O75592-2;	5	7	1.9	Gln->pyro-Glu (N-term Q)				5						5.464e-09					Sample1 Only
P41240	CSK_HUMAN Tyrosine-protein kinase CSK OS=Homo sapiens GN=CSK PE=1 SV=1	450	50797.8		5	2	5.3			1.99	1	0.99				5.088e-08	7.143e-09	3.031e-08			Control2 Only	Control3 Only	Sample1 Only
P00966	ASSY_HUMAN Argininosuccinate synthase OS=Homo sapiens GN=ASS1 PE=1 SV=2	412	46609		5	5	10			3	1					4.368e-08	3.834e-09				Control2 Only	Control3 Only
P60174	TPIS_HUMAN Triosephosphate isomerase OS=Homo sapiens GN=TPI1 PE=1 SV=3	286	17983.3	P60174-1;P60174-4;	5	4	31.7	Carbamidomethyl (C)					3.99						2.03e-07					Sample2 Only
Q9Y2T7	YBOX2_HUMAN Y-box-binding protein 2 OS=Homo sapiens GN=YBX2 PE=1 SV=2	364	38602.8		5	6	20.3					4		1				8.971e-08		9.829e-09			Sample1 Only		Sample3 Only
Q32MZ4	LRRF1_HUMAN Leucine-rich repeat flightless-interacting protein 1 OS=Homo sapiens GN=LRRFIP1 PE=1 SV=2	808	82854.7	Q32MZ4-2;Q32MZ4-3;	5	4	6.8		3		1			1	1.275e-08		9.899e-10			7.508e-10	Control1 Only	0.0776392	Control1 Only	Control1 Only	0.0588863
Q93100-3	KPBB_HUMAN Isoform 3 of Phosphorylase b kinase regulatory subunit beta OS=Homo sapiens GN=PHKB	1093	124070	Q93100-4;	5	5	4.6		0.99			3.96			2.442e-09			1.986e-08			Control1 Only	Control1 Only	8.13268	Control1 Only	Control1 Only
Q9BT22	ALG1_HUMAN Chitobiosyldiphosphodolichol beta-mannosyltransferase OS=Homo sapiens GN=ALG1 PE=1 SV=2	464	52610		5	4	9.3					1.98	0.99	0.99				4.128e-08	1.829e-08	1.079e-08			Sample1 Only	Sample2 Only	Sample3 Only
Q9Y2I8	WDR37_HUMAN WD repeat-containing protein 37 OS=Homo sapiens GN=WDR37 PE=1 SV=2	494	54775.6		5	4	7.5					2.98		1				7.618e-08		3.37e-09			Sample1 Only		Sample3 Only
O75306	NDUS2_HUMAN NADH dehydrogenase [ubiquinone] iron-sulfur protein 2, mitochondrial OS=Homo sapiens GN=NDUFS2 PE=1 SV=2	463	51944.5	O75306-2;	5	3	7.4	Carbamidomethyl (C)		1			1	3		1.314e-08			1.34e-08	1.721e-08	Control2 Only			Sample2 Only	Sample3 Only
Q96NB2	SFXN2_HUMAN Sideroflexin-2 OS=Homo sapiens GN=SFXN2 PE=1 SV=2	322	36297.8		5	2	6.8						2	2					7.346e-08	2.283e-08				Sample2 Only	Sample3 Only
Q8TE77	SSH3_HUMAN Protein phosphatase Slingshot homolog 3 OS=Homo sapiens GN=SSH3 PE=1 SV=2	659	73130.6		5	4	6.4	Oxidation (M)		2.98		1.98				2.04e-08		1.9e-08			Control2 Only		Sample1 Only
P12830	CADH1_HUMAN Cadherin-1 OS=Homo sapiens GN=CDH1 PE=1 SV=3	882	91119.7	Q9UII8;	4	2	2.9				0.99	0.99		1.99			7.265e-10	3.169e-09		4.328e-09		Control3 Only	Sample1 Only		Sample3 Only
E5RHU3	E5RHU3_HUMAN Syndecan-2 (Fragment) OS=Homo sapiens GN=SDC2 PE=2 SV=2	145	22200.2	E5RJB8;E7ESK6;E9PBI9;P34741;	4	2	16.8	Oxidation (M)		3	1					1.387e-07	1.051e-08				Control2 Only	Control3 Only
Q9UBX3	DIC_HUMAN Mitochondrial dicarboxylate carrier OS=Homo sapiens GN=SLC25A10 PE=1 SV=2	287	32196.8	Q9UBX3-2;	4	3	10.1			0.99			1.99	0.99		2.366e-08			8.7e-08	1.593e-08	Control2 Only			Sample2 Only	Sample3 Only
F5GWF6	F5GWF6_HUMAN T-complex protein 1 subunit beta OS=Homo sapiens GN=CCT2 PE=2 SV=2	530	52828.6	F8VQ14;P78371;P78371-2;	4	2	5.8		1	1		1	1		7.651e-09	1.406e-08		9.551e-09	1.495e-08		1.83767	Control1 Only	1.24833	1.95399	Control1 Only
CONT_HBB_HUMAN	Possible Contaminant HBB_HUMAN	146	16024.3	F8W6P5;P68871;	4	3	30						3.97						2.216e-07					Sample2 Only
H0Y764	H0Y764_HUMAN Neurobeachin-like protein 2 (Fragment) OS=Homo sapiens GN=NBEAL2 PE=4 SV=1	2042	299963	Q6ZNJ1;Q6ZNJ1-2;Q6ZNJ1-3;	4	3	1.5		1		1	1		1	2.301e-09		2.375e-10	3.235e-09		8.657e-10	Control1 Only	0.103216	1.40591	Control1 Only	0.376228
J3KNB4	J3KNB4_HUMAN Cathelicidin antimicrobial peptide OS=Homo sapiens GN=CAMP PE=2 SV=1	173	19325.2	P49913;	4	3	14.7						3						7.633e-07					Sample2 Only
K7EL20	K7EL20_HUMAN Eukaryotic translation initiation factor 3 subunit G (Fragment) OS=Homo sapiens GN=EIF3G PE=2 SV=1	263	35679	K7ENA8;K7ER90;O75821;	4	3	11			1	1	1				3.973e-08	6.115e-09	3.051e-08			Control2 Only	Control3 Only	Sample1 Only
P01009	A1AT_HUMAN Alpha-1-antitrypsin OS=Homo sapiens GN=SERPINA1 PE=1 SV=3	418	40327.7	P01009-2;	4	3	10.6						3						8.87e-08					Sample2 Only
P60228	EIF3E_HUMAN Eukaryotic translation initiation factor 3 subunit E OS=Homo sapiens GN=EIF3E PE=1 SV=1	445	52313.5		4	2	3.4				0.99	1.98					4.895e-09	9.084e-08				Control3 Only	Sample1 Only
P02671	FIBA_HUMAN Fibrinogen alpha chain OS=Homo sapiens GN=FGA PE=1 SV=2	866	69893.9	P02671-2;	4	6	9.5						4						7.406e-08					Sample2 Only
P25815	S100P_HUMAN Protein S100-P OS=Homo sapiens GN=S100P PE=1 SV=2	95	10411.2		4	3	31.6						3						6.665e-07					Sample2 Only
P06744	G6PI_HUMAN Glucose-6-phosphate isomerase OS=Homo sapiens GN=GPI PE=1 SV=4	558	64446	P06744-2;	4	4	9						3.97						6.277e-08					Sample2 Only
F5H897	F5H897_HUMAN Heat shock protein 75 kDa, mitochondrial OS=Homo sapiens GN=TRAP1 PE=2 SV=1	651	80257.8	Q12931;	4	5	8.3				1	1		1			4.331e-09	7.336e-09		4.084e-09		Control3 Only	Sample1 Only		Sample3 Only
Q14566	MCM6_HUMAN DNA replication licensing factor MCM6 OS=Homo sapiens GN=MCM6 PE=1 SV=1	821	93065.4		4	4	5.1					4						2.25e-08					Sample1 Only
Q9NYU2	UGGG1_HUMAN UDP-glucose:glycoprotein glucosyltransferase 1 OS=Homo sapiens GN=UGGT1 PE=1 SV=3	1555	175317	Q9NYU2-2;	4	7	3.8			1	1	2				1.682e-09	3.703e-10	6.273e-09			Control2 Only	Control3 Only	Sample1 Only
Q9Y657	SPIN1_HUMAN Spindlin-1 OS=Homo sapiens GN=SPIN1 PE=1 SV=3	262	29653.8		4	3	15.3		2	1	1				9.121e-08	4.798e-08	1e-08				0.526039	0.109637	Control1 Only	Control1 Only	Control1 Only
B4DEK7	B4DEK7_HUMAN Ras-related protein Rab-8A OS=Homo sapiens GN=RAB8A PE=2 SV=1	207	22211.3	F5GY21;F5H157;H0YMN7;H0YNE9;P59190;P59190-2;P61006;P61026;P62820;Q15286;Q15286-2;Q92928;Q92930;Q9H0U4;	4	2	23.9			2.97			0.99			1.511e-07			3.873e-08		Control2 Only			Sample2 Only
B4DYD8	B4DYD8_HUMAN T-complex protein 1 subunit epsilon OS=Homo sapiens GN=CCT5 PE=2 SV=1	448	59794.9	B7ZAR1;E7ENZ3;E9PCA1;P48643;	4	4	9.4		1			3			2.838e-08			1.392e-07			Control1 Only	Control1 Only	4.90486	Control1 Only	Control1 Only
B7Z1N3	B7Z1N3_HUMAN GPI transamidase component PIG-T OS=Homo sapiens GN=PIGT PE=2 SV=1	316	59688	F5GWY0;Q969N2;Q969N2-2;Q969N2-4;Q969N2-5;	4	3	11.4					4						1.345e-07					Sample1 Only
CONT_THIO_HUMAN	Possible Contaminant THIO_HUMAN	104	11747.8	P10599;	4	3	32.7	Oxidation (M)		0.99			2.98			1.393e-07			1.072e-06		Control2 Only			Sample2 Only
E7ERK9	E7ERK9_HUMAN Translation initiation factor eIF-2B subunit delta OS=Homo sapiens GN=EIF2B4 PE=2 SV=1	544	57566.3	Q9UI10;Q9UI10-2;Q9UI10-3;	4	4	9					1	1	2				1.083e-08	1.616e-08	1.505e-08			Sample1 Only	Sample2 Only	Sample3 Only
E9PEM5	E9PEM5_HUMAN Lipopolysaccharide-responsive and beige-like anchor protein OS=Homo sapiens GN=LRBA PE=2 SV=1	2575	318348	F5H1X8;P50851;P50851-2;	4	7	2.7	Carbamidomethyl (C),Oxidation (M)		1.99	0.99	1				4.371e-09	6.14e-11	7.506e-10			Control2 Only	Control3 Only	Sample1 Only
F5GXC8	F5GXC8_HUMAN Succinyl-CoA ligase [ADP-forming] subunit beta, mitochondrial OS=Homo sapiens GN=SUCLA2 PE=2 SV=1	405	48135.1	F5H5G8;Q9P2R7;Q9P2R7-2;	4	3	9.4	Carbamidomethyl (C)				1		3				9.936e-09		2.593e-08			Sample1 Only		Sample3 Only
F5GZS6	F5GZS6_HUMAN 4F2 cell-surface antigen heavy chain OS=Homo sapiens GN=SLC3A2 PE=2 SV=1	599	71277.3	J3KPF3;P08195;P08195-2;P08195-3;P08195-4;	4	3	6.6		0.99			1.98		0.99	6.183e-09			2.606e-08		2.964e-09	Control1 Only	Control1 Only	4.21478	Control1 Only	0.479379
H0YBB3	H0YBB3_HUMAN Epithelial-splicing regulatory protein 1 (Fragment) OS=Homo sapiens GN=ESRP1 PE=2 SV=1	522	73266	H0YBR2;Q6NXG1;Q6NXG1-2;Q6NXG1-3;Q6NXG1-4;Q6NXG1-5;	4	2	5.4					1	1	1				1.036e-08	1.479e-08	9.04e-09			Sample1 Only	Sample2 Only	Sample3 Only
I3L2C7	I3L2C7_HUMAN Gem-associated protein 4 OS=Homo sapiens GN=GEMIN4 PE=2 SV=1	1047	120266	P57678;	4	5	5.2							3						3.113e-09					Sample3 Only
P01766	HV305_HUMAN Ig heavy chain V-III region BRO OS=Homo sapiens PE=1 SV=1	120	13236.4		4	2	25	Carbamidomethyl (C)		0.99			2.97			1.834e-08			7.669e-07		Control2 Only			Sample2 Only
Q13501	SQSTM_HUMAN Sequestosome-1 OS=Homo sapiens GN=SQSTM1 PE=1 SV=1	440	38694.5	Q13501-2;	4	3	11.5	Carbamidomethyl (C)						3.99						5.071e-08					Sample3 Only
Q14764	MVP_HUMAN Major vault protein OS=Homo sapiens GN=MVP PE=1 SV=4	893	99518.1		4	5	5.7					3		1				1.162e-08		1.91e-09			Sample1 Only		Sample3 Only
B4DPJ8	B4DPJ8_HUMAN T-complex protein 1 subunit zeta OS=Homo sapiens GN=CCT6A PE=2 SV=1	500	53399.2	P40227;P40227-2;	4	2	5.1		1			1	2		1.471e-08			1.872e-08	2.783e-08		Control1 Only	Control1 Only	1.2726	1.89191	Control1 Only
B7Z2F4	B7Z2F4_HUMAN T-complex protein 1 subunit delta OS=Homo sapiens GN=CCT4 PE=2 SV=1	389	54829.2	B7Z9L0;P50991;P50991-2;	4	4	11.6				1		1	2			5.05e-09		2.547e-08	9.532e-09		Control3 Only		Sample2 Only	Sample3 Only
P31689	DNJA1_HUMAN DnaJ homolog subfamily A member 1 OS=Homo sapiens GN=DNAJA1 PE=1 SV=2	397	37110.8	P31689-2;	4	3	10						2	2					5.626e-08	2.907e-08				Sample2 Only	Sample3 Only
Q15477	SKIV2_HUMAN Helicase SKI2W OS=Homo sapiens GN=SKIV2L PE=1 SV=3	1246	138028		4	6	5.5	Gln->pyro-Glu (N-term Q)				2.99		0.99				1.031e-08		1.021e-09			Sample1 Only		Sample3 Only
B3KVR1	B3KVR1_HUMAN Small nuclear ribonucleoprotein-associated protein OS=Homo sapiens GN=SNRPN PE=2 SV=1	244	24652.1	J3QLE5;P14678;P14678-2;P14678-3;P63162;	4	2	8.9			2.97		0.99				8.895e-08		6.389e-08			Control2 Only		Sample1 Only
P05089	ARGI1_HUMAN Arginase-1 OS=Homo sapiens GN=ARG1 PE=1 SV=2	322	35731.9	P05089-2;	4	3	9.3				1		3				5.3e-09		6.773e-08			Control3 Only		Sample2 Only
Q00839	HNRPU_HUMAN Heterogeneous nuclear ribonucleoprotein U OS=Homo sapiens GN=HNRNPU PE=1 SV=6	825	89158.3	Q00839-2;	4	2	2.9		1			2	1		2.802e-09			1.939e-08	1.452e-08		Control1 Only	Control1 Only	6.92006	5.18201	Control1 Only
Q96N67	DOCK7_HUMAN Dedicator of cytokinesis protein 7 OS=Homo sapiens GN=DOCK7 PE=1 SV=4	2140	242150	Q96N67-2;Q96N67-3;Q96N67-4;Q96N67-5;Q96N67-6;	4	3	1.5		2.98						5.252e-09						Control1 Only	Control1 Only	Control1 Only	Control1 Only	Control1 Only
B3KSH1	B3KSH1_HUMAN Eukaryotic translation initiation factor 3 subunit F OS=Homo sapiens GN=EIF3F PE=2 SV=1	372	37630.2	B4DEW9;H0YDT6;O00303;	4	2	26			1	1	2				2.156e-08	8.35e-09	5.225e-08			Control2 Only	Control3 Only	Sample1 Only
Q8NF37	PCAT1_HUMAN Lysophosphatidylcholine acyltransferase 1 OS=Homo sapiens GN=LPCAT1 PE=1 SV=2	534	59257.5		3	2	4.7					2						3.495e-08					Sample1 Only
F5GWX5	F5GWX5_HUMAN Chromodomain-helicase-DNA-binding protein 4 OS=Homo sapiens GN=CHD4 PE=2 SV=1	1905	221285	Q14839;Q14839-2;	3	3	1.8					2.98						6.843e-09					Sample1 Only
H3BR94	H3BR94_HUMAN Dynactin subunit 5 OS=Homo sapiens GN=DCTN5 PE=2 SV=1	155	16658.6	Q9BTE1;Q9BTE1-2;	3	3	20.4	Acetyl (Protein N-term),Carbamidomethyl (C),Oxidation (M)	0.99	1.99					5.826e-08	8.595e-08					1.47528	Control1 Only	Control1 Only	Control1 Only	Control1 Only
P01877	IGHA2_HUMAN Ig alpha-2 chain C region OS=Homo sapiens GN=IGHA2 PE=1 SV=3	340	36593.1		3	8	25.9	Carbamidomethyl (C),Gln->pyro-Glu (N-term Q),Oxidation (M)		1			2			1.093e-08			2.018e-07		Control2 Only			Sample2 Only
B9A067	B9A067_HUMAN Mitochondrial inner membrane protein OS=Homo sapiens GN=IMMT PE=2 SV=2	711	83713.4	Q16891;Q16891-2;Q16891-4;	3	3	4.5			2.96						2.525e-08					Control2 Only
O95969	SG1D2_HUMAN Secretoglobin family 1D member 2 OS=Homo sapiens GN=SCGB1D2 PE=2 SV=1	90	9936.35		3	2	22.2						3						6.075e-07					Sample2 Only
P07996	TSP1_HUMAN Thrombospondin-1 OS=Homo sapiens GN=THBS1 PE=1 SV=2	1170	129642		3	3	2.6							3						4.36e-09					Sample3 Only
P01700	LV102_HUMAN Ig lambda chain V-I region HA OS=Homo sapiens PE=1 SV=1	112	11906.9		3	2	18.8			0.99			1.98			3.375e-08			1.962e-07		Control2 Only			Sample2 Only
E9PKH2	E9PKH2_HUMAN Serpin H1 OS=Homo sapiens GN=SERPINH1 PE=2 SV=1	201	46519.2	P50454;	3	2	11.4							2.99						3.642e-08					Sample3 Only
E9PBJ0	E9PBJ0_HUMAN Mucin-5B OS=Homo sapiens GN=MUC5B PE=2 SV=1	5765	597689	Q9HC84;	3	4	0.8						3						4.204e-09					Sample2 Only
F5H1Z7	F5H1Z7_HUMAN Semaphorin-3C OS=Homo sapiens GN=SEMA3C PE=2 SV=1	769	85368.7	Q99985;	3	2	2.9					1	2					7.931e-09	2.403e-08				Sample1 Only	Sample2 Only
P20160	CAP7_HUMAN Azurocidin OS=Homo sapiens GN=AZU1 PE=1 SV=3	251	26940.7		3	3	12.4	Carbamidomethyl (C)					3						1.243e-07					Sample2 Only
G3V1B3	G3V1B3_HUMAN 60S ribosomal protein L21 OS=Homo sapiens GN=RPL21 PE=4 SV=1	87	18589.1	M0R181;P46778;	3	2	29.9			1		2				1.841e-07		6.497e-07			Control2 Only		Sample1 Only
Q96HJ9-2	CG055_HUMAN Isoform 2 of UPF0562 protein C7orf55 OS=Homo sapiens GN=C7orf55	458	46308.7	Q9Y383;Q9Y383-2;Q9Y383-3;	3	2	5.9					3						3.129e-08					Sample1 Only
P14174	MIF_HUMAN Macrophage migration inhibitory factor OS=Homo sapiens GN=MIF PE=1 SV=4	115	12486.2		3	2	17.4	Carbamidomethyl (C)		1			1			1.157e-07			4.662e-08		Control2 Only			Sample2 Only
Q9H993	CF211_HUMAN UPF0364 protein C6orf211 OS=Homo sapiens GN=C6orf211 PE=1 SV=1	441	51265.9		3	2	3.2			0.99		1.99				1.492e-08		5.96e-08			Control2 Only		Sample1 Only
O15020	SPTN2_HUMAN Spectrin beta chain, non-erythrocytic 2 OS=Homo sapiens GN=SPTBN2 PE=1 SV=3	2390	268845	O15020-2;	3	3	1.6			3						3.415e-09					Control2 Only
Q9NUQ8	ABCF3_HUMAN ATP-binding cassette sub-family F member 3 OS=Homo sapiens GN=ABCF3 PE=1 SV=2	709	79132.8	Q9NUQ8-2;	3	2	2.7			1		1		1		8.598e-09		4.911e-09		1.151e-09	Control2 Only		Sample1 Only		Sample3 Only
B4DR61	B4DR61_HUMAN Protein transport protein Sec61 subunit alpha isoform 1 OS=Homo sapiens GN=SEC61A1 PE=2 SV=1	482	52356.6	P61619;	3	3	4.6						1.98	0.99					3.761e-08	2.051e-09				Sample2 Only	Sample3 Only
P39019	RS19_HUMAN 40S ribosomal protein S19 OS=Homo sapiens GN=RPS19 PE=1 SV=2	145	16086.6		3	2	6.9					3						2.428e-07					Sample1 Only
P07305	H10_HUMAN Histone H1.0 OS=Homo sapiens GN=H1F0 PE=1 SV=3	194	19191.3	P07305-2;	3	3	17.5	Oxidation (M)		2			1			8.225e-08			6.268e-08		Control2 Only			Sample2 Only
Q13464	ROCK1_HUMAN Rho-associated protein kinase 1 OS=Homo sapiens GN=ROCK1 PE=1 SV=1	1354	158472		3	3	2		1		1	1			2.978e-09		7.916e-10	2.733e-09			Control1 Only	0.265816	0.91773	Control1 Only	Control1 Only
Q9P1Y5	CAMP3_HUMAN Calmodulin-regulated spectrin-associated protein 3 OS=Homo sapiens GN=CAMSAP3 PE=1 SV=2	1249	138171	Q9P1Y5-2;	3	3	2.7	Carbamidomethyl (C)	1			2			2.299e-09			7.857e-09			Control1 Only	Control1 Only	3.41757	Control1 Only	Control1 Only
P14625	ENPL_HUMAN Endoplasmin OS=Homo sapiens GN=HSP90B1 PE=1 SV=1	803	92645.5		3	4	4.1			2						2.151e-08					Control2 Only
B4DRT2	B4DRT2_HUMAN 28S ribosomal protein S27, mitochondrial OS=Homo sapiens GN=MRPS27 PE=2 SV=1	428	47689.4	D6RH20;D6RJC7;G5EA06;Q92552;	3	2	11.7					1.99						5.247e-08					Sample1 Only
J3QRD1	J3QRD1_HUMAN Fatty aldehyde dehydrogenase OS=Homo sapiens GN=ALDH3A2 PE=2 SV=1	393	57776.8	P51648;P51648-2;	3	3	8.7			0.99	1					5.049e-09	4.932e-09				Control2 Only	Control3 Only
A0FGR8-2	ESYT2_HUMAN Isoform 2 of Extended synaptotagmin-2 OS=Homo sapiens GN=ESYT2	893	98200.8	H7BXI1;	3	3	4.3						1	2					3.821e-09	6.227e-09				Sample2 Only	Sample3 Only
P13010	XRCC5_HUMAN X-ray repair cross-complementing protein 5 OS=Homo sapiens GN=XRCC5 PE=1 SV=3	732	82868.4		3	3	4.1			3						3.272e-08					Control2 Only
B4E102	B4E102_HUMAN Eukaryotic initiation factor 4A-I OS=Homo sapiens GN=EIF4A1 PE=2 SV=1	146	46567.9	E7EMV8;E7EQG2;J3KS25;J3KS93;J3KSN7;J3KT04;J3KT12;J3KTB5;J3QKZ9;J3QL43;J3QLN6;J3QR64;J3QS69;P60842;P60842-2;Q14240;Q14240-2;	3	2	35.3							3						7.928e-08					Sample3 Only
C9JC03	C9JC03_HUMAN EH domain-containing protein 1 (Fragment) OS=Homo sapiens GN=EHD1 PE=2 SV=1	374	60732.8	Q9H4M9;	3	5	15	Oxidation (M)				2.98						4.933e-08					Sample1 Only
E7EM57	E7EM57_HUMAN Glucose-6-phosphate 1-dehydrogenase (Fragment) OS=Homo sapiens GN=G6PD PE=2 SV=1	320	62590.7	E7EUI8;P11413;P11413-2;P11413-3;	3	3	10.6						2.98						4.934e-08					Sample2 Only
P31431	SDC4_HUMAN Syndecan-4 OS=Homo sapiens GN=SDC4 PE=1 SV=2	198	16571.1	P31431-2;	3	3	24.2			3						5.779e-08					Control2 Only
P34897	GLYM_HUMAN Serine hydroxymethyltransferase, mitochondrial OS=Homo sapiens GN=SHMT2 PE=1 SV=3	504	53565.5	P34897-2;P34897-3;	3	6	12.4			0.99	0.99	0.99				5.642e-09	2.031e-09	1.094e-08			Control2 Only	Control3 Only	Sample1 Only
F5GXS0	F5GXS0_HUMAN Complement C4-B OS=Homo sapiens GN=C4B_2 PE=2 SV=1	1698	193153	P0C0L4;P0C0L4-2;P0C0L5;	3	9	5.5						3						1.523e-08					Sample2 Only
H0YGX7	H0YGX7_HUMAN Rho GDP-dissociation inhibitor 2 (Fragment) OS=Homo sapiens GN=ARHGDIB PE=4 SV=1	195	23027.6	P52566;	3	2	20	Oxidation (M)					2						1.593e-07					Sample2 Only
O43707	ACTN4_HUMAN Alpha-actinin-4 OS=Homo sapiens GN=ACTN4 PE=1 SV=2	911	105059		3	11	11.1	Carbamidomethyl (C),Oxidation (M)					2.98						2.786e-08					Sample2 Only
P24844	MYL9_HUMAN Myosin regulatory light polypeptide 9 OS=Homo sapiens GN=MYL9 PE=1 SV=4	172	19850.5		3	8	54.7	Oxidation (M)		3						2.692e-07					Control2 Only
B4DLW8	B4DLW8_HUMAN Probable ATP-dependent RNA helicase DDX5 OS=Homo sapiens GN=DDX5 PE=2 SV=1	535	69284.8	J3KTA4;P17844;	3	3	5.8		0.99			1.99			9.455e-09			3.178e-08			Control1 Only	Control1 Only	3.36118	Control1 Only	Control1 Only
G3V2X6	G3V2X6_HUMAN Protein arginine N-methyltransferase 5 (Fragment) OS=Homo sapiens GN=PRMT5 PE=2 SV=1	185	20629.3		3	15	91.9	Acetyl (Protein N-term),Carbamidomethyl (C),Oxidation (M)
P04899	GNAI2_HUMAN Guanine nucleotide-binding protein G(i) subunit alpha-2 OS=Homo sapiens GN=GNAI2 PE=1 SV=3	355	41629.7	P04899-4;	3	3	10.7						2.97						6.095e-08					Sample2 Only
Q15758	AAAT_HUMAN Neutral amino acid transporter B(0) OS=Homo sapiens GN=SLC1A5 PE=1 SV=2	541	56724.3		3	3	7.9			1			2			8.836e-09			2.159e-08		Control2 Only			Sample2 Only
Q99575	POP1_HUMAN Ribonucleases P/MRP protein subunit POP1 OS=Homo sapiens GN=POP1 PE=1 SV=2	1024	114942		3	6	6.4	Carbamidomethyl (C)				3						2.507e-08					Sample1 Only
Q9BZE1	RM37_HUMAN 39S ribosomal protein L37, mitochondrial OS=Homo sapiens GN=MRPL37 PE=1 SV=2	423	55061.9	S4R369;	3	3	9.2						3						4.668e-08					Sample2 Only
CONT_FABPH_HUMAN	Possible Contaminant FABPH_HUMAN	132	10181.2	P05413;S4R371;S4R3A2;	3	2	24.7			2			1			1.105e-07			6.025e-08		Control2 Only			Sample2 Only
F5H6T1	F5H6T1_HUMAN Actin-related protein 2 OS=Homo sapiens GN=ACTR2 PE=2 SV=1	305	45455.6	P61160;P61160-2;	3	2	8.5	Oxidation (M)						2						1.664e-08					Sample3 Only
G3V3A0	G3V3A0_HUMAN Alpha-1-antichymotrypsin OS=Homo sapiens GN=SERPINA3 PE=2 SV=1	205	47746.6	G3V5I3;P01011;	3	3	14.1			1			2			1.72e-08			1.094e-07		Control2 Only			Sample2 Only
O95394	AGM1_HUMAN Phosphoacetylglucosamine mutase OS=Homo sapiens GN=PGM3 PE=1 SV=1	542	63063.7	O95394-3;O95394-4;	3	2	3.9			0.99		1.98				4.635e-09		3.343e-08			Control2 Only		Sample1 Only
P62263	RS14_HUMAN 40S ribosomal protein S14 OS=Homo sapiens GN=RPS14 PE=1 SV=3	151	16298.6		3	2	15.9					3						5.93e-07					Sample1 Only
Q96I59	SYNM_HUMAN Probable asparagine--tRNA ligase, mitochondrial OS=Homo sapiens GN=NARS2 PE=1 SV=3	477	54181.8		3	3	5.5					2.97						6.863e-08					Sample1 Only
P33176	KINH_HUMAN Kinesin-1 heavy chain OS=Homo sapiens GN=KIF5B PE=1 SV=1	963	109905		3	3	2.4				1.99			0.99			2.139e-09			1.653e-09		Control3 Only			Sample3 Only
Q7Z4H8	KDEL2_HUMAN KDEL motif-containing protein 2 OS=Homo sapiens GN=KDELC2 PE=1 SV=2	507	58679.3		3	6	12.6	Carbamidomethyl (C)	3						1.071e-07						Control1 Only	Control1 Only	Control1 Only	Control1 Only	Control1 Only
Q14697	GANAB_HUMAN Neutral alpha-glucosidase AB OS=Homo sapiens GN=GANAB PE=1 SV=3	944	107077		3	2	3.5			1		2				2.853e-09		1.871e-08			Control2 Only		Sample1 Only
O15230	LAMA5_HUMAN Laminin subunit alpha-5 OS=Homo sapiens GN=LAMA5 PE=1 SV=8	3695	400577		3	3	0.9					1	1	1				1.055e-09	7.251e-10	5.205e-10			Sample1 Only	Sample2 Only	Sample3 Only
C9JV77	C9JV77_HUMAN Alpha-2-HS-glycoprotein OS=Homo sapiens GN=AHSG PE=2 SV=1	368	39407.8	P02765;	2	2	4.6						2						9.912e-08					Sample2 Only
F5H2X0	F5H2X0_HUMAN Tight junction protein ZO-3 OS=Homo sapiens GN=TJP3 PE=2 SV=1	919	102623	F5H4S9;O95049;O95049-2;O95049-3;O95049-4;	2	3	3.9					2						7.194e-09					Sample1 Only
B4E189	B4E189_HUMAN Condensin complex subunit 2 OS=Homo sapiens GN=NCAPH PE=2 SV=1	605	82727.4	E9PHA2;Q15003;	2	2	3.5					1.98						3.212e-08					Sample1 Only
E7EWT1	E7EWT1_HUMAN Dolichyl-diphosphooligosaccharide--protein glycosyltransferase 48 kDa subunit OS=Homo sapiens GN=DDOST PE=2 SV=1	419	50895	P39656;	2	2	5.3					0.99		1				2.961e-08		2.908e-09			Sample1 Only		Sample3 Only
P02790	HEMO_HUMAN Hemopexin OS=Homo sapiens GN=HPX PE=1 SV=2	462	51769.3		2	2	4.8						2						7.461e-08					Sample2 Only
H7C086	H7C086_HUMAN ATP synthase subunit O, mitochondrial (Fragment) OS=Homo sapiens GN=ATP5O PE=4 SV=1	74	23316.7	P48047;	2	2	33.8			2						3.126e-07					Control2 Only
F8W845	F8W845_HUMAN Catenin alpha-1 OS=Homo sapiens GN=CTNNA1 PE=2 SV=1	803	102841	G3XAM7;P35221;P35221-2;	2	2	3.1							1.98						3.12e-09					Sample3 Only
O00299	CLIC1_HUMAN Chloride intracellular channel protein 1 OS=Homo sapiens GN=CLIC1 PE=1 SV=4	241	26977.8		2	2	12.4						2						4.958e-08					Sample2 Only
B4DFA2	B4DFA2_HUMAN Vesicle-fusing ATPase OS=Homo sapiens GN=NSF PE=2 SV=1	644	82758.2	I3L0N3;P46459;	2	2	3.4			1		0.99				6.625e-09		6.404e-09			Control2 Only		Sample1 Only
B0YIW6	B0YIW6_HUMAN Archain 1, isoform CRA_a OS=Homo sapiens GN=ARCN1 PE=2 SV=1	552	47300.8	P48444;P48444-2;	2	2	4.7					1		1				1.139e-08		5.876e-09			Sample1 Only		Sample3 Only
F6SBX2	F6SBX2_HUMAN Isoleucine--tRNA ligase, mitochondrial OS=Homo sapiens GN=IARS2 PE=2 SV=1	940	114007	Q9NSE4;	2	3	3.5	Carbamidomethyl (C),Oxidation (M)						2						3.386e-09					Sample3 Only
F5H5N0	F5H5N0_HUMAN Serine/threonine-protein kinase MRCK alpha OS=Homo sapiens GN=CDC42BPA PE=2 SV=1	1699	203206	Q5VT25;Q5VT25-2;Q5VT25-3;Q5VT25-4;Q5VT25-5;Q5VT25-6;	2	2	1.7					2						3.665e-09					Sample1 Only
M0R009	M0R009_HUMAN Alpha-1B-glycoprotein (Fragment) OS=Homo sapiens GN=A1BG PE=2 SV=1	306	54363.6	P04217;	2	2	7.8						2						2.816e-08					Sample2 Only
H7C3Q8	H7C3Q8_HUMAN Arf-GAP with coiled-coil, ANK repeat and PH domain-containing protein 2 (Fragment) OS=Homo sapiens GN=ACAP2 PE=4 SV=1	256	88189.3	Q15057;	2	2	7			1				1		7.723e-09				2.082e-08	Control2 Only				Sample3 Only
Q14258	TRI25_HUMAN E3 ubiquitin/ISG15 ligase TRIM25 OS=Homo sapiens GN=TRIM25 PE=1 SV=2	630	71107.8		2	5	8.6			2						3.404e-08					Control2 Only
F8WCF6	F8WCF6_HUMAN Actin-related protein 2/3 complex subunit 4 OS=Homo sapiens GN=ARPC4 PE=2 SV=1	181	21628.2	F8WDD7;H7C0A3;P59998;P59998-2;P59998-3;	2	2	19.5						2						1.351e-07					Sample2 Only
P01764	HV303_HUMAN Ig heavy chain V-III region VH26 OS=Homo sapiens PE=1 SV=1	117	12592.2		2	2	25.6	Oxidation (M)					2						2.203e-07					Sample2 Only
E9PE17	E9PE17_HUMAN 28S ribosomal protein S17, mitochondrial (Fragment) OS=Homo sapiens GN=MRPS17 PE=2 SV=1	129	14529	I3L0E3;Q9Y2R5;	2	2	14			2						1.05e-07					Control2 Only
D6RGE5	D6RGE5_HUMAN Casein kinase I isoform alpha OS=Homo sapiens GN=CSNK1A1 PE=2 SV=2	89	37633.2	E5RG27;P48729;P48729-2;Q71TU5;	2	2	21.8						1.99						4.168e-07					Sample2 Only
B4DN45	B4DN45_HUMAN S-adenosylmethionine synthase OS=Homo sapiens GN=MAT2A PE=2 SV=1	299	43741.4	P31153;	2	2	10				1	1					2.452e-08	6.56e-08				Control3 Only	Sample1 Only
P22894	MMP8_HUMAN Neutrophil collagenase OS=Homo sapiens GN=MMP8 PE=1 SV=1	467	53504.6		2	2	4.7						2						5.987e-08					Sample2 Only
H0Y3Y9	H0Y3Y9_HUMAN 26S proteasome non-ATPase regulatory subunit 4 (Fragment) OS=Homo sapiens GN=PSMD4 PE=4 SV=1	193	41161.4	P55036;Q5VWC4;	2	2	8.8	Oxidation (M)			1	0.99					7.016e-09	6.36e-08				Control3 Only	Sample1 Only
B4E3P0	B4E3P0_HUMAN ATP-citrate synthase OS=Homo sapiens GN=ACLY PE=2 SV=1	830	120020	P53396;P53396-2;	2	3	4					2						1.421e-08					Sample1 Only
C9JZR2	C9JZR2_HUMAN Catenin delta-1 OS=Homo sapiens GN=CTNND1 PE=2 SV=2	938	102270	O60716;O60716-10;O60716-11;O60716-12;O60716-13;O60716-14;O60716-15;O60716-16;O60716-17;O60716-18;O60716-19;O60716-2;O60716-20;O60716-21;O60716-22;O60716-23;O60716-24;O60716-3;O60716-4;O60716-5;O60716-6;O60716-7;O60716-8;O60716-9;	2	2	2					1.98						1.842e-08					Sample1 Only
Q8NB46	ANR52_HUMAN Serine/threonine-protein phosphatase 6 regulatory ankyrin repeat subunit C OS=Homo sapiens GN=ANKRD52 PE=1 SV=3	1076	115310		2	3	2.7	Carbamidomethyl (C)				2						1.023e-08					Sample1 Only
Q01518	CAP1_HUMAN Adenylyl cyclase-associated protein 1 OS=Homo sapiens GN=CAP1 PE=1 SV=5	475	51923.7	Q01518-2;	2	5	9.9	Carbamidomethyl (C)		0.99			0.99			1.261e-08			7.565e-09		Control2 Only			Sample2 Only
P49406	RM19_HUMAN 39S ribosomal protein L19, mitochondrial OS=Homo sapiens GN=MRPL19 PE=1 SV=2	292	16628.9	S4R3W9;	2	2	11.9						2						5.83e-08					Sample2 Only
B3KQF6	B3KQF6_HUMAN Vacuolar protein sorting 33B (Yeast), isoform CRA_b OS=Homo sapiens GN=VPS33B PE=2 SV=1	526	70720.5	F5H008;Q9H267;	2	2	3.4					2						1.63e-08					Sample1 Only
O00567	NOP56_HUMAN Nucleolar protein 56 OS=Homo sapiens GN=NOP56 PE=1 SV=4	594	31305.5	Q5JXT2;	2	2	7.1					2						2.066e-08					Sample1 Only
Q6UX06	OLFM4_HUMAN Olfactomedin-4 OS=Homo sapiens GN=OLFM4 PE=1 SV=1	510	57387.9		2	2	5.1						2						3.263e-08					Sample2 Only
E9PK47	E9PK47_HUMAN Phosphorylase OS=Homo sapiens GN=PYGL PE=2 SV=1	819	93309.2	P06737;P06737-2;	2	5	6.4						2						1.024e-08					Sample2 Only
B4DET3	B4DET3_HUMAN Niemann-Pick C1 protein OS=Homo sapiens GN=NPC1 PE=2 SV=1	960	142452	K7EQ23;O15118;	2	2	1.4	Oxidation (M)			2						4.287e-09					Control3 Only
P0C0S5	H2AZ_HUMAN Histone H2A.Z OS=Homo sapiens GN=H2AFZ PE=1 SV=2	128	13536.5	Q71UI9;	2	3	23.4						0.99						5.103e-08					Sample2 Only
P31946	1433B_HUMAN 14-3-3 protein beta/alpha OS=Homo sapiens GN=YWHAB PE=1 SV=3	246	8441.24	P31946-2;Q4VY19;Q4VY20;	2	3	39.2						2						8.582e-08					Sample2 Only
P40121	CAPG_HUMAN Macrophage-capping protein OS=Homo sapiens GN=CAPG PE=1 SV=2	348	36923.8	P40121-2;	2	3	10.2						2						4.245e-08					Sample2 Only
C9JZR7	C9JZR7_HUMAN Actin, cytoplasmic 1 (Fragment) OS=Homo sapiens GN=ACTB PE=2 SV=1	103	11404.5		2	11	83.5	Acetyl (Protein N-term),Carbamidomethyl (C),Oxidation (M)					2						9.207e-07					Sample2 Only
P80748	LV302_HUMAN Ig lambda chain V-III region LOI OS=Homo sapiens PE=1 SV=1	111	11945.8		2	2	21.6						2						4.144e-07					Sample2 Only
Q13127	REST_HUMAN RE1-silencing transcription factor OS=Homo sapiens GN=REST PE=1 SV=3	1097	119314	Q13127-4;	2	2	2.8	Carbamidomethyl (C)						2						3.517e-09					Sample3 Only
Q53G59	KLH12_HUMAN Kelch-like protein 12 OS=Homo sapiens GN=KLHL12 PE=1 SV=2	568	67863.7	Q53G59-2;	2	3	6.2			1.98						2.423e-08					Control2 Only
Q7Z2W9	RM21_HUMAN 39S ribosomal protein L21, mitochondrial OS=Homo sapiens GN=MRPL21 PE=1 SV=2	205	13755.7	Q7Z2W9-2;	2	2	24.2						1.99						1.069e-07					Sample2 Only
Q13885	TBB2A_HUMAN Tubulin beta-2A chain OS=Homo sapiens GN=TUBB2A PE=1 SV=1	445	50001		2	26	60.9	Carbamidomethyl (C),Glu->pyro-Glu (N-term E),Oxidation (M)				1	1					4.737e-08	3.451e-08				Sample1 Only	Sample2 Only
P04350	TBB4A_HUMAN Tubulin beta-4A chain OS=Homo sapiens GN=TUBB4A PE=1 SV=2	444	49680		2	25	76.8	Carbamidomethyl (C),Glu->pyro-Glu (N-term E),Oxidation (M)					2						5.853e-08					Sample2 Only
E7ENJ6	E7ENJ6_HUMAN AP-1 complex subunit mu-1 OS=Homo sapiens GN=AP1M1 PE=2 SV=1	370	49934.8	Q9BXS5;Q9BXS5-2;	2	5	13.5	Acetyl (Protein N-term),Oxidation (M)		0.99		0.99				1.294e-08		5.034e-08			Control2 Only		Sample1 Only
E1P5S2	E1P5S2_HUMAN RNA-binding protein 39 OS=Homo sapiens GN=RBM39 PE=2 SV=1	373	57198.5	G3XAC6;H0Y4X3;Q14498;Q14498-2;Q14498-3;	2	2	8					2						3.839e-08					Sample1 Only
A8MXP9	A8MXP9_HUMAN Matrin-3 OS=Homo sapiens GN=MATR3 PE=2 SV=1	895	94816.9	D6R991;D6REM6;P43243;	2	4	10.9					2						1.926e-08					Sample1 Only
H0Y512	H0Y512_HUMAN Adipocyte plasma membrane-associated protein (Fragment) OS=Homo sapiens GN=APMAP PE=4 SV=1	409	32212.8	Q9HDC9;Q9HDC9-2;	2	2	8						2						2.975e-08					Sample2 Only
B4DXI8	B4DXI8_HUMAN 26S proteasome non-ATPase regulatory subunit 7 OS=Homo sapiens GN=PSMD7 PE=2 SV=1	247	37092.6	P51665;	2	2	10.1							2						2.584e-08					Sample3 Only
P00352	AL1A1_HUMAN Retinal dehydrogenase 1 OS=Homo sapiens GN=ALDH1A1 PE=1 SV=2	501	54971		2	2	3.6						2						3.085e-08					Sample2 Only
Q9Y5V3	MAGD1_HUMAN Melanoma-associated antigen D1 OS=Homo sapiens GN=MAGED1 PE=1 SV=3	778	92135.2	Q9Y5V3-2;	2	3	3.5						2						1.562e-08					Sample2 Only
O75594	PGRP1_HUMAN Peptidoglycan recognition protein 1 OS=Homo sapiens GN=PGLYRP1 PE=1 SV=1	196	21770.7		1	2	12.2	Carbamidomethyl (C)					1						2.897e-08					Sample2 Only
P23083	HV103_HUMAN Ig heavy chain V-I region V35 OS=Homo sapiens PE=1 SV=1	117	13018.4		1	2	20.5	Gln->pyro-Glu (N-term Q)					1						1.106e-07					Sample2 Only
A6NG51	A6NG51_HUMAN Spectrin alpha chain, non-erythrocytic 1 OS=Homo sapiens GN=SPTAN1 PE=2 SV=2	2477	282828	Q13813;Q13813-2;Q13813-3;	1	5	2.3			1						1.016e-09					Control2 Only
P01023	A2MG_HUMAN Alpha-2-macroglobulin OS=Homo sapiens GN=A2M PE=1 SV=3	1474	163620		1	2	1.5						1						6.587e-09					Sample2 Only
B4DZ61	B4DZ61_HUMAN Valine--tRNA ligase OS=Homo sapiens GN=VARS PE=2 SV=1	297	140766	P26640;	1	2	9.1					1						5.47e-09					Sample1 Only
B7Z1R5	B7Z1R5_HUMAN V-type proton ATPase catalytic subunit A OS=Homo sapiens GN=ATP6V1A PE=2 SV=1	584	68440.6	P38606;	1	2	4.6	Oxidation (M)		1						7.042e-09					Control2 Only
O94761	RECQ4_HUMAN ATP-dependent DNA helicase Q4 OS=Homo sapiens GN=RECQL4 PE=1 SV=1	1208	133344	U3KQ17;	1	2	2.2	Carbamidomethyl (C)				1						1.087e-08					Sample1 Only
P06858	LIPL_HUMAN Lipoprotein lipase OS=Homo sapiens GN=LPL PE=1 SV=1	475	53255		1	2	7.6			1						1.545e-08					Control2 Only
Q9P2E3	ZNFX1_HUMAN NFX1-type zinc finger-containing protein 1 OS=Homo sapiens GN=ZNFX1 PE=1 SV=2	1918	220643		1	2	1.4					1						1.583e-09					Sample1 Only
Q9C075	K1C23_HUMAN Keratin, type I cytoskeletal 23 OS=Homo sapiens GN=KRT23 PE=1 SV=2	422	48227.3		1	3	5.7	Oxidation (M)		0.99						1.39e-08					Control2 Only
Q9H223	EHD4_HUMAN EH domain-containing protein 4 OS=Homo sapiens GN=EHD4 PE=1 SV=1	541	61298.6		1	2	4.1					1						1.817e-08					Sample1 Only
P14618-2	KPYM_HUMAN Isoform M1 of Pyruvate kinase PKM OS=Homo sapiens GN=PKM	531	58169		1	15	32.4	Carbamidomethyl (C),Oxidation (M)					0.98						1.632e-08					Sample2 Only
E5RGE1	E5RGE1_HUMAN 14-3-3 protein zeta/delta (Fragment) OS=Homo sapiens GN=YWHAZ PE=2 SV=1	52	27799.8	E5RIR4;E7ESK7;E7EVZ2;E7EX29;E9PD24;P63104;	1	3	55.8						1						4.72e-07					Sample2 Only
P31947	1433S_HUMAN 14-3-3 protein sigma OS=Homo sapiens GN=SFN PE=1 SV=1	248	24375	P31947-2;	1	3	13.4						1						1.18e-08					Sample2 Only
P62258	1433E_HUMAN 14-3-3 protein epsilon OS=Homo sapiens GN=YWHAE PE=1 SV=1	255	29227.5		1	3	10.2						0.99						3.119e-08					Sample2 Only
CONT_K2M3_SHEEP	Possible Contaminant K2M3_SHEEP	502	55910.6	CONT_KRHB5_HUMAN;P78386;	1	2	3.6			1						3.984e-08					Control2 Only
Q14CN4	K2C72_HUMAN Keratin, type II cytoskeletal 72 OS=Homo sapiens GN=KRT72 PE=1 SV=2	511	51217.9	Q14CN4-2;Q14CN4-3;	1	9	14.9	Oxidation (M)			0.99						5.418e-09					Control3 Only
P16989	YBOX3_HUMAN Y-box-binding protein 3 OS=Homo sapiens GN=YBX3 PE=1 SV=4	372	37088.6	P16989-2;P16989-3;	1	6	19.8					1						2.968e-08					Sample1 Only
DECOY1_74907	DECOY Group 1 Number 74907	6885	800433	DECOY2_26702;DECOY2_74908;	1	3	0.4	Oxidation (M)					1						1.435e-09					Sample2 Only

## Sheet: 2) Cyto_Endog_non
Supplemental Table 2. Cytoplasmic Endogenous non-RNase
									SPECTRAL COUNTS						SPECTRAL INDEX (MIC SIn)						RATIOS
Protein	Description	Length (AA)	mw (Da)	Indistinguishable Proteins	PSMs	Peptide Seqs	% Coverage	Modifications Observed	Control1	Control2	Control3	Sample1	Sample2	Sample3	Control1	Control2	Control3	Sample1	Sample2	Sample3	Control2/Control1	Control3/Control1	Sample1/Control1	Sample2/Control1	Sample3/Control1
Q9UKV8	AGO2_HUMAN Protein argonaute-2 OS=Homo sapiens GN=AGO2 PE=1 SV=3	859	97398		1457	68	81.6	Acetylation (Protein N-term),Carbamidomethyl (C),Gln->pyro-Glu (N-term Q),Glu->pyro-Glu (N-term E),Oxidation (M)				316.44	527.4	559.9				2.083e-05	7.105e-05	9.349e-05			Sample1 Only	Sample2 Only	Sample3 Only
P01625	KV402_HUMAN Ig kappa chain V-IV region Len OS=Homo sapiens PE=1 SV=2	114	14992.5	P06312;P06313;P06314;	59	3	27.2		18	19	23		1		1.503e-05	4.964e-05	5.691e-05		1.892e-07		3.30273	3.78643	Control1 Only	0.0125882	Control1 Only
P01605	KV113_HUMAN Ig kappa chain V-I region Lay OS=Homo sapiens PE=1 SV=1	108	11844.8		64	2	25	Oxidation (M)	20	21	22		1	1	1.391e-05	4.777e-05	4.723e-05		2.428e-07	2.047e-07	3.43422	3.3954	Control1 Only	0.0174551	0.014716
P01614	KV201_HUMAN Ig kappa chain V-II region Cum OS=Homo sapiens PE=1 SV=1	115	12674.3	P01617;P06309;	53	3	20.4		14	11	12	6	5	5	3.57e-05	0.000123	0.0001081	9.255e-07	4.115e-06	3.54e-06	3.44538	3.02801	0.0259244	0.115266	0.0991597
P01764	HV303_HUMAN Ig heavy chain V-III region VH26 OS=Homo sapiens PE=1 SV=1	117	12592.2		48	3	24.8	Carbamidomethyl (C),Oxidation (M)	8.14	16.42	17.42				1.742e-06	1.265e-05	1.102e-05				7.26177	6.32606	Control1 Only	Control1 Only	Control1 Only
Q9H9G7	AGO3_HUMAN Protein argonaute-3 OS=Homo sapiens GN=AGO3 PE=1 SV=2	860	97550.1		275	53	65.7	Acetylation (Protein N-term),Carbamidomethyl (C),Gln->pyro-Glu (N-term Q),Oxidation (M)				44.5	107	116.5				1.165e-06	4.556e-06	6.442e-06			Sample1 Only	Sample2 Only	Sample3 Only
P13646	K1C13_HUMAN Keratin, type I cytoskeletal 13 OS=Homo sapiens GN=KRT13 PE=1 SV=4	458	49683.5		196	42	72.7	Carbamidomethyl (C),Gln->pyro-Glu (N-term Q),Glu->pyro-Glu (N-term E),Oxidation (M)	5.89	3.96	1.97	19.73	23.74	134.25	1.719e-06	4.59e-08	1.756e-07	1.954e-06	1.11e-06	3.236e-05	0.0267016	0.102152	1.13671	0.645724	18.8249
P12035	K2C3_HUMAN Keratin, type II cytoskeletal 3 OS=Homo sapiens GN=KRT3 PE=1 SV=3	628	64557.7		69	51	67	Carbamidomethyl (C),Oxidation (M)				3	2	64				3.77e-08	2.123e-08	5.111e-06			Sample1 Only	Sample2 Only	Sample3 Only
P19013	K2C4_HUMAN Keratin, type II cytoskeletal 4 OS=Homo sapiens GN=KRT4 PE=1 SV=4	534	57393.9		104	47	67.2	Carbamidomethyl (C),Gln->pyro-Glu (N-term Q),Oxidation (M)				11.99	11.98	79.92				2.318e-07	3.281e-07	4.205e-06			Sample1 Only	Sample2 Only	Sample3 Only
Q9UPY3	DICER_HUMAN Endoribonuclease Dicer OS=Homo sapiens GN=DICER1 PE=1 SV=3	1922	219119		323	67	39.1	Carbamidomethyl (C),Gln->pyro-Glu (N-term Q),Oxidation (M)				55.91	129.74	136.69				3.385e-07	1.285e-06	1.669e-06			Sample1 Only	Sample2 Only	Sample3 Only
Q15633	TRBP2_HUMAN RISC-loading complex subunit TARBP2 OS=Homo sapiens GN=TARBP2 PE=1 SV=3	366	36982.8	Q15633-2;	29	5	18.8					11.88	6.93	9.9				5.48e-07	1.08e-06	1.511e-06			Sample1 Only	Sample2 Only	Sample3 Only
P01781	HV320_HUMAN Ig heavy chain V-III region GAL OS=Homo sapiens PE=1 SV=1	116	12740.2		13	2	15.5	Oxidation (M)	3	5	5				1.902e-07	9.466e-07	7.936e-07				4.97687	4.17245	Control1 Only	Control1 Only	Control1 Only
P01763	HV302_HUMAN Ig heavy chain V-III region WEA OS=Homo sapiens PE=1 SV=1	114	12389.2	P01766;P01767;	9	2	15.8	Carbamidomethyl (C)	1	5	3				1.088e-07	8.563e-07	6.437e-07				7.8704	5.91636	Control1 Only	Control1 Only	Control1 Only
Q9UL18	AGO1_HUMAN Protein argonaute-1 OS=Homo sapiens GN=AGO1 PE=1 SV=3	857	97404.3		75	41	57.9	Acetylation (Protein N-term),Carbamidomethyl (C),Oxidation (M)				4	33	39				4.205e-08	6.71e-07	1.139e-06			Sample1 Only	Sample2 Only	Sample3 Only
Q8NDV7	TNR6A_HUMAN Trinucleotide repeat-containing gene 6A protein OS=Homo sapiens GN=TNRC6A PE=1 SV=2	1962	205584	Q8NDV7-2;Q8NDV7-5;Q8NDV7-6;	129	29	20.8	Carbamidomethyl (C),Oxidation (M)				13.5	34.5	59.5				1.175e-07	4.239e-07	1.016e-06			Sample1 Only	Sample2 Only	Sample3 Only
P35321	SPR1A_HUMAN Cornifin-A OS=Homo sapiens GN=SPRR1A PE=1 SV=2	89	9888.89		8	4	61.8	Carbamidomethyl (C)					1	6.97					6.192e-08	1.488e-06				Sample2 Only	Sample3 Only
P01765	HV304_HUMAN Ig heavy chain V-III region TIL OS=Homo sapiens PE=1 SV=1	115	12366.1		3	3	19.1	Carbamidomethyl (C)	1	1	1				2.417e-07	4.429e-07	2.916e-07				1.83244	1.20645	Control1 Only	Control1 Only	Control1 Only
P01620	KV302_HUMAN Ig kappa chain V-III region SIE OS=Homo sapiens PE=1 SV=1	109	14116.1	P01623;P18135;P18136;	15	2	22.9		3.97	3.97	4.97		0.99	0.99	6.439e-07	1.768e-06	2.346e-06		1.328e-07	1.243e-07	2.74577	3.64342	Control1 Only	0.206243	0.193042
Q9UPQ9	TNR6B_HUMAN Trinucleotide repeat-containing gene 6B protein OS=Homo sapiens GN=TNRC6B PE=1 SV=4	1833	194424		149	34	24.8	Carbamidomethyl (C),Gln->pyro-Glu (N-term Q),Oxidation (M)				8.9	46.43	91.89				2.949e-08	2.263e-07	6.893e-07			Sample1 Only	Sample2 Only	Sample3 Only
G3XAB8	G3XAB8_HUMAN Trinucleotide repeat containing 6C, isoform CRA_a OS=Homo sapiens GN=TNRC6C PE=2 SV=1	1726	179716		102	22	18.5	Acetylation (Protein N-term),Gln->pyro-Glu (N-term Q),Oxidation (M)				12	32	57.99				6.631e-08	2.215e-07	5.7e-07			Sample1 Only	Sample2 Only	Sample3 Only
Q01469	FABP5_HUMAN Fatty acid-binding protein, epidermal OS=Homo sapiens GN=FABP5 PE=1 SV=3	135	15190.6		9	5	38.5	Acetylation (Protein N-term),Carbamidomethyl (C)					3	6					3.681e-07	4.822e-07				Sample2 Only	Sample3 Only
J3KQS6	J3KQS6_HUMAN BRISC and BRCA1-A complex member 1 OS=Homo sapiens GN=BABAM1 PE=2 SV=1	329	18645	M0QX07;M0QY17;M0R0I0;M0R193;M0R2A4;M0R2K3;M0R3F4;Q9NWV8;Q9NWV8-3;	8	3	55.6	Acetylation (Protein N-term),Oxidation (M)				1.98	1.98	3.96				7.009e-08	2.428e-07	3.33e-07			Sample1 Only	Sample2 Only	Sample3 Only
CONT_CAS2_BOVIN	Possible Contaminant CAS2_BOVIN	222	26056.3		177	18	54.5	Carbamidomethyl (C),Oxidation (M)	20	72	27	12	17	29	3.623e-06	3.107e-05	4.091e-06	6.31e-07	1.85e-06	2.763e-06	8.57577	1.12917	0.174165	0.510627	0.762628
CONT_THIO_HUMAN	Possible Contaminant THIO_HUMAN	104	9463.7	P10599;P10599-2;	4	2	25.9						2	2					3.058e-07	2.71e-07				Sample2 Only	Sample3 Only
H7C269	H7C269_HUMAN Trinucleotide repeat-containing gene 6A protein (Fragment) OS=Homo sapiens GN=TNRC6A PE=2 SV=1	906	98839.5		46	14	19.5	Oxidation (M)				4.5	6.5	13.5				5.544e-08	1.651e-07	3.559e-07			Sample1 Only	Sample2 Only	Sample3 Only
H9KVA9	H9KVA9_HUMAN Lys-63-specific deubiquitinase BRCC36 OS=Homo sapiens GN=BRCC3 PE=2 SV=1	317	33287.8	P46736;P46736-2;P46736-3;	8	6	22.7	Carbamidomethyl (C),Oxidation (M)				0.99	1.98	4.95				3.669e-08	1.13e-07	4.263e-07			Sample1 Only	Sample2 Only	Sample3 Only
P47929	LEG7_HUMAN Galectin-7 OS=Homo sapiens GN=LGALS7 PE=1 SV=2	136	15101.8		8	4	39					2	2	5				2.913e-08	1.219e-07	4.141e-07			Sample1 Only	Sample2 Only	Sample3 Only
F8W733	F8W733_HUMAN BRCA1-A complex subunit BRE (Fragment) OS=Homo sapiens GN=BRE PE=2 SV=1	284	42778.3	Q9NXR7;Q9NXR7-1;Q9NXR7-3;Q9NXR7-4;	7	2	9.9	Oxidation (M)				3	1	3				1.03e-07	6.479e-08	3.218e-07			Sample1 Only	Sample2 Only	Sample3 Only
CONT_CAS1_BOVIN	Possible Contaminant CAS1_BOVIN	214	24567.5		232	12	46.3	Glu->pyro-Glu (N-term E),Oxidation (M)	45	69	39	20	27	33	1.776e-05	6.948e-05	1.646e-05	2.683e-06	6.692e-06	9.19e-06	3.91216	0.926802	0.15107	0.376802	0.517455
Q13257	MD2L1_HUMAN Mitotic spindle assembly checkpoint protein MAD2A OS=Homo sapiens GN=MAD2L1 PE=1 SV=1	205	23549.3		3	2	8.8					0.99	1	1				3.877e-08	1.316e-07	1.555e-07			Sample1 Only	Sample2 Only	Sample3 Only
Q9HCK5	AGO4_HUMAN Protein argonaute-4 OS=Homo sapiens GN=AGO4 PE=1 SV=2	861	97286.8		17	23	28.8	Carbamidomethyl (C),Oxidation (M)					7	10					9.292e-08	1.995e-07				Sample2 Only	Sample3 Only
P31947	1433S_HUMAN 14-3-3 protein sigma OS=Homo sapiens GN=SFN PE=1 SV=1	248	24375	P31947-2;	9	8	34.3	Carbamidomethyl (C)					1	8					4.041e-08	2.384e-07				Sample2 Only	Sample3 Only
P30041	PRDX6_HUMAN Peroxiredoxin-6 OS=Homo sapiens GN=PRDX6 PE=1 SV=3	224	25073.2		6	3	19.6	Carbamidomethyl (C)				1	1	4				4.571e-08	2.513e-08	2.071e-07			Sample1 Only	Sample2 Only	Sample3 Only
Q5JXJ0	Q5JXJ0_HUMAN Mitochondrial ribosome-associated GTPase 2 (Fragment) OS=Homo sapiens GN=MTG2 PE=2 SV=1	233	44036.1	Q9H4K7;	3	2	6.9					1	1	1				5.371e-08	7.849e-08	1.432e-07			Sample1 Only	Sample2 Only	Sample3 Only
P08123	CO1A2_HUMAN Collagen alpha-2(I) chain OS=Homo sapiens GN=COL1A2 PE=1 SV=7	1366	129632		8	6	3.9			7	1					1.591e-07	6.583e-08				Control2 Only	Control3 Only
O96007	MOC2B_HUMAN Molybdopterin synthase catalytic subunit OS=Homo sapiens GN=MOCS2 PE=1 SV=1	188	20984.8		3	2	18.6		2		1				1.119e-07		8.015e-08				Control1 Only	0.716265	Control1 Only	Control1 Only	Control1 Only
Q15018	F175B_HUMAN BRISC complex subunit Abro1 OS=Homo sapiens GN=FAM175B PE=1 SV=2	415	46980		6	4	11.8	Carbamidomethyl (C)					4	2					1.601e-07	6.888e-08				Sample2 Only	Sample3 Only
CONT_ALBU_HUMAN	Possible Contaminant ALBU_HUMAN	609	69501.6	P02768;	51	20	30.4	Carbamidomethyl (C),Oxidation (M)	1.96	0.98	0.98	34.33	8.83	2.95	4.368e-08	3.938e-08	1.436e-08	1.152e-06	3.058e-07	9.143e-08	0.901557	0.328755	26.3736	7.00092	2.09318
CONT_CASB_BOVIN	Possible Contaminant CASB_BOVIN	224	25145.3		151	8	32.1	Oxidation (M)	25	37	27	21	20	22	8.863e-06	7.616e-05	2.069e-05	3.478e-06	7.506e-06	1.039e-05	8.59303	2.33442	0.392418	0.846892	1.17229
Q08188	TGM3_HUMAN Protein-glutamine gamma-glutamyltransferase E OS=Homo sapiens GN=TGM3 PE=1 SV=4	693	76781.7		17	9	17.3	Carbamidomethyl (C),Oxidation (M)			1		2	14			2.861e-09		2.27e-08	2.117e-07		Control3 Only		Sample2 Only	Sample3 Only
P05109	S10A8_HUMAN Protein S100-A8 OS=Homo sapiens GN=S100A8 PE=1 SV=1	93	10845.7		20	6	57	Carbamidomethyl (C),Oxidation (M)	1	1	4		5	9	3.317e-08	7.68e-08	2.075e-07		1.068e-06	2.166e-06	2.31535	6.25565	Control1 Only	32.1978	65.3
P61026	RAB10_HUMAN Ras-related protein Rab-10 OS=Homo sapiens GN=RAB10 PE=1 SV=1	200	22580.6		3	3	17					2	1					6.678e-08	6.918e-08				Sample1 Only	Sample2 Only
P11413	G6PD_HUMAN Glucose-6-phosphate 1-dehydrogenase OS=Homo sapiens GN=G6PD PE=1 SV=4	515	62590.7	P11413-2;P11413-3;	3	3	7		2	1	1				3.554e-08	3.788e-08	3.811e-08				1.06584	1.07231	Control1 Only	Control1 Only	Control1 Only
Q9H7D7	WDR26_HUMAN WD repeat-containing protein 26 OS=Homo sapiens GN=WDR26 PE=1 SV=3	661	70595.8	Q9H7D7-2;	8	4	7.1		0.99	3.96	2.97				6.625e-09	5.216e-08	4.478e-08				7.87321	6.75925	Control1 Only	Control1 Only	Control1 Only
P40938	RFC3_HUMAN Replication factor C subunit 3 OS=Homo sapiens GN=RFC3 PE=1 SV=2	356	34824	P40938-2;	3	2	9.2		2		1				3.029e-08		5.02e-08				Control1 Only	1.65731	Control1 Only	Control1 Only	Control1 Only
CONT_LYSC_HUMAN	Possible Contaminant LYSC_HUMAN	148	16562.3	P61626;	29	7	48.6	Carbamidomethyl (C)	3	1		8	4	13	2.707e-07	3.484e-08		4.803e-07	2.877e-07	1.826e-06	0.128703	Control1 Only	1.77429	1.0628	6.74547
Q13835	PKP1_HUMAN Plakophilin-1 OS=Homo sapiens GN=PKP1 PE=1 SV=2	747	80661.6	Q13835-2;	11	6	9.9	Carbamidomethyl (C),Oxidation (M)			1		6	4			4.538e-09		8.658e-08	4.714e-08		Control3 Only		Sample2 Only	Sample3 Only
E7ERK9	E7ERK9_HUMAN Translation initiation factor eIF-2B subunit delta OS=Homo sapiens GN=EIF2B4 PE=2 SV=1	544	57566.3	Q9UI10;Q9UI10-2;Q9UI10-3;	2	2	5					1		1				1.272e-08		4.723e-08			Sample1 Only		Sample3 Only
Q16204	CCDC6_HUMAN Coiled-coil domain-containing protein 6 OS=Homo sapiens GN=CCDC6 PE=1 SV=2	474	53383.9		5	4	8.4		2	2	1	1			3.096e-08	1.259e-07	8.101e-08	1.752e-08			4.06654	2.6166	0.565891	Control1 Only	Control1 Only
Q7L775	EPMIP_HUMAN EPM2A-interacting protein 1 OS=Homo sapiens GN=EPM2AIP1 PE=1 SV=1	607	70505.2		2	2	3.5					1		1				1.279e-08		2.894e-08			Sample1 Only		Sample3 Only
P00367	DHE3_HUMAN Glutamate dehydrogenase 1, mitochondrial OS=Homo sapiens GN=GLUD1 PE=1 SV=2	558	61521.3		7	5	9	Oxidation (M)	0.99	1.98	4.97		0.99		1.889e-08	7.049e-08	2.314e-07		3.292e-08		3.7316	12.2499	Control1 Only	1.74272	Control1 Only
P01859	IGHG2_HUMAN Ig gamma-2 chain C region OS=Homo sapiens GN=IGHG2 PE=1 SV=2	326	35967.8		16	5	12.6	Carbamidomethyl (C),Oxidation (M)	1	2	1	2	5	5	3.224e-08	1.938e-07	5.846e-08	8.326e-08	9.104e-07	8.971e-07	6.01117	1.81328	2.58251	28.2382	27.8257
B4DRF4	B4DRF4_HUMAN Very-long-chain (3R)-3-hydroxyacyl-[acyl-carrier protein] dehydratase 3 OS=Homo sapiens GN=PTPLAD1 PE=2 SV=1	307	43239.6	Q9P035;	6	4	12.1		3	1		2			1.484e-07	1.847e-07		3.987e-08			1.24461	Control1 Only	0.268666	Control1 Only	Control1 Only
Q96AG4	LRC59_HUMAN Leucine-rich repeat-containing protein 59 OS=Homo sapiens GN=LRRC59 PE=1 SV=1	307	34998.9		5	2	7.2		2	1	1	1			7.764e-08	7.637e-08	8.293e-08	2.588e-08			0.983642	1.06813	0.333333	Control1 Only	Control1 Only
P54652	HSP72_HUMAN Heat shock-related 70 kDa protein 2 OS=Homo sapiens GN=HSPA2 PE=1 SV=1	639	70158		2	16	20		1		1				1.297e-08		9.293e-09				Control1 Only	0.7165	Control1 Only	Control1 Only	Control1 Only
Q9H307	PININ_HUMAN Pinin OS=Homo sapiens GN=PNN PE=1 SV=4	717	67127.3	Q9H307-2;	3	3	5.1					1	1	0.99				4.616e-09	5.958e-09	1.585e-08			Sample1 Only	Sample2 Only	Sample3 Only
P04350	TBB4A_HUMAN Tubulin beta-4A chain OS=Homo sapiens GN=TUBB4A PE=1 SV=2	444	49680		7	26	73	Carbamidomethyl (C),Oxidation (M)		2	1	2	2	1		3.08e-08	8.109e-08	3.158e-07	3.383e-07	1.2e-07	Control2 Only	Control3 Only	Sample1 Only	Sample2 Only	Sample3 Only
CONT_CASK_BOVIN	Possible Contaminant CASK_BOVIN	190	21309.9		100	3	20.5	Carbamidomethyl (C),Oxidation (M)	10	29	19	8	16	19	1.013e-06	1.16e-05	4.775e-06	4.818e-07	1.702e-06	2.408e-06	11.4511	4.71372	0.475617	1.68016	2.3771
B3KQ25	B3KQ25_HUMAN Proteasome activator complex subunit 3 OS=Homo sapiens GN=PSME3 PE=2 SV=1	193	30939.3	K7ENH2;K7ESG5;P61289;P61289-2;	4	2	14.5		1	1	1	1			6.776e-08	1.392e-07	1.382e-07	5.034e-08			2.05431	2.03955	0.742916	Control1 Only	Control1 Only
Q96I99	SUCB2_HUMAN Succinyl-CoA ligase [GDP-forming] subunit beta, mitochondrial OS=Homo sapiens GN=SUCLG2 PE=1 SV=2	432	46607.5		5	3	8.1		1			2	1	1	7.687e-09			2.67e-08	3.068e-08	3.329e-08	Control1 Only	Control1 Only	3.4734	3.99115	4.33069
P60891	PRPS1_HUMAN Ribose-phosphate pyrophosphokinase 1 OS=Homo sapiens GN=PRPS1 PE=1 SV=2	318	34902		8	5	19.5	Oxidation (M)			0.99		2.98	3.96			8.283e-08		2.631e-07	2.864e-07		Control3 Only		Sample2 Only	Sample3 Only
B4DY35	B4DY35_HUMAN Bifunctional methylenetetrahydrofolate dehydrogenase/cyclohydrolase, mitochondrial OS=Homo sapiens GN=MTHFD2 PE=2 SV=1	186	26904.3	B9A062;P13995;Q7Z650;	4	2	12.4		1	2		1			5.592e-08	2.869e-07		5.532e-08			5.13054	Control1 Only	0.98927	Control1 Only	Control1 Only
Q6S8J3	POTEE_HUMAN POTE ankyrin domain family member E OS=Homo sapiens GN=POTEE PE=1 SV=3	1075	121592		7	12	11.1	Carbamidomethyl (C),Gln->pyro-Glu (N-term Q),Oxidation (M)		0.99		4.95		0.99		8.621e-09		6.862e-08		2.143e-08	Control2 Only		Sample1 Only		Sample3 Only
DECOY1_75069	DECOY Group 1 Number 75069	34350	3837800	DECOY1_75071;DECOY1_75073;DECOY1_75075;DECOY1_75077;DECOY1_75079;DECOY1_75081;DECOY2_75070;DECOY2_75072;DECOY2_75074;DECOY2_75076;DECOY2_75078;DECOY2_75080;	28	3	0.1					7	9	12				1.392e-09	6.41e-09	9.476e-09			Sample1 Only	Sample2 Only	Sample3 Only
Q6ZVX7	FBX50_HUMAN F-box only protein 50 OS=Homo sapiens GN=NCCRP1 PE=1 SV=1	275	30899.9		7	2	8.4				1	1	2	3			1.553e-08	1.054e-08	7.186e-08	5.328e-08		Control3 Only	Sample1 Only	Sample2 Only	Sample3 Only
P53597	SUCA_HUMAN Succinyl-CoA ligase [ADP/GDP-forming] subunit alpha, mitochondrial OS=Homo sapiens GN=SUCLG1 PE=1 SV=4	346	36316.9		7	3	10.4	Oxidation (M)	3	1	1	2			5.059e-08	8.165e-08	6.095e-08	3.164e-08			1.61396	1.20478	0.62542	Control1 Only	Control1 Only
K7EKI8	K7EKI8_HUMAN Periplakin OS=Homo sapiens GN=PPL PE=2 SV=1	1754	205145	O60437;	15	14	7.9		2		1		1	10.99	2.337e-09		8.141e-10		1.161e-09	3.471e-08	Control1 Only	0.348353	Control1 Only	0.496791	14.8524
G8JLG2	G8JLG2_HUMAN Corneodesmosin OS=Homo sapiens GN=CDSN PE=2 SV=1	529	51634.3	Q15517;	9	5	13	Carbamidomethyl (C),Oxidation (M)		1	1	1	5	1		4.724e-09	7.544e-09	5.347e-09	8.625e-08	6.469e-09	Control2 Only	Control3 Only	Sample1 Only	Sample2 Only	Sample3 Only
B7ZL00	B7ZL00_HUMAN Protein transport protein Sec31A OS=Homo sapiens GN=SEC31A PE=2 SV=1	1166	131007	D6REX3;D6RHZ5;O94979;O94979-2;O94979-3;O94979-4;O94979-5;O94979-6;O94979-8;O94979-9;	6	3	3.1		0.99	1.98	1.98	0.99			1.12e-09	8.077e-09	7.502e-09	1.082e-09			7.21161	6.69821	0.966071	Control1 Only	Control1 Only
Q9UBV8	PEF1_HUMAN Peflin OS=Homo sapiens GN=PEF1 PE=1 SV=1	284	30433.3		4	2	8.5		1	1	1	1			2.481e-08	2.984e-08	3.042e-08	1.23e-08			1.20274	1.22612	0.495768	Control1 Only	Control1 Only
Q9NQX4	MYO5C_HUMAN Unconventional myosin-Vc OS=Homo sapiens GN=MYO5C PE=1 SV=2	1742	203204		21	16	9.5	Acetylation (Protein N-term),Carbamidomethyl (C),Oxidation (M)	1.99	1	1	12.93		4.95	3.854e-09	1.48e-09	9.785e-10	3.559e-08		1.76e-08	0.384017	0.253892	9.23456	Control1 Only	4.56668
P04080	CYTB_HUMAN Cystatin-B OS=Homo sapiens GN=CSTB PE=1 SV=2	98	11150.6		11	5	79.6	Acetylation (Protein N-term),Carbamidomethyl (C)	2			2		7	3.137e-07			2.421e-07		1.149e-06	Control1 Only	Control1 Only	0.771756	Control1 Only	3.66274
F6RFD5	F6RFD5_HUMAN Destrin OS=Homo sapiens GN=DSTN PE=2 SV=1	135	18529.5	P60981;	6	3	22.2	Acetylation (Protein N-term),Carbamidomethyl (C)	2.98		0.99	1.98			5.953e-07		4.363e-07	2.494e-07			Control1 Only	0.732908	0.418948	Control1 Only	Control1 Only
C9JW96	C9JW96_HUMAN Prohibitin (Fragment) OS=Homo sapiens GN=PHB PE=2 SV=2	246	29857.9	C9JZ20;E7ESE2;E9PCW0;P35232;	8	4	21.4		2	1	2	3	1		6.46e-08	1.935e-08	2.435e-07	5.234e-08	1.546e-08		0.299536	3.76935	0.810217	0.239319	Control1 Only
C9IZE4	C9IZE4_HUMAN 26S proteasome non-ATPase regulatory subunit 6 OS=Homo sapiens GN=PSMD6 PE=2 SV=1	442	45610.3	Q15008;	4	3	10.3		0.99		1.98	0.99			1.289e-08		6.947e-08	1.341e-08			Control1 Only	5.38945	1.04034	Control1 Only	Control1 Only
Q3SYB4	Q3SYB4_HUMAN SERPINB12 protein OS=Homo sapiens GN=SERPINB12 PE=2 SV=1	425	46355.1	Q96P63;	11	5	15.3	Oxidation (M)	1	2	2		7	1	4.583e-09	1.813e-08	1.903e-08		2.136e-07	6.82e-09	3.95592	4.1523	Control1 Only	46.607	1.48811
A6NES3	A6NES3_HUMAN Etoposide-induced protein 2.4 homolog OS=Homo sapiens GN=EI24 PE=2 SV=1	261	39029.7	E9PL33;E9PLB8;E9PM05;O14681;	10	3	25.3		0.99		2	1.99	1.99	2.99	7.367e-08		1.255e-08	1.104e-07	1.383e-07	1.654e-07	Control1 Only	0.170354	1.49857	1.87729	2.24515
Q6UWP8	SBSN_HUMAN Suprabasin OS=Homo sapiens GN=SBSN PE=2 SV=2	590	60666.7		2	2	15.3					1		1				3.444e-09		5.433e-09			Sample1 Only		Sample3 Only
P22059	OSBP1_HUMAN Oxysterol-binding protein 1 OS=Homo sapiens GN=OSBP PE=1 SV=1	807	89598.7		6	3	6.2			2	3		1			1.286e-08	1.964e-08		4.537e-09		Control2 Only	Control3 Only		Sample2 Only
Q9NYL9	TMOD3_HUMAN Tropomodulin-3 OS=Homo sapiens GN=TMOD3 PE=1 SV=1	352	39660.4		30	8	29.8	Oxidation (M)	4.98		1.99	20.97		1.99	9.701e-08		1.017e-07	7.437e-07		8.643e-08	Control1 Only	1.04835	7.66622	Control1 Only	0.890939
Q9BY49	PECR_HUMAN Peroxisomal trans-2-enoyl-CoA reductase OS=Homo sapiens GN=PECR PE=1 SV=2	303	32613.9		8	4	19.5			3	2	1	1	1		4.299e-07	2.387e-07	2.497e-08	5.516e-08	8.855e-08	Control2 Only	Control3 Only	Sample1 Only	Sample2 Only	Sample3 Only
Q92890	UFD1_HUMAN Ubiquitin fusion degradation protein 1 homolog OS=Homo sapiens GN=UFD1L PE=1 SV=3	307	29953.8	Q92890-1;Q92890-3;	8	4	17.3			0.99	0.99		2.97	2.97		1.579e-08	1.786e-08		9.039e-08	8.398e-08	Control2 Only	Control3 Only		Sample2 Only	Sample3 Only
F5H012	F5H012_HUMAN E3 ubiquitin-protein ligase TRIM21 OS=Homo sapiens GN=TRIM21 PE=2 SV=1	475	54261.2	P19474;	15	5	11.2	Carbamidomethyl (C)	2	1		2	5	5	5.315e-08	6.085e-08		6.308e-08	1.988e-07	2.387e-07	1.14487	Control1 Only	1.18683	3.74036	4.49106
E7EW20	E7EW20_HUMAN Unconventional myosin-VI OS=Homo sapiens GN=MYO6 PE=2 SV=1	1286	148943	Q9UM54-6;	149	46	35.4	Carbamidomethyl (C),Gln->pyro-Glu (N-term Q),Oxidation (M)	23.76	10.89	4.95	97.03		12.88	9.926e-08	8.822e-08	1.73e-08	7.349e-07		8.332e-08	0.888777	0.17429	7.40379	Control1 Only	0.839412
Q9NZ08	ERAP1_HUMAN Endoplasmic reticulum aminopeptidase 1 OS=Homo sapiens GN=ERAP1 PE=1 SV=3	941	108043	Q9NZ08-2;	6	4	5			3	1		1	1		4.303e-08	1.22e-08		9.171e-09	1.039e-09	Control2 Only	Control3 Only		Sample2 Only	Sample3 Only
O43852	CALU_HUMAN Calumenin OS=Homo sapiens GN=CALU PE=1 SV=2	315	17664.6	O43852-2;O43852-3;O43852-4;O43852-5;O43852-9;	12	2	11.4		0.99	2.97	3.96	0.99	1.98	0.99	2.445e-08	3.152e-07	4.307e-07	4.093e-08	1.035e-07	6.593e-08	12.8916	17.6155	1.67403	4.23313	2.69652
O00231	PSD11_HUMAN 26S proteasome non-ATPase regulatory subunit 11 OS=Homo sapiens GN=PSMD11 PE=1 SV=3	422	47631.2	O00231-2;	14	6	15.6	Acetylation (Protein N-term)	3	2	4	3		2	7.679e-08	2.015e-07	3.195e-07	5.091e-08		1.124e-07	2.62404	4.1607	0.662977	Control1 Only	1.46373
Q13247	SRSF6_HUMAN Serine/arginine-rich splicing factor 6 OS=Homo sapiens GN=SRSF6 PE=1 SV=2	344	38485.7	Q13247-3;	14	6	13.7		2.99			1.99	3.99	4.98	6.807e-08			3.884e-08	1.474e-07	1.081e-07	Control1 Only	Control1 Only	0.570589	2.16542	1.58807
Q7Z794	K2C1B_HUMAN Keratin, type II cytoskeletal 1b OS=Homo sapiens GN=KRT77 PE=2 SV=3	578	62025.6		51	20	28	Carbamidomethyl (C),Oxidation (M)	4	8	21.5	5	4.5	3.5	4.52e-08	1.325e-07	5.042e-07	4.546e-08	8.324e-08	6.304e-08	2.93142	11.1549	1.00575	1.84159	1.39469
P23528	COF1_HUMAN Cofilin-1 OS=Homo sapiens GN=CFL1 PE=1 SV=3	166	18526.7		10	4	26.5	Acetylation (Protein N-term)	1.98			1.98	4.93	0.98	1.794e-07			1.374e-07	5.054e-07	3.2e-08	Control1 Only	Control1 Only	0.765886	2.81717	0.178372
B7Z3I9	B7Z3I9_HUMAN Delta-aminolevulinic acid dehydratase OS=Homo sapiens GN=ALAD PE=2 SV=1	313	36361.5	P13716;	22	3	14.7	Acetylation (Protein N-term),Oxidation (M)	4.97	3.97	5.96	3.98	0.99	1.98	1.928e-07	6.329e-07	6.847e-07	1.519e-07	8.445e-08	2.342e-07	3.28268	3.55135	0.787863	0.438019	1.21473
Q9UPN9	TRI33_HUMAN E3 ubiquitin-protein ligase TRIM33 OS=Homo sapiens GN=TRIM33 PE=1 SV=3	1127	120789	Q9UPN9-2;	14	7	6.8	Carbamidomethyl (C)		3.99	4.97		1.99	2.99		4.559e-08	5.521e-08		7.359e-09	1.662e-08	Control2 Only	Control3 Only		Sample2 Only	Sample3 Only
P78318	IGBP1_HUMAN Immunoglobulin-binding protein 1 OS=Homo sapiens GN=IGBP1 PE=1 SV=1	339	39287.6		4	2	7.4		1			1	1	1	1.565e-08			1.173e-08	3.076e-08	3.228e-08	Control1 Only	Control1 Only	0.749521	1.9655	2.06262
Q8N335	GPD1L_HUMAN Glycerol-3-phosphate dehydrogenase 1-like protein OS=Homo sapiens GN=GPD1L PE=1 SV=1	351	38484		5	2	5.4		1	1.99	1			0.99	1.885e-08	1.398e-07	4.866e-08			5.594e-08	7.41645	2.58143	Control1 Only	Control1 Only	2.96764
J3QKW2	J3QKW2_HUMAN 28S ribosomal protein S7, mitochondrial OS=Homo sapiens GN=MRPS7 PE=2 SV=1	183	28188	J3QLS3;J3QQS1;Q9Y2R9;	11	2	15.1		2	1	1	1	3	3	6.625e-08	6.689e-08	7.534e-08	2.245e-08	3.208e-07	3.565e-07	1.00966	1.13721	0.338868	4.84226	5.38113
P22314	UBA1_HUMAN Ubiquitin-like modifier-activating enzyme 1 OS=Homo sapiens GN=UBA1 PE=1 SV=3	1058	118081		12	4	6.3			6	4		1	1		3.545e-08	2.975e-08		8.498e-09	7.184e-09	Control2 Only	Control3 Only		Sample2 Only	Sample3 Only
F6S0T5	F6S0T5_HUMAN Lysine-specific histone demethylase 1A OS=Homo sapiens GN=KDM1A PE=2 SV=1	876	95347.8	O60341;O60341-2;	7	4	5.9			2	4		1			2.438e-08	3.536e-08		1.385e-08		Control2 Only	Control3 Only		Sample2 Only
B4DJV2	B4DJV2_HUMAN Citrate synthase OS=Homo sapiens GN=CS PE=2 SV=1	453	51805.6	O75390;	7	3	8.6		2.97	0.99	0.99	0.99	0.99		8.976e-08	8.639e-08	6.35e-08	3.698e-08	3.057e-08		0.962455	0.707442	0.411988	0.340575	Control1 Only
P49642	PRI1_HUMAN DNA primase small subunit OS=Homo sapiens GN=PRIM1 PE=1 SV=1	420	49978.5		23	8	21.4		3	4.98	8.97	2	3.98	1.99	4.132e-08	2.383e-07	3.293e-07	2.812e-08	1.181e-07	4.389e-08	5.76718	7.96951	0.680542	2.85818	1.0622
F8W9S7	F8W9S7_HUMAN GTPase-activating protein and VPS9 domain-containing protein 1 OS=Homo sapiens GN=GAPVD1 PE=2 SV=1	1412	166496	Q14C86;Q14C86-2;Q14C86-3;Q14C86-4;Q14C86-5;Q14C86-6;	10	6	4.9		0.99	2	3.99	1.99		1	6.999e-09	2.276e-08	4.539e-08	1.253e-08		6.252e-09	3.25189	6.48521	1.79026	Control1 Only	0.89327
Q92499	DDX1_HUMAN ATP-dependent RNA helicase DDX1 OS=Homo sapiens GN=DDX1 PE=1 SV=2	740	82595.9		71	21	30.8	Carbamidomethyl (C),Oxidation (M)	8	15	29	4	8	9	1.632e-07	3.255e-07	6.906e-07	6.457e-08	1.212e-07	2.168e-07	1.99449	4.23162	0.39565	0.742647	1.32843
O14965	AURKA_HUMAN Aurora kinase A OS=Homo sapiens GN=AURKA PE=1 SV=2	403	45888.9		32	9	28.3		2.99	6.95	9.91	2.99	2.98	5.95	1.193e-07	6.715e-07	1.217e-06	7.414e-08	2.031e-07	4.4e-07	5.62867	10.2012	0.621459	1.70243	3.68818
K7EIG7	K7EIG7_HUMAN Unconventional myosin-Id OS=Homo sapiens GN=MYO1D PE=2 SV=1	918	116417	O94832;	12	10	11.9	Oxidation (M)		0.99	2.97	3.97	1.98	3.96		4.207e-09	3.103e-08	5.729e-08	1.599e-08	5.944e-08	Control2 Only	Control3 Only	Sample1 Only	Sample2 Only	Sample3 Only
C9JEH3	C9JEH3_HUMAN Angio-associated migratory cell protein OS=Homo sapiens GN=AAMP PE=2 SV=1	435	46847.5	C9JG97;Q13685;	7	2	5.8		0.99	2.97	0.99		0.99	0.99	3.634e-08	2.296e-07	6.585e-08		5.369e-08	4.791e-08	6.31811	1.81205	Control1 Only	1.47744	1.31838
Q9H3U1	UN45A_HUMAN Protein unc-45 homolog A OS=Homo sapiens GN=UNC45A PE=1 SV=1	944	101881	Q9H3U1-2;	9	2	3.1		1	3	3	1		1	6.155e-09	2.221e-08	2.496e-08	5.593e-09		7.72e-09	3.60845	4.05524	0.908692	Control1 Only	1.25426
A8MU44	A8MU44_HUMAN Protein Hook homolog 1 OS=Homo sapiens GN=HOOK1 PE=2 SV=2	686	84811	Q9UJC3;	8	8	15.2			3	4			2		2.978e-08	3.105e-08			1.548e-08	Control2 Only	Control3 Only			Sample3 Only
F5GYR8	F5GYR8_HUMAN General vesicular transport factor p115 OS=Homo sapiens GN=USO1 PE=2 SV=1	971	109415	F5H4X1;O60763;O60763-2;	14	5	6.9		1	4	5		3	1	4.457e-09	3.622e-08	4.954e-08		1.722e-08	8.166e-09	8.12654	11.1151	Control1 Only	3.86359	1.83217
A6NGW1	A6NGW1_HUMAN Protein YIF1A OS=Homo sapiens GN=YIF1A PE=2 SV=1	241	32062.6	O95070;	3	2	11.2	Oxidation (M)	0.99				0.99	0.99	4.219e-08				8.51e-08	5.994e-08	Control1 Only	Control1 Only	Control1 Only	2.01707	1.42072
E7EP00	E7EP00_HUMAN Protein transport protein Sec24C OS=Homo sapiens GN=SEC24C PE=2 SV=2	975	118573	G5EA31;P53992;	26	10	10.9	Gln->pyro-Glu (N-term Q)	2	8	9		3	4	8.06e-09	1.147e-07	1.236e-07		3.398e-08	4.57e-08	14.2308	15.335	Control1 Only	4.21588	5.66998
P27694	RFA1_HUMAN Replication protein A 70 kDa DNA-binding subunit OS=Homo sapiens GN=RPA1 PE=1 SV=2	616	68275.4		244	28	52.6	Carbamidomethyl (C),Oxidation (M)	40.97	43.98	63.96	35.98	24.99	34.98	1.658e-06	3.646e-06	3.44e-06	1.077e-06	1.078e-06	1.564e-06	2.19903	2.07479	0.649578	0.650181	0.943305
M0R2B7	M0R2B7_HUMAN DNA polymerase OS=Homo sapiens GN=POLD1 PE=2 SV=1	1133	123877	P28340;	14	9	9.5		0.99	6.93	2.97		0.99	1.98	6.777e-09	4.251e-08	1.658e-08		6.663e-09	1.192e-08	6.27269	2.44651	Control1 Only	0.983178	1.75889
C9JSQ1	C9JSQ1_HUMAN Creatine kinase U-type, mitochondrial (Fragment) OS=Homo sapiens GN=CKMT1B PE=2 SV=1	241	50514.9	E9PCP8;F8WCN3;J3KQ93;P12532;P12532-2;	4	2	11.3		1		1		1	1	7.899e-09		3.511e-08		7.271e-08	6.955e-08	Control1 Only	4.44487	Control1 Only	9.20496	8.80491
P52732	KIF11_HUMAN Kinesin-like protein KIF11 OS=Homo sapiens GN=KIF11 PE=1 SV=2	1056	119391		10	5	5.8			2	5		1	2		1.154e-08	4.218e-08		5.791e-09	9.223e-09	Control2 Only	Control3 Only		Sample2 Only	Sample3 Only
P50336	PPOX_HUMAN Protoporphyrinogen oxidase OS=Homo sapiens GN=PPOX PE=1 SV=1	477	50859.7		9	5	12.4			1	1		3.99	2.98		8.117e-08	7.293e-08		2.913e-07	1.416e-07	Control2 Only	Control3 Only		Sample2 Only	Sample3 Only
O95347	SMC2_HUMAN Structural maintenance of chromosomes protein 2 OS=Homo sapiens GN=SMC2 PE=1 SV=2	1197	125173	O95347-2;	21	11	12.8			8	6		3	4		6.046e-08	5.042e-08		1.088e-08	2.512e-08	Control2 Only	Control3 Only		Sample2 Only	Sample3 Only
Q9UBX3	DIC_HUMAN Mitochondrial dicarboxylate carrier OS=Homo sapiens GN=SLC25A10 PE=1 SV=2	287	32196.8	Q9UBX3-2;	13	5	16.7		1	1	2	1.99	2.99	3.99	1.701e-08	4.215e-08	1.229e-07	3.72e-08	1.97e-07	2.591e-07	2.47795	7.22516	2.18695	11.5814	15.2322
O60884	DNJA2_HUMAN DnaJ homolog subfamily A member 2 OS=Homo sapiens GN=DNAJA2 PE=1 SV=1	412	45824.7		10	4	10.2	Oxidation (M)		3	2	1	1	3		2.95e-07	2.638e-07	1.08e-08	2.084e-08	1.813e-07	Control2 Only	Control3 Only	Sample1 Only	Sample2 Only	Sample3 Only
B3KQC5	B3KQC5_HUMAN Endoplasmic reticulum mannosyl-oligosaccharide 1,2-alpha-mannosidase OS=Homo sapiens GN=MAN1B1 PE=2 SV=1	402	79727.9	Q9UKM7;	14	5	16.4			3.97	4.96		1.98	2.98		1.083e-07	1.208e-07		3.153e-08	4.989e-08	Control2 Only	Control3 Only		Sample2 Only	Sample3 Only
Q99832	TCPH_HUMAN T-complex protein 1 subunit eta OS=Homo sapiens GN=CCT7 PE=1 SV=2	543	54913.6	Q99832-3;	37	10	19.8	Carbamidomethyl (C),Oxidation (M)	9.9	4.95	8.91	6.93	2.97	2.97	2.456e-07	3.072e-07	5.528e-07	1.482e-07	1.401e-07	1.588e-07	1.25081	2.25081	0.60342	0.57044	0.64658
E3W978	E3W978_HUMAN Hyaluronan mediated motility receptor OS=Homo sapiens GN=HMMR PE=2 SV=2	610	74628.8	O75330;O75330-2;O75330-3;O75330-4;	17	11	19.7	Carbamidomethyl (C)	2	1	6	1	1	6	2.509e-08	6.76e-08	1.448e-07	7.898e-09	5.088e-09	7.373e-08	2.6943	5.77122	0.314787	0.20279	2.93862
E9PPM8	E9PPM8_HUMAN Putative deoxyribose-phosphate aldolase OS=Homo sapiens GN=DERA PE=2 SV=1	275	35298.5	Q9Y315;	19	6	26.2		0.99	4.95	5.94	0.99	2.97	2.97	3.17e-08	5.698e-07	7.212e-07	2.709e-08	1.828e-07	3.36e-07	17.9748	22.7508	0.854574	5.76656	10.5994
Q9Y2S7	PDIP2_HUMAN Polymerase delta-interacting protein 2 OS=Homo sapiens GN=POLDIP2 PE=1 SV=1	368	42016.2	U3KQJ1;	5	3	9		1	1			1	2	1.235e-08	3.089e-08			3.155e-08	9.455e-08	2.50121	Control1 Only	Control1 Only	2.55466	7.65587
P78371	TCPB_HUMAN T-complex protein 1 subunit beta OS=Homo sapiens GN=CCT2 PE=1 SV=4	535	57596.2		86	19	43.6	Acetylation (Protein N-term),Oxidation (M)	19.83	13.88	17.87	15.86	6.93	11.9	6.001e-07	9.437e-07	1.205e-06	4.977e-07	2.142e-07	4.944e-07	1.57257	2.008	0.829362	0.356941	0.823863
P30043	BLVRB_HUMAN Flavin reductase (NADPH) OS=Homo sapiens GN=BLVRB PE=1 SV=3	206	22159.5		39	6	38.3	Oxidation (M)	7.93	7.95	6.97	7.94	3.97	3.98	9.344e-07	1.834e-06	1.657e-06	6.821e-07	5.272e-07	7.836e-07	1.96276	1.77333	0.729987	0.564212	0.838613
J3KN16	J3KN16_HUMAN Proteasome-associated protein ECM29 homolog OS=Homo sapiens GN=KIAA0368 PE=2 SV=1	2017	204701	Q5VYK3;	9	4	2.5	Oxidation (M)	2	2	3		1	1	5.02e-09	4.335e-09	9.896e-09		1.97e-09	3.498e-09	0.863546	1.97131	Control1 Only	0.39243	0.696813
Q53H96	P5CR3_HUMAN Pyrroline-5-carboxylate reductase 3 OS=Homo sapiens GN=PYCRL PE=1 SV=2	274	28702.9		3	9	40.5	Acetylation (Protein N-term),Carbamidomethyl (C),Oxidation (M)	0.99			0.99		0.99	6.793e-08			5.581e-08		1.333e-07	Control1 Only	Control1 Only	0.821581	Control1 Only	1.96231
Q08379	GOGA2_HUMAN Golgin subfamily A member 2 OS=Homo sapiens GN=GOLGA2 PE=1 SV=3	1002	70609.1	Q08379-2;	6	4	7.3			2	2		1	1		1.272e-08	1.152e-08		2.112e-09	5.149e-09	Control2 Only	Control3 Only		Sample2 Only	Sample3 Only
H7BYY1	H7BYY1_HUMAN Tropomyosin 1 (Alpha), isoform CRA_m OS=Homo sapiens GN=TPM1 PE=2 SV=1	248	28801.7		23	38	79.8	Acetylation (Protein N-term),Gln->pyro-Glu (N-term Q),Oxidation (M)	2.94	1.96	1.96	11.76	1.96	1.96	3.768e-07	2.505e-07	2.994e-07	1.652e-06	2.503e-07	2.403e-07	0.664809	0.794586	4.38429	0.664278	0.637739
Q8WXX5	DNJC9_HUMAN DnaJ homolog subfamily C member 9 OS=Homo sapiens GN=DNAJC9 PE=1 SV=1	260	29963.1		24	12	42.7		7			16		1	3.372e-07			8.196e-07		5.585e-09	Control1 Only	Control1 Only	2.4306	Control1 Only	0.0165629
P07954	FUMH_HUMAN Fumarate hydratase, mitochondrial OS=Homo sapiens GN=FH PE=1 SV=3	510	50306.8	P07954-2;	19	7	19.9		6	2	4	4	1	2	1.263e-07	6.657e-08	1.771e-07	6.475e-08	2.393e-08	5.62e-08	0.527078	1.40222	0.512668	0.18947	0.444972
P62249	RS16_HUMAN 40S ribosomal protein S16 OS=Homo sapiens GN=RPS16 PE=1 SV=2	146	16471.1		27	10	61	Oxidation (M)	13.8			10.83	0.98	0.98	3.449e-06			1.38e-06	8.08e-08	1.042e-07	Control1 Only	Control1 Only	0.400116	0.0234271	0.0302117
Q06210	GFPT1_HUMAN Glutamine--fructose-6-phosphate aminotransferase [isomerizing] 1 OS=Homo sapiens GN=GFPT1 PE=1 SV=3	699	76908.4	Q06210-2;	82	17	31.6	Carbamidomethyl (C),Oxidation (M)	10	17	23	5	12	15	1.918e-07	4.291e-07	6.125e-07	7.263e-08	2.163e-07	2.375e-07	2.23723	3.19343	0.378676	1.12774	1.23827
Q9H9T3	ELP3_HUMAN Elongator complex protein 3 OS=Homo sapiens GN=ELP3 PE=1 SV=2	547	60753.3	Q9H9T3-2;	4	3	6.2		0.99			1.98	0.99		1.941e-08			2.797e-08	3.071e-08		Control1 Only	Control1 Only	1.44101	1.58217	Control1 Only
P07355	ANXA2_HUMAN Annexin A2 OS=Homo sapiens GN=ANXA2 PE=1 SV=2	339	40475.8	P07355-2;	34	8	28.6	Carbamidomethyl (C)	3.89	2.92	4.86	3.89	10.73	6.84	6.896e-08	1.185e-07	1.513e-07	6.549e-08	5.145e-07	2.371e-07	1.71839	2.19403	0.949681	7.46085	3.43823
Q8N1N4	K2C78_HUMAN Keratin, type II cytoskeletal 78 OS=Homo sapiens GN=KRT78 PE=2 SV=2	520	56974.6		55	24	36.9	Carbamidomethyl (C)	4.98	5.98	7.98	5.99	17.98	11.99	6.414e-08	7.961e-08	8.52e-08	5.657e-08	3.414e-07	1.683e-07	1.24119	1.32834	0.881977	5.32273	2.62395
P24844	MYL9_HUMAN Myosin regulatory light polypeptide 9 OS=Homo sapiens GN=MYL9 PE=1 SV=4	172	19850.5		24	13	66.3	Carbamidomethyl (C),Glu->pyro-Glu (N-term E),Oxidation (M)	8			15		1	9.56e-07			1.977e-06		1.812e-07	Control1 Only	Control1 Only	2.06799	Control1 Only	0.18954
F5H698	F5H698_HUMAN Leucine--tRNA ligase, cytoplasmic OS=Homo sapiens GN=LARS PE=2 SV=1	1130	134722	Q9P2J5;	86	25	26.5	Carbamidomethyl (C),Oxidation (M)	2.97	31.68	23.76	1.98	17.82	6.93	1.803e-08	3.399e-07	2.615e-07	1.113e-08	1.591e-07	8.53e-08	18.8519	14.5036	0.617304	8.82418	4.731
P33176	KINH_HUMAN Kinesin-1 heavy chain OS=Homo sapiens GN=KIF5B PE=1 SV=1	963	109905		46	18	22.9	Gln->pyro-Glu (N-term Q),Oxidation (M)		14.98	15.97	2	6	7		1.681e-07	1.553e-07	1.002e-08	5.704e-08	6.066e-08	Control2 Only	Control3 Only	Sample1 Only	Sample2 Only	Sample3 Only
K7ENL3	K7ENL3_HUMAN Signal transducer and activator of transcription OS=Homo sapiens GN=STAT3 PE=2 SV=1	722	88140.5	P40763;P40763-2;	95	20	34.1	Acetylation (Protein N-term),Oxidation (M)	13	20	23	15	11	13	2.513e-07	7.382e-07	5.887e-07	2.137e-07	2.395e-07	2.383e-07	2.93752	2.34262	0.850378	0.953044	0.948269
P11172	UMPS_HUMAN Uridine 5'-monophosphate synthase OS=Homo sapiens GN=UMPS PE=1 SV=1	480	52314.7		5	4	12.1		0.99		1.98	0.99		0.99	2.69e-08		7.057e-08	1.492e-08		2.026e-08	Control1 Only	2.62342	0.554647	Control1 Only	0.75316
K7EJC1	K7EJC1_HUMAN 26S proteasome non-ATPase regulatory subunit 8 OS=Homo sapiens GN=PSMD8 PE=2 SV=1	172	32602.9	K7EJR3;P48556;R4GMR5;	3	2	9.3		1	1		1			8.291e-08	5.75e-08		5.207e-08			0.693523	Control1 Only	0.62803	Control1 Only	Control1 Only
E9PMD7	E9PMD7_HUMAN Serine/threonine-protein phosphatase (Fragment) OS=Homo sapiens GN=PPP1CA PE=2 SV=1	253	37577.9	P62136;	5	3	14.2			1	1.99	0.99		1		9.466e-08	1.802e-07	2.716e-08		8.088e-08	Control2 Only	Control3 Only	Sample1 Only		Sample3 Only
O14980	XPO1_HUMAN Exportin-1 OS=Homo sapiens GN=XPO1 PE=1 SV=1	1071	123612		8	5	5.1		3	1	2	1		1	1.648e-08	3.362e-08	5.252e-08	6.386e-09		3.12e-08	2.04005	3.18689	0.3875	Control1 Only	1.8932
A6NED2	RCCD1_HUMAN RCC1 domain-containing protein 1 OS=Homo sapiens GN=RCCD1 PE=1 SV=1	376	39990	G3V2I3;	7	3	9.6		1	2	2	1		2	2.28e-08	1.615e-07	1.55e-07	2.471e-08		1.122e-07	7.08333	6.79825	1.08377	Control1 Only	4.92105
Q14258	TRI25_HUMAN E3 ubiquitin/ISG15 ligase TRIM25 OS=Homo sapiens GN=TRIM25 PE=1 SV=2	630	71107.8		32	9	14.8	Oxidation (M)	10	6	6	6	1	4	1.944e-07	1.511e-07	1.187e-07	9.037e-08	2.895e-08	7.379e-08	0.777263	0.610597	0.464866	0.14892	0.379578
P30460	1B08_HUMAN HLA class I histocompatibility antigen, B-8 alpha chain OS=Homo sapiens GN=HLA-B PE=1 SV=1	362	40411	P30462;P30475;	15	5	18		2.91	1.94	3.91	1.94	0.98	2.93	9.299e-08	2.356e-07	4.536e-07	4.831e-08	1.147e-07	1.744e-07	2.53361	4.87794	0.519518	1.23347	1.87547
Q9NRF8	PYRG2_HUMAN CTP synthase 2 OS=Homo sapiens GN=CTPS2 PE=1 SV=1	586	65797.9		7	2	3.6		1	2	2	1		1	1.539e-08	6.274e-08	1.939e-08	1.04e-08		2.586e-08	4.07667	1.25991	0.675763	Control1 Only	1.68031
P01621	KV303_HUMAN Ig kappa chain V-III region NG9 (Fragment) OS=Homo sapiens PE=1 SV=1	100	10740.3		9	2	25		1	3	1	1	2	1	9.927e-08	1.048e-06	2.875e-07	4.633e-08	4.321e-07	1.706e-07	10.5571	2.89614	0.466707	4.35278	1.71855
Q99460	PSMD1_HUMAN 26S proteasome non-ATPase regulatory subunit 1 OS=Homo sapiens GN=PSMD1 PE=1 SV=2	953	102463	Q99460-2;	63	20	32.6	Carbamidomethyl (C),Gln->pyro-Glu (N-term Q),Oxidation (M)	3	20.98	16.99	4	10.99	8.98	4.506e-08	3.168e-07	2.686e-07	4.58e-08	1.38e-07	8.783e-08	7.03063	5.96094	1.01642	3.06258	1.94918
B7Z8V7	B7Z8V7_HUMAN NAD kinase 2, mitochondrial OS=Homo sapiens GN=NADK2 PE=2 SV=1	301	31768.2	Q4G0N4;Q4G0N4-2;Q4G0N4-3;	6	2	10		1	2	1		1	1	1.627e-08	1.449e-07	8.406e-08		4.224e-08	5.689e-08	8.90596	5.16656	Control1 Only	2.59619	3.49662
Q00653	NFKB2_HUMAN Nuclear factor NF-kappa-B p100 subunit OS=Homo sapiens GN=NFKB2 PE=1 SV=4	900	96870	Q00653-4;	3	2	2.7			1	1		1			1.111e-08	7.937e-09		5.87e-09		Control2 Only	Control3 Only		Sample2 Only
Q5SSJ5	HP1B3_HUMAN Heterochromatin protein 1-binding protein 3 OS=Homo sapiens GN=HP1BP3 PE=1 SV=1	553	61331.4		19	11	20.3	Acetylation (Protein N-term)	11.8	0.99		5.9			3.204e-07	5.648e-09		1.345e-07			0.017628	Control1 Only	0.419788	Control1 Only	Control1 Only
C9J9W2	C9J9W2_HUMAN LIM and SH3 domain protein 1 (Fragment) OS=Homo sapiens GN=LASP1 PE=2 SV=1	166	36080.8	Q14847;Q14847-2;	19	7	38.6	Oxidation (M)	3	1	1.99	5	4.99	2.99	1.79e-07	1.265e-07	1.691e-07	2.09e-07	5.555e-07	2.957e-07	0.706704	0.944693	1.1676	3.10335	1.65196
P12270	TPR_HUMAN Nucleoprotein TPR OS=Homo sapiens GN=TPR PE=1 SV=3	2363	267834		3	2	1		2		1				1.827e-09		9.793e-10				Control1 Only	0.536015	Control1 Only	Control1 Only	Control1 Only
P06702	S10A9_HUMAN Protein S100-A9 OS=Homo sapiens GN=S100A9 PE=1 SV=1	114	13251.5		33	4	44.7		4	1	7	7	8	8	1.17e-07	2.887e-08	7.266e-07	4.12e-07	5.986e-07	8.587e-07	0.246752	6.21026	3.52137	5.11624	7.33932
P16401	H15_HUMAN Histone H1.5 OS=Homo sapiens GN=HIST1H1B PE=1 SV=3	226	22620.5		105	21	48.7	Acetylation (Protein N-term)	45			55		5	1.044e-05			1.957e-05		1.701e-07	Control1 Only	Control1 Only	1.87452	Control1 Only	0.0162931
Q8NCW5	NNRE_HUMAN NAD(P)H-hydrate epimerase OS=Homo sapiens GN=APOA1BP PE=1 SV=2	288	20471.6	Q8NCW5-2;	4	2	14.6		1	1	1			1	9.086e-09	3.726e-08	4.029e-08			3.293e-08	4.10081	4.43429	Control1 Only	Control1 Only	3.62426
O60678	ANM3_HUMAN Protein arginine N-methyltransferase 3 OS=Homo sapiens GN=PRMT3 PE=1 SV=3	531	52966.8	O60678-2;	6	2	5.3		1	1	2	1	1		2.236e-08	7.132e-08	7.789e-08	1.468e-08	5.488e-08		3.18962	3.48345	0.65653	2.45438	Control1 Only
Q04837	SSBP_HUMAN Single-stranded DNA-binding protein, mitochondrial OS=Homo sapiens GN=SSBP1 PE=1 SV=1	148	17285.1		22	7	50	Oxidation (M)	10	2	1	6	1	2	1.815e-06	2.602e-07	2.527e-07	5.955e-07	2.252e-07	2.95e-07	0.143361	0.139229	0.328099	0.124077	0.162534
K7EMW4	K7EMW4_HUMAN Nicalin OS=Homo sapiens GN=NCLN PE=2 SV=1	489	62968.6	Q969V3;Q969V3-2;	7	5	12.5			1	2.99		2	1		7.238e-08	1.544e-07		7.662e-08	1.775e-08	Control2 Only	Control3 Only		Sample2 Only	Sample3 Only
Q9H223	EHD4_HUMAN EH domain-containing protein 4 OS=Homo sapiens GN=EHD4 PE=1 SV=1	541	61298.6		3	2	4.6				1		1	1			2.783e-08		3.58e-08	3.704e-08		Control3 Only		Sample2 Only	Sample3 Only
P21964	COMT_HUMAN Catechol O-methyltransferase OS=Homo sapiens GN=COMT PE=1 SV=2	271	24487.4	P21964-2;	32	8	46.6	Carbamidomethyl (C)	12.92	2.97	2.97	9.94	0.99	2.97	1.67e-06	6.482e-07	6.319e-07	9.206e-07	8.713e-08	4.484e-07	0.388144	0.378383	0.551257	0.0521737	0.268503
CONT_TRFL_HUMAN	Possible Contaminant TRFL_HUMAN	710	73312.4	E7EQB2;E7ER44;P02788;P02788-2;	23	9	16.2	Carbamidomethyl (C)	1	2	4	11	3	4	5.8e-09	1.708e-08	4.644e-08	1.121e-07	1.855e-08	3.455e-08	2.94483	8.0069	19.3276	3.19828	5.9569
P18669	PGAM1_HUMAN Phosphoglycerate mutase 1 OS=Homo sapiens GN=PGAM1 PE=1 SV=2	254	28857.9		36	8	28	Oxidation (M)	8.96	3.97	6.97	5.97	3.97	6.98	5.512e-07	4.061e-07	1.07e-06	3.233e-07	2.877e-07	3.723e-07	0.736756	1.94122	0.586538	0.521952	0.675435
Q9UJ70	NAGK_HUMAN N-acetyl-D-glucosamine kinase OS=Homo sapiens GN=NAGK PE=1 SV=4	344	37442		22	6	23	Acetylation (Protein N-term)	2.97	4.94	4.94	3.95	1	3.95	1.334e-07	5.343e-07	5.628e-07	1.222e-07	6.827e-08	3.909e-07	4.00525	4.21889	0.916042	0.511769	2.93028
O14950	ML12B_HUMAN Myosin regulatory light chain 12B OS=Homo sapiens GN=MYL12B PE=1 SV=2	172	19802.5		92	17	83.7	Carbamidomethyl (C),Glu->pyro-Glu (N-term E),Oxidation (M)	24	5	4	45	5	9	1.137e-05	2.097e-06	2.034e-06	2.376e-05	1.398e-06	3.05e-06	0.184433	0.178892	2.08971	0.122955	0.26825
P35749	MYH11_HUMAN Myosin-11 OS=Homo sapiens GN=MYH11 PE=1 SV=3	1972	224015	P35749-2;P35749-3;P35749-4;	52	38	16.9	Carbamidomethyl (C),Carbamidomethyl (C) + Ammonia-loss (N-term C),Gln->pyro-Glu (N-term Q),Oxidation (M)	8	4	4	18	3	8	2.096e-08	1.522e-08	8.133e-09	6.503e-08	1.19e-08	3.083e-08	0.726145	0.388025	3.10258	0.567748	1.4709
G5E9Q2	G5E9Q2_HUMAN Cold shock domain containing E1, RNA-binding, isoform CRA_d OS=Homo sapiens GN=CSDE1 PE=2 SV=1	844	90781.9	O75534;O75534-2;O75534-3;	154	29	37.5	Carbamidomethyl (C),Gln->pyro-Glu (N-term Q),Oxidation (M)	10.98	42.93	39.94	7.98	24.96	28.95	1.59e-07	1.028e-06	1.139e-06	8.529e-08	4.162e-07	6.427e-07	6.46541	7.16352	0.536415	2.61761	4.04214
J3KP15	J3KP15_HUMAN Serine/arginine-rich-splicing factor 2 (Fragment) OS=Homo sapiens GN=SRSF2 PE=2 SV=1	134	25515.2	Q01130;	15	5	34.3	Acetylation (Protein N-term),Oxidation (M)	2.97			1.98	3.99	5.98	4.994e-07			3.389e-07	2.897e-07	4.26e-07	Control1 Only	Control1 Only	0.678614	0.580096	0.853024
F8VZ44	F8VZ44_HUMAN Aladin OS=Homo sapiens GN=AAAS PE=2 SV=1	422	59698.4	H3BU82;Q9NRG9;	6	3	9.5				1.99		1.99	1.99			1.158e-07		1.54e-07	1.121e-07		Control3 Only		Sample2 Only	Sample3 Only
Q9UHD2	TBK1_HUMAN Serine/threonine-protein kinase TBK1 OS=Homo sapiens GN=TBK1 PE=1 SV=1	729	83804.9		24	9	15.9	Oxidation (M)	1	5	10	1	3	4	1.161e-08	5.734e-08	1.227e-07	1.063e-08	2.957e-08	4.238e-08	4.93885	10.5685	0.91559	2.54694	3.6503
P61962	DCAF7_HUMAN DDB1- and CUL4-associated factor 7 OS=Homo sapiens GN=DCAF7 PE=1 SV=1	342	38991.1		15	6	22.8	Oxidation (M)	3.99	1	1	3	3	3	1.13e-07	5.47e-08	6.654e-08	7.145e-08	2.02e-07	2.375e-07	0.484071	0.58885	0.632301	1.78761	2.10177
Q7Z406-6	MYH14_HUMAN Isoform 6 of Myosin-14 OS=Homo sapiens GN=MYH14	2003	229120		695	125	59.9	Acetylation (Protein N-term),Carbamidomethyl (C),Carbamidomethyl (C) + Ammonia-loss (N-term C),Gln->pyro-Glu (N-term Q),Glu->pyro-Glu (N-term E),Oxidation (M)	125.96	95.74	65.47	195.33	65.47	132.87	5.837e-07	5.807e-07	2.829e-07	1.555e-06	3.807e-07	9.407e-07	0.99486	0.484667	2.66404	0.652219	1.61162
Q6DD88	ATLA3_HUMAN Atlastin-3 OS=Homo sapiens GN=ATL3 PE=1 SV=1	541	60665.5		56	13	34.9	Oxidation (M)	9.9	6.94	12.87	5.93	6.94	8.92	1.968e-07	5.112e-07	9.206e-07	1.158e-07	3.099e-07	3.694e-07	2.59756	4.67785	0.588415	1.5747	1.87703
Q15181	IPYR_HUMAN Inorganic pyrophosphatase OS=Homo sapiens GN=PPA1 PE=1 SV=2	289	32711.2		7	2	10.7		1	2	1	2	1		3.08e-08	2.074e-07	1.071e-07	7.735e-08	7.727e-08		6.73377	3.47727	2.51136	2.50877	Control1 Only
E9PJF0	E9PJF0_HUMAN Mitogen-activated protein kinase 3 OS=Homo sapiens GN=MAPK3 PE=2 SV=1	316	40152.6	E9PQW4;P27361;P27361-2;P27361-3;	5	4	13	Acetylation (Protein N-term),Carbamidomethyl (C),Oxidation (M)		1	2		1	1		1.842e-07	2.948e-07		8.941e-08	1.295e-07	Control2 Only	Control3 Only		Sample2 Only	Sample3 Only
P34896	GLYC_HUMAN Serine hydroxymethyltransferase, cytosolic OS=Homo sapiens GN=SHMT1 PE=1 SV=1	483	49122.9	P34896-2;	55	11	29.1	Carbamidomethyl (C),Oxidation (M)	2.88	11.73	16.66	1.92	10.75	9.76	6.935e-08	1.427e-06	1.421e-06	4.092e-08	6.774e-07	7.562e-07	20.5768	20.4903	0.59005	9.76784	10.9041
P35579	MYH9_HUMAN Myosin-9 OS=Homo sapiens GN=MYH9 PE=1 SV=4	1960	226968		5708	266	82	Acetylation (Protein N-term),Carbamidomethyl (C),Carbamidomethyl (C) + Ammonia-loss (N-term C),Gln->pyro-Glu (N-term Q),Glu->pyro-Glu (N-term E),Oxidation (M)	968.1	964.1	670.38	1363.47	674.35	1060.97	2.774e-05	2.998e-05	1.405e-05	6.314e-05	2.035e-05	3.74e-05	1.08075	0.506489	2.27614	0.733598	1.34823
P62701	RS4X_HUMAN 40S ribosomal protein S4, X isoform OS=Homo sapiens GN=RPS4X PE=1 SV=2	263	29651.1		56	18	58.6	Carbamidomethyl (C),Oxidation (M)	19.94		0.99	23.93	4.98	5.99	1.27e-06		1.489e-07	1.403e-06	6.05e-07	7.873e-07	Control1 Only	0.117244	1.10472	0.476378	0.619921
P10412	H14_HUMAN Histone H1.4 OS=Homo sapiens GN=HIST1H1E PE=1 SV=2	219	21906		32	22	55.3	Acetylation (Protein N-term)	12			18		3	2.87e-06			5.264e-06		2.053e-07	Control1 Only	Control1 Only	1.83415	Control1 Only	0.0715331
Q9P2M7	CING_HUMAN Cingulin OS=Homo sapiens GN=CGN PE=1 SV=2	1197	136646		7	6	5			1.99	3.99	1	1			8.707e-09	1.402e-08	2.552e-09	6.026e-09		Control2 Only	Control3 Only	Sample1 Only	Sample2 Only
C9J1Z8	C9J1Z8_HUMAN ADP-ribosylation factor 5 (Fragment) OS=Homo sapiens GN=ARF5 PE=2 SV=1	150	20552.6	P84085;	4	4	41.3	Oxidation (M)	1			1	1	1	7.586e-08			4.197e-08	3.319e-08	9.691e-08	Control1 Only	Control1 Only	0.553256	0.437516	1.27748
P22735	TGM1_HUMAN Protein-glutamine gamma-glutamyltransferase K OS=Homo sapiens GN=TGM1 PE=1 SV=4	817	89964.5		4	3	5.1				1		1.99	1			4.709e-09		9.266e-09	4.514e-09		Control3 Only		Sample2 Only	Sample3 Only
P04259	K2C6B_HUMAN Keratin, type II cytoskeletal 6B OS=Homo sapiens GN=KRT6B PE=1 SV=5	564	60192.4		31	57	70.9	Acetylation (Protein N-term),Carbamidomethyl (C),Gln->pyro-Glu (N-term Q),Glu->pyro-Glu (N-term E),Oxidation (M)	1	4.5	6	3	7	8.5	5.18e-08	1.1e-07	3.398e-07	5.036e-08	4.785e-07	4.931e-07	2.12355	6.55985	0.972201	9.23745	9.51931
P12273	PIP_HUMAN Prolactin-inducible protein OS=Homo sapiens GN=PIP PE=1 SV=1	146	16597.8		9	2	19.2		5	1		2	1		4.137e-07	6.825e-08		1.759e-07	5.042e-08		0.164975	Control1 Only	0.425187	0.121876	Control1 Only
O43837	IDH3B_HUMAN Isocitrate dehydrogenase [NAD] subunit beta, mitochondrial OS=Homo sapiens GN=IDH3B PE=1 SV=2	385	42264.7		19	5	13.5		1.99	3.98	2.99	2.98	3.99	3	8.738e-08	5.772e-07	5.297e-07	1.026e-07	2.71e-07	2.157e-07	6.60563	6.06203	1.17418	3.1014	2.46853
K7EQ48	K7EQ48_HUMAN Glucose-6-phosphate isomerase OS=Homo sapiens GN=GPI PE=2 SV=2	474	64446	P06744;P06744-2;	7	3	6.8		1	2	2		1	1	3.135e-08	1.397e-07	9.562e-08		6.338e-08	5.815e-08	4.45614	3.05008	Control1 Only	2.02169	1.85486
J3KQD0	J3KQD0_HUMAN Prostamide/prostaglandin F synthase OS=Homo sapiens GN=FAM213B PE=2 SV=1	228	23394.2	Q8TBF2;Q8TBF2-3;	29	5	38.9		10.94	3.97	1.99	7.95	1.99	1.99	1.085e-06	8.438e-07	4.52e-07	5.807e-07	3.162e-07	3.253e-07	0.777696	0.41659	0.535207	0.291429	0.299816
P30086	PEBP1_HUMAN Phosphatidylethanolamine-binding protein 1 OS=Homo sapiens GN=PEBP1 PE=1 SV=3	187	21097.7		8	4	30.5		2			4	2		1.047e-07			1.507e-07	8.005e-08		Control1 Only	Control1 Only	1.43935	0.764565	Control1 Only
P35249	RFC4_HUMAN Replication factor C subunit 4 OS=Homo sapiens GN=RFC4 PE=1 SV=2	363	39764.9		15	8	24.8		5.93	1	2	5.93			1.414e-07	4.2e-08	7.491e-08	1.178e-07			0.29703	0.529774	0.833098	Control1 Only	Control1 Only
Q9Y305	ACOT9_HUMAN Acyl-coenzyme A thioesterase 9, mitochondrial OS=Homo sapiens GN=ACOT9 PE=1 SV=2	439	50944	Q9Y305-2;Q9Y305-4;	113	16	44.3	Carbamidomethyl (C),Oxidation (M)	13.92	26.83	21.85	12.93	15.89	20.86	4.44e-07	3.315e-06	2.933e-06	3.062e-07	1.478e-06	1.831e-06	7.46622	6.60586	0.68964	3.32883	4.12387
P29508	SPB3_HUMAN Serpin B3 OS=Homo sapiens GN=SERPINB3 PE=1 SV=2	390	38615.5	P29508-2;	8	6	19.2				3		1	3.99			2.667e-07		4.066e-08	8.277e-08		Control3 Only		Sample2 Only	Sample3 Only
B4E022	B4E022_HUMAN Transketolase OS=Homo sapiens GN=TKT PE=2 SV=1	576	68950.2	P29401;P29401-2;	60	13	25.3		9.98	8.99	13.98	5.99	10.98	9.99	1.814e-07	5.239e-07	3.873e-07	8.325e-08	2.444e-07	2.184e-07	2.88809	2.13506	0.458931	1.3473	1.20397
Q6P1M0	S27A4_HUMAN Long-chain fatty acid transport protein 4 OS=Homo sapiens GN=SLC27A4 PE=1 SV=1	643	72198.2		9	3	4.5		1	2	3		1	2	1.102e-08	4.465e-08	6.671e-08		2.531e-08	2.869e-08	4.05172	6.05354	Control1 Only	2.29673	2.60345
P14923	PLAK_HUMAN Junction plakoglobin OS=Homo sapiens GN=JUP PE=1 SV=3	745	81908.9		210	29	45.2	Carbamidomethyl (C),Oxidation (M)	38.39	12.96	26.92	45.4	49.34	35.91	6.816e-07	1.483e-07	2.513e-07	7.33e-07	9.177e-07	4.356e-07	0.217576	0.368691	1.07541	1.34639	0.639085
P63208	SKP1_HUMAN S-phase kinase-associated protein 1 OS=Homo sapiens GN=SKP1 PE=1 SV=2	163	18682.3		70	13	61.3	Carbamidomethyl (C),Oxidation (M)	18.85	10.89	7.92	19.84	6.93	4.96	2.766e-06	1.779e-06	1.391e-06	1.777e-06	7.369e-07	7.04e-07	0.643167	0.502892	0.642444	0.266414	0.254519
P24752	THIL_HUMAN Acetyl-CoA acetyltransferase, mitochondrial OS=Homo sapiens GN=ACAT1 PE=1 SV=1	427	45296.7		75	19	46.6	Carbamidomethyl (C),Oxidation (M)	4.99	22.95	17.98	2	13.98	13.97	1.242e-07	3.176e-06	2.511e-06	6.594e-08	1.537e-06	1.545e-06	25.5717	20.2174	0.530918	12.3752	12.4396
B2R5P6	B2R5P6_HUMAN Thioredoxin reductase 1, cytoplasmic OS=Homo sapiens GN=TXNRD1 PE=2 SV=1	497	67253.1	B7Z2S5;B7Z904;E2QRB9;E7ESI6;E7EW10;E9PIR7;E9PNQ6;Q16881;Q16881-2;Q16881-3;Q16881-4;Q16881-5;Q16881-6;	12	5	13.1		1.98	3.96	1.98	2.97	1.98		4.671e-08	2.001e-07	8.615e-08	6.337e-08	9.375e-08		4.28388	1.84436	1.35667	2.00706	Control1 Only
P51153	RAB13_HUMAN Ras-related protein Rab-13 OS=Homo sapiens GN=RAB13 PE=1 SV=1	203	22813.8		5	3	18.2			2	1	1	1			9.454e-08	4.913e-08	1.871e-08	4.607e-08		Control2 Only	Control3 Only	Sample1 Only	Sample2 Only
DECOY2_76328	DECOY Group 2 Number 76328	424	46684.3		70	2	3.3	Carbamidomethyl (C),Oxidation (M)	12	13	13	14	13	13	1.321e-06	3.389e-06	5.292e-06	6.222e-07	2.743e-06	2.221e-06	2.56548	4.00606	0.471007	2.07646	1.6813
P49257	LMAN1_HUMAN Protein ERGIC-53 OS=Homo sapiens GN=LMAN1 PE=1 SV=2	510	57657.1		27	6	16.7	Oxidation (M)	5	6	5	5	2	4	1.763e-07	5.579e-07	4.799e-07	1.756e-07	1.589e-07	2.854e-07	3.16449	2.72206	0.996029	0.901305	1.61883
P46777	RL5_HUMAN 60S ribosomal protein L5 OS=Homo sapiens GN=RPL5 PE=1 SV=3	297	34412.7		39	11	36.4	Carbamidomethyl (C),Oxidation (M)	12		1	22		4	5.711e-07		3.871e-08	9.164e-07		2.714e-07	Control1 Only	0.0677815	1.60462	Control1 Only	0.475223
P33991	MCM4_HUMAN DNA replication licensing factor MCM4 OS=Homo sapiens GN=MCM4 PE=1 SV=5	863	96749.8		79	20	32.1	Carbamidomethyl (C),Gln->pyro-Glu (N-term Q),Oxidation (M)	4	20.98	20.97	2	13.98	16.97	3.922e-08	3.989e-07	3.597e-07	1.697e-08	1.811e-07	2.03e-07	10.1708	9.17134	0.432687	4.61754	5.17593
F5H039	F5H039_HUMAN Molybdopterin molybdenumtransferase OS=Homo sapiens GN=GPHN PE=2 SV=1	782	83610.9	F8W7D6;G3V582;Q9NQX3;Q9NQX3-2;	6	2	8.2			2	2		1	1		2.983e-08	2.679e-08		1.518e-08	9.244e-09	Control2 Only	Control3 Only		Sample2 Only	Sample3 Only
P04843	RPN1_HUMAN Dolichyl-diphosphooligosaccharide--protein glycosyltransferase subunit 1 OS=Homo sapiens GN=RPN1 PE=1 SV=1	607	68706.9		27	11	20.8		6	4	7	2	3	6	1.235e-07	1.523e-07	1.631e-07	4.155e-08	3.971e-08	1.331e-07	1.2332	1.32065	0.336437	0.321538	1.07773
F5GXC8	F5GXC8_HUMAN Succinyl-CoA ligase [ADP-forming] subunit beta, mitochondrial OS=Homo sapiens GN=SUCLA2 PE=2 SV=1	405	48135.1	Q9P2R7;Q9P2R7-2;	3	2	4.9			1			1	1		7.352e-08			7.039e-08	8.844e-08	Control2 Only			Sample2 Only	Sample3 Only
Q14558	KPRA_HUMAN Phosphoribosyl pyrophosphate synthase-associated protein 1 OS=Homo sapiens GN=PRPSAP1 PE=1 SV=2	356	42548.5	Q14558-2;	6	5	18.3		0.99		0.99			3.51	2.56e-08		9.178e-08			2.445e-07	Control1 Only	3.58516	Control1 Only	Control1 Only	9.55078
Q96CN7	ISOC1_HUMAN Isochorismatase domain-containing protein 1 OS=Homo sapiens GN=ISOC1 PE=1 SV=3	298	32288.2		18	5	25.8		3	1	2	4	4	4	9.457e-08	1.082e-07	1.715e-07	1.277e-07	2.901e-07	3.19e-07	1.14413	1.81347	1.35032	3.06757	3.37316
Q8WUK0	PTPM1_HUMAN Phosphatidylglycerophosphatase and protein-tyrosine phosphatase 1 OS=Homo sapiens GN=PTPMT1 PE=1 SV=1	201	22883.2		12	5	28.9		4.99	0.99	0.99	2.99	0.99	0.99	4.388e-07	1.603e-07	2.753e-07	2.565e-07	4.839e-08	1.403e-07	0.365314	0.627393	0.584549	0.110278	0.319736
Q9Y3I0	RTCB_HUMAN tRNA-splicing ligase RtcB homolog OS=Homo sapiens GN=RTCB PE=1 SV=1	505	55318.9		45	12	29.3	Oxidation (M)	8	9	10	7	6	5	1.921e-07	6.3e-07	7.071e-07	1.287e-07	3.009e-07	3.695e-07	3.27954	3.6809	0.669964	1.56637	1.92348
P62333	PRS10_HUMAN 26S protease regulatory subunit 10B OS=Homo sapiens GN=PSMC6 PE=1 SV=1	389	44253.2		38	8	23.4		7.94	7.94	8.93	5.95	4.97	3.97	1.962e-07	7.722e-07	7.269e-07	1.207e-07	4.569e-07	3.175e-07	3.93578	3.70489	0.615189	2.32875	1.61825
P22234	PUR6_HUMAN Multifunctional protein ADE2 OS=Homo sapiens GN=PAICS PE=1 SV=3	425	47175.2		56	13	31.1	Acetylation (Protein N-term),Carbamidomethyl (C)	9.9	8.91	13.87	9.9	4.95	7.92	2.498e-07	9.061e-07	1.191e-06	2.198e-07	3.42e-07	6.965e-07	3.6273	4.76781	0.879904	1.3691	2.78823
Q96CS3	FAF2_HUMAN FAS-associated factor 2 OS=Homo sapiens GN=FAF2 PE=1 SV=2	445	52716.6		9	4	10.8	Acetylation (Protein N-term)	2	2		1	1	4	4.32e-08	4.677e-08		8.687e-09	4.348e-08	1.359e-07	1.08264	Control1 Only	0.201088	1.00648	3.14583
P11216	PYGB_HUMAN Glycogen phosphorylase, brain form OS=Homo sapiens GN=PYGB PE=1 SV=5	843	96886.7		28	9	10.8			7.99	7.99		6	5.99		9.769e-08	1.088e-07		4.587e-08	5.328e-08	Control2 Only	Control3 Only		Sample2 Only	Sample3 Only
C9JQ42	C9JQ42_HUMAN Glycogenin-1 (Fragment) OS=Homo sapiens GN=GYG1 PE=2 SV=1	266	31518.8	G5E9W8;P46976;P46976-2;P46976-3;	12	3	18.7	Acetylation (Protein N-term)	1	1.99	1	2.99	2	3	1.153e-08	4.975e-08	1.263e-08	4.83e-08	4.573e-08	6.044e-08	4.31483	1.0954	4.18907	3.96618	5.24198
E5KLJ5	E5KLJ5_HUMAN Dynamin-like 120 kDa protein, mitochondrial OS=Homo sapiens GN=OPA1 PE=2 SV=1	1015	116100	E5KLJ9;E5KLK1;O60313-2;	107	28	32.2	Carbamidomethyl (C),Oxidation (M)	4	30.97	31.97	1	21	19.99	2.567e-08	3.759e-07	4.008e-07	1.165e-09	1.971e-07	2.159e-07	14.6436	15.6136	0.0453837	7.67822	8.4106
B4DNJ6	B4DNJ6_HUMAN Serine-threonine kinase receptor-associated protein OS=Homo sapiens GN=STRAP PE=2 SV=1	363	38504	Q9Y3F4;	41	10	34.6		3.98	7.98	9.96	4.97	4.98	8.96	1.195e-07	9.201e-07	1.189e-06	1.139e-07	4.217e-07	6.707e-07	7.69958	9.94979	0.953138	3.52887	5.61255
Q8NF37	PCAT1_HUMAN Lysophosphatidylcholine acyltransferase 1 OS=Homo sapiens GN=LPCAT1 PE=1 SV=2	534	59257.5		11	3	7.1		1	2	1	2	3	2	6.16e-09	8.312e-08	1.319e-08	1.853e-08	1.318e-07	5.931e-08	13.4935	2.14123	3.00812	21.3961	9.62825
Q15427	SF3B4_HUMAN Splicing factor 3B subunit 4 OS=Homo sapiens GN=SF3B4 PE=1 SV=1	424	44483.2		12	3	10.8	Acetylation (Protein N-term)	1	3	3	1	1	3	2.715e-08	2.948e-07	3.316e-07	2.515e-08	6.356e-08	2.47e-07	10.8582	12.2136	0.926335	2.34107	9.09761
O75382	TRIM3_HUMAN Tripartite motif-containing protein 3 OS=Homo sapiens GN=TRIM3 PE=1 SV=2	744	67863.9	O75382-2;O75382-4;	14	6	13.6		3.99	1.99	2.99	3.99		1	5.394e-08	5.01e-08	4.519e-08	5.508e-08		1.592e-08	0.92881	0.837783	1.02113	Control1 Only	0.295143
K7ELX4	K7ELX4_HUMAN Ferrochelatase, mitochondrial (Fragment) OS=Homo sapiens GN=FECH PE=2 SV=1	326	48720	P22830;P22830-2;	22	5	19.9	Oxidation (M)	3	3.99	4.99	3	1.99	5	7.488e-08	4.316e-07	6.971e-07	4.616e-08	1.031e-07	4.887e-07	5.76389	9.30956	0.616453	1.37687	6.52644
P04406	G3P_HUMAN Glyceraldehyde-3-phosphate dehydrogenase OS=Homo sapiens GN=GAPDH PE=1 SV=3	335	31600	P04406-2;	217	17	80.5	Carbamidomethyl (C),Oxidation (M)	39.99	35.96	35.97	41.99	33.99	28.98	1.82e-06	5.041e-06	5.755e-06	1.57e-06	2.966e-06	2.833e-06	2.76978	3.16209	0.862637	1.62967	1.55659
Q147X3	NAA30_HUMAN N-alpha-acetyltransferase 30 OS=Homo sapiens GN=NAA30 PE=1 SV=1	362	35647	Q147X3-2;	7	3	12.3			1.99	2.99		0.99	0.99		1.055e-07	2.315e-07		7.542e-08	9.357e-08	Control2 Only	Control3 Only		Sample2 Only	Sample3 Only
O00159-3	MYO1C_HUMAN Isoform 3 of Unconventional myosin-Ic OS=Homo sapiens GN=MYO1C	1044	119860		94	25	28.7	Oxidation (M)	3.94	16.77	14.82	34.56	6.89	15.79	4.258e-08	1.352e-07	1.449e-07	3.994e-07	5.882e-08	1.615e-07	3.1752	3.40301	9.37999	1.3814	3.79286
Q9Y6D5	BIG2_HUMAN Brefeldin A-inhibited guanine nucleotide-exchange protein 2 OS=Homo sapiens GN=ARFGEF2 PE=1 SV=3	1785	202431		4	4	2.3		2			1		1	1.855e-09			1.313e-09		4.504e-09	Control1 Only	Control1 Only	0.707817	Control1 Only	2.42803
P28482	MK01_HUMAN Mitogen-activated protein kinase 1 OS=Homo sapiens GN=MAPK1 PE=1 SV=3	360	41453.3		68	11	32.2	Acetylation (Protein N-term),Carbamidomethyl (C),Oxidation (M)	9.08	11.61	12.61	8.62	9.08	10.08	5.498e-07	2.458e-06	2.491e-06	4.457e-07	1.131e-06	1.538e-06	4.47072	4.53074	0.810658	2.05711	2.79738
B3KXW5	B3KXW5_HUMAN AP-1 complex subunit gamma-1 OS=Homo sapiens GN=AP1G1 PE=2 SV=1	845	91898.4	J3KQU9;O43747;O43747-2;	36	12	17.5	Oxidation (M)	2	9.99	10.98	1	5	7	8.872e-09	1.24e-07	1.798e-07	1.545e-09	6.768e-08	8.745e-08	13.9766	20.266	0.174143	7.62849	9.85685
P30153	2AAA_HUMAN Serine/threonine-protein phosphatase 2A 65 kDa regulatory subunit A alpha isoform OS=Homo sapiens GN=PPP2R1A PE=1 SV=4	589	65429		105	18	38.9	Oxidation (M)	18.79	16.81	21.75	14.83	11.86	19.78	5.531e-07	1.197e-06	1.318e-06	3.626e-07	5.124e-07	8.347e-07	2.16417	2.38293	0.655578	0.926415	1.50913
Q86VP6	CAND1_HUMAN Cullin-associated NEDD8-dissociated protein 1 OS=Homo sapiens GN=CAND1 PE=1 SV=2	1230	136649		84	19	19	Acetylation (Protein N-term),Oxidation (M)	14.97	16.98	17.99	13.98	10	11	1.891e-07	2.059e-07	2.348e-07	1.331e-07	8.307e-08	1.137e-07	1.08884	1.24167	0.70386	0.439291	0.601269
P49006	MRP_HUMAN MARCKS-related protein OS=Homo sapiens GN=MARCKSL1 PE=1 SV=2	195	19571.3		13	2	14.4		3	2	3	2	2	2	6.007e-08	2.379e-07	2.349e-07	4.223e-08	1.283e-07	1.065e-07	3.96038	3.91044	0.703013	2.13584	1.77293
P0CG05	LAC2_HUMAN Ig lambda-2 chain C regions OS=Homo sapiens GN=IGLC2 PE=1 SV=1	106	11248.5	P0CG06;	5	2	23.6	Carbamidomethyl (C)			1	1	2	1			1.723e-07	3.873e-08	2.084e-07	8.996e-08		Control3 Only	Sample1 Only	Sample2 Only	Sample3 Only
P21333	FLNA_HUMAN Filamin-A OS=Homo sapiens GN=FLNA PE=1 SV=4	2647	277152	P21333-2;Q5HY54;	8	6	2.5		1.99	2.97	0.99		0.99	0.99	2.173e-09	5.844e-09	3.433e-09		1.938e-09	2.604e-09	2.68937	1.57984	Control1 Only	0.891855	1.19834
Q13618	CUL3_HUMAN Cullin-3 OS=Homo sapiens GN=CUL3 PE=1 SV=2	768	86395.2	Q13618-2;	37	16	25.1	Carbamidomethyl (C)	2	6.97	13.96	1	7.98	6.97	1.928e-08	6.919e-08	2.173e-07	5.687e-09	6.886e-08	8.083e-08	3.58869	11.2707	0.294969	3.57158	4.19243
C9J050	C9J050_HUMAN Choline-phosphate cytidylyltransferase A (Fragment) OS=Homo sapiens GN=PCYT1A PE=2 SV=1	293	41812.9	C9JEJ2;H7C1T3;P49585;	17	5	29.9	Oxidation (M)	2.97	2.97	4.96	2.97	0.99	1.99	1.117e-07	7.309e-07	6.448e-07	7.26e-08	3.5e-07	3.914e-07	6.54342	5.77261	0.649955	3.13339	3.50403
P53396	ACLY_HUMAN ATP-citrate synthase OS=Homo sapiens GN=ACLY PE=1 SV=3	1101	120020	P53396-2;	173	36	34.7	Carbamidomethyl (C),Gln->pyro-Glu (N-term Q),Oxidation (M)	15.96	44.94	43.95	10.97	25.96	30.94	1.911e-07	8.06e-07	7.996e-07	1.061e-07	3.844e-07	5.045e-07	4.21769	4.1842	0.555207	2.01151	2.63998
E9PCG9	E9PCG9_HUMAN D-beta-hydroxybutyrate dehydrogenase, mitochondrial OS=Homo sapiens GN=BDH1 PE=2 SV=1	256	38222.5	Q02338;	5	2	14.1		0.99		1.99	0.99	0.99		2.751e-08		1.784e-07	2.36e-08	7.977e-08		Control1 Only	6.48491	0.85787	2.89967	Control1 Only
Q9Y6I8	PXMP4_HUMAN Peroxisomal membrane protein 4 OS=Homo sapiens GN=PXMP4 PE=1 SV=3	212	24303		16	6	25.9	Oxidation (M)	5	1	1	2	4	3	4.984e-07	2.707e-07	1.471e-07	1.127e-07	1.019e-06	5.115e-07	0.543138	0.295144	0.226124	2.04454	1.02628
Q8IXQ6	PARP9_HUMAN Poly [ADP-ribose] polymerase 9 OS=Homo sapiens GN=PARP9 PE=1 SV=2	854	80437.6	Q8IXQ6-2;Q8IXQ6-3;	9	4	6.3			2	4		1	3		1.995e-08	4.95e-08		7.157e-09	2.615e-08	Control2 Only	Control3 Only		Sample2 Only	Sample3 Only
P62081	RS7_HUMAN 40S ribosomal protein S7 OS=Homo sapiens GN=RPS7 PE=1 SV=1	194	22167.3		23	9	43.8		7			12	1	3	1.204e-06			1.396e-06	2.735e-07	4.397e-07	Control1 Only	Control1 Only	1.15947	0.227159	0.365199
Q9BZK7	TBL1R_HUMAN F-box-like/WD repeat-containing protein TBL1XR1 OS=Homo sapiens GN=TBL1XR1 PE=1 SV=1	514	55704.2		22	11	26.5	Acetylation (Protein N-term)		6.96	5.97		4.97	3.98		3.805e-07	2.886e-07		2.057e-07	1.549e-07	Control2 Only	Control3 Only		Sample2 Only	Sample3 Only
C9IZQ1	C9IZQ1_HUMAN Translocon-associated protein subunit alpha OS=Homo sapiens GN=SSR1 PE=2 SV=1	298	29427.1	C9J3L8;C9J5W0;E9PAL7;F5H5Y2;P43307;P43307-2;	4	2	8.9		2			1		1	7.503e-08			3.25e-08		1.157e-07	Control1 Only	Control1 Only	0.43316	Control1 Only	1.54205
P35580	MYH10_HUMAN Myosin-10 OS=Homo sapiens GN=MYH10 PE=1 SV=3	1976	229434		856	143	65.2	Carbamidomethyl (C),Carbamidomethyl (C) + Ammonia-loss (N-term C),Gln->pyro-Glu (N-term Q),Oxidation (M)	163.23	126.62	75.15	245.36	65.25	175.07	7.389e-07	7.875e-07	2.735e-07	1.497e-06	4.492e-07	1.154e-06	1.06577	0.370145	2.02598	0.607931	1.56178
Q15370	ELOB_HUMAN Transcription elongation factor B polypeptide 2 OS=Homo sapiens GN=TCEB2 PE=1 SV=1	118	17935.8	Q15370-2;	119	12	66.9	Acetylation (Protein N-term),Carbamidomethyl (C),Oxidation (M)	26.81	16.85	16.85	28.79	12.88	15.86	1.183e-05	6.155e-06	5.556e-06	6.02e-06	4.283e-06	4.302e-06	0.520287	0.469653	0.508876	0.362046	0.363652
P50748	KNTC1_HUMAN Kinetochore-associated protein 1 OS=Homo sapiens GN=KNTC1 PE=1 SV=1	2209	251237		17	13	6.9	Glu->pyro-Glu (N-term E)	9	1	2	4	1		1.294e-08	3.032e-09	2.617e-09	6.524e-09	1.64e-09		0.234312	0.202241	0.504173	0.126739	Control1 Only
B7Z2G1	B7Z2G1_HUMAN Kelch-like protein 22 OS=Homo sapiens GN=KLHL22 PE=2 SV=1	491	71801.3	Q53GT1;	5	4	9.8		1		1		1.98	0.99	8.85e-09		8.211e-09		2.23e-08	1.368e-08	Control1 Only	0.927797	Control1 Only	2.51977	1.54576
Q9NUQ8	ABCF3_HUMAN ATP-binding cassette sub-family F member 3 OS=Homo sapiens GN=ABCF3 PE=1 SV=2	709	79132.8	Q9NUQ8-2;	50	11	17.4	Oxidation (M)	7	9	15	4	7	8	1.406e-07	2.392e-07	2.895e-07	7.276e-08	1.695e-07	1.22e-07	1.70128	2.05903	0.517496	1.20555	0.86771
H7C314	H7C314_HUMAN Src substrate cortactin (Fragment) OS=Homo sapiens GN=CTTN PE=4 SV=1	223	57575.6	Q14247;Q14247-2;Q14247-3;	9	3	14.3	Carbamidomethyl (C)		2	3		1	3		1.333e-07	1.802e-07		3.277e-08	1.315e-07	Control2 Only	Control3 Only		Sample2 Only	Sample3 Only
P16402	H13_HUMAN Histone H1.3 OS=Homo sapiens GN=HIST1H1D PE=1 SV=2	221	22390.3		24	21	51.6	Acetylation (Protein N-term)	9			14		1	1.178e-06			2.046e-06		2.089e-09	Control1 Only	Control1 Only	1.73684	Control1 Only	0.00177334
P15927	RFA2_HUMAN Replication protein A 32 kDa subunit OS=Homo sapiens GN=RPA2 PE=1 SV=1	270	38875.6	P15927-2;P15927-3;	125	12	61.9	Carbamidomethyl (C),Gln->pyro-Glu (N-term Q),Oxidation (M)	20	22	21	25	19	19	2.055e-06	5.078e-06	4.503e-06	1.77e-06	2.492e-06	2.821e-06	2.47105	2.19124	0.861314	1.21265	1.37275
P01857	IGHG1_HUMAN Ig gamma-1 chain C region OS=Homo sapiens GN=IGHG1 PE=1 SV=1	330	36173.2		40	8	28.5	Carbamidomethyl (C),Oxidation (M)	2	4	8	6	13	7	4.861e-08	2.864e-07	5.14e-07	9.883e-08	9.852e-07	4.085e-07	5.89179	10.574	2.03312	20.2674	8.40362
Q5T749	KPRP_HUMAN Keratinocyte proline-rich protein OS=Homo sapiens GN=KPRP PE=1 SV=1	579	64255.3		29	7	9.8	Carbamidomethyl (C)	2	5	5	2	10	6	1.162e-08	5.922e-08	5.983e-08	1.973e-08	1.746e-07	5.256e-08	5.09639	5.14888	1.69793	15.0258	4.52324
P04844	RPN2_HUMAN Dolichyl-diphosphooligosaccharide--protein glycosyltransferase subunit 2 OS=Homo sapiens GN=RPN2 PE=1 SV=3	631	67861.5	P04844-2;	30	8	23.3		3.99	5.98	7.97	3.99	3.99	3.98	1.197e-07	4.533e-07	4.036e-07	9.639e-08	3.269e-07	1.207e-07	3.78697	3.37176	0.805263	2.73099	1.00835
Q5T440	CAF17_HUMAN Putative transferase CAF17, mitochondrial OS=Homo sapiens GN=IBA57 PE=1 SV=1	356	38221.1		166	18	66.9	Carbamidomethyl (C),Oxidation (M)	34	30	30	30	21	26	4.138e-06	1.014e-05	8.629e-06	3.083e-06	5.063e-06	6.147e-06	2.45046	2.08531	0.745046	1.22354	1.4855
Q6BDS2	URFB1_HUMAN UHRF1-binding protein 1 OS=Homo sapiens GN=UHRF1BP1 PE=1 SV=1	1440	159799		57	17	15.1	Carbamidomethyl (C),Oxidation (M)	6	13	14	9	10	9	4.985e-08	1.926e-07	1.865e-07	6.058e-08	9.267e-08	7.885e-08	3.86359	3.74122	1.21525	1.85898	1.58175
Q9BVA1	TBB2B_HUMAN Tubulin beta-2B chain OS=Homo sapiens GN=TUBB2B PE=1 SV=1	445	50047		15	30	78	Carbamidomethyl (C),Oxidation (M)	1.99	0.99	1.99	1.98	4.99	2.99	4.128e-08	7.759e-08	1.12e-07	4.462e-08	2.412e-07	1.376e-07	1.8796	2.71318	1.08091	5.84302	3.33333
P00505	AATM_HUMAN Aspartate aminotransferase, mitochondrial OS=Homo sapiens GN=GOT2 PE=1 SV=3	430	47613.4		9	3	9.5		3	2	1	1	1	1	6.905e-08	1.486e-07	1.018e-07	3.04e-08	6.661e-08	7.445e-08	2.15206	1.47429	0.440261	0.964663	1.0782
Q96HY7	DHTK1_HUMAN Probable 2-oxoglutarate dehydrogenase E1 component DHKTD1, mitochondrial OS=Homo sapiens GN=DHTKD1 PE=1 SV=2	919	103281		15	6	7.5			4.99	3.99		3	3		8.167e-08	5.533e-08		3.398e-08	3.661e-08	Control2 Only	Control3 Only		Sample2 Only	Sample3 Only
B7Z4C8	B7Z4C8_HUMAN 60S ribosomal protein L31 OS=Homo sapiens GN=RPL31 PE=2 SV=1	130	14022.8	B7Z4E3;C9JU56;H7C2W9;P62899;P62899-2;P62899-3;	14	5	42.6	Oxidation (M)	7			6		1	2.13e-06			1.042e-06		1.946e-07	Control1 Only	Control1 Only	0.489202	Control1 Only	0.0913615
H7BY58	H7BY58_HUMAN Protein-L-isoaspartate O-methyltransferase OS=Homo sapiens GN=PCMT1 PE=2 SV=1	286	24717.6	J3KP72;P22061;P22061-2;	317	15	69.2	Carbamidomethyl (C),Oxidation (M)	56.88	56.89	56.89	56.87	40.9	47.88	1.176e-05	2.811e-05	2.809e-05	9.413e-06	1.732e-05	1.762e-05	2.39031	2.38861	0.800425	1.47279	1.4983
CONT_SRPP_HEVBR	Possible Contaminant SRPP_HEVBR	204	22384.8		18	5	31.9	Acetylation (Protein N-term)	2	3	4		5	4	9.597e-08	2.701e-07	3.643e-07		6.983e-07	5.678e-07	2.81442	3.79598	Control1 Only	7.27623	5.91643
P55884	EIF3B_HUMAN Eukaryotic translation initiation factor 3 subunit B OS=Homo sapiens GN=EIF3B PE=1 SV=3	814	99219.2	P55884-2;	29	8	10.4		1	7.98	6.99	1	6	6	3.897e-09	1.295e-07	1.177e-07	4.227e-09	4.366e-08	8.703e-08	33.2307	30.2027	1.08468	11.2035	22.3326
P15924	DESP_HUMAN Desmoplakin OS=Homo sapiens GN=DSP PE=1 SV=3	2871	332415		952	175	58.7	Carbamidomethyl (C),Carbamidomethyl (C) + Ammonia-loss (N-term C),Gln->pyro-Glu (N-term Q),Oxidation (M)	282.99	52	74	276.97	137	134	1.159e-06	1.354e-07	2.213e-07	1.175e-06	8.431e-07	5.315e-07	0.116825	0.19094	1.01381	0.727437	0.458585
Q9BUF5	TBB6_HUMAN Tubulin beta-6 chain OS=Homo sapiens GN=TUBB6 PE=1 SV=1	446	49951.1		38	18	46.4	Carbamidomethyl (C),Oxidation (M)	8	8	6	6	5	5	1.594e-07	5.656e-07	2.772e-07	1.193e-07	2.241e-07	2.256e-07	3.54831	1.73902	0.748432	1.4059	1.41531
Q16531	DDB1_HUMAN DNA damage-binding protein 1 OS=Homo sapiens GN=DDB1 PE=1 SV=1	1140	127212		1412	74	62.5	Acetylation (Protein N-term),Carbamidomethyl (C),Gln->pyro-Glu (N-term Q),Glu->pyro-Glu (N-term E),Oxidation (M)	210.91	293.83	259.27	174.42	239.57	213.95	7.869e-06	1.979e-05	1.746e-05	5.254e-06	1.202e-05	1.195e-05	2.51493	2.21883	0.667683	1.52751	1.51862
Q9NRD5	PICK1_HUMAN PRKCA-binding protein OS=Homo sapiens GN=PICK1 PE=1 SV=2	415	46678.7		12	5	14	Carbamidomethyl (C)	4		2	3	1	2	1.61e-07		1.5e-07	4.161e-08	2.915e-08	9.811e-08	Control1 Only	0.931677	0.258447	0.181056	0.609379
F5H365	F5H365_HUMAN Protein transport protein Sec23A OS=Homo sapiens GN=SEC23A PE=2 SV=1	736	86321.4	Q15436;	25	14	25.3	Acetylation (Protein N-term),Carbamidomethyl (C),Oxidation (M)	0.99	4.95	7.92	0.99	4.95	4.95	4.141e-09	5.058e-08	2.128e-07	3.653e-09	6.02e-08	8.049e-08	12.2144	51.3886	0.882154	14.5376	19.4373
P26373	RL13_HUMAN 60S ribosomal protein L13 OS=Homo sapiens GN=RPL13 PE=1 SV=4	211	24300.6		25	9	38.4		9.96		2	10.94	1	1	1.242e-06		1.904e-07	8.082e-07	1.094e-08	1.103e-08	Control1 Only	0.153301	0.650725	0.00880837	0.00888084
P14618	KPYM_HUMAN Pyruvate kinase PKM OS=Homo sapiens GN=PKM PE=1 SV=4	531	58044.1		359	30	67.4	Carbamidomethyl (C),Oxidation (M)	54.96	54.02	73.67	46.12	58.85	65.77	2.691e-06	5.92e-06	6.273e-06	1.853e-06	3.566e-06	3.962e-06	2.19993	2.3311	0.688592	1.32516	1.47232
P43246	MSH2_HUMAN DNA mismatch repair protein Msh2 OS=Homo sapiens GN=MSH2 PE=1 SV=1	934	104947		47	16	20.3	Carbamidomethyl (C)	1.98	8.94	15.88	1.98	9.93	7.95	3.293e-08	8.955e-08	2.123e-07	1.434e-08	7.83e-08	9.146e-08	2.7194	6.44701	0.435469	2.37777	2.77741
Q13263	TIF1B_HUMAN Transcription intermediary factor 1-beta OS=Homo sapiens GN=TRIM28 PE=1 SV=5	835	88727.6		699	39	58.3	Acetylation (Protein N-term),Carbamidomethyl (C),Gln->pyro-Glu (N-term Q),Oxidation (M)	60.65	169.83	144.04	62.63	141.12	123.22	1.572e-06	1.099e-05	7.743e-06	1.316e-06	6.158e-06	5.469e-06	6.99109	4.92557	0.83715	3.9173	3.47901
P20930	FILA_HUMAN Filaggrin OS=Homo sapiens GN=FLG PE=1 SV=3	4061	436128		9	2	0.4			2	1	1	2	3		1.504e-09	1.124e-09	3.182e-10	3.885e-09	2.115e-09	Control2 Only	Control3 Only	Sample1 Only	Sample2 Only	Sample3 Only
J3QRD1	J3QRD1_HUMAN Fatty aldehyde dehydrogenase OS=Homo sapiens GN=ALDH3A2 PE=2 SV=1	393	57776.8	P51648;P51648-2;	13	4	12.5		2	2	1	2	3	3	8.87e-08	8.908e-08	9.502e-08	6.971e-08	1.913e-07	2.208e-07	1.00428	1.07125	0.785908	2.15671	2.48929
J3KNQ3	J3KNQ3_HUMAN 26S proteasome non-ATPase regulatory subunit 13 OS=Homo sapiens GN=PSMD13 PE=2 SV=1	349	43023.1	Q9UNM6;Q9UNM6-2;	3	2	4.9		1		1	2			9.382e-09		5.175e-08	3.111e-08			Control1 Only	5.51588	3.31592	Control1 Only	Control1 Only
P46778	RL21_HUMAN 60S ribosomal protein L21 OS=Homo sapiens GN=RPL21 PE=1 SV=2	160	18589.1		14	4	25.6	Oxidation (M)	4.95			8.92	0.99		8.485e-07			1.309e-06	1.205e-07		Control1 Only	Control1 Only	1.54272	0.142015	Control1 Only
Q14566	MCM6_HUMAN DNA replication licensing factor MCM6 OS=Homo sapiens GN=MCM6 PE=1 SV=1	821	93065.4		52	15	21.7	Acetylation (Protein N-term),Carbamidomethyl (C),Oxidation (M)	3	13	16		9	11	3.503e-08	2.031e-07	2.361e-07		1.244e-07	1.436e-07	5.79789	6.73994	Control1 Only	3.55124	4.09934
O15260	SURF4_HUMAN Surfeit locus protein 4 OS=Homo sapiens GN=SURF4 PE=1 SV=3	269	21167.7	O15260-2;Q5T8U5;	11	5	40.9	Carbamidomethyl (C),Gln->pyro-Glu (N-term Q),Oxidation (M)	4		1	5	1		1.918e-07		8.983e-08	2.654e-07	2.272e-07		Control1 Only	0.468352	1.38373	1.18457	Control1 Only
P49748	ACADV_HUMAN Very long-chain specific acyl-CoA dehydrogenase, mitochondrial OS=Homo sapiens GN=ACADVL PE=1 SV=1	655	73078.8	P49748-2;P49748-3;	24	10	18.8		5.99	4	6	1	2.98	4	1.095e-07	1.776e-07	9.077e-08	1.962e-08	1.246e-07	6.81e-08	1.62192	0.82895	0.179178	1.1379	0.621918
P50991	TCPD_HUMAN T-complex protein 1 subunit delta OS=Homo sapiens GN=CCT4 PE=1 SV=4	539	54829.2	P50991-2;	46	10	20.2	Carbamidomethyl (C)	8.93	5.96	9.94	6.95	6.95	6.95	2.829e-07	3.65e-07	5.736e-07	1.969e-07	2.518e-07	2.694e-07	1.29021	2.02757	0.696006	0.890067	0.95228
P19387	RPB3_HUMAN DNA-directed RNA polymerase II subunit RPB3 OS=Homo sapiens GN=POLR2C PE=1 SV=2	275	31493.8		14	5	23.6		2	4	2	2	3	1	1.022e-07	4.463e-07	1.765e-07	6.149e-08	2.772e-07	7.946e-08	4.36693	1.72701	0.601663	2.71233	0.777495
P11586	C1TC_HUMAN C-1-tetrahydrofolate synthase, cytoplasmic OS=Homo sapiens GN=MTHFD1 PE=1 SV=3	935	101765		246	51	55.1	Carbamidomethyl (C),Gln->pyro-Glu (N-term Q),Oxidation (M)	12	29	27.5	11	23.5	20	2.692e-07	1.337e-06	1.258e-06	2.027e-07	7.327e-07	8.072e-07	4.96657	4.67311	0.752972	2.72177	2.99851
P25205	MCM3_HUMAN DNA replication licensing factor MCM3 OS=Homo sapiens GN=MCM3 PE=1 SV=3	808	91158.2		261	31	41.7	Acetylation (Protein N-term),Carbamidomethyl (C),Carbamidomethyl (C) + Ammonia-loss (N-term C),Oxidation (M)	21.79	67.35	59.44	16.84	45.57	48.53	3.768e-07	1.765e-06	1.588e-06	2.167e-07	9.528e-07	1.125e-06	4.68418	4.21444	0.575106	2.52866	2.98567
F5H2F4	F5H2F4_HUMAN C-1-tetrahydrofolate synthase, cytoplasmic OS=Homo sapiens GN=MTHFD1 PE=2 SV=1	1020	110832		246	51	50.5	Carbamidomethyl (C),Gln->pyro-Glu (N-term Q),Oxidation (M)	12	29	27.5	11	23.5	20	2.468e-07	1.226e-06	1.153e-06	1.858e-07	6.716e-07	7.399e-07	4.96759	4.6718	0.752836	2.72123	2.99797
Q14139	UBE4A_HUMAN Ubiquitin conjugation factor E4 A OS=Homo sapiens GN=UBE4A PE=1 SV=2	1066	123749	Q14139-2;	15	5	6	Oxidation (M)	1	3	4	1	4	2	1.203e-08	3.111e-08	4.451e-08	7.49e-09	2.474e-08	1.451e-08	2.58603	3.69992	0.62261	2.05653	1.20615
B3KNT8	B3KNT8_HUMAN Nucleosome assembly protein 1-like 1 OS=Homo sapiens GN=NAP1L1 PE=2 SV=1	368	45454	B3KV44;B7Z9C2;F5H4R6;F8VRJ2;F8VUX1;F8VV59;F8VXI6;F8VY35;F8W020;F8W0J6;F8W118;H0YHC3;H0YIV4;P55209;	7	2	23.7		2	1	1	1	1	1	1.126e-07	8.328e-08	8.486e-08	3.72e-08	5.921e-08	6.107e-08	0.739609	0.753641	0.330373	0.525844	0.542362
P31946	1433B_HUMAN 14-3-3 protein beta/alpha OS=Homo sapiens GN=YWHAB PE=1 SV=3	246	27904.8	P31946-2;	17	6	23.4	Oxidation (M)	2	2	2	3	5	3	1.08e-07	1.679e-07	1.897e-07	1.396e-07	3.318e-07	3.196e-07	1.55463	1.75648	1.29259	3.07222	2.95926
G3V295	G3V295_HUMAN Proteasome subunit alpha type OS=Homo sapiens GN=PSMA6 PE=2 SV=1	203	27453.9	G3V3I1;G3V3U4;G3V5Z7;P60900;	7	2	21.5		0.99		0.99	1.98	1.98	0.99	5.881e-08		1.47e-07	1.05e-07	1.387e-07	1.147e-07	Control1 Only	2.49957	1.78541	2.35844	1.95035
P62714	PP2AB_HUMAN Serine/threonine-protein phosphatase 2A catalytic subunit beta isoform OS=Homo sapiens GN=PPP2CB PE=1 SV=1	309	35661.4	P67775;	42	7	26.5	Oxidation (M)	6.93	4.95	9.89	7.92	3.96	7.91	4.019e-07	6.929e-07	1.435e-06	3.197e-07	4.621e-07	7.706e-07	1.72406	3.57054	0.795472	1.14979	1.91739
Q13347	EIF3I_HUMAN Eukaryotic translation initiation factor 3 subunit I OS=Homo sapiens GN=EIF3I PE=1 SV=1	325	36568.7		11	4	14.8		1	3	2	2	2	1	2.982e-08	2.626e-07	1.921e-07	3.887e-08	1.706e-07	7.037e-08	8.80617	6.44199	1.30349	5.72099	2.35983
P62829	RL23_HUMAN 60S ribosomal protein L23 OS=Homo sapiens GN=RPL23 PE=1 SV=1	140	14892.1		38	7	51.4	Carbamidomethyl (C),Oxidation (M)	17.84	2.97	1.98	11.9	0.99	1.98	2.576e-06	3.817e-07	3.41e-07	1.476e-06	1.992e-07	3.649e-07	0.148175	0.132376	0.572981	0.0773292	0.141654
P00491	PNPH_HUMAN Purine nucleoside phosphorylase OS=Homo sapiens GN=PNP PE=1 SV=2	289	32169.2		5	4	19.7		1		1	3			3.117e-08		5.716e-08	4.725e-08			Control1 Only	1.83381	1.51588	Control1 Only	Control1 Only
E9PAL9	E9PAL9_HUMAN 5'-nucleotidase domain-containing protein 2 OS=Homo sapiens GN=NT5DC2 PE=2 SV=1	557	57311	Q9H857;Q9H857-2;	20	10	25.9	Oxidation (M)	3.97	2.98	1	4.96	2.98	4.98	5.295e-08	1.177e-07	6.596e-08	7.316e-08	1.128e-07	2.23e-07	2.22285	1.2457	1.38168	2.13031	4.21152
P62280	RS11_HUMAN 40S ribosomal protein S11 OS=Homo sapiens GN=RPS11 PE=1 SV=3	158	18455		30	11	55.1	Acetylation (Protein N-term),Carbamidomethyl (C)	10.93			13.93	1.99	2.99	1.443e-06			1.282e-06	4.196e-07	6.376e-07	Control1 Only	Control1 Only	0.888427	0.290783	0.441857
Q9UHD8	SEPT9_HUMAN Septin-9 OS=Homo sapiens GN=SEPT9 PE=1 SV=2	586	63624.9	Q9UHD8-2;Q9UHD8-5;Q9UHD8-7;	15	6	12			1.98	6.93	0.99	0.99	4.95		9.919e-08	1.713e-07	5.96e-10	3.35e-08	1.187e-07	Control2 Only	Control3 Only	Sample1 Only	Sample2 Only	Sample3 Only
P17655	CAN2_HUMAN Calpain-2 catalytic subunit OS=Homo sapiens GN=CAPN2 PE=1 SV=6	700	80142.9		18	8	11.4	Oxidation (M)			7		4	7			8.692e-08		3.843e-08	1.176e-07		Control3 Only		Sample2 Only	Sample3 Only
P10809	CH60_HUMAN 60 kDa heat shock protein, mitochondrial OS=Homo sapiens GN=HSPD1 PE=1 SV=2	573	61178.5		92	21	42.4	Carbamidomethyl (C),Oxidation (M)	12.96	16.96	18.97	10.99	13	19	3.126e-07	9.116e-07	1.117e-06	2.33e-07	4.92e-07	7.141e-07	2.91619	3.57326	0.745361	1.5739	2.28439
F8VTV8	F8VTV8_HUMAN Cyclin-dependent kinase 4 OS=Homo sapiens GN=CDK4 PE=2 SV=1	201	33798.4	F8VWX7;F8VYH9;P11802;	5	3	17.1		0.99		0.99	0.99	0.99	0.99	1.099e-07		2.302e-07	6.905e-08	2.397e-07	2.686e-07	Control1 Only	2.09463	0.628298	2.18107	2.44404
P15531	NDKA_HUMAN Nucleoside diphosphate kinase A OS=Homo sapiens GN=NME1 PE=1 SV=1	152	19676.9	P15531-2;	75	7	46.7	Carbamidomethyl (C),Oxidation (M)	22.42	8.73	10.67	18.5	7.76	4.85	7.138e-06	4.255e-06	4.601e-06	5.004e-06	2.962e-06	2.476e-06	0.596105	0.644578	0.701037	0.414962	0.346876
A1A528	A1A528_HUMAN Centromere/kinetochore protein zw10 homolog OS=Homo sapiens GN=ZW10 PE=2 SV=1	672	88989	O43264;	9	6	11.6	Acetylation (Protein N-term),Oxidation (M)	2	3	2	1		1	4.779e-08	2.536e-08	2.092e-08	4.578e-08		5.2e-09	0.530655	0.437748	0.957941	Control1 Only	0.108809
Q15393	SF3B3_HUMAN Splicing factor 3B subunit 3 OS=Homo sapiens GN=SF3B3 PE=1 SV=4	1217	135852		16	9	9.8		10			5		1	1.084e-07			5.386e-08		5.49e-09	Control1 Only	Control1 Only	0.496863	Control1 Only	0.0506458
O75323	NIPS2_HUMAN Protein NipSnap homolog 2 OS=Homo sapiens GN=GBAS PE=1 SV=1	286	33793.3		28	7	24.1	Oxidation (M)	5.96	4.95	5.95	6.95	1.99	2.98	4.052e-07	1.188e-06	1.148e-06	3.491e-07	5.609e-07	7.91e-07	2.93189	2.83317	0.86155	1.38425	1.95212
Q8N163	CCAR2_HUMAN Cell cycle and apoptosis regulator protein 2 OS=Homo sapiens GN=CCAR2 PE=1 SV=2	923	103108		35	12	19.3	Carbamidomethyl (C),Oxidation (M)	1.98	10.89	9.89	0.99	6.93	3.96	1.74e-08	7.788e-08	9.321e-08	6.949e-09	5.301e-08	4.633e-08	4.47586	5.3569	0.399368	3.04655	2.66264
F5GY05	F5GY05_HUMAN Constitutive coactivator of peroxisome proliferator-activated receptor gamma OS=Homo sapiens GN=FAM120B PE=2 SV=1	933	103986	F5GZX9;Q96EK7;	379	35	42.4	Carbamidomethyl (C),Gln->pyro-Glu (N-term Q),Oxidation (M)	46.51	74.21	84.11	41.54	55.41	73.23	1.307e-06	3.064e-06	3.439e-06	9.009e-07	1.726e-06	2.384e-06	2.3443	2.63122	0.689288	1.32058	1.82402
Q96LD4	TRI47_HUMAN Tripartite motif-containing protein 47 OS=Homo sapiens GN=TRIM47 PE=1 SV=2	638	69668		5	5	9.6	Carbamidomethyl (C)	2.99			1	1		4.26e-08			9.751e-09	1.303e-08		Control1 Only	Control1 Only	0.228897	0.305869	Control1 Only
Q9BW61	DDA1_HUMAN DET1- and DDB1-associated protein 1 OS=Homo sapiens GN=DDA1 PE=1 SV=1	102	11846		26	6	62.7	Carbamidomethyl (C),Oxidation (M)	9	2	3	10	1	1	1.47e-06	3.599e-07	6.135e-07	1.237e-06	2.607e-07	2.231e-08	0.24483	0.417347	0.841497	0.177347	0.0151769
M0R0F0	M0R0F0_HUMAN 40S ribosomal protein S5 (Fragment) OS=Homo sapiens GN=RPS5 PE=2 SV=1	200	22916.1	P46782;	18	10	50.5	Acetylation (Protein N-term),Carbamidomethyl (C)	6.94			9.94		0.99	4.561e-07			6.45e-07		1.096e-07	Control1 Only	Control1 Only	1.41416	Control1 Only	0.240298
P28799	GRN_HUMAN Granulins OS=Homo sapiens GN=GRN PE=1 SV=2	593	63661.9		211	17	25.6	Carbamidomethyl (C),Carbamidomethyl (C) + Ammonia-loss (N-term C),Oxidation (M)	10.83	52.2	50.22	10.84	41.38	44.32	5.018e-07	6.628e-06	5.055e-06	4.415e-07	3.426e-06	4.115e-06	13.2084	10.0737	0.879833	6.82742	8.20048
J3KR97	J3KR97_HUMAN Tubulin-specific chaperone D OS=Homo sapiens GN=TBCD PE=2 SV=1	1230	138940	Q9BTW9;Q9BTW9-4;	26	8	9.1		2.95	6.89	5.91	1.96	3.92	4.94	1.638e-08	8.01e-08	6.644e-08	8.704e-09	3.055e-08	5.309e-08	4.89011	4.05617	0.53138	1.86508	3.24115
Q96J66	ABCCB_HUMAN ATP-binding cassette sub-family C member 11 OS=Homo sapiens GN=ABCC11 PE=1 SV=1	1382	150392	Q96J66-2;	3	2	1.9			1	1		1			3.104e-09	5.106e-09		3.647e-09		Control2 Only	Control3 Only		Sample2 Only
B5MC07	B5MC07_HUMAN Anterior gradient protein 2 homolog OS=Homo sapiens GN=AGR2 PE=2 SV=1	188	22277.7	O95994;Q4JM47;	20	4	22.3	Oxidation (M)	5.95		0.99	6.95	5.97	1	3.874e-07		1.755e-07	4.492e-07	3.509e-07	1.217e-07	Control1 Only	0.45302	1.15953	0.905782	0.314146
P62805	H4_HUMAN Histone H4 OS=Homo sapiens GN=HIST1H4A PE=1 SV=2	103	11378.4		355	19	59.2	Oxidation (M)	134	10	11	143	29	28	0.0006709	2.447e-06	2.679e-06	0.0004672	9.927e-06	1.412e-05	0.00364734	0.00399314	0.696378	0.0147965	0.0210464
P54136	SYRC_HUMAN Arginine--tRNA ligase, cytoplasmic OS=Homo sapiens GN=RARS PE=1 SV=2	660	75511		185	26	41.8	Carbamidomethyl (C),Oxidation (M)	21.8	34.68	43.62	14.86	34.68	35.65	5.631e-07	2.034e-06	1.727e-06	3.428e-07	1.275e-06	1.139e-06	3.61215	3.06695	0.608773	2.26425	2.02273
P40939	ECHA_HUMAN Trifunctional enzyme subunit alpha, mitochondrial OS=Homo sapiens GN=HADHA PE=1 SV=2	763	83163		158	26	39.4	Carbamidomethyl (C),Oxidation (M)	13	42	40	9	26	28	2.297e-07	7.749e-07	8.465e-07	1.216e-07	4.679e-07	5.63e-07	3.37353	3.68524	0.529386	2.037	2.45102
Q3SY84	K2C71_HUMAN Keratin, type II cytoskeletal 71 OS=Homo sapiens GN=KRT71 PE=1 SV=3	523	57400.1		5	14	23.9				2	1		2			1.613e-08	4.272e-09		2.642e-08		Control3 Only	Sample1 Only		Sample3 Only
P14868	SYDC_HUMAN Aspartate--tRNA ligase, cytoplasmic OS=Homo sapiens GN=DARS PE=1 SV=2	501	57244.1		136	25	57.5	Carbamidomethyl (C),Gln->pyro-Glu (N-term Q),Oxidation (M)	15.85	25.81	32.74	14.88	20.82	25.78	6.493e-07	2.861e-06	3.658e-06	4.871e-07	1.877e-06	2.309e-06	4.40628	5.63376	0.750193	2.89081	3.55614
P18583	SON_HUMAN Protein SON OS=Homo sapiens GN=SON PE=1 SV=4	2426	268662	P18583-5;P18583-7;P18583-9;	79	17	9.8	Oxidation (M)	44.63	1.96	0.98	28.77		1.97	1.686e-07	1.136e-08	5.858e-09	1.016e-07		5.425e-09	0.0673784	0.034745	0.60261	Control1 Only	0.0321767
P16152	CBR1_HUMAN Carbonyl reductase [NADPH] 1 OS=Homo sapiens GN=CBR1 PE=1 SV=3	277	30427.9		23	8	33.2	Acetylation (Protein N-term)	4.98	3	5	2	2	4	2.082e-07	2.963e-07	5.061e-07	6.018e-08	2.308e-07	3.302e-07	1.42315	2.43084	0.289049	1.10855	1.58598
Q86X76	NIT1_HUMAN Nitrilase homolog 1 OS=Homo sapiens GN=NIT1 PE=1 SV=2	327	34391.3	Q86X76-2;Q86X76-4;	23	10	37.5	Carbamidomethyl (C)	2	2	2	2	1.5	2	1.225e-07	3.302e-07	3.169e-07	8.795e-08	1.826e-07	1.994e-07	2.69551	2.58694	0.717959	1.49061	1.62776
O00487	PSDE_HUMAN 26S proteasome non-ATPase regulatory subunit 14 OS=Homo sapiens GN=PSMD14 PE=1 SV=1	310	34644.6		5	2	7.4		1	1	1	1	1		5.027e-08	1.055e-07	1.281e-07	5.837e-08	1.092e-07		2.09867	2.54824	1.16113	2.17227	Control1 Only
P78347	GTF2I_HUMAN General transcription factor II-I OS=Homo sapiens GN=GTF2I PE=1 SV=2	998	110325	P78347-2;P78347-3;P78347-4;	53	16	18.5	Acetylation (Protein N-term)		10	20.98		8	13.99		1.268e-07	3.425e-07		7.016e-08	2.115e-07	Control2 Only	Control3 Only		Sample2 Only	Sample3 Only
Q09666	AHNK_HUMAN Neuroblast differentiation-associated protein AHNAK OS=Homo sapiens GN=AHNAK PE=1 SV=2	5890	630464		25	11	5.1	Acetylation (Protein N-term),Oxidation (M)	3	3	3	3	5	8	1.95e-09	2.936e-09	3.216e-09	1.16e-09	4.875e-09	9.228e-09	1.50564	1.64923	0.594872	2.5	4.73231
Q86X76-3	NIT1_HUMAN Isoform 4 of Nitrilase homolog 1 OS=Homo sapiens GN=NIT1	367	40282.1		23	10	29.7	Carbamidomethyl (C)	2	2	2	2	1.5	2	1.092e-07	2.942e-07	2.823e-07	7.836e-08	1.627e-07	1.776e-07	2.69414	2.58516	0.717582	1.48993	1.62637
B4DW73	B4DW73_HUMAN Phosphoenolpyruvate carboxykinase [GTP], mitochondrial OS=Homo sapiens GN=PCK2 PE=2 SV=1	506	70864.8	Q16822;	34	7	15.4	Carbamidomethyl (C)	0.99	4.91	7.86	1.98	10.8	6.88	3.791e-09	2.091e-07	2.011e-07	2.555e-08	4.009e-07	2.439e-07	55.157	53.0467	6.73965	105.75	64.3366
P49419-2	AL7A1_HUMAN Isoform 2 of Alpha-aminoadipic semialdehyde dehydrogenase OS=Homo sapiens GN=ALDH7A1	511	55475.5		94	18	37	Acetylation (Protein N-term),Carbamidomethyl (C),Oxidation (M)	12.85	18.79	18.77	12.85	14.83	14.82	3.599e-07	1.47e-06	1.44e-06	2.884e-07	9.374e-07	8.836e-07	4.08447	4.00111	0.801334	2.60461	2.45513
P08238	HS90B_HUMAN Heat shock protein HSP 90-beta OS=Homo sapiens GN=HSP90AB1 PE=1 SV=4	724	83428.2		214	45	56.5	Carbamidomethyl (C),Gln->pyro-Glu (N-term Q),Oxidation (M)	19.96	53.91	41.91	12.97	48.91	32.91	5.925e-07	3.105e-06	2.497e-06	3.592e-07	2.365e-06	1.347e-06	5.24051	4.21435	0.606245	3.99156	2.27342
O95881	TXD12_HUMAN Thioredoxin domain-containing protein 12 OS=Homo sapiens GN=TXNDC12 PE=1 SV=1	172	19229.6		116	10	71.5	Oxidation (M)	24	18	16	29	16	14	6.657e-06	6.554e-06	6.012e-06	4.802e-06	4.519e-06	3.731e-06	0.984528	0.90311	0.721346	0.678834	0.560463
P23921	RIR1_HUMAN Ribonucleoside-diphosphate reductase large subunit OS=Homo sapiens GN=RRM1 PE=1 SV=1	792	90246.7		59	15	21.5		2	17.86	14.9	2	10.93	10.92	2.733e-08	2.631e-07	2.403e-07	1.998e-08	1.482e-07	1.558e-07	9.62678	8.79254	0.731065	5.42261	5.7007
P49189	AL9A1_HUMAN 4-trimethylaminobutyraldehyde dehydrogenase OS=Homo sapiens GN=ALDH9A1 PE=1 SV=3	494	53911.1		99	14	33	Acetylation (Protein N-term),Carbamidomethyl (C),Oxidation (M)	17.98	16.98	18.98	17.97	13.98	14.98	9.829e-07	2.668e-06	2.932e-06	9.171e-07	1.584e-06	1.849e-06	2.71442	2.98301	0.933055	1.61156	1.88117
P07900	HS90A_HUMAN Heat shock protein HSP 90-alpha OS=Homo sapiens GN=HSP90AA1 PE=1 SV=5	732	98351.6	P07900-2;	169	37	44.7	Gln->pyro-Glu (N-term Q),Oxidation (M)	13.99	39.91	40.92	11.99	33.93	27.94	3.247e-07	1.461e-06	1.622e-06	2.639e-07	9.137e-07	1.031e-06	4.49954	4.99538	0.81275	2.81398	3.17524
P06733	ENOA_HUMAN Alpha-enolase OS=Homo sapiens GN=ENO1 PE=1 SV=2	434	47265.4		180	22	58.8	Carbamidomethyl (C),Oxidation (M)	31.85	27.85	30.87	22.92	36.88	23.93	1.48e-06	3.087e-06	3.487e-06	9.765e-07	2.356e-06	2.022e-06	2.08581	2.35608	0.659797	1.59189	1.36622
Q9UN37	VPS4A_HUMAN Vacuolar protein sorting-associated protein 4A OS=Homo sapiens GN=VPS4A PE=1 SV=1	437	48993.1		13	5	15.6		4.98	1	1	2.98	0.99	1.99	1.322e-07	2.986e-09	6.021e-08	4.462e-08	3.732e-08	3.346e-08	0.022587	0.455446	0.337519	0.2823	0.253101
P05198	IF2A_HUMAN Eukaryotic translation initiation factor 2 subunit 1 OS=Homo sapiens GN=EIF2S1 PE=1 SV=3	315	36179.4		36	13	36.8	Carbamidomethyl (C),Oxidation (M)	6.97	3.98	4.97	6.95	2	10.92	2.489e-07	3.4e-07	4.139e-07	2.033e-07	1.485e-07	1.222e-06	1.36601	1.66292	0.816794	0.596625	4.9096
O75369	FLNB_HUMAN Filamin-B OS=Homo sapiens GN=FLNB PE=1 SV=2	2602	277540	O75369-2;O75369-3;O75369-6;O75369-8;O75369-9;	21	13	6.9		2.97	6.92	1.98	1.98	1.98	4.95	2.851e-09	1.354e-08	6.374e-09	1.595e-09	3.249e-09	7.509e-09	4.74921	2.23571	0.559453	1.1396	2.63381
P14174	MIF_HUMAN Macrophage migration inhibitory factor OS=Homo sapiens GN=MIF PE=1 SV=4	115	12486.2		22	3	23.5	Carbamidomethyl (C),Oxidation (M)	9	1	1	8	2	1	4.253e-06	3.803e-07	3.465e-07	2.62e-06	4.143e-07	2.373e-07	0.0894192	0.0814719	0.616036	0.0974136	0.0557959
O43707	ACTN4_HUMAN Alpha-actinin-4 OS=Homo sapiens GN=ACTN4 PE=1 SV=2	911	105059		34	13	17.1	Oxidation (M)	0.97	9.81	10.82	1.96	3.91	5.91	1.884e-08	1.134e-07	1.494e-07	3.705e-08	5.455e-08	7.698e-08	6.01911	7.92994	1.96656	2.89544	4.08599
Q8TD19	NEK9_HUMAN Serine/threonine-protein kinase Nek9 OS=Homo sapiens GN=NEK9 PE=1 SV=2	979	107388		25	7	9		3	6	6	2	4	4	2.025e-08	6.143e-08	4.266e-08	1.009e-08	3.181e-08	3.073e-08	3.03358	2.10667	0.498272	1.57086	1.51753
Q9Y5M8	SRPRB_HUMAN Signal recognition particle receptor subunit beta OS=Homo sapiens GN=SRPRB PE=1 SV=3	271	29755.8		25	5	25.5	Carbamidomethyl (C)	5	3	5	5	2	5	3.138e-07	5.24e-07	6.81e-07	2.515e-07	2.631e-07	4.512e-07	1.66985	2.17017	0.801466	0.838432	1.43786
Q96NB2	SFXN2_HUMAN Sideroflexin-2 OS=Homo sapiens GN=SFXN2 PE=1 SV=2	322	36297.8		25	8	28.3	Acetylation (Protein N-term),Oxidation (M)	2.98	2.99	3.98	2.99	3.98	7.97	7.733e-08	2.336e-07	3.294e-07	5.826e-08	1.88e-07	7.657e-07	3.02082	4.25967	0.753395	2.43114	9.90172
E9PLK3	E9PLK3_HUMAN Puromycin-sensitive aminopeptidase OS=Homo sapiens GN=NPEPPS PE=2 SV=1	915	103481	P55786;	163	28	36	Oxidation (M)	6.93	51.32	30.6	4.95	36.55	25.67	6.283e-08	9.597e-07	5.718e-07	4.596e-08	5.409e-07	4.325e-07	15.2746	9.10075	0.731498	8.60894	6.88365
B4DRT2	B4DRT2_HUMAN 28S ribosomal protein S27, mitochondrial OS=Homo sapiens GN=MRPS27 PE=2 SV=1	428	47689.4	G5EA06;Q92552;	16	5	19.6		3.99	0.99	2	2.99	2	3.99	8.366e-08	2.433e-08	1.138e-07	7.39e-08	1.018e-07	1.863e-07	0.29082	1.36027	0.883337	1.21683	2.22687
Q8WUY1	THEM6_HUMAN Protein THEM6 OS=Homo sapiens GN=THEM6 PE=1 SV=2	208	23903.9		18	6	27.4	Carbamidomethyl (C),Oxidation (M)	4	2	1	4	3	4	1.549e-07	2.311e-07	1.446e-07	1.37e-07	2.938e-07	4.104e-07	1.49193	0.933505	0.884442	1.89671	2.64945
Q9Y4C2	F115A_HUMAN Protein FAM115A OS=Homo sapiens GN=FAM115A PE=1 SV=3	921	102097	Q9Y4C2-2;	38	13	15.1		1	10	11	3	8	5	5.021e-09	1.113e-07	1.208e-07	1.951e-08	7.098e-08	5.233e-08	22.1669	24.059	3.88568	14.1366	10.4222
Q9BPX3	CND3_HUMAN Condensin complex subunit 3 OS=Homo sapiens GN=NCAPG PE=1 SV=1	1015	114550		3	2	2.4			1	1	1				6.822e-09	4.525e-09	5.678e-09			Control2 Only	Control3 Only	Sample1 Only
Q08380	LG3BP_HUMAN Galectin-3-binding protein OS=Homo sapiens GN=LGALS3BP PE=1 SV=1	585	65451.4		15	5	10.1		0.99	3.98	3.98	0.99	2.99	1.99	5.303e-09	3.737e-08	4.067e-08	4.017e-09	3.056e-08	1.396e-08	7.04695	7.66924	0.757496	5.76278	2.63247
F5H897	F5H897_HUMAN Heat shock protein 75 kDa, mitochondrial OS=Homo sapiens GN=TRAP1 PE=2 SV=1	651	80257.8	Q12931;	23	8	16.4		2.99	3.99	3.99	3.99	2.99	4.98	5.45e-08	1.404e-07	9.892e-08	5.679e-08	3.51e-08	8.714e-08	2.57615	1.81505	1.04202	0.644037	1.5989
P53618	COPB_HUMAN Coatomer subunit beta OS=Homo sapiens GN=COPB1 PE=1 SV=3	953	107344		99	18	24.8	Carbamidomethyl (C),Oxidation (M)	12	18	27	9	18	16	1.889e-07	3.722e-07	4.163e-07	8.276e-08	2.87e-07	2.496e-07	1.97035	2.20381	0.438115	1.51932	1.32133
Q5T4S7	UBR4_HUMAN E3 ubiquitin-protein ligase UBR4 OS=Homo sapiens GN=UBR4 PE=1 SV=1	5183	271288	Q5T4S7-2;Q5T4S7-3;Q5T4S7-4;Q5T4S7-5;	4	2	0.9		1	1	1	1			4.918e-10	1.059e-09	9.066e-10	6.451e-10			2.15331	1.84343	1.31171	Control1 Only	Control1 Only
P50454	SERPH_HUMAN Serpin H1 OS=Homo sapiens GN=SERPINH1 PE=1 SV=2	418	46519.2		129	15	47.4	Oxidation (M)	17.74	20.72	25.66	22.65	17.73	22.67	5.709e-07	2.545e-06	2.971e-06	5.87e-07	1.331e-06	2.161e-06	4.45787	5.20406	1.0282	2.33141	3.78525
Q96RQ1	ERGI2_HUMAN Endoplasmic reticulum-Golgi intermediate compartment protein 2 OS=Homo sapiens GN=ERGIC2 PE=1 SV=2	377	42629.5		13	4	9.5		1.98	1.98	2.97	1.98	1.98	1.98	4.52e-08	1.723e-07	9.918e-08	3.403e-08	7.289e-08	8.709e-08	3.81195	2.19425	0.752876	1.61261	1.92677
Q13045	FLII_HUMAN Protein flightless-1 homolog OS=Homo sapiens GN=FLII PE=1 SV=2	1269	138765	Q13045-2;	17	7	6.6	Acetylation (Protein N-term),Oxidation (M)	2	7	3		2	4	4.279e-09	4.628e-08	1.915e-08		1.277e-08	2.762e-08	10.8156	4.47534	Control1 Only	2.98434	6.45478
Q9H900	ZWILC_HUMAN Protein zwilch homolog OS=Homo sapiens GN=ZWILCH PE=1 SV=2	591	67333.9		3	2	4.1		1		1	1			2.061e-08		5.068e-09	1.403e-08			Control1 Only	0.2459	0.680738	Control1 Only	Control1 Only
P23246	SFPQ_HUMAN Splicing factor, proline- and glutamine-rich OS=Homo sapiens GN=SFPQ PE=1 SV=2	707	76299.7		49	14	19.2	Oxidation (M)	4	9	14.97	5	7	8.98	8.643e-08	2.238e-07	4.649e-07	8.677e-08	1.709e-07	2.338e-07	2.58938	5.37892	1.00393	1.97732	2.70508
F5H5D3	F5H5D3_HUMAN Tubulin alpha-1C chain OS=Homo sapiens GN=TUBA1C PE=2 SV=1	519	49989.5	Q9BQE3;	40	30	71.3	Carbamidomethyl (C),Gln->pyro-Glu (N-term Q),Glu->pyro-Glu (N-term E),Oxidation (M)	6	6.5	6.5	6.5	5	6	1.678e-07	9.487e-07	6.253e-07	1.257e-07	4.923e-07	5.149e-07	5.65375	3.72646	0.749106	2.93385	3.06853
Q15067	ACOX1_HUMAN Peroxisomal acyl-coenzyme A oxidase 1 OS=Homo sapiens GN=ACOX1 PE=1 SV=3	660	74800.2	Q15067-2;	37	10	21.7		7.98	6.97	6.99	4.98	4.98	4.99	1.227e-07	3.138e-07	2.006e-07	8.999e-08	1.589e-07	1.546e-07	2.55746	1.63488	0.733415	1.29503	1.25998
P62906	RL10A_HUMAN 60S ribosomal protein L10a OS=Homo sapiens GN=RPL10A PE=1 SV=2	217	24869.6		45	13	50.2	Carbamidomethyl (C),Oxidation (M)	13	1	4	20	4	3	1.439e-06	3.355e-08	1.616e-07	1.678e-06	4.139e-07	3.757e-07	0.0233148	0.1123	1.16609	0.28763	0.261084
D6RFM5	D6RFM5_HUMAN Succinate dehydrogenase [ubiquinone] flavoprotein subunit, mitochondrial OS=Homo sapiens GN=SDHA PE=2 SV=1	583	72843.4	E9PBJ5;P31040;	19	4	7.9		3	3	4	1	4	4	1.1e-07	2.403e-07	3.22e-07	1.996e-08	2.348e-07	1.723e-07	2.18455	2.92727	0.181455	2.13455	1.56636
Q13162	PRDX4_HUMAN Peroxiredoxin-4 OS=Homo sapiens GN=PRDX4 PE=1 SV=1	271	30592.9		113	14	57.6	Carbamidomethyl (C),Gln->pyro-Glu (N-term Q)	21.89	17.94	16.94	22.91	15.95	18.92	2.262e-06	6.453e-06	5.934e-06	1.865e-06	3.986e-06	4.276e-06	2.85279	2.62334	0.824492	1.76216	1.89036
Q9Y6N5	SQRD_HUMAN Sulfide:quinone oxidoreductase, mitochondrial OS=Homo sapiens GN=SQRDL PE=1 SV=1	450	50054.9		22	7	21.1			4.96	6.96	0.99	2.97	5.95		3.096e-07	5.963e-07	7.519e-09	1.239e-07	4.526e-07	Control2 Only	Control3 Only	Sample1 Only	Sample2 Only	Sample3 Only
B9EGP5	B9EGP5_HUMAN MON2 protein OS=Homo sapiens GN=MON2 PE=2 SV=1	1711	190742	F8VWA6;F8W1Z6;Q7Z3U7;Q7Z3U7-2;Q7Z3U7-4;	20	8	5.6		3	3	5.99	1.99	3	2.99	1.948e-08	1.739e-08	4.547e-08	4.347e-09	2.033e-08	2.452e-08	0.89271	2.33419	0.223152	1.04363	1.25873
Q0PNE2	ELP6_HUMAN Elongator complex protein 6 OS=Homo sapiens GN=ELP6 PE=1 SV=1	266	29846.4		13	6	25.9		1.99	1.98	1	2.98	1.99	2.97	6.785e-08	1.728e-07	9.288e-08	8.185e-08	1.631e-07	2.776e-07	2.54679	1.3689	1.20634	2.40383	4.09138
P47897	SYQ_HUMAN Glutamine--tRNA ligase OS=Homo sapiens GN=QARS PE=1 SV=1	775	87959		192	35	48.9	Acetylation (Protein N-term),Carbamidomethyl (C),Gln->pyro-Glu (N-term Q),Oxidation (M)	4.94	56.43	45.54	3.94	41.6	38.66	8.46e-08	1.86e-06	1.528e-06	1.019e-07	1.238e-06	9.909e-07	21.9858	18.0615	1.20449	14.6336	11.7128
P61313	RL15_HUMAN 60S ribosomal protein L15 OS=Homo sapiens GN=RPL15 PE=1 SV=2	204	24185.1		20	7	33.8	Gln->pyro-Glu (N-term Q)	4.96	0.99	0.99	9.9	1.98	1.98	6.169e-07	3.356e-08	2.07e-07	6.698e-07	3.278e-07	3.066e-07	0.054401	0.335549	1.08575	0.531367	0.497001
P06753	TPM3_HUMAN Tropomyosin alpha-3 chain OS=Homo sapiens GN=TPM3 PE=1 SV=2	285	33001.8		148	32	54	Oxidation (M)	21.86	15.2	15.17	59.98	14.21	14.21	2.493e-06	3.293e-06	2.967e-06	8.504e-06	1.776e-06	2.24e-06	1.3209	1.19013	3.41115	0.712395	0.898516
P55060	XPO2_HUMAN Exportin-2 OS=Homo sapiens GN=CSE1L PE=1 SV=3	971	107979	P55060-3;	139	22	22.9	Acetylation (Protein N-term),Carbamidomethyl (C),Oxidation (M)	31.68	17.82	23.76	35.64	13.86	15.84	7.485e-07	1.01e-06	1.197e-06	7.341e-07	5.477e-07	7.148e-07	1.34937	1.5992	0.980762	0.73173	0.954977
Q07960	RHG01_HUMAN Rho GTPase-activating protein 1 OS=Homo sapiens GN=ARHGAP1 PE=1 SV=1	439	50530.3		49	12	32.8	Oxidation (M)	1.99	14.96	10.97		11.97	8.98	3.932e-08	1.423e-06	1.075e-06		9.82e-07	7.247e-07	36.1902	27.3398	Control1 Only	24.9746	18.4308
B4DVB8	B4DVB8_HUMAN ELAV-like protein 1 OS=Homo sapiens GN=ELAVL1 PE=2 SV=1	353	36159.2	Q15717;	6	3	11.7		2			3	1		8.399e-08			9.27e-08	4.336e-08		Control1 Only	Control1 Only	1.1037	0.516252	Control1 Only
P02538	K2C6A_HUMAN Keratin, type II cytoskeletal 6A OS=Homo sapiens GN=KRT6A PE=1 SV=3	564	60170.4		78	57	70.9	Acetylation (Protein N-term),Carbamidomethyl (C),Gln->pyro-Glu (N-term Q),Glu->pyro-Glu (N-term E),Oxidation (M)	5.98	11.95	17.94	10.95	14.94	15.94	1.79e-07	7.855e-07	2.198e-06	4.114e-07	2.419e-06	1.782e-06	4.38827	12.2793	2.29832	13.514	9.95531
Q9HCC0	MCCB_HUMAN Methylcrotonoyl-CoA carboxylase beta chain, mitochondrial OS=Homo sapiens GN=MCCC2 PE=1 SV=1	563	57626.5	Q9HCC0-2;	36	12	29.1	Carbamidomethyl (C)	15	2	4	9	3	3	3.853e-07	8.174e-08	1.781e-07	1.9e-07	1.056e-07	1.224e-07	0.212146	0.462237	0.493122	0.274072	0.317675
Q02413	DSG1_HUMAN Desmoglein-1 OS=Homo sapiens GN=DSG1 PE=1 SV=2	1049	113982		110	20	28.5	Carbamidomethyl (C),Oxidation (M)	15	19	22	14	30	11	5.979e-08	1.223e-07	1.499e-07	7.843e-08	3.554e-07	7.964e-08	2.04549	2.50711	1.31176	5.94414	1.332
Q9C0C2	TB182_HUMAN 182 kDa tankyrase-1-binding protein OS=Homo sapiens GN=TNKS1BP1 PE=1 SV=4	1729	182189		16	5	3.9		1	4	2	1	4	4	3.268e-09	1.576e-08	1.092e-08	5.444e-09	2.073e-08	2.376e-08	4.82252	3.34149	1.66585	6.34333	7.2705
P17987	TCPA_HUMAN T-complex protein 1 subunit alpha OS=Homo sapiens GN=TCP1 PE=1 SV=1	556	60467.7		92	17	36.9	Carbamidomethyl (C)	12.82	17.78	19.74	10.86	11.86	17.75	3.412e-07	1.135e-06	8.446e-07	2.674e-07	6.218e-07	6.773e-07	3.32649	2.47538	0.783705	1.82239	1.98505
CONT_PRDX1_HUMAN	Possible Contaminant PRDX1_HUMAN	199	22150.3	Q06830;	220	21	67.8	Carbamidomethyl (C),Gln->pyro-Glu (N-term Q),Oxidation (M)	23.5	36	34.5	32.5	37.5	33	7.431e-06	2.717e-05	2.968e-05	5.528e-06	2.133e-05	2.012e-05	3.6563	3.99408	0.743911	2.87041	2.70758
G3V4J7	G3V4J7_HUMAN DDB1- and CUL4-associated factor 5 OS=Homo sapiens GN=DCAF5 PE=2 SV=1	941	104169	Q96JK2;	393	26	31.6	Carbamidomethyl (C),Oxidation (M)	66.69	66.66	76.61	50.77	58.67	71.61	3.69e-06	7.514e-06	7.666e-06	2.495e-06	5.163e-06	5.741e-06	2.03631	2.07751	0.676152	1.39919	1.55583
Q86UY0	Q86UY0_HUMAN Protein BLOC1S5-TXNDC5 OS=Homo sapiens GN=TXNDC5 PE=2 SV=1	360	36245.1	Q8NBS9;Q8NBS9-2;	26	8	25.6	Carbamidomethyl (C)	4	6	4	3	5	4	1.156e-07	4.435e-07	3.774e-07	5.928e-08	2.707e-07	2.888e-07	3.83651	3.26471	0.512803	2.3417	2.49827
Q92820	GGH_HUMAN Gamma-glutamyl hydrolase OS=Homo sapiens GN=GGH PE=1 SV=2	318	36031.2		17	5	22.6	Oxidation (M)	1	3	4	2	4	3	2.74e-08	4.259e-07	7.126e-07	3.158e-08	4.272e-07	3.181e-07	15.5438	26.0073	1.15255	15.5912	11.6095
Q9HA64	KT3K_HUMAN Ketosamine-3-kinase OS=Homo sapiens GN=FN3KRP PE=1 SV=2	309	34480.3		134	14	41.4	Carbamidomethyl (C),Oxidation (M)	19.79	23.77	27.73	18.84	20.83	21.83	8.792e-07	3.865e-06	3.933e-06	7.897e-07	2.635e-06	2.662e-06	4.39604	4.47338	0.898203	2.99704	3.02775
C9JMU5	C9JMU5_HUMAN Probable ATP-dependent RNA helicase DDX17 OS=Homo sapiens GN=DDX17 PE=2 SV=1	652	72691.2	H3BLZ8;Q92841;Q92841-1;Q92841-2;Q92841-3;	8	8	13.8	Carbamidomethyl (C)	3		0.5	2			8.029e-08		8.428e-09	5.437e-08			Control1 Only	0.104969	0.67717	Control1 Only	Control1 Only
Q3LXA3	DHAK_HUMAN Bifunctional ATP-dependent dihydroxyacetone kinase/FAD-AMP lyase (cyclizing) OS=Homo sapiens GN=DAK PE=1 SV=2	575	59072.1		20	7	19	Carbamidomethyl (C)	4.97	3.98	0.99	6.97	1.99	1	9.618e-08	1.284e-07	4.035e-08	1.042e-07	4.874e-08	1.667e-08	1.335	0.419526	1.08339	0.506758	0.173321
Q6YN16	HSDL2_HUMAN Hydroxysteroid dehydrogenase-like protein 2 OS=Homo sapiens GN=HSDL2 PE=1 SV=1	418	45473.6		52	9	33	Carbamidomethyl (C)	6.96	9.95	11.95	7.96	5.96	8.95	2.313e-07	6.558e-07	8.155e-07	2.702e-07	3.413e-07	5.4e-07	2.83528	3.52572	1.16818	1.47557	2.33463
H0Y2P8	H0Y2P8_HUMAN SLIT-ROBO Rho GTPase-activating protein 2 (Fragment) OS=Homo sapiens GN=SRGAP2 PE=4 SV=1	985	121111	O75044;	3	2	2.2			0.99	0.99		0.99			8.828e-09	1.038e-08		1.087e-08		Control2 Only	Control3 Only		Sample2 Only
P49368	TCPG_HUMAN T-complex protein 1 subunit gamma OS=Homo sapiens GN=CCT3 PE=1 SV=4	545	60657.4		62	13	29.7	Carbamidomethyl (C),Oxidation (M)	11.85	9.88	10.88	9.88	7.89	10.88	4.866e-07	7.431e-07	7.13e-07	2.964e-07	4.22e-07	6.02e-07	1.52713	1.46527	0.609125	0.867242	1.23716
Q86YZ3	HORN_HUMAN Hornerin OS=Homo sapiens GN=HRNR PE=1 SV=2	2850	283074		492	31	28.1	Gln->pyro-Glu (N-term Q)	73	72	90	94	102	62	1.066e-07	1.725e-07	2.751e-07	1.693e-07	5.036e-07	1.586e-07	1.6182	2.58068	1.58818	4.7242	1.4878
P33992	MCM5_HUMAN DNA replication licensing factor MCM5 OS=Homo sapiens GN=MCM5 PE=1 SV=5	734	82449.3		447	42	66.8	Acetylation (Protein N-term),Carbamidomethyl (C),Carbamidomethyl (C) + Ammonia-loss (N-term C),Gln->pyro-Glu (N-term Q),Oxidation (M)	36.91	103.71	107.74	29.93	85.77	81.81	1.386e-06	5.202e-06	5.563e-06	8.519e-07	3.622e-06	4.169e-06	3.75325	4.01371	0.614646	2.61328	3.00794
C9JZR2	C9JZR2_HUMAN Catenin delta-1 OS=Homo sapiens GN=CTNND1 PE=2 SV=2	938	102270	O60716;O60716-10;O60716-11;O60716-12;O60716-13;O60716-14;O60716-15;O60716-16;O60716-17;O60716-18;O60716-19;O60716-2;O60716-20;O60716-21;O60716-22;O60716-23;O60716-24;O60716-3;O60716-4;O60716-5;O60716-6;O60716-7;O60716-8;O60716-9;	6	3	3.5		0.99	0.99	1.98	0.99		0.99	1.031e-08	8.137e-09	1.666e-08	1.096e-08		1.004e-08	0.789234	1.61591	1.06305	Control1 Only	0.973812
P00390	GSHR_HUMAN Glutathione reductase, mitochondrial OS=Homo sapiens GN=GSR PE=1 SV=2	522	47363.3	P00390-2;P00390-3;P00390-4;P00390-5;	59	12	33.6	Carbamidomethyl (C)	8.95	10.93	10.93	7.96	9.93	9.94	2.745e-07	9.513e-07	1.209e-06	1.992e-07	6.167e-07	8.607e-07	3.46557	4.40437	0.725683	2.24663	3.13552
F8WA86	F8WA86_HUMAN Calponin-3 OS=Homo sapiens GN=CNN3 PE=2 SV=1	283	36480.8	Q15417;	6	2	8.5	Oxidation (M)		0.99	1.98	0.99	0.99	0.99		1.397e-07	2.555e-07	8.493e-09	1.206e-07	1.307e-07	Control2 Only	Control3 Only	Sample1 Only	Sample2 Only	Sample3 Only
A3KFL4	A3KFL4_HUMAN Exosome complex component RRP4 OS=Homo sapiens GN=EXOSC2 PE=2 SV=1	263	32840.2	Q13868;	9	3	14.4			2	2	1	2	2		3.791e-07	3.667e-07	1.39e-08	2.405e-07	2.455e-07	Control2 Only	Control3 Only	Sample1 Only	Sample2 Only	Sample3 Only
P22102	PUR2_HUMAN Trifunctional purine biosynthetic protein adenosine-3 OS=Homo sapiens GN=GART PE=1 SV=1	1010	107987		105	24	29	Carbamidomethyl (C),Oxidation (M)	5.98	35.88	21.93	4.97	17.92	17.89	9.793e-08	5.648e-07	4.064e-07	7.379e-08	3.18e-07	3.333e-07	5.76738	4.1499	0.753497	3.24722	3.40345
F6SBX2	F6SBX2_HUMAN Isoleucine--tRNA ligase, mitochondrial OS=Homo sapiens GN=IARS2 PE=2 SV=1	940	114007	Q9NSE4;	39	16	20.1	Carbamidomethyl (C),Oxidation (M)		11	11		11	6		1.589e-07	1.601e-07		1.237e-07	8.559e-08	Control2 Only	Control3 Only		Sample2 Only	Sample3 Only
P51659	DHB4_HUMAN Peroxisomal multifunctional enzyme type 2 OS=Homo sapiens GN=HSD17B4 PE=1 SV=3	736	79852.4		92	17	30.6	Oxidation (M)	13.85	14.84	24.77	11.88	11.87	13.85	3.031e-07	3.293e-07	6.625e-07	2.542e-07	2.588e-07	3.717e-07	1.08644	2.18575	0.838667	0.853844	1.22633
Q8WUM4	PDC6I_HUMAN Programmed cell death 6-interacting protein OS=Homo sapiens GN=PDCD6IP PE=1 SV=1	868	96963.6	Q8WUM4-2;	7	3	4.1			2	2		2	1		1.319e-08	1.847e-08		1.282e-08	6.584e-09	Control2 Only	Control3 Only		Sample2 Only	Sample3 Only
Q93034	CUL5_HUMAN Cullin-5 OS=Homo sapiens GN=CUL5 PE=1 SV=4	780	91113.5		776	57	62.2	Acetylation (Protein N-term),Carbamidomethyl (C),Gln->pyro-Glu (N-term Q),Oxidation (M)	98	164	158	79	130	148	5.25e-06	1.213e-05	1.388e-05	3.474e-06	8.062e-06	1.151e-05	2.31048	2.64381	0.661714	1.53562	2.19238
O14920	IKKB_HUMAN Inhibitor of nuclear factor kappa-B kinase subunit beta OS=Homo sapiens GN=IKBKB PE=1 SV=1	756	86725		6	2	3.2	Oxidation (M)		1.98	1.98		0.99	0.99		1.687e-08	1.95e-08		1.055e-08	1.183e-08	Control2 Only	Control3 Only		Sample2 Only	Sample3 Only
B4DLC0	B4DLC0_HUMAN Poly(rC)-binding protein 2 OS=Homo sapiens GN=PCBP2 PE=2 SV=1	301	38234.4	B4DXP5;F8VXH9;F8VZX2;F8W0G4;G3V0E8;H3BRU6;Q15366;Q15366-2;Q15366-3;Q15366-4;Q15366-5;Q15366-6;	9	4	36.7	Carbamidomethyl (C),Oxidation (M)	0.99	0.99	1.98	1.98	0.99	1.98	5.603e-08	1.266e-07	1.817e-07	5.181e-08	6.84e-08	1.218e-07	2.2595	3.24291	0.924683	1.22077	2.17384
E9PB18	E9PB18_HUMAN UPF0577 protein KIAA1324 (Fragment) OS=Homo sapiens GN=KIAA1324 PE=2 SV=1	901	110633	Q6UXG2;Q6UXG2-2;Q6UXG2-3;Q6UXG2-4;	7	4	4.6	Carbamidomethyl (C)		2	2		2	1		2.175e-08	1.984e-08		1.112e-08	1.465e-08	Control2 Only	Control3 Only		Sample2 Only	Sample3 Only
F5H6X6	F5H6X6_HUMAN Neutral alpha-glucosidase AB OS=Homo sapiens GN=GANAB PE=2 SV=1	847	107077	Q14697;	23	9	12		1	8.98	4.99	1	2.99	3.98	1.39e-08	7.905e-08	5.571e-08	1.273e-08	2.552e-08	5.816e-08	5.68705	4.00791	0.915827	1.83597	4.18417
F5H335	F5H335_HUMAN Eukaryotic translation initiation factor 3 subunit A OS=Homo sapiens GN=EIF3A PE=2 SV=1	1348	166883	Q14152;	7	2	2			1	2		2	2		3.356e-09	4.322e-09		5.682e-09	7.249e-09	Control2 Only	Control3 Only		Sample2 Only	Sample3 Only
Q9NYU2	UGGG1_HUMAN UDP-glucose:glycoprotein glucosyltransferase 1 OS=Homo sapiens GN=UGGT1 PE=1 SV=3	1555	175317	Q9NYU2-2;	268	44	33.1	Carbamidomethyl (C),Oxidation (M)	47.97	63.97	45.99	36.98	41.97	32.98	2.424e-07	4.962e-07	2.836e-07	1.346e-07	3.444e-07	2.206e-07	2.04703	1.16997	0.555281	1.42079	0.910066
C9JNW5	C9JNW5_HUMAN 60S ribosomal protein L24 OS=Homo sapiens GN=RPL24 PE=2 SV=1	150	17803.9	C9JXB8;P83731;	30	8	55.4	Carbamidomethyl (C)	9	2		11	4	5	1.214e-06	3.653e-07		1.079e-06	4.6e-07	7.09e-07	0.300906	Control1 Only	0.888797	0.378913	0.58402
E5RJ68	E5RJ68_HUMAN AP-3 complex subunit beta-1 OS=Homo sapiens GN=AP3B1 PE=2 SV=1	1045	121569	O00203;	21	5	4.9	Carbamidomethyl (C)	3	5	5	2	4	3	3.402e-08	1.136e-07	7.759e-08	1.305e-08	7.9e-08	5.632e-08	3.33921	2.28072	0.383598	2.32216	1.6555
B4DPJ8	B4DPJ8_HUMAN T-complex protein 1 subunit zeta OS=Homo sapiens GN=CCT6A PE=2 SV=1	500	58131.7	P40227;	49	13	30	Gln->pyro-Glu (N-term Q),Oxidation (M)	8.94	7.96	7.97	10.94	5.97	6.98	2.415e-07	7.836e-07	6.483e-07	2.521e-07	4.267e-07	4.839e-07	3.24472	2.68447	1.04389	1.76687	2.00373
O95486	SC24A_HUMAN Protein transport protein Sec24A OS=Homo sapiens GN=SEC24A PE=1 SV=2	1093	119998		11	5	6.6	Oxidation (M)		3	4		2	2		1.743e-08	3.22e-08		1.375e-08	1.754e-08	Control2 Only	Control3 Only		Sample2 Only	Sample3 Only
H0YFA4	H0YFA4_HUMAN Cysteine-rich protein 2 (Fragment) OS=Homo sapiens GN=CRIP2 PE=4 SV=1	192	30273.7	P52943;P52943-2;	21	3	34.9	Carbamidomethyl (C)	6	2	4	4	3	2	6.119e-07	2.451e-07	8.018e-07	3.952e-07	5.648e-07	1.971e-07	0.400556	1.31034	0.645857	0.923027	0.322111
B9A064	IGLL5_HUMAN Immunoglobulin lambda-like polypeptide 5 OS=Homo sapiens GN=IGLL5 PE=2 SV=2	214	23102.7		49	2	10.7	Carbamidomethyl (C)	5	11	9	5	12	7	1.3e-06	8.842e-06	6.628e-06	7.207e-07	6.7e-06	4.9e-06	6.80154	5.09846	0.554385	5.15385	3.76923
J3KR12	J3KR12_HUMAN Uncharacterized protein OS=Homo sapiens PE=4 SV=1	359	33705.7	Q96C36;	13	4	16.2	Acetylation (Protein N-term),Carbamidomethyl (C)	0.98	1.96	1.96	1.98	1.98	3.92	2.712e-08	1.909e-07	2.531e-07	7.645e-08	2.083e-07	4.043e-07	7.03909	9.3326	2.81895	7.68068	14.9078
Q86YV9	HPS6_HUMAN Hermansky-Pudlak syndrome 6 protein OS=Homo sapiens GN=HPS6 PE=1 SV=1	775	83138.9		6	3	2.8			1	1		2	2		3.697e-08	4.109e-08		5.861e-08	6.116e-08	Control2 Only	Control3 Only		Sample2 Only	Sample3 Only
P23526	SAHH_HUMAN Adenosylhomocysteinase OS=Homo sapiens GN=AHCY PE=1 SV=4	432	47811.3		77	14	31.5		11.99	12.99	14.99	9.99	13.99	11.99	4.389e-07	1.682e-06	1.634e-06	3.381e-07	1.132e-06	1.201e-06	3.83231	3.72294	0.770335	2.57918	2.73639
B1ANR0	B1ANR0_HUMAN Poly(A) binding protein, cytoplasmic 4 (Inducible form), isoform CRA_e OS=Homo sapiens GN=PABPC4 PE=2 SV=1	615	72525	Q13310;Q13310-2;Q13310-3;	61	12	21.5	Carbamidomethyl (C),Oxidation (M)	13.57	4.83	5.77	11.62	9.7	13.55	4.65e-07	2.809e-07	2.142e-07	3.765e-07	4.586e-07	5.4e-07	0.604086	0.460645	0.809677	0.986237	1.16129
P62195	PRS8_HUMAN 26S protease regulatory subunit 8 OS=Homo sapiens GN=PSMC5 PE=1 SV=1	406	45705.1		46	15	46.8	Acetylation (Protein N-term),Carbamidomethyl (C),Oxidation (M)	2.97	10.85	7.9	5.94	8.92	8.9	6.29e-08	8.479e-07	6.002e-07	1.142e-07	4.352e-07	5.063e-07	13.4801	9.54213	1.81558	6.91892	8.04928
J3KS22	J3KS22_HUMAN L-xylulose reductase (Fragment) OS=Homo sapiens GN=DCXR PE=2 SV=1	224	25968.6	J3QS36;Q7Z4W1;	21	4	18.8		6.98	1.99	2.99	3.98	2.99	1.99	5.745e-07	3.434e-07	6.304e-07	2.587e-07	5.093e-07	3.146e-07	0.597737	1.0973	0.450305	0.88651	0.547607
P46781	RS9_HUMAN 40S ribosomal protein S9 OS=Homo sapiens GN=RPS9 PE=1 SV=3	194	22631.6		55	14	53.1	Oxidation (M)	15.96	2	5	19.95	6.99	4.99	1.822e-06	2.466e-07	2.737e-07	1.785e-06	6.001e-07	8.909e-07	0.135346	0.15022	0.979693	0.329363	0.488968
CONT_K22E_HUMAN	Possible Contaminant K22E_HUMAN	645	66005.5		1802	79	95.7	Acetylation (Protein N-term),Carbamidomethyl (C),Oxidation (M)	135	170	179.5	123	141.5	154.5	9.305e-06	2.577e-05	2.91e-05	7.723e-06	2.069e-05	2.018e-05	2.76948	3.12735	0.829984	2.22354	2.16873
Q9Y2A7	NCKP1_HUMAN Nck-associated protein 1 OS=Homo sapiens GN=NCKAP1 PE=1 SV=1	1128	129757	Q9Y2A7-2;	20	9	8.2		1	5	6		4	5	7.176e-10	3.988e-08	6.438e-08		2.707e-08	4.107e-08	55.5741	89.7157	Control1 Only	37.723	57.2324
E9PEM5	E9PEM5_HUMAN Lipopolysaccharide-responsive and beige-like anchor protein OS=Homo sapiens GN=LRBA PE=2 SV=1	2575	318348	F5H1X8;P50851;P50851-2;	30	8	3.5	Carbamidomethyl (C),Gln->pyro-Glu (N-term Q)		8	8		6	8		3.335e-08	3.024e-08		1.703e-08	2.391e-08	Control2 Only	Control3 Only		Sample2 Only	Sample3 Only
B4DR63	B4DR63_HUMAN 26S protease regulatory subunit 4 OS=Homo sapiens GN=PSMC1 PE=2 SV=1	367	49279.8	P62191;	74	17	48	Oxidation (M)	9	13	14	7	16	16	5.026e-07	1.753e-06	2.121e-06	3.041e-07	1.362e-06	1.477e-06	3.48786	4.22006	0.605054	2.70991	2.93872
Q9NZL9	MAT2B_HUMAN Methionine adenosyltransferase 2 subunit beta OS=Homo sapiens GN=MAT2B PE=1 SV=1	334	34651.5	Q9NZL9-2;Q9NZL9-3;Q9NZL9-4;	10	2	9.7		1.98		1.98	1.98	1.98	1.98	7.457e-08		2.352e-07	4.869e-08	1.963e-07	2.089e-07	Control1 Only	3.15408	0.652944	2.63243	2.80139
F5H223	F5H223_HUMAN Dynactin subunit 2 OS=Homo sapiens GN=DCTN2 PE=2 SV=1	378	44554	F5H2S7;Q13561;Q13561-2;Q13561-3;	7	5	16.9		0.99		0.99	4.94			1.407e-08		4.538e-08	9.083e-08			Control1 Only	3.2253	6.45558	Control1 Only	Control1 Only
P30084	ECHM_HUMAN Enoyl-CoA hydratase, mitochondrial OS=Homo sapiens GN=ECHS1 PE=1 SV=4	290	31439.2		10	2	11.7		1	2	3		2	2	2.855e-08	2.842e-07	4.364e-07		2.625e-07	2.54e-07	9.95447	15.2855	Control1 Only	9.1944	8.89667
H0YJ97	H0YJ97_HUMAN Thyroid receptor-interacting protein 11 (Fragment) OS=Homo sapiens GN=TRIP11 PE=4 SV=1	1695	228023	Q15643;	6	2	1.5		3	1		1		1	5.394e-09	2.785e-09		2.522e-09		2.334e-09	0.516314	Control1 Only	0.467557	Control1 Only	0.432703
Q8TAA9	VANG1_HUMAN Vang-like protein 1 OS=Homo sapiens GN=VANGL1 PE=1 SV=1	524	59854.2	Q8TAA9-2;	22	9	20.7	Oxidation (M)		5	4		3	10		2.887e-07	2.456e-07		1.98e-07	5.734e-07	Control2 Only	Control3 Only		Sample2 Only	Sample3 Only
J3QRV5	J3QRV5_HUMAN Lethal(2) giant larvae protein homolog 2 OS=Homo sapiens GN=LLGL2 PE=2 SV=1	1019	113145	Q6P1M3;Q6P1M3-2;	26	8	9.3	Oxidation (M)		7.98	6.98	1	5	5		1.197e-07	1.015e-07	1.866e-08	6.01e-08	7.033e-08	Control2 Only	Control3 Only	Sample1 Only	Sample2 Only	Sample3 Only
Q9Y295	DRG1_HUMAN Developmentally-regulated GTP-binding protein 1 OS=Homo sapiens GN=DRG1 PE=1 SV=1	367	40624.9		148	16	56.4	Carbamidomethyl (C),Oxidation (M)	20	25	29	21	26	27	8.856e-07	6.253e-06	6.554e-06	7.605e-07	4.497e-06	4.852e-06	7.06075	7.40063	0.85874	5.07791	5.47877
Q13011	ECH1_HUMAN Delta(3,5)-Delta(2,4)-dienoyl-CoA isomerase, mitochondrial OS=Homo sapiens GN=ECH1 PE=1 SV=2	328	35883.4		81	13	40.9	Carbamidomethyl (C),Oxidation (M)	17.94	8.97	13.94	16.94	8.97	13.95	1.198e-06	1.585e-06	2.27e-06	9.223e-07	1.079e-06	1.661e-06	1.32304	1.89482	0.769866	0.900668	1.38648
F5H4B6	F5H4B6_HUMAN Aldehyde dehydrogenase family 16 member A1 OS=Homo sapiens GN=ALDH16A1 PE=2 SV=1	639	80083.2	F8WBH3;Q8IZ83;Q8IZ83-3;	6	4	10.5			1	1		2	3		1.182e-08	1.745e-08		1.901e-08	2.656e-08	Control2 Only	Control3 Only		Sample2 Only	Sample3 Only
P60709	ACTB_HUMAN Actin, cytoplasmic 1 OS=Homo sapiens GN=ACTB PE=1 SV=1	375	41817.8		767	39	88.8	Acetylation (Protein N-term),Carbamidomethyl (C),Carbamidomethyl (C) + Ammonia-loss (N-term C),Gln->pyro-Glu (N-term Q),Glu->pyro-Glu (N-term E),Oxidation (M)	147.16	100.64	82.84	226.25	96.73	117.46	0.000104	0.0001481	0.0001221	0.0002148	9.658e-05	0.0001615	1.42404	1.17404	2.06538	0.928654	1.55288
P16403	H12_HUMAN Histone H1.2 OS=Homo sapiens GN=HIST1H1C PE=1 SV=2	213	21405.8		27	21	52.1	Acetylation (Protein N-term)	10			15	1	1	2.67e-06			3.573e-06	1.017e-07	2.635e-08	Control1 Only	Control1 Only	1.3382	0.0380899	0.00986891
P42704	LPPRC_HUMAN Leucine-rich PPR motif-containing protein, mitochondrial OS=Homo sapiens GN=LRPPRC PE=1 SV=3	1394	158219		129	27	21.2	Carbamidomethyl (C),Oxidation (M)	16.91	25.89	30.85	17.9	14.94	21.89	1.393e-07	3.398e-07	4.054e-07	1.334e-07	1.923e-07	2.92e-07	2.43934	2.91027	0.957645	1.38047	2.0962
P13647	K2C5_HUMAN Keratin, type II cytoskeletal 5 OS=Homo sapiens GN=KRT5 PE=1 SV=3	590	62502.1		707	61	68.5	Carbamidomethyl (C),Gln->pyro-Glu (N-term Q),Oxidation (M)	74.67	113.47	144.38	81.65	159.29	131.41	1.851e-06	6.059e-06	8.407e-06	2.06e-06	1.288e-05	6.827e-06	3.27337	4.54187	1.11291	6.9584	3.68828
B4E1G1	B4E1G1_HUMAN Derlin-1 OS=Homo sapiens GN=DERL1 PE=2 SV=1	151	26459.5	Q9BUN8;Q9BUN8-2;	7	2	16.6		1.99		0.99	1.98	0.99	0.99	1.118e-07		1.311e-07	1.062e-07	1.426e-07	1.059e-07	Control1 Only	1.17263	0.949911	1.27549	0.947227
Q9Y5Y6	ST14_HUMAN Suppressor of tumorigenicity 14 protein OS=Homo sapiens GN=ST14 PE=1 SV=2	855	94960.9		9	3	4.9		2	1	2	2	1	1	2.986e-08	7.361e-08	6.719e-08	2.751e-08	4.3e-08	4.407e-08	2.46517	2.25017	0.921299	1.44005	1.47589
P37108	SRP14_HUMAN Signal recognition particle 14 kDa protein OS=Homo sapiens GN=SRP14 PE=1 SV=2	136	14596.8		15	5	41.2		6	1	2	4	1	1	5.611e-07	1.794e-07	2.835e-07	3.533e-07	1.411e-07	2.258e-07	0.319729	0.505258	0.629656	0.25147	0.402424
P01876	IGHA1_HUMAN Ig alpha-1 chain C region OS=Homo sapiens GN=IGHA1 PE=1 SV=2	353	37720.7		40	8	24.4	Carbamidomethyl (C)	8	5	9	9	3	6	3.685e-07	5.199e-07	5.319e-07	3.461e-07	2.393e-07	4.24e-07	1.41085	1.44342	0.939213	0.649389	1.15061
B4DZI8	B4DZI8_HUMAN Coatomer protein complex, subunit beta 2 (Beta prime), isoform CRA_b OS=Homo sapiens GN=COPB2 PE=2 SV=1	877	102693	P35606;	18	8	10.5		1	3.99	4.99	1	1	5.99	2.44e-09	5.136e-08	7.01e-08	4.484e-09	3.681e-09	7.465e-08	21.0492	28.7295	1.8377	1.50861	30.5943
Q02878	RL6_HUMAN 60S ribosomal protein L6 OS=Homo sapiens GN=RPL6 PE=1 SV=3	288	32779.7		40	12	45.5	Gln->pyro-Glu (N-term Q)	14.45	0.99	0.99	13.95	2.97	4.95	1.308e-06	2.074e-08	3.923e-08	1.422e-06	2.165e-07	2.755e-07	0.0158563	0.0299924	1.08716	0.16552	0.210627
Q6PI48	SYDM_HUMAN Aspartate--tRNA ligase, mitochondrial OS=Homo sapiens GN=DARS2 PE=1 SV=1	645	73696.2		2	2	2.6		1		1	1			9.025e-09		8.52e-09	1.068e-08			Control1 Only	0.944044	1.18338	Control1 Only	Control1 Only
B0FLL2	B0FLL2_HUMAN 6-phosphofructo-2-kinase/fructose-2, 6-bisphosphatase 2 transcript variant 3 OS=Homo sapiens GN=PFKFB2 PE=2 SV=1	472	54497.7	O60825;O60825-2;	4	8	18.7		0.99		1.98			0.99	1.229e-08		6.877e-08			5.329e-08	Control1 Only	5.59561	Control1 Only	Control1 Only	4.33605
P23396	RS3_HUMAN 40S ribosomal protein S3 OS=Homo sapiens GN=RPS3 PE=1 SV=2	243	26743.5		85	20	81.9	Carbamidomethyl (C),Oxidation (M)	27.33	2.91	4.86	31.22	6.82	9.72	2.295e-06	3.873e-07	4.651e-07	2.15e-06	8.522e-07	1.305e-06	0.168758	0.202658	0.936819	0.371329	0.568627
Q08257	QOR_HUMAN Quinone oxidoreductase OS=Homo sapiens GN=CRYZ PE=1 SV=1	329	35274.6		27	9	35	Oxidation (M)	4.95	3.95	4.94	4.95	1.97	5.93	1.577e-07	2.315e-07	4.166e-07	1.104e-07	1.102e-07	3.478e-07	1.46798	2.64172	0.700063	0.698795	2.20545
P35998	PRS7_HUMAN 26S protease regulatory subunit 7 OS=Homo sapiens GN=PSMC2 PE=1 SV=3	433	48729.2		76	17	41.8	Carbamidomethyl (C),Oxidation (M)	9	11	13	8	17	18	2.291e-07	8.84e-07	1.065e-06	2.418e-07	1.444e-06	1.321e-06	3.85858	4.64863	1.05543	6.30292	5.76604
P48735	IDHP_HUMAN Isocitrate dehydrogenase [NADP], mitochondrial OS=Homo sapiens GN=IDH2 PE=1 SV=2	452	51002.9		220	22	53.3	Carbamidomethyl (C),Oxidation (M)	38.68	40.7	35.71	31.73	34.73	36.73	1.776e-06	5.454e-06	5.043e-06	1.322e-06	3.674e-06	4.183e-06	3.07095	2.83953	0.744369	2.06869	2.35529
J3KR24	J3KR24_HUMAN Isoleucine--tRNA ligase, cytoplasmic OS=Homo sapiens GN=IARS PE=2 SV=1	1152	144784	P41252;	237	31	31.9	Carbamidomethyl (C),Oxidation (M)	28.97	56.92	52.9	23.99	40.95	32.95	2.022e-07	7.862e-07	6.218e-07	1.631e-07	5.183e-07	4.74e-07	3.88823	3.07517	0.806627	2.5633	2.34421
P00338	LDHA_HUMAN L-lactate dehydrogenase A chain OS=Homo sapiens GN=LDHA PE=1 SV=2	332	36755.4		216	26	67.2	Acetylation (Protein N-term),Carbamidomethyl (C),Gln->pyro-Glu (N-term Q),Oxidation (M)	18.53	43.9	46.72	16.62	44.81	39.98	1.443e-06	2.119e-05	2.005e-05	1.137e-06	1.577e-05	1.576e-05	14.6847	13.8947	0.787942	10.9286	10.9217
P54803	GALC_HUMAN Galactocerebrosidase OS=Homo sapiens GN=GALC PE=1 SV=2	685	77182.8		263	20	35.8	Carbamidomethyl (C),Carbamidomethyl (C) + Ammonia-loss (N-term C),Oxidation (M)	34.37	52.01	46.14	32.39	46.11	48.08	1.331e-06	6.912e-06	5.817e-06	1.004e-06	4.816e-06	4.738e-06	5.19309	4.3704	0.75432	3.61833	3.55973
P35527	K1C9_HUMAN Keratin, type I cytoskeletal 9 OS=Homo sapiens GN=KRT9 PE=1 SV=3	623	62206.9		2439	61	87.8	Carbamidomethyl (C),Gln->pyro-Glu (N-term Q),Glu->pyro-Glu (N-term E),Oxidation (M)	381.26	394.26	432.91	382.28	479.59	351.46	3.326e-05	5.986e-05	7.88e-05	3.39e-05	0.0001404	4.409e-05	1.79976	2.36921	1.01924	4.22129	1.32562
P60866	RS20_HUMAN 40S ribosomal protein S20 OS=Homo sapiens GN=RPS20 PE=1 SV=1	119	16031.5	P60866-2;	17	4	30.3	Carbamidomethyl (C)	8.91		0.99	5.94	0.99		1.174e-06		3.302e-07	8.667e-07	2.098e-07		Control1 Only	0.281261	0.738245	0.178705	Control1 Only
P50416	CPT1A_HUMAN Carnitine O-palmitoyltransferase 1, liver isoform OS=Homo sapiens GN=CPT1A PE=1 SV=2	773	88526.9		233	30	42.6	Acetylation (Protein N-term),Carbamidomethyl (C),Oxidation (M)	24.93	53.82	52.82	17.94	40.89	43.85	5.297e-07	1.385e-06	1.586e-06	3.888e-07	9.879e-07	1.192e-06	2.61469	2.99415	0.734	1.86502	2.25033
CONT_BGAL_ECOLI	Possible Contaminant BGAL_ECOLI	1024	116715		8	4	4.9			2	2		2	3		1.13e-08	8.287e-09		1.024e-08	2.004e-08	Control2 Only	Control3 Only		Sample2 Only	Sample3 Only
F5H2U1	F5H2U1_HUMAN Cystathionine beta-synthase OS=Homo sapiens GN=CBS PE=2 SV=1	463	61985.8	H7C2H4;P35520;P35520-2;	4	2	7.6			0.99			1.99	1		9.806e-08			1.218e-07	2.263e-08	Control2 Only			Sample2 Only	Sample3 Only
P52292	IMA1_HUMAN Importin subunit alpha-1 OS=Homo sapiens GN=KPNA2 PE=1 SV=1	529	57970		23	6	17.2		6	4	2	6	3	2	2.831e-07	2.828e-07	1.626e-07	2.193e-07	1.53e-07	1.444e-07	0.99894	0.574355	0.774638	0.540445	0.510067
E9PC74	E9PC74_HUMAN Translation initiation factor eIF-2B subunit epsilon OS=Homo sapiens GN=EIF2B5 PE=2 SV=1	705	80545.4	Q13144;	3	2	3.1				1		1	0.99			2.356e-08		1.319e-08	2.185e-09		Control3 Only		Sample2 Only	Sample3 Only
P14649	MYL6B_HUMAN Myosin light chain 6B OS=Homo sapiens GN=MYL6B PE=1 SV=1	208	22803.7		38	5	23.6	Carbamidomethyl (C),Oxidation (M)	10.67	2.91	2.91	12.67	3.88	3.88	6.587e-06	1.141e-06	8.822e-07	9.426e-06	9.626e-07	1.04e-06	0.17322	0.13393	1.431	0.146136	0.157887
B4E2S7	B4E2S7_HUMAN Lysosome-associated membrane glycoprotein 2 OS=Homo sapiens GN=LAMP2 PE=2 SV=1	363	45249.5	B7Z2R9;P13473;P13473-2;P13473-3;	12	2	5		1	3	3	1	1	3	2.69e-08	1.442e-07	1.061e-07	2.209e-08	5.31e-08	1.17e-07	5.36059	3.94424	0.82119	1.97398	4.34944
Q6KB66	K2C80_HUMAN Keratin, type II cytoskeletal 80 OS=Homo sapiens GN=KRT80 PE=1 SV=2	452	47338.1	Q6KB66-2;	14	15	32.2	Oxidation (M)	4		1	4	5		1.081e-07		9.06e-09	8.713e-08	8.319e-08		Control1 Only	0.0838113	0.806013	0.769565	Control1 Only
F6TQG2	F6TQG2_HUMAN Probable global transcription activator SNF2L1 (Fragment) OS=Homo sapiens GN=SMARCA1 PE=2 SV=1	1005	121372	P28370;P28370-2;	20	5	4.5	Oxidation (M)	5			4.5	0.5	0.5	4.372e-08			2.525e-08	1.132e-09	2.911e-09	Control1 Only	Control1 Only	0.577539	0.025892	0.0665828
P45880	VDAC2_HUMAN Voltage-dependent anion-selective channel protein 2 OS=Homo sapiens GN=VDAC2 PE=1 SV=2	294	30465.1	P45880-1;P45880-2;	41	10	43.1	Carbamidomethyl (C)	19.78		1.98	16.82	0.98	0.99	1.515e-06		2.023e-07	1.163e-06	4.191e-08	4.647e-08	Control1 Only	0.133531	0.767657	0.0276634	0.0306733
P36542	ATPG_HUMAN ATP synthase subunit gamma, mitochondrial OS=Homo sapiens GN=ATP5C1 PE=1 SV=1	298	33047.3		114	14	52	Carbamidomethyl (C),Oxidation (M)	15	23	19	20	18	19	1.403e-06	5.721e-06	5.175e-06	1.282e-06	4.252e-06	3.753e-06	4.07769	3.68852	0.913756	3.03065	2.67498
P43686	PRS6B_HUMAN 26S protease regulatory subunit 6B OS=Homo sapiens GN=PSMC4 PE=1 SV=2	418	47444.6		53	14	40	Oxidation (M)	7	9	13	6	7	11	3.853e-07	1.177e-06	1.457e-06	2.688e-07	9.227e-07	1.03e-06	3.05476	3.78147	0.697638	2.39476	2.67324
P55072	TERA_HUMAN Transitional endoplasmic reticulum ATPase OS=Homo sapiens GN=VCP PE=1 SV=4	806	89499.9		32	12	13.4			9.99	8	2	6	6		1.247e-07	1.06e-07	1.417e-08	5.898e-08	8.747e-08	Control2 Only	Control3 Only	Sample1 Only	Sample2 Only	Sample3 Only
O60547	GMDS_HUMAN GDP-mannose 4,6 dehydratase OS=Homo sapiens GN=GMDS PE=1 SV=1	372	42031.3		26	9	30.4	Carbamidomethyl (C),Oxidation (M)	4	6	4	2	4	6	1.475e-07	4.817e-07	2.931e-07	4.707e-08	2.421e-07	3.737e-07	3.26576	1.98712	0.319119	1.64136	2.53356
P08779	K1C16_HUMAN Keratin, type I cytoskeletal 16 OS=Homo sapiens GN=KRT16 PE=1 SV=4	473	51362.3		312	43	70.4	Carbamidomethyl (C),Gln->pyro-Glu (N-term Q),Oxidation (M)	19	30	87	44	86	47	3.971e-07	1.571e-06	5.494e-06	1.081e-06	6.581e-06	2.199e-06	3.95618	13.8353	2.72224	16.5727	5.53765
Q9H479	FN3K_HUMAN Fructosamine-3-kinase OS=Homo sapiens GN=FN3K PE=1 SV=1	309	35238.9		19	7	23.3		1	3	6	3	2	4	2.977e-08	3.493e-07	4.991e-07	1.008e-07	2.015e-07	3.281e-07	11.7333	16.7652	3.38596	6.76856	11.0212
P32119	PRDX2_HUMAN Peroxiredoxin-2 OS=Homo sapiens GN=PRDX2 PE=1 SV=5	198	21932.3		128	12	46	Gln->pyro-Glu (N-term Q)	16.46	17.97	18.47	13.5	20.46	17.98	3.052e-06	9.59e-06	9.195e-06	1.627e-06	8.021e-06	7.088e-06	3.1422	3.01278	0.533093	2.62811	2.32241
O60264	SMCA5_HUMAN SWI/SNF-related matrix-associated actin-dependent regulator of chromatin subfamily A member 5 OS=Homo sapiens GN=SMARCA5 PE=1 SV=1	1052	122135		27	10	10.6	Carbamidomethyl (C),Oxidation (M)	9			7.5	0.5	0.5	1.156e-07			7.612e-08	1.082e-09	2.781e-09	Control1 Only	Control1 Only	0.658478	0.00935986	0.0240571
Q9NZT2	OGFR_HUMAN Opioid growth factor receptor OS=Homo sapiens GN=OGFR PE=1 SV=3	677	71560.4	Q9NZT2-2;	345	27	51.8	Carbamidomethyl (C),Gln->pyro-Glu (N-term Q),Oxidation (M)	47.99	59.98	62.97	48.99	58.98	65.96	2.007e-06	5.19e-06	5.478e-06	1.69e-06	3.721e-06	4.217e-06	2.58595	2.72945	0.842053	1.85401	2.10115
P62854	RS26_HUMAN 40S ribosomal protein S26 OS=Homo sapiens GN=RPS26 PE=1 SV=3	115	13025.1		11	3	27		5			5	1		1.904e-06			1.362e-06	3.068e-08		Control1 Only	Control1 Only	0.715336	0.0161134	Control1 Only
CONT_CATD_HUMAN	Possible Contaminant CATD_HUMAN	412	44631.7	P07339;	470	18	43.7	Carbamidomethyl (C),Gln->pyro-Glu (N-term Q),Oxidation (M)	86.6	65.91	79.68	84.61	75.79	69.86	2.406e-05	5.814e-05	5.646e-05	1.742e-05	4.702e-05	4.53e-05	2.41646	2.34663	0.724023	1.95428	1.88279
H3BMW1	H3BMW1_HUMAN Cytosolic Fe-S cluster assembly factor NUBP2 (Fragment) OS=Homo sapiens GN=NUBP2 PE=2 SV=1	139	28878.9	H3BNF0;H3BNS4;H3BRK5;Q9Y5Y2;	7	2	45.7		1		2	2	1	1	8.207e-08		4.666e-07	1.432e-07	1.505e-07	9.775e-08	Control1 Only	5.68539	1.74485	1.8338	1.19106
O94952	FBX21_HUMAN F-box only protein 21 OS=Homo sapiens GN=FBXO21 PE=2 SV=2	628	71613.2	O94952-1;	78	8	16.6	Gln->pyro-Glu (N-term Q),Oxidation (M)	5.98	14.96	17.94	4.97	14.95	19.91	1.621e-07	8.547e-07	7.506e-07	9.662e-08	5.159e-07	6.808e-07	5.27267	4.63048	0.596052	3.1826	4.19988
Q9Y265	RUVB1_HUMAN RuvB-like 1 OS=Homo sapiens GN=RUVBL1 PE=1 SV=1	456	50322.4		113	18	47.1	Carbamidomethyl (C),Oxidation (M)	24.75	16.85	19.82	18.85	13.87	18.83	1.233e-06	1.754e-06	2.042e-06	6.609e-07	1.351e-06	1.744e-06	1.42255	1.65612	0.53601	1.0957	1.41444
P16615	AT2A2_HUMAN Sarcoplasmic/endoplasmic reticulum calcium ATPase 2 OS=Homo sapiens GN=ATP2A2 PE=1 SV=1	1042	109951	P16615-2;P16615-3;P16615-5;	191	26	27.6	Acetylation (Protein N-term),Carbamidomethyl (C),Oxidation (M)	16.83	40.6	40.59	14.86	39.63	36.63	1.989e-07	7.919e-07	8.336e-07	1.453e-07	5.777e-07	6.137e-07	3.9814	4.19105	0.730518	2.90447	3.08547
P48047	ATPO_HUMAN ATP synthase subunit O, mitochondrial OS=Homo sapiens GN=ATP5O PE=1 SV=1	213	23316.7		35	8	44.6		4	3	5	7.99	7.99	6.99	2.84e-07	6.731e-07	7.81e-07	4.578e-07	1.071e-06	8.26e-07	2.37007	2.75	1.61197	3.77113	2.90845
Q08554	DSC1_HUMAN Desmocollin-1 OS=Homo sapiens GN=DSC1 PE=1 SV=2	894	94010.2	Q08554-2;	20	5	6.7	Gln->pyro-Glu (N-term Q),Oxidation (M)	1	3	3	3	9	1	6.015e-09	4.085e-08	4.233e-08	1.758e-08	1.023e-07	9.361e-09	6.79135	7.03741	2.92269	17.0075	1.55628
Q53FA7	QORX_HUMAN Quinone oxidoreductase PIG3 OS=Homo sapiens GN=TP53I3 PE=1 SV=2	332	35603.6		67	9	31.3	Acetylation (Protein N-term),Oxidation (M)	10.95	11.94	8.96	15.92	7.96	10.95	4.865e-07	1.849e-06	1.806e-06	5.616e-07	1.057e-06	1.469e-06	3.80062	3.71223	1.15437	2.17266	3.01953
B5MCQ5	B5MCQ5_HUMAN Protein disulfide-isomerase A6 OS=Homo sapiens GN=PDIA6 PE=2 SV=1	488	54011.2	B7Z254;F8WA83;Q15084;Q15084-2;	19	6	16.5		3	3	5	2	2	4	1.466e-07	2.978e-07	3.749e-07	8.585e-08	2.076e-07	2.982e-07	2.03138	2.5573	0.585607	1.4161	2.03411
Q9HB71	CYBP_HUMAN Calcyclin-binding protein OS=Homo sapiens GN=CACYBP PE=1 SV=2	228	21268.9	Q9HB71-3;	4	3	17.8	Carbamidomethyl (C)	2			1		1	5.931e-08			1.453e-08		7.193e-08	Control1 Only	Control1 Only	0.244984	Control1 Only	1.21278
P39023	RL3_HUMAN 60S ribosomal protein L3 OS=Homo sapiens GN=RPL3 PE=1 SV=2	403	46187.8		45	12	34.2	Oxidation (M)	11.86	1.98	3.96	17.78	3.96	4.95	5.492e-07	2.252e-08	1.214e-07	7.078e-07	8.969e-08	1.506e-07	0.0410051	0.221049	1.28878	0.16331	0.274217
P14625	ENPL_HUMAN Endoplasmin OS=Homo sapiens GN=HSP90B1 PE=1 SV=1	803	92645.5		48	14	21		5	12	9	5	10	7	1.141e-07	3.192e-07	2.294e-07	1.18e-07	1.859e-07	1.745e-07	2.79755	2.01052	1.03418	1.62927	1.52936
E7ESK6	E7ESK6_HUMAN Syndecan OS=Homo sapiens GN=SDC2 PE=2 SV=1	165	22200.2	E9PBI9;P34741;	32	4	19.4	Oxidation (M)	12	1	1	13	1	4	5.993e-07	2.442e-08	3.304e-08	6.389e-07	6.021e-08	1.993e-07	0.0407475	0.055131	1.06608	0.100467	0.332555
E7EMH5	E7EMH5_HUMAN Pyridoxal-dependent decarboxylase domain-containing protein 1 OS=Homo sapiens GN=PDXDC1 PE=2 SV=1	697	86886.4	E7EPL4;H3BND4;H3BNZ1;J3KNK7;Q6P996;	18	7	12.1	Carbamidomethyl (C),Oxidation (M)	3	2	3	1	5	3.99	4.225e-08	6.978e-08	1.114e-07	1.031e-08	1.87e-07	1.151e-07	1.6516	2.63669	0.244024	4.42604	2.72426
Q15075	EEA1_HUMAN Early endosome antigen 1 OS=Homo sapiens GN=EEA1 PE=1 SV=2	1411	162781		14	9	7.5		2	2	5		3	2	3.826e-09	6.574e-09	1.424e-08		1.343e-08	2.766e-09	1.71824	3.7219	Control1 Only	3.51019	0.722948
P07814	SYEP_HUMAN Bifunctional glutamate/proline--tRNA ligase OS=Homo sapiens GN=EPRS PE=1 SV=5	1512	170933		370	47	36.7	Carbamidomethyl (C),Oxidation (M)	42	93	68	19	73	66	2.39e-07	9.199e-07	7.251e-07	9.768e-08	7.003e-07	5.986e-07	3.84895	3.03389	0.408703	2.93013	2.5046
P50502	F10A1_HUMAN Hsc70-interacting protein OS=Homo sapiens GN=ST13 PE=1 SV=2	369	41413.5		82	9	24.1	Gln->pyro-Glu (N-term Q),Oxidation (M)	18.86	7.95	15.91	18.87	9.93	9.95	1.482e-06	2.171e-06	2.957e-06	1.598e-06	1.5e-06	1.922e-06	1.46491	1.99528	1.07827	1.01215	1.2969
Q99523	SORT_HUMAN Sortilin OS=Homo sapiens GN=SORT1 PE=1 SV=3	831	92243.6		18	5	7.3	Carbamidomethyl (C)		5	5		5	3		1.235e-07	9.638e-08		8.406e-08	7.191e-08	Control2 Only	Control3 Only		Sample2 Only	Sample3 Only
Q53GQ0	DHB12_HUMAN Estradiol 17-beta-dehydrogenase 12 OS=Homo sapiens GN=HSD17B12 PE=1 SV=2	312	34392.2		53	13	46.5	Carbamidomethyl (C),Oxidation (M)	18.98	3.99	4.99	14.98	2.99	6.98	1.025e-06	3.97e-07	5.913e-07	6.915e-07	2.682e-07	5.43e-07	0.387317	0.576878	0.674634	0.261659	0.529756
R4GNH3	R4GNH3_HUMAN 26S protease regulatory subunit 6A OS=Homo sapiens GN=PSMC3 PE=3 SV=1	423	47448.6		96	17	50.6	Acetylation (Protein N-term),Oxidation (M)	10.8	18.63	16.66	9.8	17.64	18.59	5.083e-07	1.966e-06	1.728e-06	3.012e-07	1.476e-06	1.403e-06	3.86779	3.39957	0.592563	2.9038	2.76018
E9PJN0	E9PJN0_HUMAN Acyl-coenzyme A thioesterase 8 OS=Homo sapiens GN=ACOT8 PE=2 SV=1	226	35981.1	H7C5A7;O14734;	25	5	30.1		2	2	5	4	7	5	1.234e-07	3.347e-07	8.586e-07	1.922e-07	8.577e-07	7.167e-07	2.71232	6.95786	1.55754	6.95057	5.80794
Q15233	NONO_HUMAN Non-POU domain-containing octamer-binding protein OS=Homo sapiens GN=NONO PE=1 SV=4	471	43946.2	Q15233-2;	21	11	28.8	Carbamidomethyl (C),Oxidation (M)	3.95	1.97	5.92	3.96	0.98	3.95	7.484e-08	1.104e-07	4.429e-07	1.328e-07	5.724e-08	2.678e-07	1.47515	5.91796	1.77445	0.764832	3.5783
C9J1V9	C9J1V9_HUMAN HCG2043275 OS=Homo sapiens GN=hCG_2043275 PE=4 SV=2	151	15574.2	D6RBD7;O43324;O43324-2;	21	3	22.3	Acetylation (Protein N-term)	4.97	2.99	2.99	4.97	1.99	2.98	4.954e-07	4.163e-07	4.187e-07	3.365e-07	2.102e-07	4.394e-07	0.840331	0.845176	0.679249	0.424304	0.88696
P08107	HSP71_HUMAN Heat shock 70 kDa protein 1A/1B OS=Homo sapiens GN=HSPA1A PE=1 SV=5	641	70189.1		351	34	53.2	Carbamidomethyl (C),Oxidation (M)	35.64	57.42	79.25	29.68	67.35	78.25	1.739e-06	5.209e-06	6.056e-06	1.209e-06	3.706e-06	5.151e-06	2.9954	3.48246	0.695227	2.13111	2.96205
Q12933	TRAF2_HUMAN TNF receptor-associated factor 2 OS=Homo sapiens GN=TRAF2 PE=1 SV=2	501	53146.3	Q12933-2;Q12933-3;Q12933-4;	24	6	13.7	Carbamidomethyl (C),Oxidation (M)	2	5	5	3	4	6	2.433e-08	3.022e-07	2.735e-07	4.161e-08	1.706e-07	2.266e-07	12.4209	11.2413	1.71023	7.01192	9.3136
O43175	SERA_HUMAN D-3-phosphoglycerate dehydrogenase OS=Homo sapiens GN=PHGDH PE=1 SV=4	533	56758.5		92	13	27.8	Carbamidomethyl (C),Oxidation (M)	15.99	17.98	14.99	12.99	13.99	15.98	6.494e-07	1.706e-06	1.601e-06	3.842e-07	1.278e-06	1.349e-06	2.62704	2.46535	0.591623	1.96797	2.0773
Q9Y224	CN166_HUMAN UPF0568 protein C14orf166 OS=Homo sapiens GN=C14orf166 PE=1 SV=1	244	28122.7		20	6	29.5	Oxidation (M)	5.98	1	2.98	6.96	1	2.98	2.81e-07	1.684e-07	4.104e-07	2.186e-07	9.216e-08	3.244e-07	0.599288	1.4605	0.777936	0.327972	1.15445
Q8TEQ6	GEMI5_HUMAN Gem-associated protein 5 OS=Homo sapiens GN=GEMIN5 PE=1 SV=3	1508	168933		12	5	3.8		2	1	4	1	1	3	4.273e-09	4.224e-09	2.4e-08	1.034e-09	5.514e-09	1.576e-08	0.988533	5.61666	0.241985	1.29043	3.68828
O76071	CIAO1_HUMAN Probable cytosolic iron-sulfur protein assembly protein CIAO1 OS=Homo sapiens GN=CIAO1 PE=1 SV=1	339	37905.9		11	3	7.1		1	2	2		3	3	1.693e-08	1.415e-07	1.327e-07		2.081e-07	1.905e-07	8.35794	7.83816	Control1 Only	12.2918	11.2522
B4E2W0	B4E2W0_HUMAN 3-ketoacyl-CoA thiolase OS=Homo sapiens GN=HADHB PE=2 SV=1	452	51387.6	P55084;	28	7	15.7		2.96	4.94	5.93	3.95	3.95	5.93	1.731e-07	1.006e-06	1.06e-06	1.829e-07	6.357e-07	8.751e-07	5.81167	6.12363	1.05661	3.67244	5.05546
P13645	K1C10_HUMAN Keratin, type I cytoskeletal 10 OS=Homo sapiens GN=KRT10 PE=1 SV=6	584	58953.8		2396	53	68.7	Carbamidomethyl (C),Gln->pyro-Glu (N-term Q),Oxidation (M)	359.8	402.77	472.68	343.79	409.71	405.74	3.897e-05	0.0001063	0.0001299	3.086e-05	0.0001057	8.738e-05	2.72774	3.33333	0.791891	2.71234	2.24224
P02533	K1C14_HUMAN Keratin, type I cytoskeletal 14 OS=Homo sapiens GN=KRT14 PE=1 SV=4	472	51655.5		453	46	78.4	Carbamidomethyl (C),Gln->pyro-Glu (N-term Q),Oxidation (M)	55.5	68.5	84	50.5	89.5	66.5	1.666e-06	3.792e-06	5.815e-06	1.563e-06	9.379e-06	3.472e-06	2.27611	3.4904	0.938175	5.62965	2.08403
Q9H773	DCTP1_HUMAN dCTP pyrophosphatase 1 OS=Homo sapiens GN=DCTPP1 PE=1 SV=1	170	18705.4		80	13	62.4	Acetylation (Protein N-term),Carbamidomethyl (C),Carbamidomethyl (C) + Ammonia-loss (N-term C)	16	8.99	11.99	20.99	12.99	8.99	2.802e-06	3.334e-06	4.523e-06	2.443e-06	3.734e-06	2.105e-06	1.18986	1.6142	0.871877	1.33262	0.751249
O14880	MGST3_HUMAN Microsomal glutathione S-transferase 3 OS=Homo sapiens GN=MGST3 PE=1 SV=1	152	18440.6	Q5VV89;	8	2	18.4		3			4	1		3.644e-07			2.178e-07	4.787e-08		Control1 Only	Control1 Only	0.597695	0.131367	Control1 Only
F8W7C6	F8W7C6_HUMAN 60S ribosomal protein L10 OS=Homo sapiens GN=RPL10 PE=2 SV=1	163	24641.9	P27635;	31	9	42.9	Carbamidomethyl (C),Oxidation (M)	11.89			15.87	0.98	1.97	1.579e-06			1.933e-06	6.643e-09	1.461e-07	Control1 Only	Control1 Only	1.22419	0.00420709	0.0925269
O95197	RTN3_HUMAN Reticulon-3 OS=Homo sapiens GN=RTN3 PE=1 SV=2	1032	101032	O95197-2;O95197-3;O95197-4;O95197-7;	12	2	8.1		1	2	2	2	3	3	1.915e-08	7.871e-08	7.272e-08	2.018e-08	1.089e-07	1.053e-07	4.11018	3.79739	1.05379	5.68668	5.49869
P18124	RL7_HUMAN 60S ribosomal protein L7 OS=Homo sapiens GN=RPL7 PE=1 SV=1	248	29279.2		62	16	45.6	Oxidation (M)	23.95	1	4	21.93	4.99	5.99	2.461e-06	1.417e-07	4.027e-07	2.519e-06	6.356e-07	7.467e-07	0.0575782	0.163633	1.02357	0.258269	0.303413
P11142	HSP7C_HUMAN Heat shock cognate 71 kDa protein OS=Homo sapiens GN=HSPA8 PE=1 SV=1	646	71034.3		1216	52	76.6	Carbamidomethyl (C),Gln->pyro-Glu (N-term Q),Oxidation (M)	126.56	221.96	250.19	107.06	231.59	248.3	1.63e-05	4.438e-05	4.596e-05	9.916e-06	3.436e-05	4.214e-05	2.7227	2.81963	0.608344	2.10798	2.58528
Q15024	EXOS7_HUMAN Exosome complex component RRP42 OS=Homo sapiens GN=EXOSC7 PE=1 SV=3	291	31873.1		10	3	13.1		1	1	2	1	2	3	1.983e-08	1.122e-07	1.536e-07	1.408e-08	1.362e-07	2.358e-07	5.65809	7.74584	0.710035	6.86838	11.8911
Q9BPW8	NIPS1_HUMAN Protein NipSnap homolog 1 OS=Homo sapiens GN=NIPSNAP1 PE=1 SV=1	284	33360.9		87	13	48.2	Carbamidomethyl (C),Oxidation (M)	9.92	19.85	16.87	11.91	15.88	12.9	5.623e-07	4.272e-06	3.418e-06	6.399e-07	3.156e-06	2.64e-06	7.59737	6.07861	1.138	5.61266	4.695
P31689	DNJA1_HUMAN DnaJ homolog subfamily A member 1 OS=Homo sapiens GN=DNAJA1 PE=1 SV=2	397	37110.8	P31689-2;	5	2	6			0.99	0.99	1	0.99	0.99		9.434e-08	1.5e-07	2.183e-08	6.892e-08	8.838e-08	Control2 Only	Control3 Only	Sample1 Only	Sample2 Only	Sample3 Only
B4E0X2	B4E0X2_HUMAN RAF proto-oncogene serine/threonine-protein kinase OS=Homo sapiens GN=RAF1 PE=2 SV=1	567	75545.2	B4E1N6;H7C155;P04049;P04049-2;	3	4	9.9		1		1	1			6.994e-09		1.009e-08	1.141e-08			Control1 Only	1.44267	1.6314	Control1 Only	Control1 Only
P52907	CAZA1_HUMAN F-actin-capping protein subunit alpha-1 OS=Homo sapiens GN=CAPZA1 PE=1 SV=3	286	32974.4		95	13	58.4	Acetylation (Protein N-term),Carbamidomethyl (C)	15	15	14.5	14.5	14	15.5	8.768e-07	2.546e-06	2.756e-06	7.479e-07	1.926e-06	2.136e-06	2.90374	3.14325	0.852988	2.19662	2.43613
Q6ZRV2	FA83H_HUMAN Protein FAM83H OS=Homo sapiens GN=FAM83H PE=1 SV=3	1179	127386		51	17	21.3		27		1	19	3	1	2.778e-07		6.548e-09	1.814e-07	1.666e-08	1.214e-08	Control1 Only	0.0235709	0.652988	0.0599712	0.0437005
P68104	EF1A1_HUMAN Elongation factor 1-alpha 1 OS=Homo sapiens GN=EEF1A1 PE=1 SV=1	462	50279.2	Q5VTE0;	575	25	55.2	Carbamidomethyl (C),Gln->pyro-Glu (N-term Q),Glu->pyro-Glu (N-term E),Oxidation (M)	112.5	91.61	86.62	102.55	89.63	91.62	1.613e-05	3.792e-05	3.753e-05	1.257e-05	2.809e-05	3.365e-05	2.3509	2.32672	0.779293	1.74148	2.08617
F8W845	F8W845_HUMAN Catenin alpha-1 OS=Homo sapiens GN=CTNNA1 PE=2 SV=1	803	102841	G3XAM7;P35221;P35221-2;	28	8	11.5	Carbamidomethyl (C),Oxidation (M)	2.96	5.93	6.92	2.96	1.97	6.92	4.183e-08	6.61e-08	9.58e-08	4.073e-08	2.819e-08	8.055e-08	1.58021	2.29022	0.973703	0.673918	1.92565
Q6PJ69	TRI65_HUMAN Tripartite motif-containing protein 65 OS=Homo sapiens GN=TRIM65 PE=1 SV=3	517	57460.9		18	8	18		1.99	1.99	4.98	2.98	2.99	2.99	5.375e-08	1.487e-07	2.593e-07	7.579e-08	1.274e-07	1.415e-07	2.76651	4.82419	1.41005	2.37023	2.63256
Q9UBN7	HDAC6_HUMAN Histone deacetylase 6 OS=Homo sapiens GN=HDAC6 PE=1 SV=2	1215	131696		85	15	14.4	Acetylation (Protein N-term),Carbamidomethyl (C),Oxidation (M)	3.94	14.81	20.71	2.95	19.73	21.72	3.192e-08	1.954e-07	3.725e-07	3.36e-08	3.321e-07	4.267e-07	6.12155	11.6698	1.05263	10.4041	13.3678
I3L1P8	I3L1P8_HUMAN Mitochondrial 2-oxoglutarate/malate carrier protein (Fragment) OS=Homo sapiens GN=SLC25A11 PE=2 SV=1	296	34129.9	Q02978;	49	9	35.1	Acetylation (Protein N-term)	8	6	11	7	8	9	3.312e-07	7.415e-07	1.212e-06	2.284e-07	7.056e-07	8.226e-07	2.23883	3.65942	0.689614	2.13043	2.4837
P46977	STT3A_HUMAN Dolichyl-diphosphooligosaccharide--protein glycosyltransferase subunit STT3A OS=Homo sapiens GN=STT3A PE=1 SV=2	705	80675		12	4	5.2	Oxidation (M)	2	2	3	1	2	2	3.095e-08	4.687e-08	1.291e-07	1.27e-08	7.388e-08	6.572e-08	1.51438	4.17124	0.410339	2.38708	2.12342
Q00610	CLH1_HUMAN Clathrin heavy chain 1 OS=Homo sapiens GN=CLTC PE=1 SV=5	1675	188257	Q00610-2;	843	73	53	Carbamidomethyl (C),Gln->pyro-Glu (N-term Q),Oxidation (M)	147.33	169.31	159.34	123.47	96.56	142.42	1.301e-06	1.863e-06	1.619e-06	1.101e-06	1.036e-06	1.587e-06	1.43198	1.24443	0.846272	0.796311	1.21983
H0YNW5	H0YNW5_HUMAN Deoxyuridine 5'-triphosphate nucleotidohydrolase, mitochondrial OS=Homo sapiens GN=DUT PE=2 SV=1	167	17772.9	P33316;P33316-2;	74	7	51.2	Carbamidomethyl (C),Oxidation (M)	15.9	8.95	9.95	15.89	12.92	9.95	2.916e-06	3.67e-06	3.908e-06	2.155e-06	3.507e-06	2.631e-06	1.25857	1.34019	0.739026	1.20267	0.902263
P41240	CSK_HUMAN Tyrosine-protein kinase CSK OS=Homo sapiens GN=CSK PE=1 SV=1	450	50797.8		10	3	8.7			2	2		4	2		1.221e-07	1.103e-07		2.041e-07	1.07e-07	Control2 Only	Control3 Only		Sample2 Only	Sample3 Only
C9J9K3	C9J9K3_HUMAN 40S ribosomal protein SA (Fragment) OS=Homo sapiens GN=RPSA PE=2 SV=1	264	32905.5	P08865;	103	10	50.8	Acetylation (Protein N-term),Carbamidomethyl (C),Oxidation (M)	24.92	9.97	12.95	22.91	14.95	16.95	2.428e-06	3.229e-06	2.789e-06	2.265e-06	4.104e-06	4.274e-06	1.3299	1.14868	0.932867	1.69028	1.7603
Q9H4M9	EHD1_HUMAN EH domain-containing protein 1 OS=Homo sapiens GN=EHD1 PE=1 SV=2	534	60732.8		18	7	19.9	Oxidation (M)		4.93	4.95	2.97	3.96	1.98		2.259e-07	2.529e-07	4.217e-08	1.977e-07	1.2e-07	Control2 Only	Control3 Only	Sample1 Only	Sample2 Only	Sample3 Only
E5RHG8	E5RHG8_HUMAN Transcription elongation factor B polypeptide 1 (Fragment) OS=Homo sapiens GN=TCEB1 PE=2 SV=1	89	12483	Q15369;	56	8	83.1	Carbamidomethyl (C),Oxidation (M)	20.79	2.97	3.96	17.82	3.96	5.94	6.858e-06	1.442e-06	1.625e-06	3.714e-06	1.85e-06	2.314e-06	0.210265	0.23695	0.541557	0.269758	0.337416
Q14974	IMB1_HUMAN Importin subunit beta-1 OS=Homo sapiens GN=KPNB1 PE=1 SV=2	876	97360.2		215	21	29	Acetylation (Protein N-term),Carbamidomethyl (C),Oxidation (M)	28.85	41.78	41.77	30.83	34.8	36.79	9.574e-07	1.58e-06	1.539e-06	8.299e-07	1.19e-06	1.165e-06	1.6503	1.60748	0.866827	1.24295	1.21684
P46779	RL28_HUMAN 60S ribosomal protein L28 OS=Homo sapiens GN=RPL28 PE=1 SV=3	137	15773.7		43	13	64.2	Acetylation (Protein N-term),Carbamidomethyl (C),Oxidation (M)	19.83		0.99	20.83		1.98	2.957e-06		1.3e-07	2.257e-06		1.466e-07	Control1 Only	0.0439635	0.763274	Control1 Only	0.0495773
B4DWW1	B4DWW1_HUMAN ADP-ribosylation factor-like protein 1 OS=Homo sapiens GN=ARL1 PE=2 SV=1	164	20458.5	P40616;	39	5	44.5	Oxidation (M)	12.87	0.99	4.95	13.86	2.97	2.97	1.599e-06	1.392e-07	9.502e-07	1.003e-06	5.145e-07	5.749e-07	0.0870544	0.594246	0.627267	0.321764	0.359537
B4DKY1	B4DKY1_HUMAN Cysteine--tRNA ligase, cytoplasmic OS=Homo sapiens GN=CARS PE=2 SV=1	739	94812	P49589;P49589-2;P49589-3;	27	8	13.2			4.95	8.91		5.94	6.93		7.274e-08	1.696e-07		8.773e-08	9.366e-08	Control2 Only	Control3 Only		Sample2 Only	Sample3 Only
Q8TBX8	PI42C_HUMAN Phosphatidylinositol 5-phosphate 4-kinase type-2 gamma OS=Homo sapiens GN=PIP4K2C PE=1 SV=3	421	45133	Q8TBX8-3;	24	7	20.6		1.98	3.96	4.95	2.97	2.97	6.93	2.199e-08	1.758e-07	2.671e-07	6.898e-08	1.339e-07	4.062e-07	7.99454	12.1464	3.13688	6.08913	18.472
Q9UBV2	SE1L1_HUMAN Protein sel-1 homolog 1 OS=Homo sapiens GN=SEL1L PE=1 SV=3	794	88932.6		16	4	6.9			3	4	2	4	3		5.845e-08	6.348e-08	1.566e-08	4.163e-08	3.298e-08	Control2 Only	Control3 Only	Sample1 Only	Sample2 Only	Sample3 Only
G3V5T0	G3V5T0_HUMAN Maleylacetoacetate isomerase OS=Homo sapiens GN=GSTZ1 PE=2 SV=1	202	22649.8		137	12	55	Acetylation (Protein N-term),Carbamidomethyl (C),Oxidation (M)	24.57	22.56	22.62	23.53	22.56	21.59	3.83e-06	1.055e-05	9.7e-06	3.108e-06	7.983e-06	8.41e-06	2.75457	2.53264	0.811488	2.08433	2.19582
P61247	RS3A_HUMAN 40S ribosomal protein S3a OS=Homo sapiens GN=RPS3A PE=1 SV=2	264	29997.8		56	17	61.4	Carbamidomethyl (C),Oxidation (M)	20.37	0.98	0.96	23.28	2.91	5.82	9.378e-07	2.375e-07	1.318e-07	1.102e-06	2.077e-07	3.732e-07	0.253252	0.140542	1.17509	0.221476	0.397953
P00966	ASSY_HUMAN Argininosuccinate synthase OS=Homo sapiens GN=ASS1 PE=1 SV=2	412	46609		36	10	19.2		3	7	4	3	9	10	7.816e-08	9.343e-07	5.194e-07	6.448e-08	9.168e-07	9.806e-07	11.9537	6.64534	0.824974	11.7298	12.5461
P23258	TBG1_HUMAN Tubulin gamma-1 chain OS=Homo sapiens GN=TUBG1 PE=1 SV=2	451	51185.7	Q9NRH3;	18	5	10		2	2	4	3	3	5	9.237e-08	1.338e-07	3.778e-07	9.619e-08	2.582e-07	4.285e-07	1.44852	4.09007	1.04136	2.79528	4.63895
O15269	SPTC1_HUMAN Serine palmitoyltransferase 1 OS=Homo sapiens GN=SPTLC1 PE=1 SV=1	473	52836.5		72	16	38.5	Carbamidomethyl (C),Oxidation (M)	10	11	17	9	11	14	4.505e-07	1.57e-06	2.195e-06	3.476e-07	1.184e-06	1.808e-06	3.48502	4.87236	0.771587	2.62819	4.01332
Q00839	HNRPU_HUMAN Heterogeneous nuclear ribonucleoprotein U OS=Homo sapiens GN=HNRNPU PE=1 SV=6	825	89158.3	Q00839-2;	5	2	3.2		1	1	1			2	4.325e-08	5.682e-09	7.747e-09			4.095e-08	0.131376	0.179121	Control1 Only	Control1 Only	0.946821
C9J2Y9	C9J2Y9_HUMAN DNA-directed RNA polymerase OS=Homo sapiens GN=POLR2B PE=2 SV=2	1167	134153	C9J4M6;P30876;	10	5	5			3	1	1	3	2		1.609e-08	7.568e-09	3.686e-09	1.631e-08	1.285e-08	Control2 Only	Control3 Only	Sample1 Only	Sample2 Only	Sample3 Only
P12830	CADH1_HUMAN Cadherin-1 OS=Homo sapiens GN=CDH1 PE=1 SV=3	882	97648		17	5	8.7	Oxidation (M)	0.99	3.97	2.98	1.98	4.97	1.99	2.171e-08	6.752e-08	4.958e-08	2.539e-08	5.365e-08	2.469e-08	3.11009	2.28374	1.16951	2.47121	1.13726
F8VQE1	F8VQE1_HUMAN LIM domain and actin-binding protein 1 OS=Homo sapiens GN=LIMA1 PE=2 SV=1	598	51313.2	F8VRN8;F8VS07;Q9UHB6;Q9UHB6-2;Q9UHB6-3;	5	3	9.3			1	1	2		1		1.751e-08	2.312e-08	2.341e-08		6.211e-09	Control2 Only	Control3 Only	Sample1 Only		Sample3 Only
Q9BUH6	CI142_HUMAN Uncharacterized protein C9orf142 OS=Homo sapiens GN=C9orf142 PE=1 SV=2	204	21680		34	9	46.1	Carbamidomethyl (C)	6	5	4	10	4	5	6.747e-07	9.214e-07	9.419e-07	5.752e-07	6.568e-07	7.729e-07	1.36564	1.39603	0.852527	0.97347	1.14555
Q9ULE0	WWC3_HUMAN Protein WWC3 OS=Homo sapiens GN=WWC3 PE=1 SV=3	1092	122924		8	5	4.3		2	1	2	1		2	5.127e-09	1.071e-08	1.262e-08	6.106e-09		1.433e-08	2.08894	2.46148	1.19095	Control1 Only	2.79501
E9PJD9	E9PJD9_HUMAN 60S ribosomal protein L27a OS=Homo sapiens GN=RPL27A PE=2 SV=1	91	16587.1	E9PLL6;P46776;	7	2	23.1		2			3	1	1	1.234e-06			1.026e-06	2.483e-07	2.848e-07	Control1 Only	Control1 Only	0.831442	0.201216	0.230794
Q9NV79	PCMD2_HUMAN Protein-L-isoaspartate O-methyltransferase domain-containing protein 2 OS=Homo sapiens GN=PCMTD2 PE=2 SV=2	361	41154.1		211	16	39.3	Carbamidomethyl (C),Gln->pyro-Glu (N-term Q),Oxidation (M)	45.6	27.76	33.72	36.68	30.76	34.71	2.205e-06	5.029e-06	6.231e-06	1.542e-06	4.379e-06	5e-06	2.28073	2.82585	0.69932	1.98594	2.26757
P78527	PRKDC_HUMAN DNA-dependent protein kinase catalytic subunit OS=Homo sapiens GN=PRKDC PE=1 SV=3	4128	470013		196	47	12.9	Carbamidomethyl (C),Oxidation (M)	19	45.96	44.96	16	27.98	42.99	2.2e-08	9.872e-08	1.177e-07	1.92e-08	6.245e-08	9.979e-08	4.48727	5.35	0.872727	2.83864	4.53591
J3KNL6	J3KNL6_HUMAN Protein transport protein Sec16A OS=Homo sapiens GN=SEC16A PE=2 SV=1	2357	236255	O15027;O15027-5;	106	32	20.1	Oxidation (M)	58.96	1	1	42.97	1	1	2.674e-07	2.464e-09	7.573e-10	1.989e-07	1.801e-09	5.225e-09	0.00921466	0.00283209	0.743829	0.00673523	0.01954
P04792	HSPB1_HUMAN Heat shock protein beta-1 OS=Homo sapiens GN=HSPB1 PE=1 SV=2	205	22822.5		704	24	94.1	Gln->pyro-Glu (N-term Q),Oxidation (M)	111	119	118	138	117	104	5.439e-05	0.0001325	0.0001221	5.142e-05	0.0001123	9.762e-05	2.43611	2.2449	0.945394	2.06472	1.79482
O95822	DCMC_HUMAN Malonyl-CoA decarboxylase, mitochondrial OS=Homo sapiens GN=MLYCD PE=1 SV=3	493	51039.5	O95822-2;	34	9	24.9		2	7	9		8	8	5.504e-08	5.633e-07	7.139e-07		4.97e-07	5.473e-07	10.2344	12.9706	Control1 Only	9.0298	9.94368
Q9H4H8	FA83D_HUMAN Protein FAM83D OS=Homo sapiens GN=FAM83D PE=1 SV=3	585	62719.5	Q9H4H8-2;	22	8	17	Oxidation (M)	3	1	8	3	2	5	7.692e-08	4.444e-08	1.113e-07	6.513e-08	3.809e-08	7.369e-08	0.577743	1.44696	0.846724	0.49519	0.958008
Q96MG8	PCMD1_HUMAN Protein-L-isoaspartate O-methyltransferase domain-containing protein 1 OS=Homo sapiens GN=PCMTD1 PE=2 SV=2	357	40739.6		193	16	36.4	Carbamidomethyl (C),Oxidation (M)	41.79	24.86	32.85	33.85	25.88	32.83	3.323e-06	6.042e-06	8.787e-06	2.348e-06	5.293e-06	7.165e-06	1.81824	2.6443	0.70659	1.59284	2.15618
Q9H4L5	OSBL3_HUMAN Oxysterol-binding protein-related protein 3 OS=Homo sapiens GN=OSBPL3 PE=1 SV=1	887	97877.4	Q9H4L5-2;	4	3	4.4		0.99		0.99	0.99		0.99	3.605e-09		9.026e-09	3.577e-09		5.437e-09	Control1 Only	2.50374	0.992233	Control1 Only	1.50818
P55735	SEC13_HUMAN Protein SEC13 homolog OS=Homo sapiens GN=SEC13 PE=1 SV=3	322	35608.2		13	3	14.9	Acetylation (Protein N-term),Carbamidomethyl (C)	2.98	0.99	2.98	3.97	0.99	0.99	1.654e-07	1.017e-07	1.784e-07	1.651e-07	8.743e-08	9.164e-08	0.614873	1.0786	0.998186	0.528597	0.554051
O95573	ACSL3_HUMAN Long-chain-fatty-acid--CoA ligase 3 OS=Homo sapiens GN=ACSL3 PE=1 SV=3	720	80566.4		6	3	5.4			1	1		2	2		1.543e-08	1.062e-08		1.976e-08	1.542e-08	Control2 Only	Control3 Only		Sample2 Only	Sample3 Only
P08237	K6PF_HUMAN 6-phosphofructokinase, muscle type OS=Homo sapiens GN=PFKM PE=1 SV=2	780	85344.5		161	28	41.2	Acetylation (Protein N-term),Carbamidomethyl (C),Oxidation (M)	11.76	29.5	35.43	9.82	33.48	38.31	2.748e-07	8.851e-07	1.093e-06	1.832e-07	7.125e-07	8.898e-07	3.22089	3.97744	0.666667	2.59279	3.23799
D6RAN4	D6RAN4_HUMAN 60S ribosomal protein L9 (Fragment) OS=Homo sapiens GN=RPL9 PE=2 SV=1	182	21903.8	P32969;	27	7	34.6	Carbamidomethyl (C),Oxidation (M)	10.89			12.87	0.99	1.98	1.153e-06			1.185e-06	1.072e-07	1.566e-07	Control1 Only	Control1 Only	1.02775	0.0929748	0.13582
Q5VY93	Q5VY93_HUMAN Rho guanine nucleotide exchange factor 2 OS=Homo sapiens GN=ARHGEF2 PE=2 SV=1	987	108445	Q92974;Q92974-2;Q92974-3;	15	5	6.1		1	4	3	1	3	3	5.764e-09	3.412e-08	4.543e-08	5.899e-09	2.5e-08	3.342e-08	5.9195	7.88168	1.02342	4.33727	5.79806
Q6P2Q9	PRP8_HUMAN Pre-mRNA-processing-splicing factor 8 OS=Homo sapiens GN=PRPF8 PE=1 SV=2	2335	274111		119	53	24.6	Carbamidomethyl (C),Gln->pyro-Glu (N-term Q),Oxidation (M)	66			50		3	1.812e-07			1.353e-07		3.582e-09	Control1 Only	Control1 Only	0.746689	Control1 Only	0.0197682
F5GY37	F5GY37_HUMAN Prohibitin-2 OS=Homo sapiens GN=PHB2 PE=2 SV=1	267	33348	J3KPX7;Q99623;	17	7	30		3.97		2.98	2.98		6.95	1.068e-07		2.077e-07	5.727e-08		3.467e-07	Control1 Only	1.94476	0.536236	Control1 Only	3.24625
Q15031	SYLM_HUMAN Probable leucine--tRNA ligase, mitochondrial OS=Homo sapiens GN=LARS2 PE=1 SV=2	903	102181		8	3	3.4	Oxidation (M)		2	1		4	2		3.101e-08	1.611e-08		3.591e-08	2.658e-08	Control2 Only	Control3 Only		Sample2 Only	Sample3 Only
D6RAA6	D6RAA6_HUMAN Transmembrane protein 33 (Fragment) OS=Homo sapiens GN=TMEM33 PE=2 SV=1	222	28031.9	P57088;	13	2	9		2	1	1	4	3	2	2.568e-07	2.97e-07	2.651e-07	2.466e-07	4.258e-07	3.614e-07	1.15654	1.03232	0.96028	1.6581	1.40732
F5GZS6	F5GZS6_HUMAN 4F2 cell-surface antigen heavy chain OS=Homo sapiens GN=SLC3A2 PE=2 SV=1	599	71277.3	J3KPF3;P08195;P08195-2;P08195-3;P08195-4;	30	9	21.9		1	7.98	7.98		7.97	4.98	3.213e-08	2.082e-07	2.809e-07		2.289e-07	1.779e-07	6.47993	8.74261	Control1 Only	7.12418	5.53688
O95373	IPO7_HUMAN Importin-7 OS=Homo sapiens GN=IPO7 PE=1 SV=1	1038	119746		24	7	6.8	Acetylation (Protein N-term),Oxidation (M)	5	4	4	5	2	4	7.416e-08	5.283e-08	6.447e-08	6.725e-08	2.63e-08	5.369e-08	0.712379	0.869337	0.906823	0.354639	0.723975
Q96P70	IPO9_HUMAN Importin-9 OS=Homo sapiens GN=IPO9 PE=1 SV=3	1041	116195		35	8	11.8	Acetylation (Protein N-term)	6	6	8	6	3	7	7.157e-08	8.705e-08	1.116e-07	2.07e-07	4.496e-08	9.43e-08	1.21629	1.55931	2.89227	0.628196	1.31759
B7ZA04	B7ZA04_HUMAN Cytoplasmic dynein 1 intermediate chain 2 OS=Homo sapiens GN=DYNC1I2 PE=2 SV=1	630	68563.8	F8W8S0;Q13409;Q13409-2;Q13409-3;	31	8	17.5		2.98	3.99	8.92	2.96	6.93	4.96	6.301e-08	6.413e-08	2.102e-07	5.213e-08	1.069e-07	1.028e-07	1.01777	3.33598	0.827329	1.69656	1.63149
B3KSH1	B3KSH1_HUMAN Eukaryotic translation initiation factor 3 subunit F OS=Homo sapiens GN=EIF3F PE=2 SV=1	372	37630.2	O00303;	5	3	9.8		0.99	0.99	0.99		1.98		1.309e-08	7.405e-08	9.238e-08		1.384e-07		5.65699	7.0573	Control1 Only	10.573	Control1 Only
P40926	MDHM_HUMAN Malate dehydrogenase, mitochondrial OS=Homo sapiens GN=MDH2 PE=1 SV=3	338	35570.8		69	14	52.1	Carbamidomethyl (C),Oxidation (M)	11.92	11.93	9.94	12.92	16.9	4.98	4.384e-07	9.468e-07	8.976e-07	4.584e-07	9.786e-07	3.967e-07	2.15967	2.04745	1.04562	2.23221	0.904881
Q01813	K6PP_HUMAN 6-phosphofructokinase type C OS=Homo sapiens GN=PFKP PE=1 SV=2	784	85775.7		522	41	55	Acetylation (Protein N-term),Carbamidomethyl (C),Gln->pyro-Glu (N-term Q),Oxidation (M)	53.54	102.09	100.59	47.08	96.64	93.16	1.435e-06	4.355e-06	4.446e-06	1.137e-06	3.519e-06	3.745e-06	3.03484	3.09826	0.792334	2.45226	2.60976
Q15149-3	PLEC_HUMAN Isoform 3 of Plectin OS=Homo sapiens GN=PLEC	4570	519085		1809	382	71.2	Carbamidomethyl (C),Carbamidomethyl (C) + Ammonia-loss (N-term C),Gln->pyro-Glu (N-term Q),Oxidation (M)	852.29	16.83	30.69	755.25	32.67	107.89	3.998e-06	3.668e-08	5.139e-08	3.073e-06	6.017e-08	1.835e-07	0.00917459	0.0128539	0.768634	0.01505	0.0458979
Q13200	PSMD2_HUMAN 26S proteasome non-ATPase regulatory subunit 2 OS=Homo sapiens GN=PSMD2 PE=1 SV=3	908	100406		308	39	48.9	Acetylation (Protein N-term),Carbamidomethyl (C),Gln->pyro-Glu (N-term Q),Oxidation (M)	22.79	75.28	65.37	14.86	64.38	64.38	4.105e-07	2.158e-06	2.233e-06	2.41e-07	1.811e-06	1.846e-06	5.257	5.43971	0.587089	4.41169	4.49695
Q8TEM1	PO210_HUMAN Nuclear pore membrane glycoprotein 210 OS=Homo sapiens GN=NUP210 PE=1 SV=3	1887	205541		44	24	15.7	Oxidation (M)	23	1		20			7.476e-08	1.347e-09		5.762e-08			0.0180177	Control1 Only	0.770733	Control1 Only	Control1 Only
P06576	ATPB_HUMAN ATP synthase subunit beta, mitochondrial OS=Homo sapiens GN=ATP5B PE=1 SV=3	529	56668.7		260	23	59.4	Oxidation (M)	38.59	46.48	43.54	37.6	44.51	46.5	2.316e-06	8.47e-06	7.224e-06	1.808e-06	6.785e-06	6.302e-06	3.65717	3.11917	0.780656	2.92962	2.72107
Q5T196	Q5T196_HUMAN Fad1, flavin adenine dinucleotide synthetase, homolog (Yeast), isoform CRA_e OS=Homo sapiens GN=FLAD1 PE=2 SV=1	456	49293.1	Q8NFF5;Q8NFF5-2;Q8NFF5-3;	7	4	11.4		1	1	2	1	1	1	2.137e-08	5.12e-08	9.563e-08	1.625e-08	1.152e-07	8.425e-08	2.39588	4.47496	0.760412	5.39073	3.94244
Q9BSJ8	ESYT1_HUMAN Extended synaptotagmin-1 OS=Homo sapiens GN=ESYT1 PE=1 SV=1	1104	124250	Q9BSJ8-2;	13	7	10.7		1	4	2		3	3	6.986e-09	6.62e-08	2.962e-08		3.461e-08	4.396e-08	9.4761	4.23991	Control1 Only	4.95419	6.29259
Q15365	PCBP1_HUMAN Poly(rC)-binding protein 1 OS=Homo sapiens GN=PCBP1 PE=1 SV=2	356	37564		17	7	25.3	Acetylation (Protein N-term),Carbamidomethyl (C),Oxidation (M)	3	2	2.98	5	2	2	9.352e-08	1.446e-07	2.403e-07	1.308e-07	1.191e-07	1.266e-07	1.54619	2.5695	1.39863	1.27352	1.35372
Q15437	SC23B_HUMAN Protein transport protein Sec23B OS=Homo sapiens GN=SEC23B PE=1 SV=2	767	86639.6		108	25	40.8	Acetylation (Protein N-term),Carbamidomethyl (C),Oxidation (M)	5	18	32	3	25	25	1.028e-07	4.494e-07	9.388e-07	2.416e-08	5.141e-07	6.583e-07	4.3716	9.1323	0.235019	5.00097	6.4037
Q9BYN8	RT26_HUMAN 28S ribosomal protein S26, mitochondrial OS=Homo sapiens GN=MRPS26 PE=1 SV=1	205	24250.9		5	3	15.1		2			2		1	1.007e-07			4.085e-08		3.69e-08	Control1 Only	Control1 Only	0.40566	Control1 Only	0.366435
P49411	EFTU_HUMAN Elongation factor Tu, mitochondrial OS=Homo sapiens GN=TUFM PE=1 SV=2	452	49636.3		280	24	60.2	Carbamidomethyl (C),Gln->pyro-Glu (N-term Q),Oxidation (M)	40	46	51	46	47	51	2.769e-06	1.014e-05	1.054e-05	2.618e-06	7.99e-06	8.851e-06	3.66197	3.80643	0.945468	2.88552	3.19646
O43242	PSMD3_HUMAN 26S proteasome non-ATPase regulatory subunit 3 OS=Homo sapiens GN=PSMD3 PE=1 SV=2	534	61083.6		69	18	36.5	Oxidation (M)	3	12.98	13	2	18.98	18.99	6.695e-08	8.251e-07	7.827e-07	2.129e-08	1.179e-06	8.654e-07	12.3241	11.6908	0.317999	17.6102	12.9261
O15270	SPTC2_HUMAN Serine palmitoyltransferase 2 OS=Homo sapiens GN=SPTLC2 PE=1 SV=1	562	63046		26	8	20.8	Carbamidomethyl (C),Oxidation (M)	5	3	5	3	5	6	7.51e-08	1.338e-07	1.704e-07	3.452e-08	1.123e-07	1.522e-07	1.78162	2.26897	0.459654	1.49534	2.02663
B3KQ95	B3KQ95_HUMAN Squalene synthase OS=Homo sapiens GN=FDFT1 PE=2 SV=1	306	48192.3	B4DT56;B7Z1J3;E9PNM1;P37268;	29	6	22.5		4.95	2.97	3.96	5.94	3.96	6.93	2.188e-07	2.531e-07	3.153e-07	1.73e-07	3.43e-07	4.618e-07	1.15676	1.44104	0.790676	1.56764	2.1106
CONT_CATA_HUMAN	Possible Contaminant CATA_HUMAN	526	59862.8	P04040;	9	3	9.1			1	2	2	3	1		4.766e-08	5.464e-08	1.172e-08	6.047e-08	7.27e-09	Control2 Only	Control3 Only	Sample1 Only	Sample2 Only	Sample3 Only
Q9NTJ5	SAC1_HUMAN Phosphatidylinositide phosphatase SAC1 OS=Homo sapiens GN=SACM1L PE=1 SV=2	587	67086.1		4	3	4.3			0.99	0.99		1.98			2.984e-08	5.986e-08		6.897e-08		Control2 Only	Control3 Only		Sample2 Only
E7ENZ3	E7ENZ3_HUMAN T-complex protein 1 subunit epsilon OS=Homo sapiens GN=CCT5 PE=2 SV=1	486	59794.9	P48643;	25	11	25.9		7	2	3	7	2	4	3.31e-07	1.368e-07	4.116e-07	1.996e-07	1.815e-07	3.257e-07	0.413293	1.2435	0.603021	0.548338	0.983988
P05388	RLA0_HUMAN 60S acidic ribosomal protein P0 OS=Homo sapiens GN=RPLP0 PE=1 SV=1	317	34341.9		97	12	52.1	Carbamidomethyl (C),Oxidation (M)	23.34	9.68	10.7	27.23	11.66	12.63	2.152e-06	1.101e-06	1.376e-06	2.082e-06	1.554e-06	1.963e-06	0.511617	0.639405	0.967472	0.722119	0.912175
Q96RQ3	MCCA_HUMAN Methylcrotonoyl-CoA carboxylase subunit alpha, mitochondrial OS=Homo sapiens GN=MCCC1 PE=1 SV=3	725	80638.1		91	16	29.1	Oxidation (M)	2.95	19.7	22.64	3.95	18.69	21.64	7.434e-08	5.65e-07	5.787e-07	7.038e-08	4.278e-07	4.874e-07	7.60022	7.7845	0.946731	5.75464	6.55636
B7Z817	B7Z817_HUMAN Delta(24)-sterol reductase OS=Homo sapiens GN=DHCR24 PE=2 SV=1	475	60206.1	Q15392;	42	8	14.1	Carbamidomethyl (C)	2	8.97	9.97	3.99	7.98	8.98	4.705e-08	8.921e-07	1.001e-06	6.23e-08	7.661e-07	7.513e-07	18.9607	21.2752	1.32412	16.2827	15.9681
B9A067	B9A067_HUMAN Mitochondrial inner membrane protein OS=Homo sapiens GN=IMMT PE=2 SV=2	711	83713.4	Q16891;Q16891-2;Q16891-4;	138	44	65.7	Gln->pyro-Glu (N-term Q),Oxidation (M)	68.7	2.94	0.98	57.89	0.98	4.92	1.979e-06	7.677e-08	5.418e-08	1.653e-06	1.327e-08	6.431e-08	0.0387923	0.0273775	0.83527	0.00670541	0.0324962
Q96RS6	NUDC1_HUMAN NudC domain-containing protein 1 OS=Homo sapiens GN=NUDCD1 PE=1 SV=2	583	56722.4	Q96RS6-2;Q96RS6-3;	10	3	8.3		2	2	1	2	2	2	5.81e-08	7.189e-08	3.007e-08	4.632e-08	5.167e-08	1.028e-07	1.23735	0.517556	0.797246	0.889329	1.76936
H3BUR4	H3BUR4_HUMAN RNA-binding protein NOB1 OS=Homo sapiens GN=NOB1 PE=2 SV=1	66	46753.8	Q9ULX3;	15	5	78.8		4	2	1	6	1	1	1.199e-06	1.227e-06	4.507e-07	1.153e-06	6.11e-07	6.114e-07	1.02335	0.375897	0.961635	0.509591	0.509925
P61160	ARP2_HUMAN Actin-related protein 2 OS=Homo sapiens GN=ACTR2 PE=1 SV=1	394	44840.3		10	4	14.7		1	1	1	3	1	3	1.726e-08	1.465e-07	1.563e-07	5.136e-08	1.338e-07	2.117e-07	8.48783	9.05562	2.97567	7.75203	12.2654
E9PKL9	E9PKL9_HUMAN GDP-L-fucose synthase (Fragment) OS=Homo sapiens GN=TSTA3 PE=2 SV=1	268	35960	E9PLH9;E9PP14;Q13630;	6	2	22.7	Oxidation (M)	1	1	1	1	1	1	3.582e-08	1.074e-07	1.093e-07	2.601e-08	8.152e-08	9.358e-08	2.99832	3.05137	0.726131	2.27582	2.61251
Q9UNF1	MAGD2_HUMAN Melanoma-associated antigen D2 OS=Homo sapiens GN=MAGED2 PE=1 SV=2	606	65094.5		40	14	24.4		6.48	5.02	8	3.51	3.04	9	1.108e-07	9.6e-08	1.382e-07	5.641e-08	5.392e-08	1.673e-07	0.866426	1.24729	0.509116	0.486643	1.50993
P51148	RAB5C_HUMAN Ras-related protein Rab-5C OS=Homo sapiens GN=RAB5C PE=1 SV=2	216	27090.6	P51148-2;	16	4	22.7		1.99	1.99	3.98	1.99	3.98	1.99	6.895e-08	1.821e-07	2.784e-07	8.349e-08	1.88e-07	1.573e-07	2.64104	4.03771	1.21088	2.72661	2.28136
P54619	AAKG1_HUMAN 5'-AMP-activated protein kinase subunit gamma-1 OS=Homo sapiens GN=PRKAG1 PE=1 SV=1	331	38598.4	P54619-2;P54619-3;	28	6	26.4		3.96	3.96	6.93	2.97	3.96	5.94	1.565e-07	4.667e-07	1.183e-06	7.864e-08	5.99e-07	8.093e-07	2.98211	7.55911	0.502492	3.82748	5.17125
P30050	RL12_HUMAN 60S ribosomal protein L12 OS=Homo sapiens GN=RPL12 PE=1 SV=1	165	17843.6		32	8	57.6	Carbamidomethyl (C),Gln->pyro-Glu (N-term Q)	14			17	2	1	2.023e-06			2.086e-06	2.096e-07	1.334e-07	Control1 Only	Control1 Only	1.03114	0.103609	0.0659417
O00767	ACOD_HUMAN Acyl-CoA desaturase OS=Homo sapiens GN=SCD PE=1 SV=2	359	41586.2		8	3	13.9		2	1	1	2	1	1	9.298e-08	1.08e-07	1.213e-07	4.879e-08	1.217e-07	8.85e-08	1.16154	1.30458	0.524737	1.30888	0.951818
O95163	ELP1_HUMAN Elongator complex protein 1 OS=Homo sapiens GN=IKBKAP PE=1 SV=3	1332	150555		33	12	12.6		1	7	9	3	8	5	9.302e-09	6.558e-08	8.332e-08	1.226e-08	5.073e-08	6.341e-08	7.0501	8.95721	1.318	5.45367	6.81681
K7EIN2	K7EIN2_HUMAN Protein syndesmos (Fragment) OS=Homo sapiens GN=NUDT16L1 PE=4 SV=1	198	23377.3	Q9BRJ7;	20	6	36.9	Oxidation (M)	6.97	1	2.99	4.98	3	2	5.298e-07	1.581e-07	4.567e-07	2.976e-07	3.479e-07	2.949e-07	0.298414	0.862023	0.561721	0.656663	0.556625
P56192	SYMC_HUMAN Methionine--tRNA ligase, cytoplasmic OS=Homo sapiens GN=MARS PE=1 SV=2	900	101304		102	16	22.2	Carbamidomethyl (C),Gln->pyro-Glu (N-term Q),Oxidation (M)	6.94	22.81	23.8	9.91	18.85	18.85	1.016e-07	3.726e-07	3.412e-07	1.286e-07	2.601e-07	2.79e-07	3.66732	3.35827	1.26575	2.56004	2.74606
Q96QK1	VPS35_HUMAN Vacuolar protein sorting-associated protein 35 OS=Homo sapiens GN=VPS35 PE=1 SV=2	796	91883.1		21	5	8.5			5	5		4	7		6.795e-08	7.295e-08		6.013e-08	1.148e-07	Control2 Only	Control3 Only		Sample2 Only	Sample3 Only
Q96QR8	PURB_HUMAN Transcriptional activator protein Pur-beta OS=Homo sapiens GN=PURB PE=1 SV=3	312	33310.5		9	2	10.3		3		2	1	1	2	4.062e-08		5.325e-08	1.926e-08	8.29e-09	8.988e-08	Control1 Only	1.31093	0.474151	0.204087	2.2127
P46940	IQGA1_HUMAN Ras GTPase-activating-like protein IQGAP1 OS=Homo sapiens GN=IQGAP1 PE=1 SV=1	1657	189620		450	67	47.3	Acetylation (Protein N-term),Carbamidomethyl (C),Oxidation (M)	63.95	92.85	78.89	66.91	60.9	81.87	2.66e-07	7.348e-07	4.811e-07	3.497e-07	3.851e-07	4.907e-07	2.76241	1.80865	1.31466	1.44774	1.84474
P13639	EF2_HUMAN Elongation factor 2 OS=Homo sapiens GN=EEF2 PE=1 SV=4	858	95529.1		159	31	42.9	Carbamidomethyl (C),Oxidation (M)	12	32	34	12	37	33	2.38e-07	8.979e-07	9.37e-07	2.127e-07	6.81e-07	8.276e-07	3.77269	3.93697	0.893697	2.86134	3.47731
P61163	ACTZ_HUMAN Alpha-centractin OS=Homo sapiens GN=ACTR1A PE=1 SV=1	376	42695		37	9	29.5	Oxidation (M)	1.99	7.93	5.95	1.99	5.96	6.94	2.247e-08	9.111e-07	8.956e-07	2.844e-08	9.827e-07	1.18e-06	40.5474	39.8576	1.26569	43.7339	52.5145
CONT_ALBU_BOVIN	Possible Contaminant ALBU_BOVIN	607	69428.5		222	26	40.2	Carbamidomethyl (C),Oxidation (M)	29	45	46	16	40	47	6.383e-07	1.879e-06	2.191e-06	3.652e-07	1.86e-06	1.727e-06	2.94376	3.43256	0.572145	2.91399	2.70562
O00571	DDX3X_HUMAN ATP-dependent RNA helicase DDX3X OS=Homo sapiens GN=DDX3X PE=1 SV=3	662	71491	O00571-2;	63	17	29.6		17	4	9	18	6	9	5.359e-07	2.029e-07	2.018e-07	4.642e-07	1.068e-07	2.058e-07	0.378615	0.376563	0.866206	0.199291	0.384027
O43592	XPOT_HUMAN Exportin-T OS=Homo sapiens GN=XPOT PE=1 SV=2	962	110181		17	5	5.6	Oxidation (M)	5	3	2	3	2	2	6.513e-08	4.592e-08	3.443e-08	3.389e-08	3.347e-08	4.966e-08	0.705051	0.528635	0.520344	0.513895	0.762475
P12236	ADT3_HUMAN ADP/ATP translocase 3 OS=Homo sapiens GN=SLC25A6 PE=1 SV=4	298	32917.2		34	17	53	Acetylation (Protein N-term),Carbamidomethyl (C),Oxidation (M)	5	3.5	5.5	5	3.5	4.5	7.082e-07	7.634e-07	1.639e-06	3.643e-07	6.437e-07	1.603e-06	1.07794	2.31432	0.514403	0.908924	2.26348
P21266	GSTM3_HUMAN Glutathione S-transferase Mu 3 OS=Homo sapiens GN=GSTM3 PE=1 SV=3	225	26596.2		199	18	76	Acetylation (Protein N-term),Carbamidomethyl (C),Oxidation (M)	32.96	32.96	33.97	28.97	32.96	36.95	5.402e-06	1.58e-05	1.578e-05	4.567e-06	1.467e-05	1.264e-05	2.92484	2.92114	0.845428	2.71566	2.33987
P35908	K22E_HUMAN Keratin, type II cytoskeletal 2 epidermal OS=Homo sapiens GN=KRT2 PE=1 SV=2	639	65573.3		72	79	95.6	Acetylation (Protein N-term),Carbamidomethyl (C),Oxidation (M)	9	16	14	9	13	11	3.016e-07	1.125e-06	9.367e-07	4.846e-07	8.1e-07	6.869e-07	3.73011	3.10577	1.60676	2.68568	2.27752
Q5XUX0	FBX31_HUMAN F-box only protein 31 OS=Homo sapiens GN=FBXO31 PE=1 SV=2	539	49133.5	Q5XUX0-2;	78	8	24.6	Carbamidomethyl (C),Oxidation (M)	12	13	13	9	16	15	3.056e-07	8.62e-07	8.483e-07	1.867e-07	7.583e-07	7.403e-07	2.82068	2.77585	0.610929	2.48135	2.42245
Q71U36	TBA1A_HUMAN Tubulin alpha-1A chain OS=Homo sapiens GN=TUBA1A PE=1 SV=1	451	46375.9	Q71U36-2;	15	31	82	Carbamidomethyl (C),Gln->pyro-Glu (N-term Q),Glu->pyro-Glu (N-term E),Oxidation (M)	2.94	0.98	2.96	1.96	2.94	2.95	6.476e-07	8.329e-07	1.185e-06	4.229e-07	9.183e-07	8.995e-07	1.28613	1.82983	0.653027	1.418	1.38897
P25705	ATPA_HUMAN ATP synthase subunit alpha, mitochondrial OS=Homo sapiens GN=ATP5A1 PE=1 SV=1	553	59875.7		483	39	67.1	Carbamidomethyl (C),Oxidation (M)	60.92	89.36	82.56	60.89	87.42	93.36	3.658e-06	2.045e-05	1.929e-05	3.114e-06	1.832e-05	1.624e-05	5.59049	5.27337	0.851285	5.0082	4.43958
Q9Y230	RUVB2_HUMAN RuvB-like 2 OS=Homo sapiens GN=RUVBL2 PE=1 SV=3	463	51250.6		126	23	50.1	Acetylation (Protein N-term),Carbamidomethyl (C),Oxidation (M)	31.75	14.89	20.85	20.84	12.92	23.81	1.436e-06	1.383e-06	2.142e-06	8.589e-07	1.183e-06	2.155e-06	0.963092	1.49164	0.59812	0.823816	1.5007
P06493	CDK1_HUMAN Cyclin-dependent kinase 1 OS=Homo sapiens GN=CDK1 PE=1 SV=3	297	34145.9		91	16	64	Oxidation (M)	12.9	14.92	18.9	13.91	16.91	12.94	8.049e-07	2.752e-06	2.957e-06	6.526e-07	2.584e-06	2.3e-06	3.41906	3.67375	0.810784	3.21034	2.8575
Q8NC69	KCTD6_HUMAN BTB/POZ domain-containing protein KCTD6 OS=Homo sapiens GN=KCTD6 PE=2 SV=2	237	27646.5		525	19	87.8	Acetylation (Protein N-term),Carbamidomethyl (C),Oxidation (M)	83.5	54	66	89.5	60.5	68.5	3.779e-05	5.938e-05	7.836e-05	2.936e-05	5.597e-05	6.856e-05	1.57132	2.07356	0.776925	1.48108	1.81424
E9PF10	E9PF10_HUMAN Nuclear pore complex protein Nup155 OS=Homo sapiens GN=NUP155 PE=2 SV=1	1327	149317	O75694;O75694-2;	10	7	7.4		1	2	2	1		4	6.392e-09	1.282e-08	1.151e-08	3.168e-09		2.091e-08	2.00563	1.80069	0.49562	Control1 Only	3.27128
P60174	TPIS_HUMAN Triosephosphate isomerase OS=Homo sapiens GN=TPI1 PE=1 SV=3	286	17983.3	P60174-1;P60174-4;	8	2	15		2	1		2	3		7.837e-08	8.763e-08		6.026e-08	7.48e-08		1.11816	Control1 Only	0.768917	0.954447	Control1 Only
P17858	K6PL_HUMAN 6-phosphofructokinase, liver type OS=Homo sapiens GN=PFKL PE=1 SV=6	780	85180.3		326	39	55.3	Acetylation (Protein N-term),Carbamidomethyl (C),Oxidation (M)	41	55.5	66.5	39	54.5	64	1.09e-06	2.118e-06	2.494e-06	8.762e-07	1.874e-06	2.096e-06	1.94312	2.28807	0.803853	1.71927	1.92294
Q96KP4	CNDP2_HUMAN Cytosolic non-specific dipeptidase OS=Homo sapiens GN=CNDP2 PE=1 SV=2	475	52971		16	4	11.4		1.99	3.98	2	1.99	2.99	2.99	1.763e-08	1.803e-07	1.79e-07	3.726e-08	1.292e-07	1.44e-07	10.2269	10.1531	2.11344	7.32842	8.1679
O75643	U520_HUMAN U5 small nuclear ribonucleoprotein 200 kDa helicase OS=Homo sapiens GN=SNRNP200 PE=1 SV=2	2136	244983		144	43	24.2	Carbamidomethyl (C),Oxidation (M)	79			63	1	1	3.009e-07			2.454e-07	1.531e-09	1.937e-09	Control1 Only	Control1 Only	0.815553	0.00508807	0.00643735
F5H7I0	F5H7I0_HUMAN BTB/POZ domain-containing protein KCTD6 (Fragment) OS=Homo sapiens GN=KCTD6 PE=2 SV=1	74	8335.12		40	6	86.5	Acetylation (Protein N-term),Oxidation (M)	9	5	5	8	6	7	9.262e-06	1.229e-05	1.318e-05	6.874e-06	1.017e-05	1.311e-05	1.32693	1.42302	0.742172	1.09803	1.41546
P53007	TXTP_HUMAN Tricarboxylate transport protein, mitochondrial OS=Homo sapiens GN=SLC25A1 PE=1 SV=2	311	34081.1		23	6	18		5	3	4	4	3	4	2.843e-07	3.77e-07	5.999e-07	1.83e-07	3.434e-07	5.332e-07	1.32606	2.11009	0.643686	1.20788	1.87548
Q7Z6Z7	HUWE1_HUMAN E3 ubiquitin-protein ligase HUWE1 OS=Homo sapiens GN=HUWE1 PE=1 SV=3	4374	482013	Q7Z6Z7-2;Q7Z6Z7-3;	26	9	2.9		0.99	5.94	4.95	0.99	6.93	5.94	9.158e-10	7.992e-09	4.928e-09	7.869e-10	8.204e-09	8.354e-09	8.7268	5.38109	0.859249	8.95829	9.12208
B4E1G6	B4E1G6_HUMAN Galactokinase OS=Homo sapiens GN=GALK1 PE=2 SV=1	422	42353.6	P51570;	66	16	42.1	Carbamidomethyl (C)	6.99	7.99	11.97	10.99	13.98	13.98	2.61e-07	7.259e-07	1.057e-06	2.669e-07	9.623e-07	1.182e-06	2.78123	4.04981	1.02261	3.68697	4.52874
F8W9B4	F8W9B4_HUMAN Replication factor C subunit 5 OS=Homo sapiens GN=RFC5 PE=2 SV=1	255	36172	P40937;P40937-2;	40	8	38	Carbamidomethyl (C),Oxidation (M)	6.99	2.99	6.99	7	6.98	8.98	4.041e-07	3.425e-07	1.046e-06	2.507e-07	8.56e-07	1.011e-06	0.847562	2.58847	0.620391	2.11829	2.50186
P58107	EPIPL_HUMAN Epiplakin OS=Homo sapiens GN=EPPK1 PE=1 SV=2	5090	556792		388	114	64.5	Carbamidomethyl (C),Gln->pyro-Glu (N-term Q),Oxidation (M)	145.5	1	0.5	120	0.5	3.5	5.583e-07	4.44e-10	2.947e-10	4.616e-07	3.483e-10	4.199e-09	0.000795271	0.000527852	0.826796	0.000623858	0.00752105
P24539	AT5F1_HUMAN ATP synthase F(0) complex subunit B1, mitochondrial OS=Homo sapiens GN=ATP5F1 PE=1 SV=2	256	28962.4		33	6	26.2	Gln->pyro-Glu (N-term Q),Oxidation (M)	3	5	5	6	9	5	1.708e-07	8.942e-07	1.012e-06	3.015e-07	1.484e-06	6.529e-07	5.23536	5.92506	1.76522	8.68852	3.8226
P36578	RL4_HUMAN 60S ribosomal protein L4 OS=Homo sapiens GN=RPL4 PE=1 SV=5	427	47793.5		41	10	26.5	Oxidation (M)	13.93	1	2	13.93	2	7.98	5.847e-07	9.314e-09	3.22e-08	5.99e-07	1.886e-08	1.261e-07	0.0159295	0.055071	1.02446	0.0322559	0.215666
P05089	ARGI1_HUMAN Arginase-1 OS=Homo sapiens GN=ARG1 PE=1 SV=2	322	35731.9	P05089-2;	23	7	23.9	Oxidation (M)	5	3	5	4	4	2	3.582e-08	5.182e-08	9.787e-08	6.025e-08	1.127e-07	4.972e-08	1.44668	2.73227	1.68202	3.14629	1.38805
Q14204	DYHC1_HUMAN Cytoplasmic dynein 1 heavy chain 1 OS=Homo sapiens GN=DYNC1H1 PE=1 SV=5	4646	533459		476	109	26.5	Carbamidomethyl (C),Oxidation (M)	65	92	75	77	64	106	6.818e-08	1.632e-07	1.122e-07	9.756e-08	1.26e-07	1.857e-07	2.39366	1.64564	1.43092	1.84805	2.72367
P05141	ADT2_HUMAN ADP/ATP translocase 2 OS=Homo sapiens GN=SLC25A5 PE=1 SV=7	298	32903.2		44	19	64.4	Acetylation (Protein N-term),Carbamidomethyl (C),Gln->pyro-Glu (N-term Q),Oxidation (M)	8.5	4.5	6.5	7.5	5.5	9	7.854e-07	9.395e-07	1.64e-06	4.797e-07	1.156e-06	2.271e-06	1.19621	2.08811	0.610772	1.47186	2.89152
P38646	GRP75_HUMAN Stress-70 protein, mitochondrial OS=Homo sapiens GN=HSPA9 PE=1 SV=2	679	73832.9		1540	66	77.2	Carbamidomethyl (C),Gln->pyro-Glu (N-term Q),Oxidation (M)	155.87	291.65	322.66	138.89	305.66	328.66	1.175e-05	3.574e-05	3.648e-05	7.724e-06	3.177e-05	3.457e-05	3.0417	3.10468	0.657362	2.70383	2.94213
Q92616	GCN1L_HUMAN Translational activator GCN1 OS=Homo sapiens GN=GCN1L1 PE=1 SV=6	2671	293365		49	20	9.8	Acetylation (Protein N-term),Oxidation (M)	11	8	9	8	5	8	3.777e-08	2.986e-08	4.776e-08	2.745e-08	2.967e-08	3.806e-08	0.790575	1.2645	0.726767	0.785544	1.00768
P07437	TBB5_HUMAN Tubulin beta chain OS=Homo sapiens GN=TUBB PE=1 SV=2	444	49765		341	33	84.2	Carbamidomethyl (C),Oxidation (M)	67.32	47.52	47.52	73.26	52.47	49.5	1.319e-05	2.833e-05	2.563e-05	1.174e-05	2.445e-05	2.297e-05	2.14784	1.94314	0.890068	1.85368	1.74147
Q4VXZ8	Q4VXZ8_HUMAN Peroxisomal 2,4-dienoyl-CoA reductase OS=Homo sapiens GN=DECR2 PE=2 SV=1	280	25644.5	Q9NUI1;Q9NUI1-3;	6	3	12.7				2	1	1	2			1.215e-07	9.891e-09	2.196e-08	6.971e-08		Control3 Only	Sample1 Only	Sample2 Only	Sample3 Only
B4DF41	B4DF41_HUMAN DNA mismatch repair protein Msh6 OS=Homo sapiens GN=MSH6 PE=2 SV=1	1230	153085	F5H2F9;P52701;	45	14	13.9	Carbamidomethyl (C),Oxidation (M)	7.99	8.99	7.99	7.98	5.99	5.99	2.406e-08	6.074e-08	6.253e-08	3.746e-08	4.292e-08	4.198e-08	2.52452	2.59892	1.55694	1.78387	1.7448
B4DGU4	B4DGU4_HUMAN Catenin beta-1 OS=Homo sapiens GN=CTNNB1 PE=2 SV=1	774	85676.4	P35222;	19	9	14.1	Carbamidomethyl (C),Oxidation (M)	3.5	1	3	3.5	2.5	4	3.319e-08	5.983e-09	2.327e-08	2.533e-08	2.125e-08	2.89e-08	0.180265	0.701115	0.763182	0.640253	0.870744
Q9Y678	COPG1_HUMAN Coatomer subunit gamma-1 OS=Homo sapiens GN=COPG1 PE=1 SV=1	874	97907.6		19	9	11.9		1	4	5	1	4	3.99	2.643e-08	7.054e-08	1.612e-07	2.343e-08	1.115e-07	1.714e-07	2.66894	6.09913	0.886493	4.21869	6.48505
P62888	RL30_HUMAN 60S ribosomal protein L30 OS=Homo sapiens GN=RPL30 PE=1 SV=2	115	12793.8		24	6	66.1	Carbamidomethyl (C),Oxidation (M)	9.97			9.97	1.99	1.99	1.896e-06			1.473e-06	3.094e-07	4.29e-07	Control1 Only	Control1 Only	0.776899	0.163186	0.226266
Q9H3P7	GCP60_HUMAN Golgi resident protein GCP60 OS=Homo sapiens GN=ACBD3 PE=1 SV=4	528	60700.1		6	3	10				3		1	2			5.392e-08		1.329e-08	3.122e-08		Control3 Only		Sample2 Only	Sample3 Only
P10398	ARAF_HUMAN Serine/threonine-protein kinase A-Raf OS=Homo sapiens GN=ARAF PE=1 SV=2	606	67722.4		22	3	5.6		2.04	1.56	2.56	3.6	1.56	2.08	3.41e-08	7.069e-08	1.048e-07	4.193e-08	6.679e-08	6.673e-08	2.07302	3.07331	1.22962	1.95865	1.95689
Q8IYB1	M21D2_HUMAN Protein MB21D2 OS=Homo sapiens GN=MB21D2 PE=1 SV=3	491	55908.4		48	12	28.7	Oxidation (M)	7	7	10	4	9	11	1.505e-07	5.059e-07	6.064e-07	7.078e-08	4.845e-07	5.256e-07	3.36146	4.02924	0.470299	3.21927	3.49236
P46109	CRKL_HUMAN Crk-like protein OS=Homo sapiens GN=CRKL PE=1 SV=1	303	33846		57	9	39.3	Carbamidomethyl (C)	10	6	12	8	10	11	5.085e-07	1.526e-06	2.081e-06	3.004e-07	1.496e-06	1.773e-06	3.00098	4.09243	0.590757	2.94199	3.48673
P52597	HNRPF_HUMAN Heterogeneous nuclear ribonucleoprotein F OS=Homo sapiens GN=HNRNPF PE=1 SV=3	415	45750.9		108	14	44.3	Acetylation (Protein N-term),Carbamidomethyl (C),Oxidation (M)	30	10	17	28	9	15	1.758e-06	1.139e-06	1.24e-06	1.538e-06	7.844e-07	1.267e-06	0.647895	0.705347	0.874858	0.446189	0.720705
J3KNW4	J3KNW4_HUMAN Four and a half LIM domains protein 2 OS=Homo sapiens GN=FHL2 PE=2 SV=1	389	32242.7	Q14192;	88	13	43.7	Carbamidomethyl (C),Gln->pyro-Glu (N-term Q),Oxidation (M)	11	13	21	9	14	20	1.07e-06	2.543e-06	4.203e-06	7.451e-07	2.688e-06	3.385e-06	2.37664	3.92804	0.696355	2.51215	3.16355
P33993	MCM7_HUMAN DNA replication licensing factor MCM7 OS=Homo sapiens GN=MCM7 PE=1 SV=4	719	81454.7		287	38	58.7	Acetylation (Protein N-term),Carbamidomethyl (C),Gln->pyro-Glu (N-term Q),Oxidation (M)	19.89	56.79	68.74	16.93	62.78	60.81	5.376e-07	1.851e-06	2.459e-06	3.891e-07	1.863e-06	1.972e-06	3.44308	4.57403	0.723772	3.4654	3.66815
P68371	TBB4B_HUMAN Tubulin beta-4B chain OS=Homo sapiens GN=TUBB4B PE=1 SV=1	445	49925.1		44	32	83.1	Carbamidomethyl (C),Oxidation (M)	7	7	7	6	8	9	2.506e-06	5.501e-06	5.483e-06	2.083e-06	4.818e-06	4.956e-06	2.19513	2.18795	0.831205	1.92259	1.97765
P26641	EF1G_HUMAN Elongation factor 1-gamma OS=Homo sapiens GN=EEF1G PE=1 SV=3	437	50213.2		140	18	36.6	Acetylation (Protein N-term),Carbamidomethyl (C),Gln->pyro-Glu (N-term Q)	17	25	26	16	28	28	8.472e-07	3.853e-06	3.666e-06	6.351e-07	3.225e-06	3.471e-06	4.54792	4.3272	0.749646	3.80666	4.09703
P02786	TFR1_HUMAN Transferrin receptor protein 1 OS=Homo sapiens GN=TFRC PE=1 SV=2	760	85034.1		620	38	52	Gln->pyro-Glu (N-term Q),Oxidation (M)	35.75	149.1	136.14	33.78	139.16	122.24	5.807e-07	7.035e-06	6.068e-06	5.001e-07	6.041e-06	5.52e-06	12.1147	10.4495	0.861202	10.403	9.50577
Q15645	PCH2_HUMAN Pachytene checkpoint protein 2 homolog OS=Homo sapiens GN=TRIP13 PE=1 SV=2	432	48646.6		141	14	34.5	Oxidation (M)	24.92	23.91	25.89	19.93	23.89	21.93	8.175e-07	2.46e-06	2.895e-06	6.793e-07	3.048e-06	1.684e-06	3.00917	3.54128	0.830948	3.72844	2.05994
Q9NZB2	F120A_HUMAN Constitutive coactivator of PPAR-gamma-like protein 1 OS=Homo sapiens GN=FAM120A PE=1 SV=2	1118	125535	Q9NZB2-6;	9	2	2.8		1	2	1	1	2	2	4.556e-09	6.296e-09	6.281e-09	4.058e-09	5.7e-09	1.091e-08	1.38191	1.37862	0.890694	1.2511	2.39464
P41091	IF2G_HUMAN Eukaryotic translation initiation factor 2 subunit 3 OS=Homo sapiens GN=EIF2S3 PE=1 SV=3	472	51203.3		31	12	32.4	Acetylation (Protein N-term),Carbamidomethyl (C)	5.96	3.96	3.97	5.95	1.98	8.95	1.838e-07	3.114e-07	2.966e-07	1.839e-07	1.273e-07	6.046e-07	1.69423	1.61371	1.00054	0.692601	3.28945
P20700	LMNB1_HUMAN Lamin-B1 OS=Homo sapiens GN=LMNB1 PE=1 SV=2	586	66529.7		144	47	68.1	Acetylation (Protein N-term),Carbamidomethyl (C),Oxidation (M)	65.49		1	71.49		1	2.252e-06		3.647e-08	2.606e-06		6.478e-09	Control1 Only	0.0161945	1.15719	Control1 Only	0.00287655
P52272	HNRPM_HUMAN Heterogeneous nuclear ribonucleoprotein M OS=Homo sapiens GN=HNRNPM PE=1 SV=3	730	73770.5	P52272-2;	137	48	71.9	Acetylation (Protein N-term),Carbamidomethyl (C),Oxidation (M)	50.55			54.47		6.94	2.114e-06			1.752e-06		8.633e-08	Control1 Only	Control1 Only	0.828761	Control1 Only	0.0408373
Q9Y285	SYFA_HUMAN Phenylalanine--tRNA ligase alpha subunit OS=Homo sapiens GN=FARSA PE=1 SV=3	508	57671.6		69	17	40	Acetylation (Protein N-term),Carbamidomethyl (C),Oxidation (M)	0.98	11.83	16.75	0.99	15.77	22.65	8.36e-10	1.315e-06	1.846e-06	2.616e-08	1.642e-06	1.949e-06	1572.97	2208.13	31.2919	1964.11	2331.34
P47755	CAZA2_HUMAN F-actin-capping protein subunit alpha-2 OS=Homo sapiens GN=CAPZA2 PE=1 SV=3	286	33000.6		23	7	27.3	Acetylation (Protein N-term)	4	3	4	4	4	4	2.329e-07	6.022e-07	7.571e-07	1.913e-07	5.769e-07	6.141e-07	2.58566	3.25075	0.821383	2.47703	2.63675
Q9NTJ3	SMC4_HUMAN Structural maintenance of chromosomes protein 4 OS=Homo sapiens GN=SMC4 PE=1 SV=2	1288	140551	Q9NTJ3-2;	58	16	14.6	Oxidation (M)	10.98	9.99	9.99	4	11.98	10.99	3.647e-08	4.288e-08	4.551e-08	1.689e-08	7.657e-08	5.325e-08	1.17576	1.24787	0.46312	2.09953	1.4601
P68032	ACTC_HUMAN Actin, alpha cardiac muscle 1 OS=Homo sapiens GN=ACTC1 PE=1 SV=1	377	42131.9	P68133;	84	26	48.8	Glu->pyro-Glu (N-term E),Oxidation (M)	16.66	10.79	9.8	24.5	9.81	10.79	1.415e-06	4.193e-06	3.114e-06	2.787e-06	1.518e-06	3.382e-06	2.96325	2.20071	1.96961	1.07279	2.39011
Q9BTE3	MCMBP_HUMAN Mini-chromosome maintenance complex-binding protein OS=Homo sapiens GN=MCMBP PE=1 SV=2	642	72882.8	Q9BTE3-2;	71	13	21.2	Carbamidomethyl (C)	6	13	17	8	13	14	1.52e-07	5.809e-07	5.957e-07	1.603e-07	4.602e-07	5.332e-07	3.82171	3.91908	1.05461	3.02763	3.50789
P63151	2ABA_HUMAN Serine/threonine-protein phosphatase 2A 55 kDa regulatory subunit B alpha isoform OS=Homo sapiens GN=PPP2R2A PE=1 SV=1	447	53092.2	P63151-2;	11	3	8.1			2.98	1.99		2.98	2.98		2.604e-07	2.552e-07		2.617e-07	3.338e-07	Control2 Only	Control3 Only		Sample2 Only	Sample3 Only
G3V1R4	G3V1R4_HUMAN NOL1/NOP2/Sun domain family, member 2, isoform CRA_b OS=Homo sapiens GN=NSUN2 PE=2 SV=1	531	82556.9	Q08J23;Q08J23-2;	13	5	12.4			3	5		3	3		4.984e-08	6.218e-08		4.346e-08	5.146e-08	Control2 Only	Control3 Only		Sample2 Only	Sample3 Only
Q14126	DSG2_HUMAN Desmoglein-2 OS=Homo sapiens GN=DSG2 PE=1 SV=2	1118	122542		32	16	20		18			13		1	1.351e-07			1.087e-07		6.073e-09	Control1 Only	Control1 Only	0.804589	Control1 Only	0.0449519
P62269	RS18_HUMAN 40S ribosomal protein S18 OS=Homo sapiens GN=RPS18 PE=1 SV=3	152	17743.9		39	11	57.9	Acetylation (Protein N-term),Oxidation (M)	18	1		19		1	2.51e-06	1.897e-08		2.031e-06		1.843e-07	0.00755777	Control1 Only	0.809163	Control1 Only	0.0734263
Q0VDF9	HSP7E_HUMAN Heat shock 70 kDa protein 14 OS=Homo sapiens GN=HSPA14 PE=1 SV=1	509	54904.1		5	2	4.5				2		2	1			5.604e-08		3.821e-08	9.277e-09		Control3 Only		Sample2 Only	Sample3 Only
B4DFA2	B4DFA2_HUMAN Vesicle-fusing ATPase OS=Homo sapiens GN=NSF PE=2 SV=1	644	82758.2	I3L0N3;P46459;	9	5	8.7			1	4		1	3		8.493e-09	6.911e-08		1.456e-08	5.114e-08	Control2 Only	Control3 Only		Sample2 Only	Sample3 Only
C9JJ19	C9JJ19_HUMAN 28S ribosomal protein S34, mitochondrial OS=Homo sapiens GN=MRPS34 PE=2 SV=2	225	25688.5	P82930;	17	4	16.5		6	1	2	5	2	2	5.213e-07	7.927e-08	2.197e-07	3.31e-07	1.352e-07	2.46e-07	0.152062	0.421446	0.634951	0.259352	0.471897
Q9Y266	NUDC_HUMAN Nuclear migration protein nudC OS=Homo sapiens GN=NUDC PE=1 SV=1	331	38309.2		7	3	10.6		1	1	1	2	1	1	3.153e-08	1.231e-07	1.349e-07	4.323e-08	8.369e-08	1.22e-07	3.90422	4.27846	1.37108	2.6543	3.86933
H0Y818	H0Y818_HUMAN DNA mismatch repair protein Mlh1 (Fragment) OS=Homo sapiens GN=MLH1 PE=4 SV=1	679	76011.8		17	7	10.9	Carbamidomethyl (C) + Ammonia-loss (N-term C)	0.99	2.97	2.96	0.99	3.96	4.94	1.034e-08	1.028e-07	2.783e-08	6.882e-09	7.064e-08	8.676e-08	9.94197	2.69149	0.665571	6.83172	8.39072
P62917	RL8_HUMAN 60S ribosomal protein L8 OS=Homo sapiens GN=RPL8 PE=1 SV=2	257	28079.3		41	12	33.5		15.8	0.99	0.99	20.74	0.99	1.98	2.041e-06	1.462e-07	2.165e-07	2.154e-06	1.983e-07	3.775e-07	0.0716316	0.106075	1.05537	0.0971583	0.184958
Q9NPD3	EXOS4_HUMAN Exosome complex component RRP41 OS=Homo sapiens GN=EXOSC4 PE=1 SV=3	245	26438.5		10	4	18.8	Acetylation (Protein N-term)	1	2	2		3	2	3.924e-08	3.564e-07	3.336e-07		3.994e-07	2.34e-07	9.08257	8.50153	Control1 Only	10.1784	5.9633
J3KN55	J3KN55_HUMAN Cob(I)yrinic acid a,c-diamide adenosyltransferase, mitochondrial OS=Homo sapiens GN=MMAB PE=2 SV=1	159	21816.2	Q96EY8;S4R3P5;	4	2	12.6		2			1		1	1.248e-07			6.813e-08		7.788e-08	Control1 Only	Control1 Only	0.545913	Control1 Only	0.624038
H0Y566	H0Y566_HUMAN BTB/POZ domain-containing protein KCTD3 (Fragment) OS=Homo sapiens GN=KCTD3 PE=4 SV=1	213	88948.7	Q9Y597;Q9Y597-2;	5	2	8.5			1	1		1	2		5.576e-08	4.111e-08		1.097e-08	7.147e-08	Control2 Only	Control3 Only		Sample2 Only	Sample3 Only
C9JAB2	C9JAB2_HUMAN Serine/arginine-rich-splicing factor 7 OS=Homo sapiens GN=SRSF7 PE=2 SV=1	235	26050.3	Q16629;Q16629-2;Q16629-3;Q16629-4;	13	4	31.1		5.5			4.5	1	1	4.168e-07			4.002e-07	4.066e-08	3.988e-08	Control1 Only	Control1 Only	0.960173	0.0975528	0.0956814
P39656	OST48_HUMAN Dolichyl-diphosphooligosaccharide--protein glycosyltransferase 48 kDa subunit OS=Homo sapiens GN=DDOST PE=1 SV=4	456	50895		32	7	16.4		3.98	3.99	6.97	3.98	6.96	5.98	9.598e-08	3.383e-07	5.594e-07	6.244e-08	4.55e-07	3.49e-07	3.52469	5.8283	0.650552	4.74057	3.63617
P61353	RL27_HUMAN 60S ribosomal protein L27 OS=Homo sapiens GN=RPL27 PE=1 SV=2	136	15823.8		37	9	55.1	Oxidation (M)	17.9			15.89	0.99	1.99	3.824e-06			2.648e-06	2.125e-07	5.128e-07	Control1 Only	Control1 Only	0.692469	0.0555701	0.1341
P01833	PIGR_HUMAN Polymeric immunoglobulin receptor OS=Homo sapiens GN=PIGR PE=1 SV=4	764	83447.8		6	2	4.1			2	1	1	1	1		1.815e-08	1.016e-08	9.853e-09	6.016e-09	8.325e-09	Control2 Only	Control3 Only	Sample1 Only	Sample2 Only	Sample3 Only
P31153	METK2_HUMAN S-adenosylmethionine synthase isoform type-2 OS=Homo sapiens GN=MAT2A PE=1 SV=1	395	43741.4		61	10	25.3	Oxidation (M)	4	10.98	12.98	5	13.97	13.97	1.539e-07	1.96e-06	2.178e-06	1.727e-07	1.999e-06	1.631e-06	12.7355	14.152	1.12216	12.989	10.5978
P50990	TCPQ_HUMAN T-complex protein 1 subunit theta OS=Homo sapiens GN=CCT8 PE=1 SV=4	548	59744.6		60	16	30.5	Oxidation (M)	13.86	4.95	8.92	13.86	7.92	10.89	4.601e-07	3.082e-07	6.396e-07	3.396e-07	3.384e-07	5.579e-07	0.669854	1.39013	0.7381	0.735492	1.21256
P11021	GRP78_HUMAN 78 kDa glucose-regulated protein OS=Homo sapiens GN=HSPA5 PE=1 SV=2	654	72468.5		2703	64	78.4	Carbamidomethyl (C),Oxidation (M)	254	525	539	223	569	552	3.179e-05	0.0001194	0.0001196	2.098e-05	0.0001077	0.0001181	3.7559	3.76219	0.659956	3.38786	3.715
F5H8J2	F5H8J2_HUMAN Uncharacterized protein OS=Homo sapiens GN=P4HB PE=3 SV=1	451	57224.8	H7BZ94;P07237;	34	10	26.8	Oxidation (M)	4.95	2.96	6.92	4.94	7.91	5.94	7.586e-08	2.022e-07	3.465e-07	8.388e-08	2.408e-07	2.204e-07	2.66544	4.56762	1.10572	3.17427	2.90535
G8JLB6	G8JLB6_HUMAN Heterogeneous nuclear ribonucleoprotein H OS=Homo sapiens GN=HNRNPH1 PE=2 SV=1	472	49324.5	P31943;	34	9	30.3	Acetylation (Protein N-term),Carbamidomethyl (C)	10.72	1.94	2.91	11.7	1.94	3.88	4.828e-07	1.159e-07	2.118e-07	4.102e-07	1.076e-07	1.92e-07	0.240058	0.438691	0.849627	0.222867	0.39768
Q9NXV2	KCTD5_HUMAN BTB/POZ domain-containing protein KCTD5 OS=Homo sapiens GN=KCTD5 PE=1 SV=1	234	26130.1		8	2	12		1		2	2	1	2	4.961e-08		2.025e-07	4.283e-08	9.735e-08	1.495e-07	Control1 Only	4.08184	0.863334	1.96231	3.01351
P07686	HEXB_HUMAN Beta-hexosaminidase subunit beta OS=Homo sapiens GN=HEXB PE=1 SV=3	556	63233.3		28	11	16.5	Oxidation (M)	5.97	2.99	5.95	5.96	3	3.98	1.36e-07	2.279e-07	2.673e-07	1.383e-07	1.64e-07	2.501e-07	1.67574	1.96544	1.01691	1.20588	1.83897
H7C1F6	H7C1F6_HUMAN ES1 protein homolog, mitochondrial (Fragment) OS=Homo sapiens GN=C21orf33 PE=4 SV=1	257	24796	P30042;P30042-2;	6	4	27.4	Oxidation (M)		0.99	0.99	1.99		1.99		7.139e-08	7.889e-08	5.314e-08		1.2e-07	Control2 Only	Control3 Only	Sample1 Only		Sample3 Only
P62277	RS13_HUMAN 40S ribosomal protein S13 OS=Homo sapiens GN=RPS13 PE=1 SV=2	151	17247.7		35	8	45		15.94			16.92	1	1	2.551e-06			2.359e-06	2.513e-07	2.548e-07	Control1 Only	Control1 Only	0.924735	0.0985104	0.0998824
P04264	K2C1_HUMAN Keratin, type II cytoskeletal 1 OS=Homo sapiens GN=KRT1 PE=1 SV=6	644	66179.1		3181	82	73.6	Acetylation (Protein N-term),Carbamidomethyl (C),Gln->pyro-Glu (N-term Q),Oxidation (M)	246	272	297.5	248.5	298	262	3.17e-05	7.364e-05	9.323e-05	3.047e-05	0.0001214	6.509e-05	2.32303	2.94101	0.961199	3.82965	2.05331
Q9NP72	RAB18_HUMAN Ras-related protein Rab-18 OS=Homo sapiens GN=RAB18 PE=1 SV=1	206	23016.7		17	5	30.1		5.95	1.98	0.99	4.95	0.99	1.99	3.687e-07	2.053e-07	1.19e-07	2.383e-07	1.36e-07	2.34e-07	0.556821	0.322756	0.646325	0.368864	0.634662
P49327	FAS_HUMAN Fatty acid synthase OS=Homo sapiens GN=FASN PE=1 SV=3	2511	273993		1168	106	53.1	Acetylation (Protein N-term),Carbamidomethyl (C),Carbamidomethyl (C) + Ammonia-loss (N-term C),Gln->pyro-Glu (N-term Q),Oxidation (M)	176	247	218	134	173	224	9.106e-07	2.009e-06	1.518e-06	7.143e-07	1.506e-06	1.736e-06	2.20624	1.66703	0.784428	1.65385	1.90644
P12004	PCNA_HUMAN Proliferating cell nuclear antigen OS=Homo sapiens GN=PCNA PE=1 SV=1	261	28822.3		57	13	65.1	Carbamidomethyl (C),Oxidation (M)	11	8	8	13	10	7	6.869e-07	1.426e-06	1.181e-06	5.865e-07	1.323e-06	1.025e-06	2.07599	1.71932	0.853836	1.92604	1.49221
Q5D862	FILA2_HUMAN Filaggrin-2 OS=Homo sapiens GN=FLG2 PE=1 SV=1	2391	248630		59	8	6.6	Carbamidomethyl (C)	8	9	11	11	11	9	2.733e-08	4.66e-08	6.082e-08	2.02e-08	6.625e-08	3.036e-08	1.70509	2.22539	0.739115	2.42408	1.11087
B3KSQ1	B3KSQ1_HUMAN Very-long-chain enoyl-CoA reductase OS=Homo sapiens GN=TECR PE=2 SV=1	323	36100.8	Q9NZ01;	9	4	12		4		1	2	1	1	9.394e-08		1.824e-07	4.359e-08	1.26e-07	1.449e-07	Control1 Only	1.94166	0.46402	1.34128	1.54247
H0Y368	H0Y368_HUMAN Dolichol-phosphate mannosyltransferase (Fragment) OS=Homo sapiens GN=DPM1 PE=4 SV=1	295	32478.1	O60762;Q5QPK2;	95	16	66.9	Gln->pyro-Glu (N-term Q),Oxidation (M)	18.89	7.98	12.95	24.87	16.94	12.95	1.572e-06	1.884e-06	2.535e-06	1.597e-06	2.869e-06	2.19e-06	1.19847	1.6126	1.0159	1.82506	1.39313
E5RIF2	E5RIF2_HUMAN Brefeldin A-inhibited guanine nucleotide-exchange protein 1 OS=Homo sapiens GN=ARFGEF1 PE=2 SV=1	1254	209175	Q9Y6D6;	9	6	5.7		1.49	0.99	1.98	0.5	0.99	1.98	1.077e-08	1.096e-08	9.103e-09	2.624e-09	9.653e-09	1.415e-08	1.01764	0.845218	0.24364	0.896286	1.31383
D3DQ30	D3DQ30_HUMAN HCG40295, isoform CRA_d OS=Homo sapiens GN=TTC39A PE=2 SV=1	550	65851.1	G3XAF8;Q5SRH9-4;Q5SRH9-5;	10	4	8.2		2.97	1.98	0.99	0.99	0.99	1.98	3.078e-08	7.193e-08	1.558e-08	7.128e-09	3.839e-08	5.737e-08	2.33691	0.506173	0.231579	1.24724	1.86387
Q99714	HCD2_HUMAN 3-hydroxyacyl-CoA dehydrogenase type-2 OS=Homo sapiens GN=HSD17B10 PE=1 SV=3	261	26978.2		161	12	73.6	Carbamidomethyl (C),Oxidation (M)	27.8	25.79	23.82	28.8	26.8	26.81	3e-06	6.38e-06	5.492e-06	2.345e-06	5.399e-06	5.689e-06	2.12667	1.83067	0.781667	1.79967	1.89633
F8WEF7	F8WEF7_HUMAN Deleted in malignant brain tumors 1 protein OS=Homo sapiens GN=DMBT1 PE=2 SV=1	1133	181344	Q9UGM3;Q9UGM3-2;Q9UGM3-3;Q9UGM3-4;Q9UGM3-5;Q9UGM3-6;Q9UGM3-7;Q9UGM3-8;	12	2	7.3		2	3	2	2	2	1	2.426e-08	3.261e-08	2.191e-08	1.744e-08	2.573e-08	2.528e-08	1.34419	0.903133	0.718879	1.06059	1.04204
CONT_K2C1_HUMAN	Possible Contaminant K2C1_HUMAN	643	66027.1		3117	78	73.7	Acetylation (Protein N-term),Carbamidomethyl (C),Gln->pyro-Glu (N-term Q),Oxidation (M)	237	263	287.5	233.5	287	252	2.822e-05	6.547e-05	8.235e-05	2.656e-05	0.000108	5.672e-05	2.31999	2.91814	0.941176	3.82707	2.00992
P60228	EIF3E_HUMAN Eukaryotic translation initiation factor 3 subunit E OS=Homo sapiens GN=EIF3E PE=1 SV=1	445	52313.5		8	2	4.3			1.98	1.98		1.98	1.98		1.277e-07	1.121e-07		1.23e-07	1.492e-07	Control2 Only	Control3 Only		Sample2 Only	Sample3 Only
Q14694	UBP10_HUMAN Ubiquitin carboxyl-terminal hydrolase 10 OS=Homo sapiens GN=USP10 PE=1 SV=2	798	87713.1	Q14694-2;Q14694-3;	9	3	4		0.99	0.99	2.97		1.98	2.97	4.71e-09	2.113e-08	3.878e-08		2.115e-08	3.456e-08	4.4862	8.23355	Control1 Only	4.49045	7.33758
P81605	DCD_HUMAN Dermcidin OS=Homo sapiens GN=DCD PE=1 SV=2	110	11294.8		42	5	42.7		5	9	7	8	4	9	4.268e-07	1.122e-06	9.917e-07	3.732e-07	7.395e-07	1.163e-06	2.62887	2.32357	0.874414	1.73266	2.72493
F5GX33	F5GX33_HUMAN Calcium-binding mitochondrial carrier protein Aralar2 OS=Homo sapiens GN=SLC25A13 PE=2 SV=1	567	74454.8	Q9UJS0;Q9UJS0-2;	9	6	14.3		1	1	2		1	4	2.323e-08	2.252e-08	3.199e-08		1.716e-08	7.131e-08	0.969436	1.3771	Control1 Only	0.7387	3.06974
P30040	ERP29_HUMAN Endoplasmic reticulum resident protein 29 OS=Homo sapiens GN=ERP29 PE=1 SV=4	261	29047.2		35	10	41	Oxidation (M)	3	5	6	11	5	5	1.536e-07	6.236e-07	1.011e-06	5.127e-07	5.512e-07	5.343e-07	4.0599	6.58203	3.33789	3.58854	3.47852
Q00325	MPCP_HUMAN Phosphate carrier protein, mitochondrial OS=Homo sapiens GN=SLC25A3 PE=1 SV=2	362	40040.7	Q00325-2;	115	16	38.5	Carbamidomethyl (C),Oxidation (M)	18.95	10.98	18.95	20.95	18.94	26.92	1.761e-06	3.93e-06	5.87e-06	1.372e-06	5.194e-06	6.153e-06	2.23169	3.33333	0.779103	2.94946	3.49404
Q96TA1	NIBL1_HUMAN Niban-like protein 1 OS=Homo sapiens GN=FAM129B PE=1 SV=3	746	82847.1	Q96TA1-2;	15	5	7	Oxidation (M)		2	5		5	3		2.229e-08	6.359e-08		4.226e-08	3.279e-08	Control2 Only	Control3 Only		Sample2 Only	Sample3 Only
P62424	RL7A_HUMAN 60S ribosomal protein L7a OS=Homo sapiens GN=RPL7A PE=1 SV=2	266	30049.1		45	14	41.7	Carbamidomethyl (C)	17.97	0.99	0.99	21.95		2.99	1.17e-06	1.084e-08	6.613e-09	1.203e-06		1.214e-07	0.00926496	0.00565214	1.02821	Control1 Only	0.103761
P08729	K2C7_HUMAN Keratin, type II cytoskeletal 7 OS=Homo sapiens GN=KRT7 PE=1 SV=5	469	51480.4		168	45	73.6	Acetylation (Protein N-term),Oxidation (M)	79.5		3	74.5	3	7	8.487e-06		6.07e-08	7.384e-06	6.878e-08	3.099e-07	Control1 Only	0.00715211	0.870037	0.00810416	0.0365147
Q13155	AIMP2_HUMAN Aminoacyl tRNA synthase complex-interacting multifunctional protein 2 OS=Homo sapiens GN=AIMP2 PE=1 SV=2	320	35416.3		32	6	23.1	Carbamidomethyl (C),Oxidation (M)	3	6	6	3	6	8	1.499e-07	4.984e-07	7.905e-07	1.055e-07	6.754e-07	8.167e-07	3.32488	5.27352	0.703803	4.50567	5.4483
P54886	P5CS_HUMAN Delta-1-pyrroline-5-carboxylate synthase OS=Homo sapiens GN=ALDH18A1 PE=1 SV=2	795	87268.6	P54886-2;	43	13	18.5	Gln->pyro-Glu (N-term Q),Oxidation (M)	3	9	12	3	8	8	8.61e-08	9.911e-07	8.249e-07	8.92e-08	9.255e-07	6.939e-07	11.511	9.58072	1.036	10.7491	8.05923
P62633	CNBP_HUMAN Cellular nucleic acid-binding protein OS=Homo sapiens GN=CNBP PE=1 SV=1	177	19713.7	P62633-2;P62633-4;P62633-5;P62633-6;	18	5	31.8	Carbamidomethyl (C),Carbamidomethyl (C) + Ammonia-loss (N-term C)	4.96	1	2.98	2.98	1.98	3.97	3.344e-07	1.263e-07	2.228e-07	1.647e-07	1.969e-07	3.999e-07	0.377691	0.666268	0.492524	0.588816	1.19587
Q8WVX9	FACR1_HUMAN Fatty acyl-CoA reductase 1 OS=Homo sapiens GN=FAR1 PE=1 SV=1	515	59462.9		29	7	15		5	3	5	5	5	6	1.347e-07	2.913e-07	3.027e-07	1.157e-07	2.372e-07	2.979e-07	2.16258	2.24722	0.858946	1.76095	2.21158
J3KN39	J3KN39_HUMAN NACHT, LRR and PYD domains-containing protein 2 OS=Homo sapiens GN=NLRP2 PE=2 SV=1	1059	118113	Q9NX02;Q9NX02-2;Q9NX02-3;Q9NX02-4;Q9NX02-5;	26	9	12.1			6	6		8	7		7.398e-08	7.446e-08		9.796e-08	6.939e-08	Control2 Only	Control3 Only		Sample2 Only	Sample3 Only
Q13608	PEX6_HUMAN Peroxisome assembly factor 2 OS=Homo sapiens GN=PEX6 PE=1 SV=2	980	77910	Q8WYQ0;	4	2	3.7			1	1		1	1		3.265e-09	5.895e-09		5.067e-09	5.547e-09	Control2 Only	Control3 Only		Sample2 Only	Sample3 Only
Q96AB3	ISOC2_HUMAN Isochorismatase domain-containing protein 2, mitochondrial OS=Homo sapiens GN=ISOC2 PE=1 SV=1	205	14791.9	Q96AB3-2;Q96AB3-3;	15	3	47.4		2.98	1	2	2.98	2.99	2.98	2.158e-07	3.561e-07	3.824e-07	1.557e-07	3.948e-07	5.053e-07	1.65014	1.77201	0.721501	1.82947	2.34152
P22695	QCR2_HUMAN Cytochrome b-c1 complex subunit 2, mitochondrial OS=Homo sapiens GN=UQCRC2 PE=1 SV=3	453	48539		138	17	49	Carbamidomethyl (C),Oxidation (M)	9.91	26.72	30.68	10.89	26.7	32.67	1.594e-07	3.205e-06	3.143e-06	2.425e-07	2.598e-06	3.09e-06	20.1066	19.7177	1.52133	16.2986	19.3852
Q08211	DHX9_HUMAN ATP-dependent RNA helicase A OS=Homo sapiens GN=DHX9 PE=1 SV=4	1270	141247		60	17	15.4	Carbamidomethyl (C),Oxidation (M)	11	12	9	11	7	11	6.405e-08	1.066e-07	9.092e-08	7.853e-08	4.147e-08	1.141e-07	1.66432	1.41952	1.22607	0.647463	1.78142
Q99456	K1C12_HUMAN Keratin, type I cytoskeletal 12 OS=Homo sapiens GN=KRT12 PE=1 SV=1	494	53622.5		12	8	10.7	Oxidation (M)	1	3	4	1	4	3	5.142e-09	3.871e-08	3.072e-08	5.449e-09	3.499e-08	2.549e-08	7.5282	5.97433	1.0597	6.80475	4.95722
Q16401	PSMD5_HUMAN 26S proteasome non-ATPase regulatory subunit 5 OS=Homo sapiens GN=PSMD5 PE=1 SV=3	504	51405.8	Q16401-2;	35	10	25.8	Acetylation (Protein N-term)	5	3	8	6	5	8	1.82e-07	2.728e-07	5.449e-07	1.593e-07	3.171e-07	4.256e-07	1.4989	2.99396	0.875275	1.74231	2.33846
B3KY94	B3KY94_HUMAN CDP-diacylglycerol--inositol 3-phosphatidyltransferase OS=Homo sapiens GN=CDIPT PE=2 SV=1	237	23577.2	H3BTV1;O14735;	4	2	13.7	Oxidation (M)	2			1		1	1.405e-07			4.156e-08		8.433e-08	Control1 Only	Control1 Only	0.295801	Control1 Only	0.600214
Q92804	RBP56_HUMAN TATA-binding protein-associated factor 2N OS=Homo sapiens GN=TAF15 PE=1 SV=1	592	61683.1	Q92804-2;	14	4	13.1		5.94			6.93		0.99	2.051e-07			1.695e-07		1.529e-08	Control1 Only	Control1 Only	0.826426	Control1 Only	0.074549
E9PFW3	E9PFW3_HUMAN AP-2 complex subunit mu OS=Homo sapiens GN=AP2M1 PE=2 SV=1	460	49484	Q96CW1;Q96CW1-2;	34	13	28.6	Carbamidomethyl (C),Oxidation (M)	1.99	6.96	7.97	1.98	6.96	8.94	8.789e-08	5.259e-07	6.445e-07	1.034e-07	5.305e-07	7.369e-07	5.98362	7.33303	1.17647	6.03595	8.38434
Q9UBM7	DHCR7_HUMAN 7-dehydrocholesterol reductase OS=Homo sapiens GN=DHCR7 PE=1 SV=1	475	54579.8		12	4	8.6	Carbamidomethyl (C)	1	2	2	1	2	4	5.957e-08	2.482e-07	1.982e-07	4.486e-08	2.286e-07	2.794e-07	4.16653	3.32718	0.753064	3.8375	4.69028
F8W9U3	F8W9U3_HUMAN Alpha/beta hydrolase domain-containing protein 14B OS=Homo sapiens GN=ABHD14B PE=2 SV=1	208	22385.6	Q96IU4;	14	6	33.7	Acetylation (Protein N-term),Oxidation (M)	4.95	0.99	0.99	4.95	0.99	0.99	3.049e-07	1.891e-07	1.822e-07	3.447e-07	1.995e-07	1.918e-07	0.620203	0.597573	1.13053	0.654313	0.629059
P05023	AT1A1_HUMAN Sodium/potassium-transporting ATPase subunit alpha-1 OS=Homo sapiens GN=ATP1A1 PE=1 SV=1	1023	113234	P05023-3;P05023-4;	9	4	5.3			0.99	2.96		2.96	1.98		1.219e-08	3.166e-08		1.834e-08	2.108e-08	Control2 Only	Control3 Only		Sample2 Only	Sample3 Only
Q15046	SYK_HUMAN Lysine--tRNA ligase OS=Homo sapiens GN=KARS PE=1 SV=3	597	71631.5	Q15046-2;	7	7	13.2			1	3			3		4.604e-09	4.039e-08			4.962e-08	Control2 Only	Control3 Only			Sample3 Only
E9PIX6	E9PIX6_HUMAN Protein arginine N-methyltransferase 1 (Fragment) OS=Homo sapiens GN=PRMT1 PE=2 SV=1	209	40612.1	E9PKG1;E9PNR9;E9PQ98;H0YDE4;H7C2I1;Q99873;Q99873-2;Q99873-3;Q99873-4;	19	4	30.6		1	3	4	1	4	6	9.608e-08	6.719e-07	7.668e-07	9.018e-08	6.058e-07	9.675e-07	6.99313	7.98085	0.938593	6.30516	10.0697
P30101	PDIA3_HUMAN Protein disulfide-isomerase A3 OS=Homo sapiens GN=PDIA3 PE=1 SV=4	505	56890.8		51	12	25		5.98	5.98	9.97	9.96	10.96	7.98	2.66e-07	4.183e-07	6.442e-07	2.652e-07	4.893e-07	4.658e-07	1.57256	2.4218	0.996992	1.83947	1.75113
E7ETB3	E7ETB3_HUMAN Aspartyl aminopeptidase OS=Homo sapiens GN=DNPEP PE=2 SV=1	493	52521	Q9ULA0;	36	10	27.8	Carbamidomethyl (C),Oxidation (M)	3.93	5.89	7.87	4.92	4.92	7.87	2.323e-07	5.395e-07	8.761e-07	2.039e-07	5.532e-07	7.604e-07	2.32243	3.77142	0.877744	2.3814	3.27335
Q04695	K1C17_HUMAN Keratin, type I cytoskeletal 17 OS=Homo sapiens GN=KRT17 PE=1 SV=2	432	48202.1		50	34	66.2	Carbamidomethyl (C),Oxidation (M)	0.99	1.97	19.89	1.98	20.85	3.95	2.213e-09	2.097e-08	8.586e-07	1.433e-08	8.76e-07	6.575e-08	9.47582	387.98	6.47537	395.843	29.7108
E7EQ69	E7EQ69_HUMAN N-alpha-acetyltransferase 50 OS=Homo sapiens GN=NAA50 PE=2 SV=1	168	19422.1	Q9GZZ1;	125	17	63.1	Carbamidomethyl (C),Oxidation (M)	27.63	13.82	12.82	27.63	20.76	20.74	4.37e-06	3.484e-06	2.641e-06	3.029e-06	4.433e-06	3.749e-06	0.797254	0.604348	0.693135	1.01442	0.857895
B1AK13	B1AK13_HUMAN 3-hydroxymethyl-3-methylglutaryl-Coenzyme A lyase (Hydroxymethylglutaricaciduria), isoform CRA_b OS=Homo sapiens GN=HMGCL PE=2 SV=1	300	34427.9	P35914;	19	4	16.3		2	2	4	3	4	4	4.707e-08	1.775e-07	5.029e-07	6.868e-08	2.807e-07	4.377e-07	3.77098	10.6841	1.4591	5.96346	9.29892
P04183	KITH_HUMAN Thymidine kinase, cytosolic OS=Homo sapiens GN=TK1 PE=1 SV=2	234	25506		96	13	65.4	Acetylation (Protein N-term),Carbamidomethyl (C),Oxidation (M)	15.86	11.89	15.86	15.86	13.87	21.83	2.861e-06	3.568e-06	4.753e-06	1.745e-06	3.478e-06	5.212e-06	1.24712	1.66131	0.609927	1.21566	1.82174
P28072	PSB6_HUMAN Proteasome subunit beta type-6 OS=Homo sapiens GN=PSMB6 PE=1 SV=4	239	25395.5		3	2	8.8		1			1	1		7.235e-08			4.212e-08	2.396e-08		Control1 Only	Control1 Only	0.58217	0.331168	Control1 Only
C9JJP5	C9JJP5_HUMAN Protein TFG (Fragment) OS=Homo sapiens GN=TFG PE=2 SV=1	181	43102	C9JTY3;C9JUE0;Q92734;Q92734-2;	5	2	14.1		1		1	1		2	8.731e-08		1.851e-07	9.176e-08		2.04e-07	Control1 Only	2.12003	1.05097	Control1 Only	2.3365
B0UX83	B0UX83_HUMAN HLA-B associated transcript 3, isoform CRA_a OS=Homo sapiens GN=BAG6 PE=4 SV=1	1126	113691	P46379;P46379-2;P46379-3;P46379-4;P46379-5;	3	2	2.5			1	0.99			0.99		4.779e-09	9.886e-09			1.294e-08	Control2 Only	Control3 Only			Sample3 Only
P62937	PPIA_HUMAN Peptidyl-prolyl cis-trans isomerase A OS=Homo sapiens GN=PPIA PE=1 SV=2	165	18036.9		175	14	79.4	Acetylation (Protein N-term),Carbamidomethyl (C),Oxidation (M)	47.47	17.78	15.81	45.51	27.68	18.78	1.287e-05	7.329e-06	6.207e-06	9.818e-06	9.065e-06	5.937e-06	0.569464	0.482284	0.762859	0.704351	0.461305
O15397	IPO8_HUMAN Importin-8 OS=Homo sapiens GN=IPO8 PE=1 SV=2	1037	120167		5	2	2.1		1		2	1		2	7.797e-09		9.703e-09	6.648e-09		9.213e-09	Control1 Only	1.24445	0.852636	Control1 Only	1.18161
A0FGR8-2	ESYT2_HUMAN Isoform 2 of Extended synaptotagmin-2 OS=Homo sapiens GN=ESYT2	893	98200.8	H7BXI1;	9	2	3.3		1	1	2	1	2	2	3.236e-09	4.048e-09	1.06e-08	3.238e-09	4.45e-09	1.192e-08	1.25093	3.27565	1.00062	1.37515	3.68356
P62913	RL11_HUMAN 60S ribosomal protein L11 OS=Homo sapiens GN=RPL11 PE=1 SV=2	178	20275.7		50	9	50.6	Acetylation (Protein N-term),Carbamidomethyl (C),Oxidation (M)	13.93	2.98	4.98	14.9	6.96	6.97	2.087e-06	3.375e-07	6.341e-07	1.312e-06	1.093e-06	8.655e-07	0.161715	0.303833	0.628654	0.523718	0.41471
Q92973	TNPO1_HUMAN Transportin-1 OS=Homo sapiens GN=TNPO1 PE=1 SV=2	898	101496	Q92973-2;	17	4	5.4		2.98	0.99	3.96	1.98	3.96	3.96	6.513e-08	1.657e-08	8.911e-08	4.502e-08	8.525e-08	5.414e-08	0.254414	1.36819	0.691233	1.30892	0.831261
Q96S55	WRIP1_HUMAN ATPase WRNIP1 OS=Homo sapiens GN=WRNIP1 PE=1 SV=2	665	69595.6	Q96S55-2;	38	12	21.2	Oxidation (M)	1.98	5.95	10.93	1	8.94	8.94	2.391e-08	1.404e-07	2.729e-07	2.16e-08	1.609e-07	2.228e-07	5.87202	11.4136	0.903388	6.7294	9.31828
Q9NQH7	XPP3_HUMAN Probable Xaa-Pro aminopeptidase 3 OS=Homo sapiens GN=XPNPEP3 PE=1 SV=1	507	54780.6	Q9NQH7-2;Q9NQH7-4;	36	7	19.4		4	7	7	3	7	8	1.247e-07	7.352e-07	5.952e-07	9.158e-08	5.831e-07	6.859e-07	5.89575	4.77306	0.734403	4.67602	5.5004
H0Y6C3	H0Y6C3_HUMAN Pyrroline-5-carboxylate reductase 3 (Fragment) OS=Homo sapiens GN=PYCRL PE=2 SV=1	261	27193		35	9	42.5	Carbamidomethyl (C),Oxidation (M)	6.61	2.02	2.53	4.06	2.55	2.53	4.007e-07	3.081e-07	3.165e-07	2.223e-07	4.32e-07	3.053e-07	0.768904	0.789868	0.554779	1.07811	0.761917
H0Y4R1	H0Y4R1_HUMAN Inosine-5'-monophosphate dehydrogenase 2 (Fragment) OS=Homo sapiens GN=IMPDH2 PE=3 SV=1	470	55913.7	P12268;	180	25	50.6	Carbamidomethyl (C),Oxidation (M)	23.5	19.5	20	42.5	15.5	20	1.424e-06	2.695e-06	2.526e-06	3.144e-06	1.73e-06	2.158e-06	1.89256	1.77388	2.20787	1.21489	1.51545
Q9Y3Z3	SAMH1_HUMAN Deoxynucleoside triphosphate triphosphohydrolase SAMHD1 OS=Homo sapiens GN=SAMHD1 PE=1 SV=2	626	68240.9	Q9Y3Z3-4;	16	6	11.3	Carbamidomethyl (C)		2.97	3.96		5.94	2.97		1.334e-07	9.61e-08		1.763e-07	6.927e-08	Control2 Only	Control3 Only		Sample2 Only	Sample3 Only
Q9BW92	SYTM_HUMAN Threonine--tRNA ligase, mitochondrial OS=Homo sapiens GN=TARS2 PE=1 SV=1	718	81183.5		4	2	3.1		1	1	1			1	8.66e-09	7.024e-09	9.357e-09			2.247e-08	0.811085	1.08048	Control1 Only	Control1 Only	2.59469
K7EJ81	K7EJ81_HUMAN 116 kDa U5 small nuclear ribonucleoprotein component OS=Homo sapiens GN=EFTUD2 PE=2 SV=1	962	105587	Q15029;Q15029-2;	43	18	21.5	Oxidation (M)	17.97	3	2	16.98	2	1	3.068e-07	2.506e-08	1.177e-08	2.989e-07	1.149e-08	1.098e-08	0.0816819	0.0383638	0.97425	0.0374511	0.0357888
P08727	K1C19_HUMAN Keratin, type I cytoskeletal 19 OS=Homo sapiens GN=KRT19 PE=1 SV=4	400	44187.2		1331	51	87	Gln->pyro-Glu (N-term Q),Glu->pyro-Glu (N-term E),Oxidation (M)	464.25	56.42	71.13	458.83	96.58	115.83	0.0003506	1.084e-05	2.012e-05	0.0003219	2.78e-05	4.781e-05	0.0309184	0.0573873	0.91814	0.0792926	0.136366
P53621	COPA_HUMAN Coatomer subunit alpha OS=Homo sapiens GN=COPA PE=1 SV=2	1224	138618		155	23	19.9	Carbamidomethyl (C),Oxidation (M)	19	29	31	14	31	32	8.12e-08	2.969e-07	2.841e-07	6.854e-08	2.355e-07	3.178e-07	3.6564	3.49877	0.844089	2.90025	3.91379
P27348	1433T_HUMAN 14-3-3 protein theta OS=Homo sapiens GN=YWHAQ PE=1 SV=1	245	27818.8		5	5	18.8	Oxidation (M)		1	1	1	1	1		1.088e-07	1.219e-07	3.923e-08	1.132e-07	9.417e-08	Control2 Only	Control3 Only	Sample1 Only	Sample2 Only	Sample3 Only
E9PFG1	E9PFG1_HUMAN Probable ubiquitin carboxyl-terminal hydrolase FAF-X OS=Homo sapiens GN=USP9X PE=2 SV=1	1018	291034	Q93008;Q93008-1;	13	3	3		4	1	2	2	1	3	1.468e-08	7.229e-09	1.403e-08	1.028e-08	7.584e-09	1.546e-08	0.492439	0.955722	0.700272	0.516621	1.05313
J3KN82	J3KN82_HUMAN Methylthioribulose-1-phosphate dehydratase OS=Homo sapiens GN=APIP PE=2 SV=1	259	27179.3	Q96GX9;	30	6	36	Carbamidomethyl (C),Oxidation (M)	5	5	5	5	5	5	1.762e-07	4.712e-07	4.529e-07	1.349e-07	5.177e-07	3.848e-07	2.67423	2.57037	0.765607	2.93814	2.18388
B9ZVX0	B9ZVX0_HUMAN Diaphanous homolog 1 (Drosophila), isoform CRA_a OS=Homo sapiens GN=DIAPH1 PE=2 SV=1	1248	140578	E7ERW8;E7ET75;E9PEZ3;E9PHQ0;H9KV28;O60610;O60610-2;O60610-3;	88	20	17.9	Oxidation (M)	2	27	20.99	1	18.99	18	4.015e-09	1.457e-07	9.943e-08	3.053e-09	1.259e-07	1.049e-07	36.2889	24.7646	0.760399	31.3574	26.127
Q9UL46	PSME2_HUMAN Proteasome activator complex subunit 2 OS=Homo sapiens GN=PSME2 PE=1 SV=4	239	27438.3		18	7	41.8	Oxidation (M)	8.98			7.99		1	4.477e-07			4.04e-07		7.074e-08	Control1 Only	Control1 Only	0.90239	Control1 Only	0.158008
O43143	DHX15_HUMAN Putative pre-mRNA-splicing factor ATP-dependent RNA helicase DHX15 OS=Homo sapiens GN=DHX15 PE=1 SV=2	795	91109.3		16	7	9.6	Oxidation (M)	5		2	5	1	3	8.141e-08		3.202e-08	6.505e-08	6.112e-09	3.533e-08	Control1 Only	0.393318	0.799042	0.0750768	0.433976
A1L0T0	ILVBL_HUMAN Acetolactate synthase-like protein OS=Homo sapiens GN=ILVBL PE=1 SV=2	632	68004.9		27	8	17.1	Carbamidomethyl (C),Oxidation (M)	3.99	4.96	3.97	5.98	2.98	4.98	4.504e-08	1.736e-07	6.796e-08	3.932e-08	1.147e-07	1.497e-07	3.85435	1.50888	0.873002	2.54663	3.32371
B4DLW8	B4DLW8_HUMAN Probable ATP-dependent RNA helicase DDX5 OS=Homo sapiens GN=DDX5 PE=2 SV=1	535	69284.8	J3KTA4;P17844;	10	8	15.3	Carbamidomethyl (C)	3		0.5	4			9.889e-08		1.027e-08	1.024e-07			Control1 Only	0.103853	1.03549	Control1 Only	Control1 Only
G5E9V5	G5E9V5_HUMAN 28S ribosomal protein S22, mitochondrial OS=Homo sapiens GN=MRPS22 PE=2 SV=1	359	41344.4	G5E9W7;P82650;	29	8	26		3	4	5	6	6.99	4.99	1.015e-07	4.899e-07	4.511e-07	1.497e-07	5.737e-07	3.736e-07	4.8266	4.44433	1.47488	5.65222	3.68079
F5H7M3	F5H7M3_HUMAN Dihydrolipoyllysine-residue acetyltransferase component of pyruvate dehydrogenase complex, mitochondrial OS=Homo sapiens GN=DLAT PE=2 SV=1	418	69133.2	H0YDD4;P10515;	10	2	5.5		0.99	0.99	2.98		1.98	2.98	1.76e-08	1.258e-08	1.012e-07		3.833e-08	8.478e-08	0.714773	5.75	Control1 Only	2.17784	4.81705
Q13616	CUL1_HUMAN Cullin-1 OS=Homo sapiens GN=CUL1 PE=1 SV=2	776	89838.1		11	5	6.1			2	4	1	2	2		2.91e-08	6.773e-08	7.238e-09	2.84e-08	5.573e-08	Control2 Only	Control3 Only	Sample1 Only	Sample2 Only	Sample3 Only
P51571	SSRD_HUMAN Translocon-associated protein subunit delta OS=Homo sapiens GN=SSR4 PE=1 SV=1	173	19022.6		9	4	30.6		5			2	1	1	3.381e-07			9.969e-08	1.375e-07	8.249e-08	Control1 Only	Control1 Only	0.294854	0.406684	0.243981
P13807	GYS1_HUMAN Glycogen [starch] synthase, muscle OS=Homo sapiens GN=GYS1 PE=1 SV=2	737	76632.9	P13807-2;	15	4	6.8			1	3.99	1	1.99	1.99		1.45e-08	5.553e-08	1.123e-08	1.852e-08	3.635e-08	Control2 Only	Control3 Only	Sample1 Only	Sample2 Only	Sample3 Only
P11498	PYC_HUMAN Pyruvate carboxylase, mitochondrial OS=Homo sapiens GN=PC PE=1 SV=2	1178	129894		7	3	2.9			1	2		2	2		1.281e-08	2.37e-08		1.709e-08	2.17e-08	Control2 Only	Control3 Only		Sample2 Only	Sample3 Only
E5RHW4	E5RHW4_HUMAN Erlin-2 (Fragment) OS=Homo sapiens GN=ERLIN2 PE=2 SV=1	338	37905.5	O94905;	13	6	17.8		4.95		0.99	5.95	0.99	0.99	2.936e-07		9.657e-08	2.073e-07	9.064e-08	1.143e-07	Control1 Only	0.328917	0.706063	0.308719	0.389305
E7EPB3	E7EPB3_HUMAN 60S ribosomal protein L14 OS=Homo sapiens GN=RPL14 PE=2 SV=1	124	23471	P50914;	24	7	54.8	Carbamidomethyl (C)	8	2	2	10	1	2	3.571e-06	4.161e-07	4.639e-07	3.749e-06	3.785e-07	5.203e-07	0.116522	0.129908	1.04985	0.105993	0.145701
H0YEN5	H0YEN5_HUMAN 40S ribosomal protein S2 (Fragment) OS=Homo sapiens GN=RPS2 PE=2 SV=1	195	31376.6	P15880;	31	7	39	Carbamidomethyl (C)	9.9	1.98	2.97	8.91	2.97	3.96	1.006e-06	2.444e-07	3.817e-07	7.65e-07	4.583e-07	4.898e-07	0.242942	0.379423	0.760437	0.455567	0.486879
Q8TE77	SSH3_HUMAN Protein phosphatase Slingshot homolog 3 OS=Homo sapiens GN=SSH3 PE=1 SV=2	659	73130.6		21	7	10.8	Oxidation (M)		4.95	4.96		6.94	3.97		8.51e-08	6.387e-08		9.068e-08	6.648e-08	Control2 Only	Control3 Only		Sample2 Only	Sample3 Only
P05783	K1C18_HUMAN Keratin, type I cytoskeletal 18 OS=Homo sapiens GN=KRT18 PE=1 SV=2	430	48154.6		1096	55	87.4	Gln->pyro-Glu (N-term Q),Oxidation (M)	430.91	37.99	56.97	403.92	72.99	93.97	0.0002245	5.525e-06	1.065e-05	0.0002079	1.518e-05	2.605e-05	0.0246102	0.0474388	0.926058	0.0676169	0.116036
P01834	IGKC_HUMAN Ig kappa chain C region OS=Homo sapiens GN=IGKC PE=1 SV=1	106	11619.7		55	6	80.2	Carbamidomethyl (C)	7	11	13	4	12	8	8.975e-07	3.9e-06	4.38e-06	5.306e-07	5.027e-06	3.235e-06	4.3454	4.88022	0.591198	5.60111	3.60446
Q9BVQ7	SPA5L_HUMAN Spermatogenesis-associated protein 5-like protein 1 OS=Homo sapiens GN=SPATA5L1 PE=1 SV=2	753	80876		6	2	4	Carbamidomethyl (C)	2.97		0.99	2.97			1.07e-07		4.204e-09	1.046e-07			Control1 Only	0.0392897	0.97757	Control1 Only	Control1 Only
Q13509	TBB3_HUMAN Tubulin beta-3 chain OS=Homo sapiens GN=TUBB3 PE=1 SV=2	450	50526.3		40	21	40.7	Carbamidomethyl (C),Oxidation (M)	10	5	4	9	7	6	5.252e-07	9.014e-07	8.705e-07	2.966e-07	9.656e-07	9.339e-07	1.7163	1.65746	0.564737	1.83854	1.77818
K7EJT5	K7EJT5_HUMAN 60S ribosomal protein L22 (Fragment) OS=Homo sapiens GN=RPL22 PE=2 SV=1	47	14813.8	K7EKS7;K7ELC4;K7EMH1;K7EP65;K7ERI7;P35268;	9	2	51.1		3	1		3	1	1	2.308e-06	4.541e-07		1.355e-06	5.524e-07	7.443e-07	0.19675	Control1 Only	0.587088	0.239341	0.322487
Q96HS1	PGAM5_HUMAN Serine/threonine-protein phosphatase PGAM5, mitochondrial OS=Homo sapiens GN=PGAM5 PE=1 SV=2	289	28074.5	Q96HS1-2;	10	6	22.7		4			5		1	2.622e-07			2.497e-07		2.398e-08	Control1 Only	Control1 Only	0.952326	Control1 Only	0.0914569
P61978	HNRPK_HUMAN Heterogeneous nuclear ribonucleoprotein K OS=Homo sapiens GN=HNRNPK PE=1 SV=1	463	47653.7	P61978-2;P61978-3;Q5T6W2;Q5T6W5;	14	6	21.4		5		2	4	1	3	1.007e-07		9.731e-08	7.439e-08	2.522e-08	1.082e-07	Control1 Only	0.966336	0.738729	0.250447	1.07448
P43490	NAMPT_HUMAN Nicotinamide phosphoribosyltransferase OS=Homo sapiens GN=NAMPT PE=1 SV=1	491	53485.6	Q5SYT8;	13	5	15.7		2	2	2	2	3	2	2.785e-08	1.628e-07	1.742e-07	2.409e-08	1.871e-07	1.381e-07	5.8456	6.25494	0.864991	6.71813	4.95871
A8MXP9	A8MXP9_HUMAN Matrin-3 OS=Homo sapiens GN=MATR3 PE=2 SV=1	895	94816.9	P43243;	48	18	31.6	Oxidation (M)	21.63		0.99	23.62		0.99	3.846e-07		3.563e-09	3.972e-07		7.554e-09	Control1 Only	0.00926417	1.03276	Control1 Only	0.0196412
H3BRF5	H3BRF5_HUMAN KIAA1970 protein, isoform CRA_c OS=Homo sapiens GN=EARS2 PE=2 SV=1	534	58795.7	H3BTB7;Q5JPH6;	8	3	5.5		2	2	1		1	3	1.111e-08	3.979e-08	2.433e-08		1.976e-08	5.155e-08	3.58146	2.18992	Control1 Only	1.77858	4.63996
B4DR61	B4DR61_HUMAN Protein transport protein Sec61 subunit alpha isoform 1 OS=Homo sapiens GN=SEC61A1 PE=2 SV=1	482	52356.6	P61619;	17	4	7.8	Oxidation (M)	1.98	3.96	2.97	0.99	2.97	3.96	4.148e-08	3.423e-07	2.011e-07	3.344e-08	2.143e-07	3.588e-07	8.25217	4.84812	0.806172	5.16635	8.64995
CONT_TRYP_PIG	Possible Contaminant TRYP_PIG	231	24447.8		138	2	7.8		21	24	24	19	26	24	0.0001021	0.000186	0.0001912	7.948e-05	0.0002373	0.0001743	1.82174	1.87267	0.778452	2.32419	1.70715
O75367	H2AY_HUMAN Core histone macro-H2A.1 OS=Homo sapiens GN=H2AFY PE=1 SV=4	372	39572.4	O75367-3;	113	18	63.6	Carbamidomethyl (C),Gln->pyro-Glu (N-term Q),Oxidation (M)	51.57			59.52		0.99	6.24e-06			6.406e-06		2.844e-08	Control1 Only	Control1 Only	1.0266	Control1 Only	0.00455769
E9PH29	E9PH29_HUMAN Thioredoxin-dependent peroxide reductase, mitochondrial OS=Homo sapiens GN=PRDX3 PE=2 SV=1	238	27747.2	P30048;	19	4	18.5		4	2	2	6	2	3	2.734e-07	3.315e-07	3.96e-07	4.003e-07	3.231e-07	3.111e-07	1.21251	1.44843	1.46416	1.18178	1.13789
Q93100	KPBB_HUMAN Phosphorylase b kinase regulatory subunit beta OS=Homo sapiens GN=PHKB PE=1 SV=3	1093	124070	Q93100-2;Q93100-3;Q93100-4;	6	3	3.5			1	2		1	2		1.063e-08	1.75e-08		9.048e-09	2.016e-08	Control2 Only	Control3 Only		Sample2 Only	Sample3 Only
Q14980	NUMA1_HUMAN Nuclear mitotic apparatus protein 1 OS=Homo sapiens GN=NUMA1 PE=1 SV=2	2115	200498	Q14980-2;Q14980-3;Q14980-4;	18	11	6.1	Oxidation (M)	6.99	1	3	1	1	5	7.954e-09	1.258e-09	4.063e-09	1.347e-09	1.685e-09	9.654e-09	0.158159	0.510812	0.169349	0.211843	1.21373
P09211	GSTP1_HUMAN Glutathione S-transferase P OS=Homo sapiens GN=GSTP1 PE=1 SV=2	210	23395.1		107	10	61.4	Carbamidomethyl (C),Oxidation (M)	18.86	14.9	17.87	17.87	15.89	20.85	3.273e-06	7.954e-06	9.693e-06	2.424e-06	9.007e-06	9.996e-06	2.43019	2.9615	0.740605	2.75191	3.05408
F5H355	F5H355_HUMAN Rab GTPase-binding effector protein 1 OS=Homo sapiens GN=RABEP1 PE=2 SV=1	819	95654.4	Q15276;Q15276-2;	13	6	9.8			4	2.5		3.5	2		3.348e-08	2.155e-08		2.972e-08	2.343e-08	Control2 Only	Control3 Only		Sample2 Only	Sample3 Only
P18085	ARF4_HUMAN ADP-ribosylation factor 4 OS=Homo sapiens GN=ARF4 PE=1 SV=3	180	20533.7		14	8	56.1	Carbamidomethyl (C),Oxidation (M)	5.94		0.99	3.96	1.98	0.99	7.636e-07		1.609e-07	4.108e-07	3.602e-07	1.794e-07	Control1 Only	0.210712	0.537978	0.471713	0.23494
P61981	1433G_HUMAN 14-3-3 protein gamma OS=Homo sapiens GN=YWHAG PE=1 SV=2	247	28357		11	7	25.9	Carbamidomethyl (C)	2	1	2	2	1	3	1.774e-07	1.515e-07	3.395e-07	1.331e-07	1.848e-07	3.319e-07	0.854002	1.91375	0.750282	1.04171	1.87091
J3QT28	J3QT28_HUMAN Mitotic checkpoint protein BUB3 (Fragment) OS=Homo sapiens GN=BUB3 PE=2 SV=1	278	37021.2	O43684;O43684-2;	9	5	18.7		0.99	0.99	1.98	0.99		3.96	3.625e-08	1.614e-07	1.975e-07	2.242e-08		3.613e-07	4.45241	5.44828	0.618483	Control1 Only	9.9669
A8MUB1	A8MUB1_HUMAN Tubulin alpha-4A chain OS=Homo sapiens GN=TUBA4A PE=2 SV=1	433	50018.4	P68366;	47	24	58.2	Carbamidomethyl (C),Gln->pyro-Glu (N-term Q),Oxidation (M)	8.99	7	6.99	6.99	8.99	7.98	7.616e-07	1.909e-06	1.877e-06	5.81e-07	2.018e-06	2.047e-06	2.50657	2.46455	0.762868	2.64968	2.68776
P05787	K2C8_HUMAN Keratin, type II cytoskeletal 8 OS=Homo sapiens GN=KRT8 PE=1 SV=7	483	53815.2		1746	88	96.9	Acetylation (Protein N-term),Gln->pyro-Glu (N-term Q),Glu->pyro-Glu (N-term E),Oxidation (M)	628.67	59.49	107.97	618.79	134.74	179.43	0.0003661	7.952e-06	1.738e-05	0.0003138	2.63e-05	4.427e-05	0.0217208	0.0474734	0.857143	0.0718383	0.120923
Q9NRR5	UBQL4_HUMAN Ubiquilin-4 OS=Homo sapiens GN=UBQLN4 PE=1 SV=2	601	63992.5		11	5	12.1	Acetylation (Protein N-term)	2.97		1.98	3.97		1.98	7.232e-08		4.326e-08	7.577e-08		4.286e-08	Control1 Only	0.598175	1.0477	Control1 Only	0.592644
H3BQZ7	H3BQZ7_HUMAN HCG2044799 OS=Homo sapiens GN=hCG_2044799 PE=4 SV=1	746	85268.3	Q1KMD3;	46	16	21.7	Carbamidomethyl (C),Oxidation (M)	16	3	3	18	2	4	3.34e-07	2.647e-08	3.731e-08	3.328e-07	1.512e-08	5.912e-08	0.0792515	0.111707	0.996407	0.0452695	0.177006
M0QZM1	M0QZM1_HUMAN Heterogeneous nuclear ribonucleoprotein M (Fragment) OS=Homo sapiens GN=HNRNPM PE=4 SV=1	383	40127.4		50	28	77.8	Oxidation (M)	13			12		1	1.038e-06			9.791e-07		3.708e-08	Control1 Only	Control1 Only	0.943256	Control1 Only	0.0357225
Q7L576	CYFP1_HUMAN Cytoplasmic FMR1-interacting protein 1 OS=Homo sapiens GN=CYFIP1 PE=1 SV=1	1253	145449		39	15	13.6	Oxidation (M)	0.97	9.82	8.87	1	8.86	9.83	7.019e-09	8.391e-08	8.429e-08	4.272e-09	7.916e-08	8.721e-08	11.9547	12.0088	0.608634	11.278	12.4248
P18827	SDC1_HUMAN Syndecan-1 OS=Homo sapiens GN=SDC1 PE=1 SV=3	310	32531.9		13	3	11.9		5		2	4		2	2.479e-07		1.727e-08	1.954e-07		6.388e-08	Control1 Only	0.0696652	0.788221	Control1 Only	0.257685
Q9UKM9-2	RALY_HUMAN Isoform 1 of RNA-binding protein Raly OS=Homo sapiens GN=RALY	290	30417.8		87	16	52.4	Oxidation (M)	35.34			48.15		1.95	4.501e-06			4.333e-06		8.523e-08	Control1 Only	Control1 Only	0.962675	Control1 Only	0.0189358
CONT_REF_HEVBR	Possible Contaminant REF_HEVBR	138	14748.7		281	9	76.1		41	46	54	37	52	51	1.199e-05	2.707e-05	3.332e-05	8.48e-06	2.779e-05	3.51e-05	2.25771	2.77898	0.707256	2.31776	2.92744
Q9Y6Q5	AP1M2_HUMAN AP-1 complex subunit mu-2 OS=Homo sapiens GN=AP1M2 PE=1 SV=4	423	48204.2		48	16	43.5	Carbamidomethyl (C),Oxidation (M)	1.5	3.99	6.49	1	4.99	7.99	4.897e-08	4.084e-07	6.446e-07	3.331e-08	4.041e-07	6.831e-07	8.3398	13.1632	0.680212	8.25199	13.9494
Q7Z3Y8	K1C27_HUMAN Keratin, type I cytoskeletal 27 OS=Homo sapiens GN=KRT27 PE=1 SV=2	459	49917.6		20	10	19.6	Gln->pyro-Glu (N-term Q),Oxidation (M)		3.98	4.98	6.98	1	2.99		6.506e-08	1.011e-07	8.315e-08	1.909e-08	6.094e-08	Control2 Only	Control3 Only	Sample1 Only	Sample2 Only	Sample3 Only
E7ETK5	E7ETK5_HUMAN Inosine-5'-monophosphate dehydrogenase 2 (Fragment) OS=Homo sapiens GN=IMPDH2 PE=2 SV=1	279	30663.8		78	11	33.7	Carbamidomethyl (C)	7.5	5.5	5	11.5	4.5	5	8.548e-07	1.149e-06	1.062e-06	1.493e-06	7.331e-07	8.857e-07	1.34417	1.2424	1.74661	0.857628	1.03615
F8VPD4	F8VPD4_HUMAN CAD protein OS=Homo sapiens GN=CAD PE=2 SV=1	2162	243496	P27708;	300	52	31.9	Acetylation (Protein N-term),Carbamidomethyl (C),Oxidation (M)	48	65	53	28	52	55	1.768e-07	3.782e-07	3.133e-07	1.188e-07	3.992e-07	3.38e-07	2.13914	1.77206	0.671946	2.25792	1.91176
B7Z955	B7Z955_HUMAN 6-phosphofructo-2-kinase OS=Homo sapiens GN=PFKFB3 PE=2 SV=1	534	58882	F2Z2I2;Q16875;Q16875-2;Q16875-3;Q5VX20;Q5W015;	6	6	13.4			1.98	0.99		1	1.99		8.593e-08	9.402e-09		4.125e-08	5.271e-08	Control2 Only	Control3 Only		Sample2 Only	Sample3 Only
P67809	YBOX1_HUMAN Nuclease-sensitive element-binding protein 1 OS=Homo sapiens GN=YBX1 PE=1 SV=3	324	35992.7		86	14	70.7	Acetylation (Protein N-term),Oxidation (M)	21.78	11.88	6.93	21.78	11.88	10.89	1.255e-06	8.676e-07	5.047e-07	1.187e-06	7.749e-07	6.416e-07	0.691315	0.402151	0.945817	0.61745	0.511235
O00743	PPP6_HUMAN Serine/threonine-protein phosphatase 6 catalytic subunit OS=Homo sapiens GN=PPP6C PE=1 SV=1	305	39011.5	O00743-3;	17	5	19.7		3.96	1.98	1.98	1.98	2.97	3.96	9.475e-08	1.686e-07	1.26e-07	3.549e-08	1.604e-07	1.902e-07	1.77942	1.32982	0.374565	1.69288	2.00739
O14828	SCAM3_HUMAN Secretory carrier-associated membrane protein 3 OS=Homo sapiens GN=SCAMP3 PE=1 SV=3	347	35268.9	O14828-2;	7	2	9		1	1	1	1	2	1	2.179e-08	9.38e-08	1.078e-07	2.847e-08	1.106e-07	8.161e-08	4.30473	4.94722	1.30656	5.07572	3.7453
P35250	RFC2_HUMAN Replication factor C subunit 2 OS=Homo sapiens GN=RFC2 PE=1 SV=3	354	35310.9	P35250-2;	8	3	12.2		3		1	2	1	1	9.493e-08		1.045e-07	5.215e-08	6.589e-08	8.359e-08	Control1 Only	1.10081	0.549352	0.69409	0.880544
P22087	FBRL_HUMAN rRNA 2'-O-methyltransferase fibrillarin OS=Homo sapiens GN=FBL PE=1 SV=2	321	33853.5		54	12	46.7	Carbamidomethyl (C)	21.81	0.99	2.97	22.8	2.97	2.97	1.722e-06	3.971e-08	2.628e-07	1.631e-06	1.748e-07	2.296e-07	0.0230604	0.152613	0.947154	0.10151	0.133333
E7EWK3	E7EWK3_HUMAN Probable ATP-dependent RNA helicase DHX36 (Fragment) OS=Homo sapiens GN=DHX36 PE=2 SV=1	797	111697	F5GZS0;Q9H2U1;Q9H2U1-2;Q9H2U1-3;	16	6	9.9	Carbamidomethyl (C)	1	3	3		6	3	6.26e-09	2.073e-08	2.077e-08		2.481e-08	2.215e-08	3.3115	3.31789	Control1 Only	3.96326	3.53834
E9PC52	E9PC52_HUMAN Histone-binding protein RBBP7 OS=Homo sapiens GN=RBBP7 PE=2 SV=1	416	47916.3	Q16576;	15	6	14.2		1		4.93	2.96	1.98	3.96	4.175e-08		4.466e-07	7.929e-08	1.516e-07	2.54e-07	Control1 Only	10.697	1.89916	3.63114	6.08383
Q8N1F7	NUP93_HUMAN Nuclear pore complex protein Nup93 OS=Homo sapiens GN=NUP93 PE=1 SV=2	819	93663.8		19	8	9.8		0.98	1.97	4.95	0.98	3.95	5.93	8.823e-09	2.075e-08	6.308e-08	5.812e-09	3.454e-08	5.299e-08	2.35181	7.1495	0.658733	3.91477	6.00589
B7Z4B8	B7Z4B8_HUMAN Heterogeneous nuclear ribonucleoprotein U-like protein 1 OS=Homo sapiens GN=HNRNPUL1 PE=2 SV=1	767	84957.1	M0R3F1;Q9BUJ2;Q9BUJ2-2;Q9BUJ2-4;	7	3	5.6		2.97			2.97		0.99	8.718e-08			7.425e-08		1.362e-08	Control1 Only	Control1 Only	0.851686	Control1 Only	0.156228
P62750	RL23A_HUMAN 60S ribosomal protein L23a OS=Homo sapiens GN=RPL23A PE=1 SV=1	156	17720.2		30	10	50		12.89		0.99	15.86		0.99	1.729e-06		1.266e-07	1.663e-06		1.895e-07	Control1 Only	0.0732215	0.961828	Control1 Only	0.109601
B8ZZ50	B8ZZ50_HUMAN Eukaryotic translation initiation factor 4E type 2 OS=Homo sapiens GN=EIF4E2 PE=2 SV=1	236	28416.2	B8ZZJ9;B9A044;O60573;	26	6	30.5		2.97	4.95	4.95	1.98	5.94	4.95	4.126e-08	2.691e-07	2.738e-07	2.295e-08	3e-07	2.586e-07	6.52206	6.63597	0.556229	7.27096	6.26757
P07384	CAN1_HUMAN Calpain-1 catalytic subunit OS=Homo sapiens GN=CAPN1 PE=1 SV=1	714	82036.3		22	9	13	Carbamidomethyl (C),Oxidation (M)	2	1	8	1.99	3.99	4.99	2.335e-08	8.515e-09	1.183e-07	2.467e-08	5.711e-08	6.749e-08	0.364668	5.06638	1.05653	2.44582	2.89036
Q13085	ACACA_HUMAN Acetyl-CoA carboxylase 1 OS=Homo sapiens GN=ACACA PE=1 SV=2	2346	266087		221	48	25.5	Acetylation (Protein N-term),Carbamidomethyl (C),Gln->pyro-Glu (N-term Q),Oxidation (M)	21.79	48.6	46.65	12.86	39.71	51.61	4.291e-08	1.728e-07	1.273e-07	2.351e-08	1.576e-07	1.618e-07	4.02703	2.96667	0.547891	3.6728	3.77068
P62258	1433E_HUMAN 14-3-3 protein epsilon OS=Homo sapiens GN=YWHAE PE=1 SV=1	255	29227.5		36	8	36.9	Acetylation (Protein N-term),Oxidation (M)	4.96	4.95	5.95	7.93	5.94	6.94	2.321e-07	6.06e-07	6.237e-07	3.218e-07	4.629e-07	6.738e-07	2.61094	2.6872	1.38647	1.9944	2.90306
E9PAV3	E9PAV3_HUMAN Nascent polypeptide-associated complex subunit alpha OS=Homo sapiens GN=NACA PE=2 SV=1	2078	94877.3	F8VNW4;F8VZJ2;F8W0W4;F8W1N5;H0YHX9;Q13765;Q13765-2;	37	4	69		8.95	3	3	9.95	5.98	5.98	1.083e-07	1.095e-07	1.238e-07	9.846e-08	1.049e-07	1.381e-07	1.01108	1.14312	0.909141	0.968606	1.27516
P38919	IF4A3_HUMAN Eukaryotic initiation factor 4A-III OS=Homo sapiens GN=EIF4A3 PE=1 SV=4	411	46949.2		62	18	49.9	Acetylation (Protein N-term),Oxidation (M)	27.89			33.93			1.483e-06			1.929e-06			Control1 Only	Control1 Only	1.30074	Control1 Only	Control1 Only
Q9H583	HEAT1_HUMAN HEAT repeat-containing protein 1 OS=Homo sapiens GN=HEATR1 PE=1 SV=3	2144	242846		52	25	13.7	Acetylation (Protein N-term),Oxidation (M)	31.96			19.97			1.36e-07			9.546e-08			Control1 Only	Control1 Only	0.701912	Control1 Only	Control1 Only
P62995	TRA2B_HUMAN Transformer-2 protein homolog beta OS=Homo sapiens GN=TRA2B PE=1 SV=1	288	33717.6		44	12	35.4	Acetylation (Protein N-term),Oxidation (M)	19.87			23.82			1.332e-06			1.729e-06			Control1 Only	Control1 Only	1.29805	Control1 Only	Control1 Only
Q6FI13	H2A2A_HUMAN Histone H2A type 2-A OS=Homo sapiens GN=HIST2H2AA3 PE=1 SV=3	130	14122.9		36	13	70.8	Oxidation (M)	12.68			22.42			2.813e-05			4.795e-05			Control1 Only	Control1 Only	1.70459	Control1 Only	Control1 Only
Q01546	K22O_HUMAN Keratin, type II cytoskeletal 2 oral OS=Homo sapiens GN=KRT76 PE=1 SV=2	638	65980.2		34	39	51.3	Carbamidomethyl (C),Oxidation (M)			1			33			1.171e-08			1.068e-06		Control3 Only			Sample3 Only
O00567	NOP56_HUMAN Nucleolar protein 56 OS=Homo sapiens GN=NOP56 PE=1 SV=4	594	66170.8		33	15	36	Carbamidomethyl (C),Oxidation (M)	16.9			15.89			5.223e-07			4.325e-07			Control1 Only	Control1 Only	0.828068	Control1 Only	Control1 Only
Q9UKD2	MRT4_HUMAN mRNA turnover protein 4 homolog OS=Homo sapiens GN=MRTO4 PE=1 SV=2	239	27596.9		31	12	54	Gln->pyro-Glu (N-term Q),Oxidation (M)	15			17			6.132e-07			7.301e-07			Control1 Only	Control1 Only	1.19064	Control1 Only	Control1 Only
Q9Y2X3	NOP58_HUMAN Nucleolar protein 58 OS=Homo sapiens GN=NOP58 PE=1 SV=1	529	59684.6		30	7	17.4	Oxidation (M)	16			14			7.056e-07			5.585e-07			Control1 Only	Control1 Only	0.791525	Control1 Only	Control1 Only
Q9Y512	SAM50_HUMAN Sorting and assembly machinery component 50 homolog OS=Homo sapiens GN=SAMM50 PE=1 SV=3	469	52069.4		30	12	24.3	Carbamidomethyl (C),Oxidation (M)	16			14			8.172e-07			6.282e-07			Control1 Only	Control1 Only	0.768722	Control1 Only	Control1 Only
P18077	RL35A_HUMAN 60S ribosomal protein L35a OS=Homo sapiens GN=RPL35A PE=1 SV=2	110	12547.8		29	11	57.3	Oxidation (M)	14.96			14.95			1.975e-06			1.481e-06			Control1 Only	Control1 Only	0.749873	Control1 Only	Control1 Only
P61254	RL26_HUMAN 60S ribosomal protein L26 OS=Homo sapiens GN=RPL26 PE=1 SV=1	145	17283.6		28	13	57.2	Oxidation (M)	10.75			16.63			1.544e-06			1.778e-06			Control1 Only	Control1 Only	1.15155	Control1 Only	Control1 Only
P40429	RL13A_HUMAN 60S ribosomal protein L13a OS=Homo sapiens GN=RPL13A PE=1 SV=2	203	23616.4		26	9	39.9	Acetylation (Protein N-term),Carbamidomethyl (C),Oxidation (M)	11.97			13.96			1.416e-06			1.637e-06			Control1 Only	Control1 Only	1.15607	Control1 Only	Control1 Only
P50402	EMD_HUMAN Emerin OS=Homo sapiens GN=EMD PE=1 SV=1	254	29048		26	8	37.8		12			14			1.157e-06			1.204e-06			Control1 Only	Control1 Only	1.04062	Control1 Only	Control1 Only
M0R117	M0R117_HUMAN 60S ribosomal protein L18a OS=Homo sapiens GN=RPL18A PE=2 SV=1	154	20784.9	Q02543;	25	11	57.1	Carbamidomethyl (C),Oxidation (M)	13.87			12.88			2.06e-06			1.438e-06			Control1 Only	Control1 Only	0.698058	Control1 Only	Control1 Only
P07305	H10_HUMAN Histone H1.0 OS=Homo sapiens GN=H1F0 PE=1 SV=3	194	20904.2		24	5	27.3	Acetylation (Protein N-term),Oxidation (M)	10			14			9.751e-07			1.307e-06			Control1 Only	Control1 Only	1.34038	Control1 Only	Control1 Only
J9JID7	J9JID7_HUMAN Lamin B2, isoform CRA_a OS=Homo sapiens GN=LMNB2 PE=2 SV=1	620	67809.6	Q03252;	23	17	21.5		7.5			10.5			1.556e-07			2.298e-07			Control1 Only	Control1 Only	1.47686	Control1 Only	Control1 Only
C9JRZ6	C9JRZ6_HUMAN Coiled-coil-helix-coiled-coil-helix domain-containing protein 3, mitochondrial OS=Homo sapiens GN=CHCHD3 PE=2 SV=1	232	26190.3	F8WAR4;Q9NX63;	21	11	38.3		11.97			8.98			9.034e-07			6.472e-07			Control1 Only	Control1 Only	0.716405	Control1 Only	Control1 Only
P04908	H2A1B_HUMAN Histone H2A type 1-B/E OS=Homo sapiens GN=HIST1H2AB PE=1 SV=2	130	14149	Q7L7L0;	20	12	70.8		4.95			14.85			2.184e-06			5.796e-06			Control1 Only	Control1 Only	2.65385	Control1 Only	Control1 Only
Q9Y446	PKP3_HUMAN Plakophilin-3 OS=Homo sapiens GN=PKP3 PE=1 SV=1	797	87263.1		19	9	13.3		8.99			9.98			1.385e-07			1.359e-07			Control1 Only	Control1 Only	0.981227	Control1 Only	Control1 Only
P09493-10	TPM1_HUMAN Isoform 10 of Tropomyosin alpha-1 chain OS=Homo sapiens GN=TPM1	284	32917.8		19	42	86.6	Gln->pyro-Glu (N-term Q),Oxidation (M)	2.88			15.35			1.556e-07			8.22e-07			Control1 Only	Control1 Only	5.28278	Control1 Only	Control1 Only
B1AN48	B1AN48_HUMAN Small proline-rich protein 3 (Fragment) OS=Homo sapiens GN=SPRR3 PE=2 SV=1	159	18178.2	F5GZ12;Q9UBC9;	18	9	70.4	Carbamidomethyl (C),Gln->pyro-Glu (N-term Q)						18						2.806e-06					Sample3 Only
P02452	CO1A1_HUMAN Collagen alpha-1(I) chain OS=Homo sapiens GN=COL1A1 PE=1 SV=5	1464	139289		18	9	7.9	Gln->pyro-Glu (N-term Q)		18						3.133e-07					Control2 Only
O76021	RL1D1_HUMAN Ribosomal L1 domain-containing protein 1 OS=Homo sapiens GN=RSL1D1 PE=1 SV=3	490	55083		18	10	19.2		7.91			9.88			2.118e-07			3.658e-07			Control1 Only	Control1 Only	1.7271	Control1 Only	Control1 Only
Q6DN03	H2B2C_HUMAN Putative histone H2B type 2-C OS=Homo sapiens GN=HIST2H2BC PE=5 SV=3	193	18042.5	Q6DRA6;	18	7	28.7	Oxidation (M)	7.98			7.98			1.229e-06			9.14e-07			Control1 Only	Control1 Only	0.743694	Control1 Only	Control1 Only
P31431	SDC4_HUMAN Syndecan-4 OS=Homo sapiens GN=SDC4 PE=1 SV=2	198	16571.1	P31431-2;	18	4	32		10			8			3.228e-07			2.743e-07			Control1 Only	Control1 Only	0.849752	Control1 Only	Control1 Only
P62244	RS15A_HUMAN 40S ribosomal protein S15a OS=Homo sapiens GN=RPS15A PE=1 SV=2	130	14866		17	9	70.8	Carbamidomethyl (C),Oxidation (M)	8.92			7.93			1.055e-06			7.18e-07			Control1 Only	Control1 Only	0.680569	Control1 Only	Control1 Only
Q9UMS4	PRP19_HUMAN Pre-mRNA-processing factor 19 OS=Homo sapiens GN=PRPF19 PE=1 SV=1	504	55290.4		16	8	21.2	Carbamidomethyl (C),Oxidation (M)	9.99			5.99			3.69e-07			1.518e-07			Control1 Only	Control1 Only	0.411382	Control1 Only	Control1 Only
O15230	LAMA5_HUMAN Laminin subunit alpha-5 OS=Homo sapiens GN=LAMA5 PE=1 SV=8	3695	400577		16	13	4.4		12			4			1.074e-08			3.221e-09			Control1 Only	Control1 Only	0.299907	Control1 Only	Control1 Only
P24928	RPB1_HUMAN DNA-directed RNA polymerase II subunit RPB1 OS=Homo sapiens GN=POLR2A PE=1 SV=2	1970	217615		16	13	8.7		11			5			2.269e-08			1.148e-08			Control1 Only	Control1 Only	0.50595	Control1 Only	Control1 Only
B4E241	B4E241_HUMAN Serine/arginine-rich-splicing factor 3 OS=Homo sapiens GN=SFRS3 PE=2 SV=1	124	19353.9	P84103;	15	4	37.9		6.5			7.5			2.407e-06			2.464e-06			Control1 Only	Control1 Only	1.02368	Control1 Only	Control1 Only
B7Z7A3	B7Z7A3_HUMAN Nucleolar GTP-binding protein 1 OS=Homo sapiens GN=GTPBP4 PE=2 SV=1	587	74097.9	Q9BZE4;	15	8	17.5	Oxidation (M)	6.93			7.92			2.103e-07			1.982e-07			Control1 Only	Control1 Only	0.942463	Control1 Only	Control1 Only
O75340	PDCD6_HUMAN Programmed cell death protein 6 OS=Homo sapiens GN=PDCD6 PE=1 SV=1	191	21908.8		15	6	36.6	Oxidation (M)	6.98			7.98			3.748e-07			3.853e-07			Control1 Only	Control1 Only	1.02801	Control1 Only	Control1 Only
O75955	FLOT1_HUMAN Flotillin-1 OS=Homo sapiens GN=FLOT1 PE=1 SV=3	427	47451.7		15	9	23.9		6.96			7.95			1.563e-07			1.494e-07			Control1 Only	Control1 Only	0.955854	Control1 Only	Control1 Only
B5MCF9	B5MCF9_HUMAN Pescadillo homolog OS=Homo sapiens GN=PES1 PE=2 SV=1	571	67575.9	O00541;O00541-2;	14	8	13		7.92			5.94			2.12e-07			1.459e-07			Control1 Only	Control1 Only	0.688208	Control1 Only	Control1 Only
P56537	IF6_HUMAN Eukaryotic translation initiation factor 6 OS=Homo sapiens GN=EIF6 PE=1 SV=1	245	26654.2		14	4	27.3	Carbamidomethyl (C),Oxidation (M)	8			6			6.809e-07			4.584e-07			Control1 Only	Control1 Only	0.673227	Control1 Only	Control1 Only
P62241	RS8_HUMAN 40S ribosomal protein S8 OS=Homo sapiens GN=RPS8 PE=1 SV=2	208	21920	Q5JR95;	13	5	32.4		6			7			4.357e-07			5.158e-07			Control1 Only	Control1 Only	1.18384	Control1 Only	Control1 Only
J3KTL2	J3KTL2_HUMAN Serine/arginine-rich-splicing factor 1 OS=Homo sapiens GN=SRSF1 PE=2 SV=1	253	27799.9	Q07955;	13	7	32.3	Oxidation (M)	5.94			6.93			2.338e-07			2.327e-07			Control1 Only	Control1 Only	0.995295	Control1 Only	Control1 Only
E7EMK3	E7EMK3_HUMAN Flotillin-2 OS=Homo sapiens GN=FLOT2 PE=2 SV=1	483	47160.7	J3QLD9;Q14254;	13	8	25.2		6			7			1.453e-07			1.687e-07			Control1 Only	Control1 Only	1.16105	Control1 Only	Control1 Only
O60306	AQR_HUMAN Intron-binding protein aquarius OS=Homo sapiens GN=AQR PE=1 SV=4	1485	171619		13	9	7.5	Oxidation (M)	9			4			2.506e-08			9.901e-09			Control1 Only	Control1 Only	0.395092	Control1 Only	Control1 Only
Q9C075	K1C23_HUMAN Keratin, type I cytoskeletal 23 OS=Homo sapiens GN=KRT23 PE=1 SV=2	422	48227.3		13	9	24.4	Oxidation (M)	6.98			5.98			1.377e-07			9.81e-08			Control1 Only	Control1 Only	0.712418	Control1 Only	Control1 Only
P16104	H2AX_HUMAN Histone H2AX OS=Homo sapiens GN=H2AFX PE=1 SV=2	143	15171.4		13	13	72		3.5			6.5			1.534e-06			2.346e-06			Control1 Only	Control1 Only	1.52934	Control1 Only	Control1 Only
Q9Y277	VDAC3_HUMAN Voltage-dependent anion-selective channel protein 3 OS=Homo sapiens GN=VDAC3 PE=1 SV=1	283	30711.3		12	9	37.8	Carbamidomethyl (C)	6.9			4.93			3.153e-07			1.365e-07			Control1 Only	Control1 Only	0.432921	Control1 Only	Control1 Only
P21796	VDAC1_HUMAN Voltage-dependent anion-selective channel protein 1 OS=Homo sapiens GN=VDAC1 PE=1 SV=2	283	30825.6		12	8	30.4	Carbamidomethyl (C)	7			5			3.016e-07			1.957e-07			Control1 Only	Control1 Only	0.648873	Control1 Only	Control1 Only
O75531	BAF_HUMAN Barrier-to-autointegration factor OS=Homo sapiens GN=BANF1 PE=1 SV=1	89	10070		11	4	50.6	Oxidation (M)	4			7			1.572e-06			2.114e-06			Control1 Only	Control1 Only	1.34478	Control1 Only	Control1 Only
Q8TDN6	BRX1_HUMAN Ribosome biogenesis protein BRX1 homolog OS=Homo sapiens GN=BRIX1 PE=1 SV=2	353	41465		11	6	20.7	Oxidation (M)	4			7			1.128e-07			1.581e-07			Control1 Only	Control1 Only	1.4016	Control1 Only	Control1 Only
P46087	NOP2_HUMAN Putative ribosomal RNA methyltransferase NOP2 OS=Homo sapiens GN=NOP2 PE=1 SV=2	812	93055	P46087-2;P46087-3;P46087-4;	11	6	11.1		4.99			5.99			8.998e-08			8.608e-08			Control1 Only	Control1 Only	0.956657	Control1 Only	Control1 Only
P05387	RLA2_HUMAN 60S acidic ribosomal protein P2 OS=Homo sapiens GN=RPLP2 PE=1 SV=1	115	11675.9		11	5	56.5	Oxidation (M)	6			5			8.267e-07			5.894e-07			Control1 Only	Control1 Only	0.712955	Control1 Only	Control1 Only
P57053	H2BFS_HUMAN Histone H2B type F-S OS=Homo sapiens GN=H2BFS PE=1 SV=2	126	13971.6		11	21	83.3	Gln->pyro-Glu (N-term Q),Glu->pyro-Glu (N-term E),Oxidation (M)	4.94			5.93			5.11e-07			4.349e-07			Control1 Only	Control1 Only	0.851076	Control1 Only	Control1 Only
Q12788	TBL3_HUMAN Transducin beta-like protein 3 OS=Homo sapiens GN=TBL3 PE=1 SV=2	808	89212.6		11	8	13.5		7			4			9.259e-08			5.362e-08			Control1 Only	Control1 Only	0.579112	Control1 Only	Control1 Only
Q92522	H1X_HUMAN Histone H1x OS=Homo sapiens GN=H1FX PE=1 SV=1	213	22527.6		10	6	30.5	Acetylation (Protein N-term),Oxidation (M)	6			4			4.346e-07			2.94e-07			Control1 Only	Control1 Only	0.676484	Control1 Only	Control1 Only
P68431	H31_HUMAN Histone H3.1 OS=Homo sapiens GN=HIST1H3A PE=1 SV=2	136	15430.5		10	18	88.2	Carbamidomethyl (C),Gln->pyro-Glu (N-term Q),Glu->pyro-Glu (N-term E),Oxidation (M)	3.5			3.5			2.106e-06			1.931e-06			Control1 Only	Control1 Only	0.916904	Control1 Only	Control1 Only
P46783	RS10_HUMAN 40S ribosomal protein S10 OS=Homo sapiens GN=RPS10 PE=1 SV=1	165	18921.9		10	6	32.1		3.99			5.99			4.648e-07			5.62e-07			Control1 Only	Control1 Only	1.20912	Control1 Only	Control1 Only
Q8N257	H2B3B_HUMAN Histone H2B type 3-B OS=Homo sapiens GN=HIST3H2BB PE=1 SV=3	126	13935.6		10	17	73	Gln->pyro-Glu (N-term Q),Oxidation (M)	4.97			4.97			5.303e-06			4.65e-06			Control1 Only	Control1 Only	0.876862	Control1 Only	Control1 Only
P62263	RS14_HUMAN 40S ribosomal protein S14 OS=Homo sapiens GN=RPS14 PE=1 SV=3	151	16298.6		10	4	18.5		5			5			9.364e-07			4.915e-07			Control1 Only	Control1 Only	0.524883	Control1 Only	Control1 Only
P62753	RS6_HUMAN 40S ribosomal protein S6 OS=Homo sapiens GN=RPS6 PE=1 SV=1	249	28735		10	5	20.9	Oxidation (M)	3.99			5.99			2.753e-07			3.664e-07			Control1 Only	Control1 Only	1.33091	Control1 Only	Control1 Only
P08708	RS17_HUMAN 40S ribosomal protein S17 OS=Homo sapiens GN=RPS17 PE=1 SV=2	135	15576.4	P0CW22;	10	3	31.1	Oxidation (M)	3.99			5.98			3.51e-07			4.287e-07			Control1 Only	Control1 Only	1.22137	Control1 Only	Control1 Only
Q14137	BOP1_HUMAN Ribosome biogenesis protein BOP1 OS=Homo sapiens GN=BOP1 PE=1 SV=2	746	72065.1	Q96Q25;	10	6	9		4.98			4.97			1.065e-07			9.368e-08			Control1 Only	Control1 Only	0.879624	Control1 Only	Control1 Only
Q6DKI1	RL7L_HUMAN 60S ribosomal protein L7-like 1 OS=Homo sapiens GN=RPL7L1 PE=1 SV=1	246	28715.1		10	5	24		4.97			4.97			2.639e-07			2.74e-07			Control1 Only	Control1 Only	1.03827	Control1 Only	Control1 Only
Q9BUP0	EFHD1_HUMAN EF-hand domain-containing protein D1 OS=Homo sapiens GN=EFHD1 PE=1 SV=1	239	26964.9		10	7	37.2		2			7.99			5.144e-08			3.343e-07			Control1 Only	Control1 Only	6.49883	Control1 Only	Control1 Only
Q9H7B2	RPF2_HUMAN Ribosome production factor 2 homolog OS=Homo sapiens GN=RPF2 PE=1 SV=2	306	35650.2		10	7	26.5		3			7			1.683e-07			3.323e-07			Control1 Only	Control1 Only	1.97445	Control1 Only	Control1 Only
B5MC59	B5MC59_HUMAN Replication protein A 14 kDa subunit OS=Homo sapiens GN=RPA3 PE=2 SV=1	82	13595.9	P35244;	9	2	32.9	Oxidation (M)	4			5			7.319e-07			6.165e-07			Control1 Only	Control1 Only	0.842328	Control1 Only	Control1 Only
CONT_LALBA_BOVIN	Possible Contaminant LALBA_BOVIN	142	16271.9		9	4	35.2	Carbamidomethyl (C),Oxidation (M)		9						8.511e-07					Control2 Only
Q9UBG3	CRNN_HUMAN Cornulin OS=Homo sapiens GN=CRNN PE=1 SV=1	495	53645.7		9	8	26.1	Carbamidomethyl (C)						9						9.445e-08					Sample3 Only
Q9UNX4	WDR3_HUMAN WD repeat-containing protein 3 OS=Homo sapiens GN=WDR3 PE=1 SV=1	943	106302		9	6	8.2		5			4			6.188e-08			4.476e-08			Control1 Only	Control1 Only	0.723335	Control1 Only	Control1 Only
J3KTE4	J3KTE4_HUMAN Ribosomal protein L19 OS=Homo sapiens GN=RPL19 PE=2 SV=1	194	23505.3	J3QR09;P84098;	9	7	26.9		3			6			3.405e-07			6.108e-07			Control1 Only	Control1 Only	1.79383	Control1 Only	Control1 Only
C9J6C5	C9J6C5_HUMAN MKI67 FHA domain-interacting nucleolar phosphoprotein (Fragment) OS=Homo sapiens GN=NIFK PE=2 SV=1	166	34273.1	Q9BYG3;	9	3	25.3		5			4			3.952e-07			3.165e-07			Control1 Only	Control1 Only	0.80086	Control1 Only	Control1 Only
B4DJP7	B4DJP7_HUMAN Small nuclear ribonucleoprotein Sm D3 OS=Homo sapiens GN=SNRPD3 PE=2 SV=1	120	13943.3	P62318;	8	2	15.8	Oxidation (M)	4			4			6.283e-07			2.368e-07			Control1 Only	Control1 Only	0.37689	Control1 Only	Control1 Only
P49207	RL34_HUMAN 60S ribosomal protein L34 OS=Homo sapiens GN=RPL34 PE=1 SV=3	117	13302.5		8	4	21.4		3			5			5.333e-07			7.429e-07			Control1 Only	Control1 Only	1.39302	Control1 Only	Control1 Only
P62851	RS25_HUMAN 40S ribosomal protein S25 OS=Homo sapiens GN=RPS25 PE=1 SV=1	125	13769.7		8	3	20.8		4			4			1.147e-06			9.703e-07			Control1 Only	Control1 Only	0.845946	Control1 Only	Control1 Only
K7EK07	K7EK07_HUMAN Histone H3 (Fragment) OS=Homo sapiens GN=H3F3B PE=2 SV=1	132	15354.5	P84243;	8	17	90.9	Carbamidomethyl (C),Gln->pyro-Glu (N-term Q),Glu->pyro-Glu (N-term E),Oxidation (M)	3.98			3.98			3.257e-06			4.531e-06			Control1 Only	Control1 Only	1.39116	Control1 Only	Control1 Only
O00468-3	AGRIN_HUMAN Isoform 3 of Agrin OS=Homo sapiens GN=AGRN	2049	215319	O00468-6;	8	7	4.2		5.98			2			1.255e-08			5.264e-09			Control1 Only	Control1 Only	0.419442	Control1 Only	Control1 Only
P42766	RL35_HUMAN 60S ribosomal protein L35 OS=Homo sapiens GN=RPL35 PE=1 SV=2	123	14578.6		8	3	26	Gln->pyro-Glu (N-term Q)	3			5			3.745e-07			5.382e-07			Control1 Only	Control1 Only	1.43712	Control1 Only	Control1 Only
P48729	KC1A_HUMAN Casein kinase I isoform alpha OS=Homo sapiens GN=CSNK1A1 PE=1 SV=2	337	37633.2	P48729-2;Q71TU5;	8	4	15.7	Oxidation (M)	4.95			3.96			1.391e-07			1.18e-07			Control1 Only	Control1 Only	0.848311	Control1 Only	Control1 Only
Q06323	PSME1_HUMAN Proteasome activator complex subunit 1 OS=Homo sapiens GN=PSME1 PE=1 SV=1	249	28777.1		8	6	25.3		2.97			4.97			2.035e-07			2.531e-07			Control1 Only	Control1 Only	1.24373	Control1 Only	Control1 Only
P09661	RU2A_HUMAN U2 small nuclear ribonucleoprotein A' OS=Homo sapiens GN=SNRPA1 PE=1 SV=2	255	28470.2		8	5	20		3.97			4.97			2.03e-07			1.909e-07			Control1 Only	Control1 Only	0.940394	Control1 Only	Control1 Only
Q13148	TADBP_HUMAN TAR DNA-binding protein 43 OS=Homo sapiens GN=TARDBP PE=1 SV=1	414	44819.4		8	4	12.1		3.96			4.96			5.441e-08			7.87e-08			Control1 Only	Control1 Only	1.44643	Control1 Only	Control1 Only
Q15061	WDR43_HUMAN WD repeat-containing protein 43 OS=Homo sapiens GN=WDR43 PE=1 SV=3	677	75041.6		8	6	8.3		4			4			4.398e-08			6.378e-08			Control1 Only	Control1 Only	1.4502	Control1 Only	Control1 Only
Q8NI36	WDR36_HUMAN WD repeat-containing protein 36 OS=Homo sapiens GN=WDR36 PE=1 SV=1	951	105525		8	4	6.6		3.99			4			3.23e-08			2.538e-08			Control1 Only	Control1 Only	0.785759	Control1 Only	Control1 Only
B4DFJ5	B4DFJ5_HUMAN 28S ribosomal protein S25, mitochondrial OS=Homo sapiens GN=MRPS25 PE=2 SV=1	145	20139.3	B4DQG6;E7EPW2;P82663;	7	4	47.3	Oxidation (M)	4			3			3.268e-07			1.799e-07			Control1 Only	Control1 Only	0.55049	Control1 Only	Control1 Only
F5H315	F5H315_HUMAN Pre-mRNA-splicing factor SYF1 OS=Homo sapiens GN=XAB2 PE=2 SV=1	852	100199	Q9HCS7;	7	5	6.7		5			2			3.703e-08			8.101e-09			Control1 Only	Control1 Only	0.218769	Control1 Only	Control1 Only
Q9NV31	IMP3_HUMAN U3 small nucleolar ribonucleoprotein protein IMP3 OS=Homo sapiens GN=IMP3 PE=1 SV=1	184	21890.6		7	3	27.7		3			4			2.909e-07			2.526e-07			Control1 Only	Control1 Only	0.86834	Control1 Only	Control1 Only
B3KVR1	B3KVR1_HUMAN Small nuclear ribonucleoprotein-associated protein OS=Homo sapiens GN=SNRPN PE=2 SV=1	244	24652.1	J3QLE5;P14678;P14678-2;P14678-3;P63162;	7	3	21.9	Oxidation (M)	3			4			2.196e-07			2.585e-07			Control1 Only	Control1 Only	1.17714	Control1 Only	Control1 Only
Q9Y5S9	RBM8A_HUMAN RNA-binding protein 8A OS=Homo sapiens GN=RBM8A PE=1 SV=1	174	19912.8		7	4	27		3			5			4.441e-07			4.449e-07			Control1 Only	Control1 Only	1.0018	Control1 Only	Control1 Only
Q71DI3	H32_HUMAN Histone H3.2 OS=Homo sapiens GN=HIST2H3A PE=1 SV=3	136	15414.5		7	18	88.2	Carbamidomethyl (C),Gln->pyro-Glu (N-term Q),Glu->pyro-Glu (N-term E),Oxidation (M)	3			4			8.229e-06			8.491e-06			Control1 Only	Control1 Only	1.03184	Control1 Only	Control1 Only
C9JBJ6	C9JBJ6_HUMAN DNA-directed RNA polymerases I, II, and III subunit RPABC3 OS=Homo sapiens GN=POLR2H PE=2 SV=1	114	17168.5	C9JLU1;P52434;	7	4	39.5		4			3			3.445e-07			1.84e-07			Control1 Only	Control1 Only	0.534107	Control1 Only	Control1 Only
Q12965	MYO1E_HUMAN Unconventional myosin-Ie OS=Homo sapiens GN=MYO1E PE=1 SV=2	1108	127306		7	6	5.8		1			6			6.563e-09			4.514e-08			Control1 Only	Control1 Only	6.87795	Control1 Only	Control1 Only
O75569	PRKRA_HUMAN Interferon-inducible double-stranded RNA-dependent protein kinase activator A OS=Homo sapiens GN=PRKRA PE=1 SV=1	313	31687.2	O75569-2;O75569-3;	7	6	27.8	Carbamidomethyl (C)	1.98			4.95			9.598e-08			1.324e-07			Control1 Only	Control1 Only	1.37945	Control1 Only	Control1 Only
P04083	ANXA1_HUMAN Annexin A1 OS=Homo sapiens GN=ANXA1 PE=1 SV=2	346	38780		7	6	20.8							6.99						2.97e-07					Sample3 Only
P62266	RS23_HUMAN 40S ribosomal protein S23 OS=Homo sapiens GN=RPS23 PE=1 SV=3	143	15833.7		7	4	23.8		2			4.99			2.59e-07			3.842e-07			Control1 Only	Control1 Only	1.4834	Control1 Only	Control1 Only
Q07065	CKAP4_HUMAN Cytoskeleton-associated protein 4 OS=Homo sapiens GN=CKAP4 PE=1 SV=2	602	66162.8		7	5	11.3		4			3			4.85e-08			3.021e-08			Control1 Only	Control1 Only	0.622887	Control1 Only	Control1 Only
Q15269	PWP2_HUMAN Periodic tryptophan protein 2 homolog OS=Homo sapiens GN=PWP2 PE=1 SV=2	919	102657		7	4	5.1		4			3			7.439e-08			4.354e-08			Control1 Only	Control1 Only	0.585294	Control1 Only	Control1 Only
Q96A72	MGN2_HUMAN Protein mago nashi homolog 2 OS=Homo sapiens GN=MAGOHB PE=1 SV=1	148	17300.9		7	6	52	Acetylation (Protein N-term)	3.92			2.95			4.09e-07			1.55e-07			Control1 Only	Control1 Only	0.378973	Control1 Only	Control1 Only
Q14690	RRP5_HUMAN Protein RRP5 homolog OS=Homo sapiens GN=PDCD11 PE=1 SV=3	1871	209129		6	7	4.8		6						1.037e-08						Control1 Only	Control1 Only	Control1 Only	Control1 Only	Control1 Only
Q96A35	RM24_HUMAN 39S ribosomal protein L24, mitochondrial OS=Homo sapiens GN=MRPL24 PE=1 SV=1	216	24953		6	4	17.6		3			3			1.128e-07			1.285e-07			Control1 Only	Control1 Only	1.13918	Control1 Only	Control1 Only
Q9GZL7	WDR12_HUMAN Ribosome biogenesis protein WDR12 OS=Homo sapiens GN=WDR12 PE=1 SV=2	423	47803.8		6	3	5.7		3			3			6.362e-08			5.826e-08			Control1 Only	Control1 Only	0.91575	Control1 Only	Control1 Only
Q9NP55	BPIA1_HUMAN BPI fold-containing family A member 1 OS=Homo sapiens GN=BPIFA1 PE=1 SV=1	256	26768		6	3	13.7		3			3			1.021e-07			8.848e-08			Control1 Only	Control1 Only	0.866601	Control1 Only	Control1 Only
Q9Y2P8	RCL1_HUMAN RNA 3'-terminal phosphate cyclase-like protein OS=Homo sapiens GN=RCL1 PE=1 SV=3	373	40924.6		6	4	13.7	Acetylation (Protein N-term),Carbamidomethyl (C)	4			2			9.548e-08			5.01e-08			Control1 Only	Control1 Only	0.524717	Control1 Only	Control1 Only
F5GYQ1	F5GYQ1_HUMAN V-type proton ATPase subunit d 1 OS=Homo sapiens GN=ATP6V0D1 PE=2 SV=1	392	31727.9	J3QL14;P61421;R4GN72;	6	2	8.2		3			3			1.187e-07			1.151e-07			Control1 Only	Control1 Only	0.969671	Control1 Only	Control1 Only
C9J4Z3	C9J4Z3_HUMAN 60S ribosomal protein L37a OS=Homo sapiens GN=RPL37A PE=2 SV=1	68	10286.5	P61513;	6	4	61.8	Carbamidomethyl (C)	3.99			2			4.209e-07			1.396e-07			Control1 Only	Control1 Only	0.33167	Control1 Only	Control1 Only
B4DQI6	B4DQI6_HUMAN Transformer-2 protein homolog alpha OS=Homo sapiens GN=TRA2A PE=2 SV=1	180	32741.1	B4DUA9;Q13595;	6	6	28.3	Oxidation (M)	1.98			3.96			1.726e-07			1.717e-07			Control1 Only	Control1 Only	0.994786	Control1 Only	Control1 Only
Q9H552	Q9H552_HUMAN Uncharacterized protein OS=Homo sapiens PE=4 SV=1	499	55261.4		6	23	29.9	Gln->pyro-Glu (N-term Q),Oxidation (M)	4			2			5.958e-08			1.994e-08			Control1 Only	Control1 Only	0.334676	Control1 Only	Control1 Only
Q86Y46	K2C73_HUMAN Keratin, type II cytoskeletal 73 OS=Homo sapiens GN=KRT73 PE=1 SV=1	540	59030.8		6	13	17.8	Carbamidomethyl (C)	2			4			4.094e-08			5.272e-08			Control1 Only	Control1 Only	1.28774	Control1 Only	Control1 Only
P20290	BTF3_HUMAN Transcription factor BTF3 OS=Homo sapiens GN=BTF3 PE=1 SV=1	206	17724.2	P20290-2;	6	2	29.6		2			4			1.608e-07			1.8e-07			Control1 Only	Control1 Only	1.1194	Control1 Only	Control1 Only
Q8TED0	UTP15_HUMAN U3 small nucleolar RNA-associated protein 15 homolog OS=Homo sapiens GN=UTP15 PE=1 SV=3	518	58522.6		6	4	10	Acetylation (Protein N-term)	3.96			1.98			9.338e-08			5.493e-08			Control1 Only	Control1 Only	0.588242	Control1 Only	Control1 Only
A6NJD9	A6NJD9_HUMAN 39S ribosomal protein L23, mitochondrial OS=Homo sapiens GN=MRPL23 PE=2 SV=1	163	17806.1	A8MVT4;A8MYK1;H7C2P7;Q16540;	5	2	31.4		2			3			2.371e-07			1.832e-07			Control1 Only	Control1 Only	0.77267	Control1 Only	Control1 Only
Q96GQ7	DDX27_HUMAN Probable ATP-dependent RNA helicase DDX27 OS=Homo sapiens GN=DDX27 PE=1 SV=2	796	90013.3		5	3	4.6		3			2			6.877e-08			4.481e-08			Control1 Only	Control1 Only	0.651592	Control1 Only	Control1 Only
Q96PK6	RBM14_HUMAN RNA-binding protein 14 OS=Homo sapiens GN=RBM14 PE=1 SV=2	669	69647		5	3	7	Oxidation (M)	2			3			3.528e-08			5.188e-08			Control1 Only	Control1 Only	1.47052	Control1 Only	Control1 Only
A4D2Q0	A4D2Q0_HUMAN SUN domain-containing protein 1 OS=Homo sapiens GN=UNC84A PE=2 SV=1	974	102138	E7EP45;E9PHI4;H0Y6N5;H0Y742;O94901;O94901-5;O94901-6;O94901-8;O94901-9;	5	3	6.7		2			3			1.869e-08			2.665e-08			Control1 Only	Control1 Only	1.4259	Control1 Only	Control1 Only
H7BYN3	H7BYN3_HUMAN Transcription factor A, mitochondrial (Fragment) OS=Homo sapiens GN=TFAM PE=4 SV=1	219	29150.2	Q00059;	5	5	20.1		2			3			1.591e-07			1.043e-07			Control1 Only	Control1 Only	0.655563	Control1 Only	Control1 Only
F8WCF6	F8WCF6_HUMAN Actin-related protein 2/3 complex subunit 4 OS=Homo sapiens GN=ARPC4 PE=2 SV=1	181	21628.2	F8WDD7;P59998;P59998-2;P59998-3;	5	2	16.8		2.97			1.98			2.075e-07			1.617e-07			Control1 Only	Control1 Only	0.779277	Control1 Only	Control1 Only
O00566	MPP10_HUMAN U3 small nucleolar ribonucleoprotein protein MPP10 OS=Homo sapiens GN=MPHOSPH10 PE=1 SV=2	681	79013.8		5	2	3.2		2			3			3.234e-08			4.394e-08			Control1 Only	Control1 Only	1.35869	Control1 Only	Control1 Only
Q969X6	CIR1A_HUMAN Cirhin OS=Homo sapiens GN=CIRH1A PE=1 SV=1	686	69774.4	Q969X6-3;	5	2	3.7		1.98			2.97			4.216e-08			4.496e-08			Control1 Only	Control1 Only	1.06641	Control1 Only	Control1 Only
O15213	WDR46_HUMAN WD repeat-containing protein 46 OS=Homo sapiens GN=WDR46 PE=1 SV=3	610	68208.9		5	4	7.2		2			3			7.528e-08			8.954e-08			Control1 Only	Control1 Only	1.18943	Control1 Only	Control1 Only
E7EMB3	E7EMB3_HUMAN Calmodulin OS=Homo sapiens GN=CALM2 PE=2 SV=1	196	16862.9	E7ETZ0;H0Y7A7;P62158;	5	2	22.1		1.98			2.97			8.576e-08			1.765e-07			Control1 Only	Control1 Only	2.05807	Control1 Only	Control1 Only
E7ETA6	E7ETA6_HUMAN Pericentriolar material 1 protein OS=Homo sapiens GN=PCM1 PE=2 SV=1	2016	222662	E7EV56;Q15154;Q15154-2;	5	3	1.8		3			2			5.844e-09			6.276e-09			Control1 Only	Control1 Only	1.07392	Control1 Only	Control1 Only
Q9HD33	RM47_HUMAN 39S ribosomal protein L47, mitochondrial OS=Homo sapiens GN=MRPL47 PE=1 SV=2	250	27122.7	Q9HD33-2;	5	3	10.4	Oxidation (M)	1			4			2.503e-08			1.214e-07			Control1 Only	Control1 Only	4.85018	Control1 Only	Control1 Only
F8W6H6	F8W6H6_HUMAN Unconventional myosin-Va OS=Homo sapiens GN=MYO5A PE=2 SV=1	1880	219027	F8WE88;G3V394;Q9Y4I1;Q9Y4I1-2;Q9Y4I1-3;	5	8	4.9	Carbamidomethyl (C)	2			3			1.528e-09			6.24e-09			Control1 Only	Control1 Only	4.08377	Control1 Only	Control1 Only
B4DGD3	B4DGD3_HUMAN Uridine-cytidine kinase 2 OS=Homo sapiens GN=UCK2 PE=2 SV=1	130	29353.1	Q9BZX2;	4	2	20.8		2			2			1.67e-07			1.137e-07			Control1 Only	Control1 Only	0.680838	Control1 Only	Control1 Only
B4DQJ8	B4DQJ8_HUMAN 6-phosphogluconate dehydrogenase, decarboxylating OS=Homo sapiens GN=PGD PE=2 SV=1	470	53250	F5H7U0;K7EM49;K7EMN2;K7EPF6;P52209;	4	3	23.1		2			2			4.489e-08			3.61e-08			Control1 Only	Control1 Only	0.804188	Control1 Only	Control1 Only
C9J3L7	C9J3L7_HUMAN Replication initiator 1 OS=Homo sapiens GN=REPIN1 PE=2 SV=2	624	63696.1	C9JYJ8;C9JZE3;E7EVL6;Q9BWE0;	4	2	21.2		2			2			1.149e-08			1.079e-08			Control1 Only	Control1 Only	0.939077	Control1 Only	Control1 Only
E7ETK0	E7ETK0_HUMAN 40S ribosomal protein S24 OS=Homo sapiens GN=RPS24 PE=2 SV=1	131	32482	P62847;P62847-2;P62847-3;P62847-4;	4	2	20.8	Oxidation (M)	2			2			5.987e-07			5.535e-07			Control1 Only	Control1 Only	0.924503	Control1 Only	Control1 Only
K7EJ20	K7EJ20_HUMAN Glutathione peroxidase (Fragment) OS=Homo sapiens GN=GPX4 PE=3 SV=2	260	16832.6	K7EKX7;K7ENB4;K7ERP4;P36969;P36969-2;R4GNE4;	4	3	20.6	Carbamidomethyl (C)	3			1			1.415e-07			1.722e-08			Control1 Only	Control1 Only	0.121696	Control1 Only	Control1 Only
Q12905	ILF2_HUMAN Interleukin enhancer-binding factor 2 OS=Homo sapiens GN=ILF2 PE=1 SV=2	390	43143.2		4	3	11.3		1			3			1.942e-08			6.058e-08			Control1 Only	Control1 Only	3.11946	Control1 Only	Control1 Only
Q8IWA0	WDR75_HUMAN WD repeat-containing protein 75 OS=Homo sapiens GN=WDR75 PE=1 SV=1	830	94672.6		4	4	4.9		2			2			1.371e-08			1.846e-08			Control1 Only	Control1 Only	1.34646	Control1 Only	Control1 Only
Q9BVP2	GNL3_HUMAN Guanine nucleotide-binding protein-like 3 OS=Homo sapiens GN=GNL3 PE=1 SV=2	549	60646.6	Q9BVP2-2;	4	3	8.8		1			3			2.495e-08			3.758e-08			Control1 Only	Control1 Only	1.50621	Control1 Only	Control1 Only
B0QYD3	B0QYD3_HUMAN DNA dC-)dU-editing enzyme APOBEC-3B OS=Homo sapiens GN=APOBEC3B PE=2 SV=1	490	43142.6	Q9UH17;Q9UH17-3;	4	2	8.1		1.98			1.98			3.792e-08			4.048e-08			Control1 Only	Control1 Only	1.06751	Control1 Only	Control1 Only
J3KQE0	J3KQE0_HUMAN SUN domain-containing protein 2 OS=Homo sapiens GN=SUN2 PE=2 SV=1	706	82667.7	Q9UH99;Q9UH99-2;	4	4	6.7		2			2			1.497e-08			1.396e-08			Control1 Only	Control1 Only	0.932532	Control1 Only	Control1 Only
Q99959	PKP2_HUMAN Plakophilin-2 OS=Homo sapiens GN=PKP2 PE=1 SV=2	881	92932.7	Q99959-2;	4	2	2.3		2			2			1.652e-08			1.565e-08			Control1 Only	Control1 Only	0.947337	Control1 Only	Control1 Only
B5ME19	EIFCL_HUMAN Eukaryotic translation initiation factor 3 subunit C-like protein OS=Homo sapiens GN=EIF3CL PE=2 SV=1	914	105548	H3BRV0;Q99613;	4	3	4.4				3		1				2.004e-08		5.721e-09			Control3 Only		Sample2 Only
P29373	RABP2_HUMAN Cellular retinoic acid-binding protein 2 OS=Homo sapiens GN=CRABP2 PE=1 SV=2	138	9263.78	Q5SYZ4;	4	2	22		2			2			9.82e-08			6.338e-08			Control1 Only	Control1 Only	0.645418	Control1 Only	Control1 Only
E7ENR5	E7ENR5_HUMAN U3 small nucleolar ribonucleoprotein protein IMP4 (Fragment) OS=Homo sapiens GN=IMP4 PE=2 SV=1	236	33807.6	H0Y714;Q96G21;	4	3	16.5		1			2.99			5.888e-08			1.595e-07			Control1 Only	Control1 Only	2.7089	Control1 Only	Control1 Only
P56182	RRP1_HUMAN Ribosomal RNA processing protein 1 homolog A OS=Homo sapiens GN=RRP1 PE=1 SV=1	461	52932.6		4	3	6.7		2			2			3.438e-08			5.889e-08			Control1 Only	Control1 Only	1.71291	Control1 Only	Control1 Only
P11388	TOP2A_HUMAN DNA topoisomerase 2-alpha OS=Homo sapiens GN=TOP2A PE=1 SV=3	1531	183035	P11388-2;P11388-3;P11388-4;	4	4	3.1		2.99					1	8.16e-09					2.337e-09	Control1 Only	Control1 Only	Control1 Only	Control1 Only	0.286397
Q8IUE6	H2A2B_HUMAN Histone H2A type 2-B OS=Homo sapiens GN=HIST2H2AB PE=1 SV=3	130	14022.9		4	10	66.2		1.98			1.98			5.994e-06			6.771e-06			Control1 Only	Control1 Only	1.12963	Control1 Only	Control1 Only
E9PPU0	E9PPU0_HUMAN Epiplakin OS=Homo sapiens GN=EPPK1 PE=4 SV=1	2420	265182		4	85	47.4	Carbamidomethyl (C),Gln->pyro-Glu (N-term Q),Oxidation (M)	2			2			1.209e-08			9.659e-09			Control1 Only	Control1 Only	0.798925	Control1 Only	Control1 Only
Q5JTH9	RRP12_HUMAN RRP12-like protein OS=Homo sapiens GN=RRP12 PE=1 SV=2	1297	137388	Q5JTH9-2;Q5JTH9-3;	4	4	3.8		3			1			9.825e-09			5.793e-10			Control1 Only	Control1 Only	0.0589618	Control1 Only	Control1 Only
Q6SJ93	F111B_HUMAN Protein FAM111B OS=Homo sapiens GN=FAM111B PE=1 SV=1	734	81346.9	Q6SJ93-2;	4	4	7.7		3			1			5.48e-08			1.637e-08			Control1 Only	Control1 Only	0.298723	Control1 Only	Control1 Only
Q96S19	CP013_HUMAN UPF0585 protein C16orf13 OS=Homo sapiens GN=C16orf13 PE=1 SV=2	204	22617.7		4	4	27		1.99			1.99			5.927e-08			1.084e-07			Control1 Only	Control1 Only	1.82892	Control1 Only	Control1 Only
E7ESU4	E7ESU4_HUMAN N-acetyltransferase 10 OS=Homo sapiens GN=NAT10 PE=2 SV=1	953	115963	Q9H0A0;	3	2	2.9		2			1			1.009e-08			1.451e-09			Control1 Only	Control1 Only	0.143806	Control1 Only	Control1 Only
Q9NVP1	DDX18_HUMAN ATP-dependent RNA helicase DDX18 OS=Homo sapiens GN=DDX18 PE=1 SV=2	670	75557.6		3	5	8.4		1			2			1.445e-08			6.354e-08			Control1 Only	Control1 Only	4.39723	Control1 Only	Control1 Only
J3KPN6	J3KPN6_HUMAN Involucrin OS=Homo sapiens GN=IVL PE=2 SV=1	439	68599.3	P07476;	3	3	6.8							3						5.663e-08					Sample3 Only
O75934	SPF27_HUMAN Pre-mRNA-splicing factor SPF27 OS=Homo sapiens GN=BCAS2 PE=1 SV=1	225	26169		3	2	11.6		1			2			4.206e-08			6.48e-08			Control1 Only	Control1 Only	1.54066	Control1 Only	Control1 Only
Q9Y3Y2	CHTOP_HUMAN Chromatin target of PRMT1 protein OS=Homo sapiens GN=CHTOP PE=1 SV=2	248	21958.8	Q9Y3Y2-3;Q9Y3Y2-4;	3	2	12.9	Oxidation (M)				3						6.581e-08					Sample1 Only
Q9Y5J1	UTP18_HUMAN U3 small nucleolar RNA-associated protein 18 homolog OS=Homo sapiens GN=UTP18 PE=1 SV=3	556	62126.5		3	3	5.8		1.99			1			6.335e-08			1.821e-08			Control1 Only	Control1 Only	0.287451	Control1 Only	Control1 Only
H7BZ20	H7BZ20_HUMAN Thymidylate kinase (Fragment) OS=Homo sapiens GN=DTYMK PE=4 SV=1	192	23858.5	P23919;	3	2	10.9		1.99			0.99			9.034e-08			3.782e-08			Control1 Only	Control1 Only	0.418641	Control1 Only	Control1 Only
Q9Y676	RT18B_HUMAN 28S ribosomal protein S18b, mitochondrial OS=Homo sapiens GN=MRPS18B PE=1 SV=1	258	29449.1		3	2	9.7		2			1			8.71e-08			4.511e-08			Control1 Only	Control1 Only	0.51791	Control1 Only	Control1 Only
E9PJM3	E9PJM3_HUMAN F-box only protein 3 OS=Homo sapiens GN=FBXO3 PE=2 SV=1	430	47052.5	G3V1E0;Q9UK99;Q9UK99-2;Q9UK99-3;	3	2	7.8				2			1			1.031e-07			6.783e-08		Control3 Only			Sample3 Only
J3QLQ6	J3QLQ6_HUMAN Nucleolar protein 11 (Fragment) OS=Homo sapiens GN=NOL11 PE=2 SV=1	189	18623.6	Q9H8H0;Q9H8H0-2;	3	2	13.6		2			1			1.97e-07			4.304e-08			Control1 Only	Control1 Only	0.218477	Control1 Only	Control1 Only
P38117	ETFB_HUMAN Electron transfer flavoprotein subunit beta OS=Homo sapiens GN=ETFB PE=1 SV=3	255	37501.1	P38117-2;	3	2	8.2		2			1			9.528e-08			3.673e-08			Control1 Only	Control1 Only	0.385495	Control1 Only	Control1 Only
Q10589	BST2_HUMAN Bone marrow stromal antigen 2 OS=Homo sapiens GN=BST2 PE=1 SV=1	180	18418.8	Q10589-2;	3	2	14.9		2			1			2.043e-07			6.837e-08			Control1 Only	Control1 Only	0.334655	Control1 Only	Control1 Only
Q9H0U3	MAGT1_HUMAN Magnesium transporter protein 1 OS=Homo sapiens GN=MAGT1 PE=1 SV=1	335	38101.5		3	2	5.7		2			1			1.04e-07			2.034e-08			Control1 Only	Control1 Only	0.195577	Control1 Only	Control1 Only
E9PCV0	E9PCV0_HUMAN Beta-glucuronidase OS=Homo sapiens GN=GUSB PE=2 SV=1	505	69259.9	P08236;P08236-2;	3	3	6.9				1			2			1.585e-08			5.081e-08		Control3 Only			Sample3 Only
G3V5X4	G3V5X4_HUMAN Nesprin-2 OS=Homo sapiens GN=SYNE2 PE=2 SV=1	6818	377929	Q8WXH0;Q8WXH0-2;Q8WXH0-7;	3	2	0.7		1			2			8.465e-10			1.177e-09			Control1 Only	Control1 Only	1.39043	Control1 Only	Control1 Only
P22531	SPR2E_HUMAN Small proline-rich protein 2E OS=Homo sapiens GN=SPRR2E PE=2 SV=2	72	8169.74	P22532;P35325;P35326;Q9BYE4;	3	2	43.1	Carbamidomethyl (C)						2.98						1.494e-07					Sample3 Only
Q13637	RAB32_HUMAN Ras-related protein Rab-32 OS=Homo sapiens GN=RAB32 PE=1 SV=3	225	25035.7		3	2	9.8		2			1			4.792e-08			9.123e-09			Control1 Only	Control1 Only	0.19038	Control1 Only	Control1 Only
K7ERN7	K7ERN7_HUMAN Notchless protein homolog 1 OS=Homo sapiens GN=NLE1 PE=2 SV=1	127	53431.2	Q9NVX2;	3	2	18.9		2			1			1.613e-07			8.704e-08			Control1 Only	Control1 Only	0.539616	Control1 Only	Control1 Only
C9JMC5	C9JMC5_HUMAN Aldehyde dehydrogenase, dimeric NADP-preferring (Fragment) OS=Homo sapiens GN=ALDH3A1 PE=2 SV=1	372	50488.9	E9PNN6;I3L3I9;P30838;	3	4	12.9							2.99						4.454e-08					Sample3 Only
B4DXW1	B4DXW1_HUMAN Actin-related protein 3 OS=Homo sapiens GN=ACTR3 PE=2 SV=1	367	47449	F5H3P5;P61158;	3	3	8.7					3						9.779e-08					Sample1 Only
K4DI93	K4DI93_HUMAN Cullin 4B, isoform CRA_e OS=Homo sapiens GN=CUL4B PE=2 SV=1	900	84161.7	Q13620;Q13620-1;Q13620-3;	3	3	4.6				2.98						2.991e-08					Control3 Only
P11047	LAMC1_HUMAN Laminin subunit gamma-1 OS=Homo sapiens GN=LAMC1 PE=1 SV=3	1609	177957		3	3	2.5		2			1			3.227e-09			2.023e-09			Control1 Only	Control1 Only	0.626898	Control1 Only	Control1 Only
P28074	PSB5_HUMAN Proteasome subunit beta type-5 OS=Homo sapiens GN=PSMB5 PE=1 SV=3	263	28534.3		3	2	8.4		1.98				0.99		4.68e-08				2.728e-08		Control1 Only	Control1 Only	Control1 Only	0.582906	Control1 Only
E7EN32	E7EN32_HUMAN Menin OS=Homo sapiens GN=MEN1 PE=2 SV=1	555	63869.9	O00255;O00255-2;O00255-3;	3	3	6.7				2			1			2.101e-08			1.794e-08		Control3 Only			Sample3 Only
O43818	U3IP2_HUMAN U3 small nucleolar RNA-interacting protein 2 OS=Homo sapiens GN=RRP9 PE=1 SV=1	475	51934.6		3	2	4.4		2			1			8.292e-08			4.613e-08			Control1 Only	Control1 Only	0.556319	Control1 Only	Control1 Only
B1AVQ5	B1AVQ5_HUMAN Mucin-1 subunit alpha OS=Homo sapiens GN=MUC1 PE=2 SV=1	475	29645.9	B1AVQ7;P15941;P15941-11;P15941-15;P15941-17;P15941-2;P15941-3;P15941-4;P15941-6;P15941-7;P15941-8;	3	2	12.5		1.98			0.99			4.173e-08			2.082e-08			Control1 Only	Control1 Only	0.498922	Control1 Only	Control1 Only
[truncated: 84 more rows]

## Sheet: 3) Cyto_FLAG_RNase
Supplemental Table 3. Cytoplasmic FLAG-AGO2 RNase
									SPECTRAL COUNTS						SPECTRAL INDEX (MIC SIn)						RATIOS
[truncated: 695 more rows]

## Sheet: 4) Cyto_Endog_RNase
Supplemental Table 4. Cytoplasmic Endogenous RNase
[truncated: 659 more rows]

[truncated: 6 more sheets: 5) Nuc_FLAG_non, 6) Nuc_Endog_non, 7) Nuc_FLAG_RNase, 8) Nuc_Endog_RNase, 9) Whole_Cell_1, 10) Whole_Cell_2]
